# Supplementary material for: The ER tether VAPA is required for proper cell motility and anchors ER-PM contact sites to focal adhesions
Source: eLife journal article supplement (doi:10.7554/elife.85962), 2024-02-08
Supplement: fig1-data1 [file Figure1.xlsx]

## Sheet: Fig1A
Relative VAPA grey levels normalized to tubulin	Control	VAPA KO
	1	0.05
	1	0
	1	0.11

## Sheet: Fig1E
Relative colonized surface within 15h	Control	VAPA KO	VAPA KO+Ch-VAPA	VAPA KO+Ch-VAPA KD/MD
	1	0.802457	0.878181	0.803801
	1	0.729946	0.96381	0.712406
	1	0.752494	0.905552	0.752256

## Sheet: Fig1F
Leader cell velocity (µm.min-1)	Control	VAPA KO	VAPA KO+Ch-VAPA	VAPA KO+Ch-VAPA KD/MD
	0.816931	0.869816	0.7395	0.918279
	0.673418	1.13051	0.628971	0.870515
	0.75338	1.63937	0.741088	0.831612
	0.726813	1.23083	0.762029	0.868107
	0.727279	1.23083	0.935265	0.921813
	0.815212	1.0928	0.892214	0.961235
	0.701814	1.0639	0.933289	0.985792
	0.670725	0.944881	0.877654	1.06144
	0.670725	0.830059	0.887712	1.21353
	0.66232	0.825157	0.889348	1.00775
	0.600088	1.03981	0.959438	0.873595
	0.62307	0.950863	0.97615	0.953742
	0.704765	1.22131	0.868822	1.08712
	0.820824	0.981774	0.754379	1.08409
	0.717771	0.867892	0.692922	1.12132
	0.712441	0.828455	0.680892	1.19771
	0.62099	0.730088	0.652242	1.06218
	0.540451	0.936228	1.01928	1.54656
	0.624394	1.30451	0.825172	0.843051
	0.470081	1.01733	0.793154	0.760081
	0.707252	0.951293	0.913115	0.906172
	0.459192	1.02073	0.753111	0.812439
	0.455283	1.02925	0.910859	0.840929
	0.650596	0.833256	0.896303	1.29252
	0.62099	1.05741	0.878768	1.0639
	0.602333	1.08863	0.922182	1.15915
	0.437717	0.911737	0.786889	0.938778
	0.606566	1.15813	0.823535	0.885657
	0.606172	0.908586	0.882267	1.02
	0.514247	1.07691	0.822485	0.939188
	0.524139	0.969178	0.883733	0.901782
	0.633614	1.00747	0.722594	1.05573
	0.526109	0.690733	0.863137	0.84846
	0.81174	1.09277	0.770198	1.22501
	0.558495	1.21348	0.805366	0.887455
	0.637455	0.927386	0.788129	1.03804
	0.602554	0.822	0.667069	0.774881
	0.679455	0.78695	0.8017	0.8517
	0.69105	0.88545

## Sheet: Fig1G
Leader cell directionality	Control	VAPA KO	VAPA KO+Ch-VAPA	VAPA KO+Ch-VAPA KD/MD
	0.888721	0.553215	0.864739	0.726971
	0.960987	0.519434	0.904109	0.787794
	0.890859	0.719581	0.870568	0.708465
	0.91997	0.513492	0.922725	0.743471
	0.884767	0.599459	0.889116	0.740344
	0.92608	0.478324	0.848175	0.601833
	0.850741	0.257198	0.905714	0.721335
	0.924107	0.799381	0.91018	0.522255
	0.908549	0.399673	0.906806	0.365233
	0.852686	0.69076	0.908401	0.541795
	0.877173	0.351304	0.944505	0.63129
	0.903103	0.39765	0.846869	0.867478
	0.926651	0.489627	0.866188	0.72009
	0.904518	0.518563	0.934548	0.903753
	0.88626	0.436629	0.900586	0.673042
	0.522859	0.480502	0.951032	0.755568
	0.911991	0.542105	0.922505	0.970561
	0.90805	0.604864	0.946292	0.957698
	0.939786	0.758901	0.927391	0.9346
	0.896092	0.788897	0.917754	0.952721
	0.931755	0.631264	0.909051	0.64919
	0.917404	0.522516	0.677273	0.568873
	0.946002	0.783337	0.772006	0.403786
	0.947766	0.815691	0.785937	0.512394
	0.956637	0.870517	0.863546	0.551721
	0.959187	0.636922	0.801099
	0.974663	0.70001	0.648103
	0.953499	0.831506	0.694478
	0.941948	0.826171	0.713926
	0.869882	0.506095	0.942342
	0.948509	0.462513	0.900793
	0.954335	0.635202
	0.920281	0.649357
		0.771755
		0.705882

## Sheet: Fig1I
Individual cell directionality	Control	VAPA KO
	0.131102	0.285239
	0.0409501	0.234748
	0.568062	0.117788
	0.422356	0.323257
	0.633714	0.341
	0.696058	0.035
	0.457815	0.107
	0.334885	0.141
	0.203855	0.078
	0.0977379	0.2
	0.320469	0.117
	0.332001	0.094
	0.346894	0.277
	0.212379	0.062
	0.0536872	0.129
	0.557275	0.069
	0.627258	0.155
	0.234961	0.012
	0.405	0.021
	0.358	0.022
	0.022	0.071
	0.081	0.011
	0.055	0.343
	0.148	0.09
	0.069	0.000830522
	0.194	0.000174125
	0.082	0.000988165
	0.206	0.00286106
	0.038	0.00288522
	0.026	0.00100258
	0.17	0.00393916
	0.088	0.00341036
	0.351	0.000764812
	0.658
	0.101
	0.132
	0.263
	0.116
	0.049
	0.205
	0.096
	0.411
	0.02
	0.868
	0.115
	0.739
	0.06
	0.038
	0.139
	0.126
	0.017
	0.00200516
	0.00324276
	0.00656621
	0.039841
	0.0442353
	0.0200308
	0.0311138
	0.00483229
	0.000969639
	0.00676741
	0.00451247
	0.00613331
	0.00121812

## Sheet: Fig1J
Individual cell velocity (µm.min-1 )	Control	VAPA KO	VAPA KO+Ch-VAPA	VAPA KO+Ch-VAPA KD/MD
	0.110187	0.561778	0.824306	1.87607
	0.415257	1.10977	0.129455	0.887729
	0.648	1.27913	0.705542	1.91253
	0.272693	0.691377	0.548722	1.55296
	0.567174	1.60059	2.28736	0.942805
	0.190222	1.41184	2.01279	1.25389
	0.579431	1.68395	0.667424	1.26388
	1.00384	1.90207	2.14254	2.00813
	0.263743	0.982585	1.0971	1.23846
	0.705187	0.516411	0.909621	1.35879
	0.48897	1.57784	0.563847	2.56194
	0.102697	1.73312	0.698232	2.52895
	0.425292	1.00053	0.479131	1.56184
	0.220596	0.818061	1.30864	1.90805
	0.307215	1.66847	1.06159	2.5715
	0.726222	1.76339	1.12966	1.0475
	0.678787	1.85909	0.0742857	2.0417
	0.242302	1.86634	1.68881	2.28644
	0.633788	1.53908	1.0655	1.14618
	1.32626	1.67242	0.78387	1.45273
	1.24474	2.66229	0.79375	1.8979
	0.840525	0.899812	0.686222	2.04167
	0.322723	2.98491	0.213091	0.699303
	0.472515	1.50575	0.257828	2.38764
	0.46701	2.16063	0.894889	1.55993
	0.957297	2.15026	0.121622	1.68068
	0.95404	2.34395	1.72058	1.94763
	0.94198		0.374294	2.89638
	1.17246		2.14525	1.4909
	0.316089		1.14	0.980574
	0.436782		0.956584	2.08383
	0.57699		0.447415	1.83824
	1.0045		1.50296	2.28564
	1.31596		0.71922	2.36645
			0.432394	1.59324
			0.298802	2.29195
			1.20877	3.20234
			1.12334
			0.524634
			1.32871
			1.28617

## Sheet: Fig1L
Cell spreading at 1h (µm²)	Control	VAPA KO	VAPA KO WT	VAPA KO KDMD
	291.218	655.655	534.176	1101.63
	230.478	996.38	463.452	1724.42
	185.963	604.068	456.795	773.39
	382.743	1583.81	436.826	779.215
	328.244	453.051	664.808	528.352
	246.703	550.817	732.62	820.401
	220.909	575.779	671.464	605.732
	361.526	516.703	1372.05	885.717
	281.233	3082.33	440.154	1049.21
	353.621	482.589	1010.94	448.891
	376.919	2240.71	1074.59	1285.1
	431.002	3071.51	823.313	1016.76
	242.127	1830.09	741.357	314.931
	409.785	1433.21	1097.47	453.467
	64.9	1292.17	1677.83	1059.2
	0.832	1964.05	1201.9	484.253
	441.403	1469.82	653.575	3377.71
	294.962	1922.04	425.594	311.603
	333.652	599.492	627.366	1654.12
	234.638	467.196	961.434	284.145
	760.078	544.161	616.965	607.397
	295.794	415.193	1268.46	1146.15
	0.416	583.683	725.548	761.326
	400.632	279.569	1243.5	2444.15
	456.795	1293.01	766.318	545.825
	280.817	1750.63	788.783	2013.98
	563.298	1139.49	419.769	711.403
	220.909	1182.76	34.53	861.588
	225.07	1850.48	639.014	1480.22
	394.392	1036.32	756.333	1619.59
	331.988	515.039	498.398	2155.84
	197.612	648.583	926.072	1409.91
	266.256	416.857	1467.32	3170.11
	213.837	1932.85	496.318	1045.06
	326.996	619.045	684.361	372.342
	318.259	1347.09	382.743	420.601
	310.771	1605.44	1124.1	515.455
	364.022	646.919	1018.85	569.954
	232.558	488.413	342.805	415.193
	207.597	1069.6	694.346	608.645
	210.925	563.298	460.956	1029.66
	140.616	1019.68	693.098	879.893
	1381.2	1856.72	697.674	392.312
	322.003	913.591	579.523	885.717
	1126.6	373.174	632.774	755.085
	822.065	771.726	854.099	729.292
	1130.76	1014.27	549.569	677.289
	460.54	1619.59	353.205	335.732
	1025.09	743.437	334.9	1112.87
	368.182	570.37	378.583	1653.7
	510.047	497.15	510.047	1016.76
	577.859	340.724	415.609	773.39
	602.82	750.509	628.198	430.17
	578.691	703.082	444.731	242.543
	643.175	1362.48	599.076	505.886
	591.172	438.49	875.733	455.963
	965.178	547.489	832.051	1197.74
	1061.7	2109.66	430.17	1197.74
	401.048	629.862	541.249	518.367
	314.515	664.392	821.234	821.649
	397.304	606.98	348.213	1461.5
	538.752	1506.43	381.911	467.612
	260.016	667.304	695.594	483.837
	340.724	717.227	679.785	643.175
	305.778	418.521	393.56	823.73
	459.292	725.964	14.561	742.189
	481.341	1259.31	770.479	1300.08
	451.387	500.478	1146.15	777.967
	388.983	1162.37	1028.41	519.199
	365.686	287.889	708.075	1200.65
	342.805	822.897	695.178	568.706
	656.071	1177.35	706.827	568.706
	411.033	495.07	582.019	408.537
	527.104	1164.45	626.95	1171.94
	378.999	664.392	1074.59	427.258
	194.284	587.427	536.672	717.643
	299.122	1106.63	417.273	1715.27
	435.579	539.168	418.521	954.777
	315.347	1264.3	309.939	705.578
	515.455	698.506	351.541	770.062
	580.771	1022.59	535.008	941.465
	394.808	385.239	649.415	853.683
	389.4	1685.73	453.051	1167.37
	315.347	763.822	901.11	938.136
	345.717	479.677	466.78	816.657
	488.414	577.443	413.945	2209.93
	342.389	1660.36	460.124	1629.15
	474.269	1274.29	441.403	1233.51
	257.936	2629.28	488.413	1347.51
	503.391	584.516	814.577	608.229
	326.996	1020.93	957.274	417.273
	591.172	1781.42	1044.22	673.128
	363.606	1681.57	521.279	976.411
	589.092	383.159	609.477	663.56
	535.841	1525.98	615.301	472.604
	440.154	1425.72	605.316	866.58
	403.96	626.118	619.877	811.665
	344.469	1748.97	696.842	1102.05
	463.036	462.62	1275.12	803.344
	660.232	649.832	549.153	468.028
	440.987	438.491	443.067	1277.2
	560.386	1046.72	1933.27	2905.93
	598.244	805.841	733.452	748.013
	417.273	1781	671.88	11.649
	726.38	300.786	715.979	540
	573.698	744.269	1460.66	3029.08
	408.537	814.162	754.669	552.065
	872.404	1017.18	512.127	562.882
	404.376	931.897	1140.33	393.56
	594.5	807.921	331.572	721.803
	607.813	837.459	582.435	1953.65
	335.732	403.961	997.212	772.142
	355.285	699.339		2784.04
	438.49	1873.36		638.598
	386.903	815.826		784.623
	502.974	303.698		1365.39
		801.681		767.566
		492.574		360.278
		958.106		1769.77
		753.006		1554.27
		391.48		525.856
		1219.79		435.162
		589.092		3088.15
		641.095		2266.09
		1113.7		2088.45
		354.038		811.665
		897.783		203.436
		749.678
		1171.11
		425.594
		470.525
		687.69
		426.426
