# Supplementary material for: The ER tether VAPA is required for proper cell motility and anchors ER-PM contact sites to focal adhesions
Source: eLife journal article supplement (doi:10.7554/elife.85962), 2024-02-08

**Figure 1\_Original blots**

**Blots presented in Figure 1A**

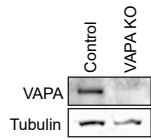

**Original blot for VAPA**

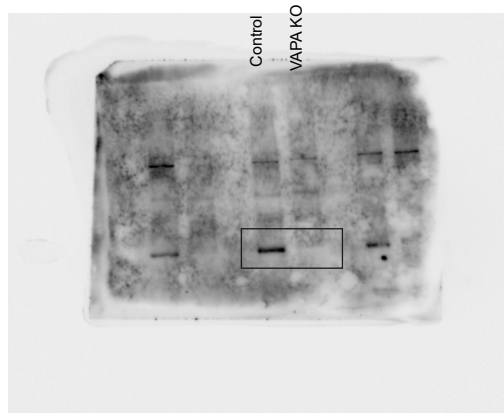

**Original blot for Tubulin**

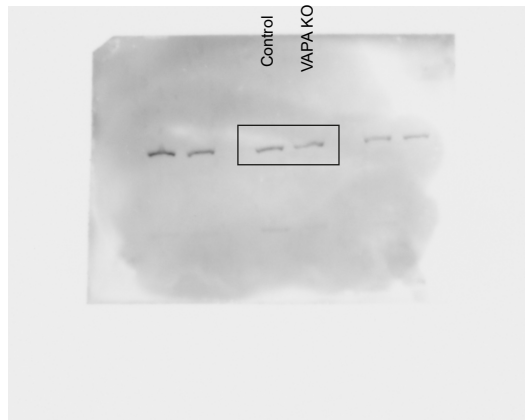

Supplement: fig1-data2 [file elife-85962-fig1-data2-v1.zip]
