# Supplementary material for: The ER tether VAPA is required for proper cell motility and anchors ER-PM contact sites to focal adhesions
Source: eLife journal article supplement (doi:10.7554/elife.85962), 2024-02-08
Supplement: fig1-figsupp1-data1 [file Figure1-figSup1.xlsx]

## Sheet: Fig1-figSup1A
Relative VAPB grey levels normalized to tubulin	Control	VAPA KO
	1	1.23
	1	2.44
	1	1.67
