# Supplementary material for: The ER tether VAPA is required for proper cell motility and anchors ER-PM contact sites to focal adhesions
Source: eLife journal article supplement (doi:10.7554/elife.85962), 2024-02-08
Supplement: fig2-data1 [file Figure2.xlsx]

## Sheet: Fig2B
Central focal adhesions area (µm²)	Control	VAPA KO	VAPA KO+Ch-VAPA	VAPA KO+Ch-VAPA KD/MD		Control	VAPA KO	VAPA KO+Ch-VAPA	VAPA KO+Ch-VAPA KD/MD
	0.234	0.512	0.456	0.764	Mean	0.278943	0.478671	0.314278	0.426256
	0.109	0.082	0.074	0.439	SEM	0.00748841	0.0147093	0.00808105	0.0121099
	0.048	1.819	2.41	0.304
	0.065	0.065	0.304	1.42
	0.187	0.551	1.394	2.453
	0.504	0.304	0.056	0.269
	0.365	1.051	0.842	0.069
	0.061	1.103	0.265	0.239
	1.138	0.043	0.256	0.208
	0.647	0.287	0.148	0.078
	0.239	0.213	0.699	0.187
	0.287	0.165	1.615	1.329
	0.161	0.508	0.074	0.104
	0.052	0.109	0.855	0.369
	0.043	0.829	0.048	0.682
	0.091	0.091	0.148	1.75
	0.056	0.265	0.208	0.082
	0.043	0.217	0.069	0.621
	0.065	0.078	0.143	0.043
	0.043	0.382	0.834	0.043
	0.13	1.203	0.078	0.061
	0.043	0.373	1.62	1.129
	0.3	0.386	0.043	0.499
	0.261	0.022	0.069	0.738
	0.048	0.708	0.677	0.369
	0.113	1.368	0.122	4.972
	0.048	0.708	0.078	1.728
	0.052	0.048	0.1	1.155
	0.048	0.256	0.135	0.76
	0.278	0.208	0.256	0.456
	0.065	0.899	0.048	1.177
	0.078	0.182	0.664	0.052
	0.174	0.126	1.663	0.999
	0.091	0.082	0.226	0.86
	0.421	0.304	0.061	0.126
	0.087	0.465	0.156	0.864
	0.174	0.122	0.087	2.249
	0.087	0.048	0.482	0.721
	0.313	0.052	1.55	0.591
	0.239	1.164	0.056	0.261
	0.048	0.152	0.135	1.242
	0.052	0.317	0.651	0.087
	0.139	0.23	0.187	0.048
	0.087	0.2	0.213	1.767
	1.003	0.365	0.165	0.048
	0.491	0.808	0.929	0.122
	0.999	1.033	0.117	0.122
	0.043	0.052	0.043	0.117
	0.881	0.043	0.161	0.378
	0.113	0.521	0.074	1.876
	0.061	2.049	0.065	0.482
	1.081	0.091	0.278	0.456
	0.104	0.048	0.091	0.087
	0.065	0.139	0.126	2.983
	0.109	1.559	0.234	0.265
	0.234	0.256	0.148	0.052
	0.391	0.113	0.069	0.56
	0.069	0.204	0.043	0.148
	0.148	0.89	2.323	0.065
	0.109	1.663	0.677	0.947
	0.195	0.078	0.043	0.056
	0.208	0.929	0.43	0.399
	0.043	1.207	0.1	0.048
	0.052	0.087	0.109	0.955
	0.465	1.177	0.082	0.308
	0.495	1.971	0.269	1.094
	0.113	0.239	0.287	0.677
	0.065	0.139	0.174	0.043
	0.065	0.352	0.278	0.048
	0.065	0.326	0.043	0.399
	0.052	1.824	0.56	1.064
	0.373	0.591	0.087	0.716
	0.113	0.269	0.504	0.091
	0.304	0.99	0.204	0.356
	0.082	1.416	0.968	0.156
	0.069	0.043	0.065	0.478
	0.139	0.069	0.139	0.326
	0.048	1.198	0.061	0.069
	0.043	0.052	0.13	2.032
	0.308	0.13	0.052	0.977
	0.082	0.247	0.065	0.082
	0.043	0.043	0.104	1.546
	0.048	1.646	0.608	0.365
	0.087	0.543	0.074	0.069
	0.091	1.281	0.087	1.932
	0.617	0.447	0.104	0.373
	0.104	2.479	0.313	0.23
	0.052	0.061	0.113	1.311
	0.113	7.811	0.169	0.091
	0.399	0.942	0.052	2.314
	0.082	1.759	0.043	0.13
	0.1	0.825	0.078	0.043
	0.221	0.217	0.096	0.53
	0.061	0.256	0.352	0.938
	0.052	8.041	0.452	0.656
	0.265	0.078	0.13	0.239
	0.052	0.599	0.1	0.13
	0.161	0.1	0.191	0.065
	0.256	0.113	0.165	1.819
	0.109	0.052	0.043	0.673
	0.052	0.191	0.782	0.096
	0.069	0.048	0.191	0.599
	0.056	0.117	0.052	0.043
	0.056	0.365	0.465	0.043
	0.161	0.122	0.795	1.728
	0.061	0.326	0.191	0.986
	0.152	0.043	1.424	0.239
	0.052	0.165	0.135	0.512
	0.096	0.569	0.117	0.999
	0.056	0.148	0.139	0.13
	0.104	1.633	0.065	0.278
	0.113	0.86	0.195	0.226
	0.104	1.099	0.052	0.617
	0.078	0.109	0.078	0.122
	0.096	0.091	0.061	0.082
	0.061	0.052	0.534	1.98
	0.082	0.347	0.056	1.355
	0.069	0.2	1.481	0.187
	0.109	1.042	0.043	0.113
	0.082	0.304	0.113	0.156
	0.087	0.065	0.113	0.208
	0.052	0.404	0.087	0.122
	0.152	0.043	0.243	0.1
	0.087	0.23	0.122	0.117
	0.278	0.247	0.243	0.63
	0.056	0.087	0.074	1.229
	0.395	0.187	0.234	2.857
	0.161	0.399	0.087	0.538
	0.065	0.169	0.148	0.117
	0.122	0.46	0.278	0.061
	0.087	0.043	0.187	0.048
	0.313	0.69	0.078	0.786
	0.048	0.195	0.048	0.139
	0.117	0.434	0.043	0.174
	0.165	0.139	0.087	0.347
	0.1	0.365	0.048	0.282
	0.056	3.73	0.104	0.091
	0.109	2.866	0.056	1.706
	0.082	0.782	0.408	1.945
	0.13	1.02	0.204	0.738
	0.161	0.061	0.074	0.078
	0.143	0.239	0.104	0.069
	0.117	2.861	0.096	1.745
	0.087	0.399	0.043	1.216
	0.226	0.082	0.104	0.165
	0.117	0.139	0.221	1.129
	0.126	0.043	0.343	0.135
	0.078	0.23	0.122	0.352
	0.043	0.069	0.078	0.048
	0.1	0.096	0.052	0.591
	0.043	0.048	0.178	0.456
	0.048	0.082	0.048	0.339
	0.282	0.13	0.109	0.174
	0.069	0.486	0.061	0.703
	0.23	0.156	0.243	0.091
	0.048	0.187	0.048	0.586
	0.082	0.091	0.156	1.168
	0.269	0.061	0.221	0.13
	0.082	0.274	0.061	0.274
	0.096	0.122	0.378	0.651
	0.139	0.447	0.117	0.36
	0.078	0.048	0.082	1.072
	0.269	0.174	0.087	0.443
	0.043	0.117	0.069	0.816
	0.122	0.061	0.061	0.096
	0.252	0.104	0.096	0.564
	0.052	0.534	0.586	0.056
	0.056	0.061	0.169	0.061
	0.061	0.326	0.317	1.224
	0.043	0.122	0.243	0.543
	0.113	0.13	0.117	0.074
	0.256	0.247	1.242	0.708
	0.078	0.122	0.139	0.79
	0.082	0.091	0.078	0.886
	0.043	0.052	0.391	0.247
	0.23	0.069	0.065	0.408
	0.056	0.482	0.065	0.226
	0.156	0.1	0.382	0.087
	0.087	0.586	0.2	0.056
	0.069	0.404	0.287	0.226
	0.043	0.069	0.829	0.378
	0.135	0.834	0.113	0.139
	0.078	0.139	0.538	0.334
	0.056	0.204	0.069	0.082
	0.117	0.395	0.929	0.043
	0.048	1.155	0.078	0.148
	0.122	1.481	0.074	0.417
	0.096	0.122	0.152	0.825
	0.052	0.061	0.113	0.078
	0.091	1.324	0.048	0.278
	0.056	0.577	0.056	0.043
	0.287	0.087	0.135	0.135
	0.174	0.538	0.66	0.122
	0.569	0.252	0.056	0.417
	0.148	0.434	0.043	0.187
	0.096	1.78	0.1	0.868
	0.048	0.148	0.048	0.421
	0.156	0.135	0.43	1.767
	0.074	0.195	0.091	0.096
	0.078	0.617	0.156	0.412
	0.065	2.314	0.126	1.819
	0.056	2.818	0.061	0.816
	0.087	0.326	0.091	0.139
	0.096	0.617	0.148	0.217
	0.043	0.756	0.078	0.204
	0.074	0.443	0.117	0.161
	0.143	0.078	0.126	0.304
	0.048	0.69	0.065	0.122
	0.096	0.465	0.117	0.143
	0.074	0.369	0.13	0.043
	0.074	0.13	0.139	2.227
	0.056	1.624	0.082	0.104
	0.117	0.643	0.165	0.777
	0.056	0.261	0.043	0.043
	0.1	0.577	0.065	0.313
	0.078	0.434	0.109	0.304
	0.078	0.99	0.056	0.048
	0.126	0.43	0.152	0.139
	0.082	0.061	0.069	0.586
	0.113	0.096	0.13	1.207
	0.091	0.465	0.295	0.061
	0.182	1.611	0.2	0.056
	0.347	0.782	0.122	0.287
	0.069	0.174	0.087	0.512
	0.187	0.673	0.087	0.326
	0.122	1.637	0.052	0.2
	0.052	3.756	0.048	1.064
	0.326	0.043	1.046	0.208
	0.087	1.798	0.326	0.239
	0.247	0.729	0.096	1.033
	0.2	1.476	0.226	0.143
	0.208	0.742	0.439	0.069
	0.247	0.048	0.087	0.695
	0.265	0.082	0.048	0.052
	0.065	0.308	0.178	0.048
	0.187	0.951	0.078	0.695
	0.065	2.762	0.096	0.834
	0.313	0.056	0.195	0.074
	0.065	0.126	0.261	0.152
	0.156	0.426	0.078	0.043
	0.043	0.951	0.33	0.365
	0.065	2.162	0.096	0.439
	0.043	0.1	0.938	0.052
	0.564	0.043	0.304	0.087
	0.061	0.538	0.13	0.048
	0.091	0.274	0.056	0.287
	0.174	0.169	0.178	0.821
	0.056	6.048	0.052	1.819
	0.143	0.061	0.052	1.411
	0.048	0.208	0.048	1.129
	0.104	0.087	0.043	1.355
	0.13	0.043	0.087	0.703
	0.126	0.087	0.169	0.599
	0.161	0.221	0.391	0.043
	0.208	0.143	0.2	0.517
	0.056	1.481	0.247	0.065
	0.061	0.113	5.336	0.143
	0.065	2.032	0.217	0.043
	0.278	0.96	0.082	0.104
	0.261	0.048	0.999	0.508
	0.078	1.303	0.056	0.742
	0.061	0.36	0.061	0.382
	0.048	1.554	0.082	0.139
	0.065	0.317	0.043	0.074
	0.156	2.644	0.052	0.191
	0.113	0.174	0.126	0.334
	0.065	0.53	0.074	0.673
	0.048	0.056	0.321	0.109
	0.135	1.78	0.617	0.126
	0.187	1.32	0.052	0.686
	0.113	0.056	0.056	0.048
	0.386	0.065	0.061	0.061
	0.109	0.582	0.412	0.317
	0.139	0.13	0.621	1.333
	0.048	0.265	0.391	0.252
	0.126	0.087	0.165	0.065
	0.082	0.304	0.113	0.577
	0.074	0.182	0.751	0.716
	0.109	4.607	0.056	0.078
	0.043	0.2	0.113	0.182
	0.208	0.239	0.052	0.174
	0.082	0.456	0.043	0.043
	0.074	0.899	0.091	0.782
	0.065	0.109	0.069	0.269
	0.048	0.421	0.048	0.043
	0.061	0.291	0.043	0.087
	0.234	1.524	0.152	1.194
	0.096	0.378	0.048	0.109
	0.082	0.187	0.052	1.038
	0.165	0.052	0.043	0.069
	0.122	0.447	0.052	0.243
	0.187	0.065	0.256	0.161
	0.13	0.217	0.052	0.074
	0.178	0.074	0.065	0.043
	0.156	0.491	0.043	0.499
	0.135	0.087	1.307	0.282
	0.152	0.391	0.651	0.669
	0.061	0.069	0.048	1.033
	0.191	0.056	0.061	0.082
	0.096	0.499	0.165	0.065
	0.074	0.13	0.122	0.756
	0.074	0.907	0.156	0.899
	0.295	0.564	0.043	0.951
	0.056	0.069	0.052	0.321
	0.113	0.069	0.056	0.261
	0.104	0.3	1.294	1.09
	0.069	0.96	0.069	0.069
	0.113	0.816	0.065	0.078
	0.152	0.573	0.043	0.091
	0.056	0.556	0.056	2.332
	0.061	0.508	1.177	0.078
	0.056	0.052	0.052	1.138
	0.109	0.99	0.052	0.139
	0.091	0.048	0.864	1.772
	0.165	0.056	0.347	1.038
	0.048	1.715	0.074	0.052
	0.069	1.672	0.256	1.706
	0.096	0.082	0.152	0.356
	0.043	1.077	0.052	0.152
	0.048	0.204	0.078	0.53
	0.043	0.256	0.069	0.078
	0.048	0.152	0.048	0.339
	0.043	1.177	0.048	0.951
	0.078	0.048	0.096	0.048
	0.043	0.065	0.052	0.399
	0.782	0.252	0.061	0.052
	0.052	2.123	0.386	0.074
	0.056	2.058	0.065	0.187
	0.178	0.139	0.109	1.19
	0.226	0.069	1.641	0.082
	0.981	1.363	0.074	0.104
	0.504	0.608	0.043	0.074
	0.143	0.122	0.729	0.304
	1.294	0.061	0.043	0.777
	0.43	0.043	0.043	0.152
	0.13	1.086	0.043	0.295
	0.256	1.533	0.056	0.534
	0.174	3.07	0.048	0.894
	0.204	0.061	0.135	1.099
	0.043	0.043	0.595	0.065
	0.76	1.524	0.113	0.604
	0.295	0.056	0.109	0.056
	0.395	0.543	0.1	0.087
	0.078	0.543	0.069	0.278
	0.226	0.13	0.078	0.343
	0.065	0.061	0.048	0.048
	0.347	2.197	0.634	0.13
	0.165	2.427	0.056	0.074
	0.517	2.102	0.061	0.043
	0.395	2.019	0.087	0.221
	0.148	0.417	0.182	0.043
	0.052	0.182	0.043	0.221
	0.734	4.012	0.052	0.056
	0.148	0.087	0.061	0.36
	0.287	0.069	0.217	0.078
	0.234	0.339	0.061	0.091
	0.608	0.122	0.096	0.13
	0.043	2.01	0.048	0.721
	0.365	0.152	0.126	0.221
	0.352	0.043	0.048	0.734
	0.864	0.052	0.569	0.109
	0.925	0.061	0.096	0.056
	0.061	0.052	0.234	0.052
	0.048	0.065	0.117	0.096
	0.117	0.113	0.082	0.043
	0.23	0.247	0.043	0.191
	0.764	1.863	0.043	0.052
	0.243	0.825	0.082	0.947
	0.061	0.152	0.052	0.256
	0.052	0.122	0.074	0.408
	0.269	0.1	0.052	0.734
	0.122	0.056	0.069	0.221
	0.265	0.052	0.278	0.317
	0.109	0.79	0.808	0.048
	0.161	0.061	0.061	0.048
	0.334	1.181	0.078	0.087
	0.664	0.043	0.052	2.006
	0.048	0.304	0.056	1.876
	0.082	0.213	0.208	0.13
	0.825	0.091	1.876	0.386
	0.052	0.977	0.573	1.437
	0.061	7.59	0.087	0.043
	0.291	1.455	0.074	3.304
	0.243	0.156	0.174	0.551
	0.213	0.048	0.043	0.261
	1.342	0.452	0.1	1.255
	0.061	0.043	0.048	0.1
	0.221	0.386	0.056	0.052
	0.295	0.122	0.408	6.426
	0.061	0.048	0.087	0.109
	0.573	0.052	0.082	0.052
	0.061	0.525	0.265	0.043
	0.043	0.66	0.404	0.213
	0.504	0.043	0.148	0.343
	0.087	0.343	0.234	1.741
	0.243	0.087	0.3	0.612
	0.082	0.048	0.074	0.395
	0.169	0.069	0.065	0.191
	0.291	1.607	0.117	0.091
	0.287	0.247	0.2	0.604
	0.065	0.096	0.048	0.217
	0.408	0.382	0.269	1.355
	0.886	0.065	0.061	0.769
	0.043	0.061	0.061	0.339
	0.339	0.087	0.052	0.061
	0.065	0.1	0.321	0.174
	0.043	0.056	0.13	0.208
	0.061	0.864	0.065	0.109
	0.056	0.886	0.048	0.399
	0.313	0.165	0.673	0.056
	0.048	0.161	0.53	0.117
	0.3	0.161	0.182	0.082
	0.048	0.391	0.065	0.113
	0.247	1.046	0.247	0.89
	0.486	0.126	0.313	0.647
	0.182	0.734	0.065	0.247
	0.069	2.51	0.486	0.816
	0.135	0.686	0.043	1.007
	0.065	0.912	0.048	0.091
	0.056	0.117	0.161	0.968
	0.078	0.23	0.082	0.543
	0.308	0.378	1.52	0.074
	0.056	0.234	1.12	0.373
	0.148	0.061	0.052	2.64
	0.104	0.287	0.069	1.09
	0.143	0.087	0.152	0.182
	0.104	0.321	0.052	0.386
	0.065	0.091	0.043	0.195
	0.321	0.087	0.087	0.213
	0.204	0.221	0.617	1.112
	0.043	0.373	0.074	1.086
	0.417	0.174	0.165	0.417
	0.069	0.447	0.213	0.096
	0.382	1.29	0.043	0.148
	0.126	0.221	0.048	0.3
	0.23	0.243	0.048	0.117
	0.082	0.065	0.161	0.074
	0.082	1.038	0.1	9.053
	0.043	0.113	0.525	0.135
	0.148	0.061	0.056	3.747
	0.165	0.404	0.143	0.091
	0.742	2.21	0.043	0.069
	0.056	0.465	0.508	0.156
	0.165	0.061	0.252	0.056
	0.074	0.36	0.169	0.234
	0.221	0.213	0.056	2.814
	0.152	0.091	0.182	0.091
	0.043	6.135	0.048	0.243
	0.056	0.135	0.104	0.065
	0.903	0.617	0.612	0.508
	0.13	0.152	0.756	1.659
	0.043	0.061	0.247	0.056
	0.104	0.152	0.056	0.386
	0.043	0.239	0.208	0.512
	0.269	0.63	0.078	0.23
	0.148	0.052	0.161	2.887
	0.087	0.056	0.048	0.821
	0.13	0.304	0.087	0.048
	0.074	0.056	0.126	3.395
	1.472	0.074	0.148	0.043
	0.217	0.052	0.161	4.533
	0.174	0.113	0.139	0.182
	0.056	0.056	0.104	0.135
	0.213	0.213	0.052	2.527
	0.1	0.091	0.43	0.122
	0.143	0.043	0.056	0.074
	0.056	0.052	0.056	0.113
	0.096	0.234	0.043	0.078
	0.043	0.226	0.174	0.065
	0.096	0.951	0.213	3.222
	1.151	0.673	0.373	0.043
	0.061	0.069	0.491	0.282
	0.048	0.821	0.547	0.069
	0.069	0.043	0.135	0.065
	0.048	0.048	0.282	0.63
	1.029	0.174	0.291	3.157
	0.143	0.1	0.061	0.082
	0.217	0.239	0.178	2.445
	0.3	0.313	0.043	0.078
	0.617	0.955	0.217	1.607
	0.256	0.169	0.169	0.052
	0.074	0.043	0.065	1.976
	0.056	0.104	0.491	1.667
	0.048	0.239	0.117	0.082
	0.069	2.644	0.313	1.993
	0.395	0.569	0.169	0.569
	0.091	0.213	0.091	2.397
	0.126	1.433	0.803	0.955
	0.295	0.508	0.53	0.556
	0.404	0.256	0.178	1.099
	0.239	0.751	0.313	0.399
	0.074	0.082	0.352	0.703
	0.334	1.463	0.043	0.082
	0.052	0.404	0.113	0.886
	0.139	0.23	0.061	4.472
	0.069	0.109	0.113	0.439
	0.061	0.326	0.074	0.056
	0.048	0.048	0.043	1.038
	0.065	0.113	0.656	0.808
	0.069	0.061	0.061	0.877
	0.122	0.443	0.243	0.056
	0.126	0.104	0.069	0.478
	0.069	2.041	1.233	0.638
	0.165	0.048	0.056	0.417
	0.187	0.139	1.45	0.061
	0.234	0.656	0.052	0.569
	0.608	0.069	0.043	3.044
	0.109	0.169	0.091	0.143
	0.113	0.217	0.99	1.168
	0.087	1.368	0.082	0.738
	0.069	0.504	0.2	1.155
	0.139	0.226	0.078	1.264
	0.143	0.048	0.078	0.043
	1.068	0.109	0.065	0.308
	0.508	0.834	0.165	1.828
	0.269	0.065	0.643	0.452
	0.66	0.074	0.056	0.109
	0.091	0.052	0.061	2.062
	0.195	0.082	0.048	0.347
	0.23	0.056	0.056	0.261
	0.79	1.611	0.113	0.156
	0.104	2.523	0.048	1.533
	0.087	0.156	0.087	0.677
	0.065	0.881	0.378	0.104
	0.052	0.604	0.1	1.303
	0.139	0.96	0.069	0.951
	0.595	0.187	0.117	1.125
	0.117	0.864	0.096	0.23
	1.685	0.061	0.043	0.795
	0.043	0.182	0.96	0.048
	0.508	0.1	0.078	0.873
	1.285	0.096	0.182	0.877
	0.742	0.352	0.048	0.512
	0.504	0.065	0.334	0.373
	0.091	0.069	0.478	1.09
	0.378	0.048	0.061	0.508
	0.439	0.13	1.476	1.086
	0.282	0.378	0.404	0.682
	0.117	0.973	0.165	0.695
	0.074	0.187	0.052	0.074
	0.46	0.052	0.343	1.394
	1.159	0.043	0.074	0.1
	1.481	0.056	0.169	1.637
	0.69	0.304	0.048	0.569
	0.065	0.973	0.048	0.417
	0.061	1.637	0.043	0.404
	0.165	0.052	0.069	0.708
	0.399	0.074	0.66	1.272
	1.472	0.478	0.109	1.463
	0.816	0.087	0.056	0.79
	0.148	0.426	0.048	0.317
	0.043	0.104	6.018	0.308
	0.048	0.074	0.065	0.669
	0.065	0.721	0.065	0.265
	0.365	0.182	0.056	0.829
	0.395	0.069	0.265	2.306
	0.226	0.191	0.821	0.122
	0.052	0.382	0.082	1.437
	1.012	0.087	0.1	0.113
	0.082	0.135	0.087	1.363
	0.061	0.056	0.135	0.812
	0.148	0.747	0.1	0.065
	0.13	0.091	0.043	2.21
	0.1	0.178	0.078	0.217
	0.078	0.065	0.521	0.313
	0.148	0.169	0.087	0.178
	0.043	0.109	0.269	0.287
	0.213	0.234	0.829	0.1
	1.589	0.048	0.525	0.465
	0.056	0.152	0.23	1.35
	0.139	0.269	2.045	0.109
	0.043	0.109	0.465	0.169
	0.1	0.096	0.816	1.394
	0.126	0.069	0.226	0.122
	0.069	0.834	1.086	0.182
	1.772	0.195	0.386	0.295
	0.078	0.13	0.365	0.226
	1.12	0.265	0.426	0.195
	0.122	0.043	0.499	0.13
	0.13	0.287	0.091	1.693
	0.369	0.048	0.169	0.217
	0.339	0.048	0.208	0.174
	0.113	0.087	0.369	1.016
	0.13	0.109	0.187	0.117
	0.048	0.048	2.167	0.243
	0.274	0.061	0.052	0.078
	0.769	0.069	0.382	0.625
	0.838	0.304	0.265	0.608
	0.148	0.069	0.365	0.3
	0.109	0.061	0.543	0.517
	0.174	0.955	0.174	0.499
	0.048	0.087	0.252	0.056
	0.082	0.221	0.968	0.122
	1.624	0.061	0.182	0.069
	0.33	0.043	0.091	0.187
	0.087	0.048	0.703	0.078
	0.135	0.195	0.773	0.074
	0.117	0.221	0.043	0.521
	0.048	0.061	0.104	0.135
	0.061	0.169	0.043	0.399
	0.056	0.1	0.482	0.139
	0.043	0.043	0.043	0.226
	0.165	1.116	0.421	0.065
	0.043	0.074	0.247	1.277
	0.048	0.078	1.594	0.052
	0.091	0.078	0.126	0.747
	0.091	0.061	0.126	0.061
	2.488	0.043	2.366	0.208
	0.217	0.091	0.686	0.043
	0.117	0.052	0.126	2.075
	0.061	0.069	0.213	0.204
	0.287	0.048	0.043	0.043
	0.139	0.135	0.052	0.043
	0.043	0.13	0.087	0.247
	0.321	0.109	0.443	0.326
	0.195	0.065	0.682	0.265
	1.672	0.074	0.365	0.426
	0.056	0.048	1.572	0.3
	0.152	0.078	0.261	0.269
	0.643	0.043	0.534	0.148
	0.725	0.069	0.082	0.043
	0.725	0.052	1.129	1.828
	0.356	0.074	0.074	0.052
	0.46	0.36	0.321	0.195
	0.082	0.043	0.295	0.056
	0.061	0.078	2.236	0.052
	0.065	0.096	0.061	0.065
	0.243	0.152	0.221	0.447
	0.161	0.148	0.109	0.234
	0.365	0.065	0.356	0.117
	0.069	0.052	0.221	0.339
	0.043	0.069	0.043	0.052
	0.069	0.048	0.2	0.617
	0.829	0.339	0.1	0.352
	0.078	0.117	0.721	0.36
	0.274	0.052	0.13	0.069
	1.711	0.096	0.3	0.764
	0.048	0.056	0.052	0.148
	0.043	0.1	0.352	0.152
	0.078	0.313	0.048	0.386
	0.252	0.143	0.061	0.061
	0.343	0.213	0.048	0.317
	0.078	0.043	0.056	0.977
	0.043	0.113	0.156	0.109
	0.148	0.104	0.139	0.287
	0.217	0.061	0.061	0.564
	0.443	0.043	0.195	0.052
	0.061	0.143	0.087	0.508
	0.048	0.113	0.061	0.082
	0.269	0.139	0.495	1.798
	0.204	0.074	0.643	0.065
	0.261	0.169	0.156	0.551
	0.104	0.065	0.074	0.304
	0.252	0.048	0.369	1.051
	0.061	0.056	0.182	1.103
	0.082	0.113	0.769	0.043
	0.117	0.252	0.087	0.287
	0.968	0.721	0.061	0.213
	0.191	0.082	0.043	0.165
	0.069	0.373	1.033	0.508
	0.534	0.269	0.291	0.109
	0.573	0.052	0.078	0.829
	0.604	0.052	0.113	0.091
	0.074	0.065	3.092	0.265
	0.1	0.065	0.043	0.217
	0.855	0.161	0.278	0.078
	0.161	0.56	1.767	0.382
	0.165	0.043	0.512	1.203
	0.048	0.135	0.043	0.373
	0.104	0.334	0.1	0.76
	0.143	0.482	0.061	0.065
	0.065	0.065	0.252	0.708
	0.208	0.052	0.295	1.355
	0.126	0.161	0.061	0.708
	0.135	0.043	0.23	0.048
	0.174	1.155	0.052	0.256
	0.261	0.148	0.048	0.208
	1.264	0.156	0.226	0.899
	0.725	0.117	0.048	0.182
	0.369	0.156	0.074	0.126
	0.069	0.53	0.048	0.082
	0.295	0.33	3.131	0.304
	0.148	0.135	0.208	0.465
	0.247	0.638	2.162	0.122
	0.547	0.269	0.174	0.048
	0.135	0.117	1.624	0.052
	0.278	2.206	0.048	1.164
	0.829	0.048	0.043	0.152
	0.217	0.113	0.378	0.317
	0.352	0.122	0.048	0.23
	0.069	0.122	0.204	0.2
	1.042	0.399	0.369	0.365
	0.187	1.511	0.117	0.808
	2.319	0.156	0.169	1.033
	0.096	0.078	0.499	0.052
	0.174	0.152	0.399	0.043
	0.148	1.728	0.156	0.521
	0.1	0.122	0.056	2.045
	0.061	0.065	0.043	0.091
	0.564	0.117	0.065	0.048
	0.061	0.056	0.1	0.139
	0.052	0.365	0.135	1.559
	0.217	0.104	0.043	0.256
	0.148	0.074	0.052	0.113
	0.669	0.065	0.621	0.204
	0.378	0.135	1.376	0.89
	0.404	0.174	0.061	1.663
	1.099	0.135	0.052	0.078
	0.043	0.048	0.239	0.929
	1.259	0.069	0.187	1.207
	0.143	0.056	0.056	0.087
	0.86	0.069	0.065	1.177
	0.825	0.135	0.052	1.971
	0.139	0.113	0.178	0.239
	0.078	0.161	0.048	0.139
	0.061	0.082	0.048	0.352
	0.091	0.195	0.078	0.317
	0.104	0.126	0.043	1.824
	0.33	0.043	0.517	0.591
	0.048	0.135	0.386	0.269
	0.282	0.048	0.056	0.99
	0.078	0.109	0.139	1.407
	0.1	0.078	0.056	0.043
	0.117	0.313	0.135	0.069
	0.091	0.061	0.169	1.198
	0.178	0.052	2.032	0.052
	0.386	0.165	0.048	0.13
	0.208	0.551	0.056	0.239
	0.104	0.326	0.048	0.043
	0.295	0.074	0.087	1.646
	0.365	0.061	0.117	0.543
	0.478	0.065	0.109	1.281
	0.1	0.156	0.126	0.447
	0.182	0.113	1.954	2.479
	0.408	0.082	0.178	0.061
	0.213	0.052	0.056	7.803
	0.069	0.174	0.074	0.942
	0.56	0.091	0.321	1.745
	0.178	0.052	0.091	0.825
	0.139	0.087	0.052	0.217
	0.317	0.056	0.052	0.256
	0.074	0.065	0.052	7.781
	0.065	0.313	0.621	0.078
	0.104	0.056	0.426	0.599
	0.109	0.052	0.043	0.1
	0.187	0.291	0.065	0.113
	0.682	0.139	0.096	0.052
	0.074	0.061	0.069	0.191
	0.065	0.499	0.113	0.048
	0.056	0.069	0.082	0.117
	0.096	0.195	0.122	0.365
	0.178	0.365	0.135	0.122
	0.408	0.056	0.052	0.326
	0.091	0.408	0.847	0.043
	0.069	2.384	0.304	0.165
	0.161	0.161	0.178	0.569
	1.489	2.484	0.043	0.148
	0.143	0.13	0.109	1.624
	0.065	0.634	0.252	0.86
	0.217	0.465	0.847	1.099
	0.716	0.656	0.161	0.109
	0.399	0.139	0.074	0.091
	0.074	0.178	0.621	0.052
	0.239	1.242	0.156	0.347
	0.091	0.113	0.043	0.2
	0.13	0.156	0.048	1.042
	0.113	0.182	0.061	0.304
	0.365	0.534	0.043	0.065
	0.221	0.148	0.113	0.404
	0.065	0.304	0.056	0.043
	0.851	0.122	0.139	0.23
	0.582	4.681	0.109	0.247
	0.078	0.699	0.608	0.087
	0.104	0.165	0.087	0.187
	0.096	1.142	0.169	0.399
	0.069	0.126	0.056	0.169
	0.126	0.569	0.399	0.46
	0.078	0.317	0.052	0.043
	0.213	0.169	0.999	0.69
	0.152	0.139	0.043	0.195
	0.326	0.135	0.056	0.434
	0.135	1.329	0.043	0.139
	0.89	0.109	0.048	0.365
	0.226	0.143	0.243	3.73
	0.074	0.669	0.456	2.848
	2.349	0.161	0.117	0.782
	0.239	0.317	0.061	1.016
	1.155	0.117	0.043	0.061
	0.143	0.191	0.764	0.239
	0.082	0.226	0.135	2.861
	0.304	0.122	3.717	0.399
	0.777	0.213	0.061	0.082
	0.2	1.112	0.091	0.139
	0.087	2.866	0.182	0.043
	0.148	4.52	0.135	0.23
	0.517	0.161	0.074	0.069
	0.065	0.968	0.929	0.113
	0.078	0.343	0.061	0.139
	0.23	0.161	0.048	0.069
	0.143	0.343	0.104	0.109
	0.091	0.113	0.052	0.069
	0.43	0.23	0.074	0.13
	0.087	0.252	0.104	0.369
	0.195	0.577	0.043	0.056
	0.274	1.311	0.048	0.048
	0.1	0.777	0.334	0.052
	0.76	5.831	0.082	0.109
	0.087	0.191	0.052	0.065
	0.777	0.439	0.061	0.308
	0.213	0.239	0.074	0.078
	0.278	0.573	0.082	0.117
	0.447	1.32	0.156	0.56
	0.091	0.261	0.043	0.109
	0.343	0.907	0.052	0.577
	0.104	0.33	0.061	0.104
	0.065	1.567	0.048	0.252
	0.786	0.504	0.174	0.339
	0.777	1.22	0.1	0.1
	0.682	2.288	0.234	1.099
	0.139	0.247	0.165	0.148
	0.065	0.139	0.208	0.855
	0.091	0.122	0.061	0.291
	0.265	0.139	0.139	0.334
	0.326	0.412	0.13	0.082
	0.126	0.729	0.056	1.033
	0.295	0.308	1.919	0.152
	0.135	0.308	1.033	0.117
	0.156	0.43	0.078	0.716
	0.087	0.586	0.126	0.139
	0.234	0.399	0.352	0.23
	0.078	2.475	0.043	0.239
	0.243	1.055	0.061	0.269
	0.069	0.122	0.191	1.064
	0.2	0.373	0.187	0.421
	0.239	1.793	0.165	0.36
	0.104	0.143	0.043	0.104
	0.109	0.486	0.056	0.052
	0.734	0.426	1.268	0.208
	0.313	0.973	0.165	0.065
	0.756	0.135	0.048	0.087
	0.069	0.182	0.061	0.113
	0.586	0.122	0.096	0.378
	0.069	0.148	0.056	0.096
	0.104	0.174	0.148	0.317
	0.421	0.278	0.052	0.538
	0.078	0.421	0.091	0.091
	0.087	0.261	0.113	2.349
	0.191	0.812	0.247	0.043
	0.36	0.195	0.043	1.576
	0.104	0.795	0.048	1.22
	0.213	1.033	0.052	2.045
	0.365	0.412	0.117	1.546
	0.135	0.23	0.152	1.051
	0.078	0.139	0.165	1.524
	0.699	0.156	0.682	0.104
	0.065	0.252	0.056	0.816
	1.051	1.55	2.045	0.261
	0.087	0.126	0.052	0.152
	0.113	0.126	0.048	0.078
	3.157	0.217	0.452	0.113
	0.087	0.13	0.082	1.068
	0.126	0.13	0.104	0.135
	0.109	0.391	0.052	0.512
	0.178	0.169	2.006	2.358
	0.078	0.143	0.165	0.239
	0.143	0.148	0.204	0.104
	0.117	0.161	0.126	0.669
	0.074	1.624	0.074	0.543
	0.148	0.143	0.456	0.109
	0.247	0.287	0.1	0.604
	0.113	0.247	0.061	0.521
	0.074	0.456	0.395	0.13
	0.069	0.56	0.043	1.359
	0.082	0.604	0.126	0.078
	0.065	0.968	0.169	1.372
	0.174	0.226	0.043	1.628
	0.096	0.3	0.074	0.061
	0.078	0.113	0.069	0.217
	0.178	1.928	0.243	0.052
	0.113	0.239	2.97	0.043
	0.074	0.434	0.069	0.829
	0.13	0.282	0.595	4.867
	0.191	3.539	0.109	0.065
	0.143	0.352	0.347	0.434
	0.069	0.13	0.33	0.135
	0.226	0.343	0.043	0.217
	0.686	1.133	0.069	0.508
	0.065	0.126	0.096	0.052
	0.148	0.117	0.143	1.359
	0.339	0.23	0.916	0.074
	0.109	0.33	0.052	0.113
	0.078	0.139	0.113	0.139
	0.148	0.113	0.217	5.058
	0.156	0.525	0.043	0.439
	0.117	0.217	0.091	1.858
	0.117	0.347	0.096	0.139
	0.291	0.208	0.078	0.443
	0.074	0.3	0.043	0.686
	0.156	0.239	0.921	0.89
	0.295	4.142	0.174	0.113
	0.534	0.148	0.043	0.1
	0.082	0.139	0.604	0.043
	0.195	0.187	1.442	1.585
	0.148	0.139	0.061	0.399
	0.161	0.404	0.625	0.36
	0.087	0.113	0.048	0.504
	0.182	0.113	0.234	0.143
	0.169	0.591	0.061	0.182
	0.1	0.343	0.143	0.161
	0.065	0.326	0.204	0.247
	0.091	0.274	0.308	0.091
	0.256	0.152	1.298	0.087
	0.274	0.226	0.074	0.065
	0.482	0.265	0.247	1.91
	0.104	0.934	0.452	0.043
	0.139	0.278	1.476	0.178
	0.143	0.591	0.087	0.078
	0.208	0.256	0.117	1.038
	0.13	0.204	0.343	0.043
	0.113	2.049	0.282	0.148
	0.065	0.656	0.069	0.443
	0.069	2.722	0.1	0.1
	0.226	0.334	1.051	1.22
	0.204	0.278	0.069	0.091
	0.104	0.182	0.2	0.308
	0.104	0.295	0.1	0.677
	0.096	0.087	0.087	0.178
	0.725	0.135	0.061	0.447
	0.412	0.226	0.043	0.061
	0.082	0.1	0.056	0.33
	0.139	0.074	0.078	1.168
	0.469	0.304	0.456	0.23
	0.143	0.052	0.182	0.426
	0.291	0.104	0.135	0.135
	0.069	0.109	0.577	0.265
	0.1	0.052	0.365	0.573
	0.556	0.052	0.091	0.243
	0.069	0.165	0.421	0.213
	0.096	0.165	0.135	0.165
	0.13	0.048	0.751	0.148
	0.091	0.208	0.122	0.174
	0.139	0.082	0.113	0.113
	0.33	0.065	0.313	0.109
	0.426	0.087	0.1	0.877
	2.749	0.113	0.117	0.221
	0.126	0.148	0.069	0.113
	0.096	0.109	0.087	0.643
	0.256	0.109	0.213	0.1
	0.148	0.408	0.1	0.122
	0.282	0.408	0.065	0.291
	0.1	0.569	0.122	0.382
	0.078	0.065	0.069	0.226
	0.79	0.977	0.043	0.082
	0.148	0.043	0.252	0.508
	0.756	0.069	0.052	0.109
	0.122	0.543	0.074	0.104
	0.373	0.152	0.069	0.656
	0.065	0.104	0.052	0.408
	0.135	0.087	0.156	0.773
	0.169	0.091	0.213	0.66
	0.204	0.078	0.048	0.069
	0.187	0.087	0.1	0.261
	0.065	0.638	0.356	0.082
	0.109	0.104	0.122	0.182
	0.256	0.156	0.082	0.304
	1.177	0.087	0.048	0.313
	0.082	0.113	0.517	0.078
	0.1	0.751	0.065	0.291
	0.313	0.109	0.074	0.187
	0.452	0.052	2.618	0.339
	0.452	0.169	0.043	0.217
	0.165	0.43	0.256	1.489
	0.148	0.043	0.056	0.504
	0.13	0.087	0.043	0.082
	0.182	0.109	0.048	0.182
	0.139	0.122	0.139	0.1
	0.104	0.278	0.69	0.178
	0.135	0.182	0.156	0.104
	0.308	0.174	0.113	0.078
	0.208	0.777	0.204	0.065
	1.203	0.638	0.148	0.096
	0.538	0.061	0.078	0.148
	0.074	0.161	0.091	0.178
	0.156	0.213	0.069	0.074
	0.087	0.148	0.078	0.161
	0.373	0.756	0.352	0.069
	0.169	0.126	1.125	0.282
	0.373	0.682	0.052	0.356
	0.339	1.316	0.078	0.052
	0.117	0.061	0.122	1.164
	0.069	0.056	0.252	0.334
	0.139	0.052	0.365	0.096
	0.452	0.096	1.077	0.161
	0.2	1.168	0.925	0.069
	0.174	0.048	0.391	0.756
	0.091	0.252	0.069	0.604
	0.217	0.043	0.091	0.308
	0.104	0.491	1.724	0.122
	0.113	0.973	1.168	0.278
	0.86	0.069	0.382	0.061
	0.069	0.295	0.065	0.052
	0.065	2.327	0.069	1.029
	0.282	0.061	0.439	0.651
	0.304	0.043	0.117	0.087
	0.104	0.421	0.074	0.056
	0.204	0.564	0.056	0.343
	0.174	0.126	0.135	0.469
	0.178	0.734	0.061	0.109
	0.065	0.043	0.651	2.375
	0.1	0.043	0.295	0.369
	0.191	0.152	0.052	0.491
	0.234	0.33	0.061	0.213
	0.096	0.091	0.999	0.156
	0.291	0.677	1.181	0.195
	0.191	0.326	0.777	0.052
	0.269	0.061	0.052	0.056
	0.096	0.043	0.295	0.873
	0.122	0.048	0.1	0.113
	0.178	0.078	0.152	0.703
	0.078	0.043	0.2	2.136
	0.13	0.43	0.165	0.1
	0.243	1.107	0.217	0.065
	0.074	0.126	0.421	0.091
	0.252	0.043	0.061	0.152
	0.078	0.048	0.1	0.143
	0.078	1.099	0.104	0.382
	0.109	0.043	0.304	0.156
	0.091	1.077	0.195	0.417
	0.113	0.408	0.417	0.043
	0.239	1.22	0.056	0.252
	0.525	0.239	0.065	0.096
	0.195	0.313	0.043	0.756
	0.082	0.165	0.117	0.065
	0.174	0.069	1.059	0.069
	0.117	0.504	0.621	0.078
	0.078	0.261	0.282	0.056
	0.13	0.065	0.082	0.278
	0.287	0.243	0.082	0.169
	0.1	0.096	0.096	0.243
	0.078	0.421	0.065	0.087
	0.117	0.139	0.439	1.185
	0.122	0.152	0.261	0.703
	0.091	0.291	0.061	0.725
	0.082	0.308	0.091	0.591
	0.13	0.043	0.104	4.303
	0.43	0.122	0.191	0.13
	0.078	0.056	0.052	0.23
	0.447	0.339	0.204	0.074
	0.773	0.777	0.1	0.195
	4.438	0.052	0.096	5.801
	0.356	0.061	3.287	0.052
	0.065	0.048	0.174	0.339
	0.069	0.117	0.139	0.256
	0.334	1.52	0.043	0.599
	0.074	0.178	0.065	0.082
	0.178	0.204	1.22	0.069
	0.126	0.261	0.981	3.018
	0.234	0.056	0.174	1.685
	0.091	0.048	0.156	0.412
	0.109	0.056	0.152	0.317
	0.165	0.056	0.065	0.165
	0.091	0.052	0.269	0.334
	0.082	0.521	0.069	2.779
	0.135	0.052	0.408	0.091
	0.143	0.065	0.373	0.078
	0.091	0.304	1.785	0.543
	0.122	0.048	0.625	0.174
	0.187	0.087	2.206	1.672
	0.1	0.069	0.052	0.66
	0.104	0.204	0.339	0.977
	0.156	0.043	0.165	1.107
	0.478	0.3	0.109	0.082
	0.069	0.056	0.708	2.397
	0.135	0.065	0.313	1.368
	0.282	0.217	0.043	0.065
	0.191	0.117	0.043	0.369
	0.122	0.091	0.065	0.082
	0.174	0.043	0.174	1.693
	0.234	0.052	0.126	0.239
	0.109	0.078	0.169	0.343
	0.087	0.23	0.573	0.061
	0.096	0.208	0.091	0.148
	0.13	0.1	0.056	0.148
	0.204	0.143	0.078	0.478
	0.169	0.191	0.113	0.556
	0.074	0.243	0.104	0.256
	0.365	0.521	0.182	0.816
	0.2	0.187	0.109	0.048
	0.117	0.069	0.113	0.043
	0.795	0.048	0.165	0.069
	0.13	0.043	0.048	0.773
	0.126	0.191	3.691	0.434
	0.36	0.582	0.916	1.142
	0.091	0.152	0.221	0.069
	0.156	0.082	0.048	0.165
	0.078	0.313	0.764	1.259
	0.139	0.143	0.191	1.702
	3.665	0.1	0.13	1.759
	0.1	0.135	0.174	0.104
	0.221	0.061	0.065	0.156
	0.152	0.061	0.048	0.608
	0.109	0.087	0.478	0.373
	0.139	0.208	0.352	0.213
	0.282	0.113	0.13	0.052
	0.313	0.161	0.152	0.239
	0.143	0.109	0.391	0.313
	0.33	0.061	0.052	0.79
	0.156	0.082	0.117	1.389
	0.165	0.373	0.152	0.156
	0.078	0.082	0.53	0.143
	0.182	0.161	0.521	1.072
	0.981	0.165	0.056	0.842
	0.139	0.504	1.038	0.226
	0.187	0.087	1.594	0.217
	1.368	0.117	0.13	0.052
	0.065	0.109	0.195	1.363
	0.23	0.078	0.056	0.139
	0.078	0.117	0.048	0.061
	0.208	0.152	0.443	0.226
	0.096	0.426	0.547	0.803
	0.2	0.161	0.339	0.434
	0.191	0.117	0.056	0.221
	0.117	0.048	0.165	1.159
	0.126	0.195	1.038	0.069
	0.278	0.052	0.061	0.187
	0.191	0.608	0.417	0.165
	1.411	0.052	0.208	0.1
	0.169	0.065	0.517	0.304
	0.543	0.504	2.284	1.437
	0.087	0.1	0.734	0.274
	0.577	0.065	0.1	0.13
	0.082	0.894	0.165	0.226
	0.686	0.226	0.682	0.113
	0.091	0.834	0.365	0.1
	0.426	0.33	0.109	0.899
	0.23	0.126	0.712	0.269
	0.065	0.109	0.048	0.369
	0.122	0.404	0.061	0.087
	0.1	0.091	0.052	1.19
	0.282	0.304	0.113	0.139
	0.13	0.052	0.061	0.065
	0.074	0.052	0.951	0.074
	0.139	0.061	0.087	0.986
	0.126	0.052	0.126	0.087
	0.842	0.204	0.074	0.043
	0.117	0.048	0.651	0.087
	0.165	0.082	0.139	0.925
	0.46	0.078	1.346	0.317
	0.087	0.113	0.412	0.269
	0.139	0.195	1.945	1.155
	0.082	0.182	0.999	0.056
	0.2	0.1	1.081	0.122
	0.113	0.056	0.043	0.951
	0.126	0.087	0.052	0.482
	0.139	0.443	0.043	0.117
	0.104	0.126	0.547	0.087
	0.087	0.074	0.851	0.082
	0.1	0.109	0.161	0.139
	0.491	0.23	0.096	1.719
	0.069	0.491	0.109	0.069
	0.096	0.056	1.776	0.252
	0.208	0.46	0.078	0.452
	0.1	0.182	1.125	0.265
	0.065	0.091	0.308	0.195
	0.139	0.174	1.42	0.252
	0.069	0.1	0.117	0.043
	0.243	0.052	0.056	0.473
	0.069	0.109	0.126	0.825
	0.117	0.052	0.473	0.447
	0.104	0.1	0.056	0.951
	0.243	0.043	0.452	0.317
	0.126	0.091	0.122	0.074
	0.087	0.673	0.434	0.109
	0.1	0.122	0.929	0.126
	0.082	0.491	0.069	1.268
	0.065	0.109	0.291	0.069
	0.091	0.091	1.32	0.551
	0.143	0.052	0.074	0.274
	0.078	0.043	0.048	0.174
	0.074	0.043	0.065	0.1
	0.287	0.894	0.043	0.056
	0.065	0.469	0.703	0.078
	0.942	0.304	0.043	0.369
	0.208	0.074	0.082	0.261
	0.139	0.243	0.074	0.421
	0.204	0.308	0.274	0.386
	0.343	0.347	0.074	0.065
	0.148	0.056	0.065	0.499
	0.082	0.126	0.056	0.274
	0.122	0.065	0.065	0.899
	0.234	0.078	0.23	0.052
	0.89	0.043	0.082	0.938
	0.161	0.482	0.052	0.304
	0.078	0.139	0.052	0.135
	0.13	0.043	0.048	0.447
	0.412	0.043	0.048	0.617
	2.301	0.043	0.065	0.043
	0.439	0.048	0.074	2.531
	0.122	0.1	0.556	0.182
	0.074	0.104	0.369	0.043
	0.096	1.585	0.135	0.165
	0.261	0.278	0.178	0.139
	0.065	1.411	0.126	1.424
	0.078	0.643	0.061	0.465
	0.473	0.282	0.096	0.122
	0.074	0.143	0.061	0.43
	0.109	3.76	0.069	0.048
	0.608	0.078	0.1	0.048
	0.191	0.091	0.043	0.13
	0.065	0.078	0.161	0.069
	0.065	0.043	0.052	0.143
	1.012	0.048	0.078	0.061
	0.564	0.291	0.152	0.048
	0.295	0.109	0.117	0.234
	0.113	0.052	0.508	0.048
	0.178	0.065	0.061	0.256
	0.1	0.326	0.903	0.061
	0.069	0.096	0.048	1.055
	0.217	0.052	0.061	0.043
	0.065	0.2	0.239	0.126
	0.065	0.295	0.043	0.408
	0.282	0.191	0.247	0.043
	0.069	0.052	0.586	0.261
	0.356	0.191	0.321	0.109
	0.195	0.126	0.091	0.091
	0.99	0.751	0.195	0.3
	0.234	0.056	0.304	0.174
	0.408	0.929	0.087	0.078
	0.074	0.317	0.452	0.043
	0.113	0.63	0.048	0.2
	0.191	0.247	0.126	0.091
	0.269	0.091	0.612	0.087
	0.417	1.233	0.078	0.061
	0.091	0.356	0.052	0.178
	0.23	0.452	0.239	0.304
	0.117	0.973	0.426	0.304
	0.091	0.217	0.656	0.421
	0.091	0.152	0.082	0.169
	0.104	0.382	0.664	0.122
	0.069	0.2	0.3	0.729
	0.395	0.313	0.043	0.621
	0.104	0.161	0.113	0.069
	0.087	0.434	2.31	0.269
	0.074	0.169	0.069	0.66
	0.126	0.056	0.478	0.178
	0.065	0.443	0.078	0.573
	0.117	0.043	0.043	0.061
	0.13	0.352	1.876	0.178
	0.087	0.069	0.113	0.321
	0.074	0.052	0.052	0.109
	0.143	0.452	0.091	0.065
	0.156	0.951	0.261	0.048
	0.191	0.082	0.043	0.23
	0.326	0.048	0.278	0.13
	0.399	5.38	0.109	0.352
	0.165	1.172	0.434	0.33
	0.677	0.122	2.162	0.577
	0.313	0.452	0.091	0.191
	0.087	1.528	0.069	0.126
	0.091	0.508	0.252	0.304
	0.091	0.056	0.069	0.265
	0.36	0.056	0.139	0.152
	0.082	1.133	0.043	0.109
	0.122	0.078	1.042	0.334
	0.191	0.669	0.664	0.109
	0.139	0.082	0.104	0.043
	0.091	0.096	0.1	0.2
	0.252	0.052	0.104	0.617
	0.1	0.061	0.043	0.404
	0.152	1.333	0.117	0.187
	1.112	0.069	0.096	0.074
	0.877	0.282	0.074	0.096
	0.078	0.313	0.217	0.317
	0.096	0.738	0.056	0.169
	0.1	0.056	0.104	0.1
	0.069	0.265	0.169	0.056
	0.143	0.074	0.043	0.143
	0.074	0.947	0.135	0.465
	0.087	0.365	0.056	0.048
	0.096	0.2	0.087	0.078
	0.213	0.36	0.056	0.169
	0.161	0.508	0.365	0.417
	0.161	0.274	0.551	0.069
	0.091	0.148	0.052	0.165
	0.065	0.122	0.078	0.247
	0.851	1.072	0.439	0.065
	0.261	0.109	0.604	0.117
	0.126	0.043	0.2	0.082
	0.234	0.065	0.074	0.204
	0.36	0.065	0.104	0.534
	0.082	0.139	0.152	0.091
	0.465	0.195	0.412	0.052
	0.091	0.295	0.582	0.082
	0.122	0.096	0.096	0.113
	0.148	0.091	0.842	0.069
	0.174	13.326	0.404	0.178
	0.117	1.489	0.043	0.052
	0.065	0.061	0.221	0.056
	0.065	0.304	0.538	0.096
	0.078	0.239	0.082	0.056
	0.326	1.963	0.165	0.452
	1.029	0.104	0.534	0.091
	0.113	1.442	0.947	0.213
	0.386	0.721	0.048	0.404
	0.109	0.048	2.275	0.117
	1.203	0.087	0.056	0.187
	0.734	0.282	0.074	0.373
	0.065	0.069	0.065	0.204
	0.152	0.161	0.1	0.217
	0.143	0.078	0.065	1.372
	0.082	0.339	0.23	0.048
	0.074	0.604	0.104	0.043
	0.135	1.329	0.109	1.641
	1.337	0.465	0.048	0.043
	0.76	0.065	0.703	0.165
	0.069	0.278	0.104	0.096
	0.208	0.074	0.052	0.109
	0.577	2.093	0.256	0.117
	0.682	0.126	0.056	0.082
	0.065	0.061	0.056	0.117
	0.161	0.065	0.426	0.282
	0.195	0.773	0.117	0.135
	0.122	0.074	3.317	0.3
	0.291	0.078	0.069	0.174
	0.082	0.048	0.278	0.082
	0.239	1.637	0.087	0.195
	0.113	0.473	0.074	0.182
	0.069	0.13	0.109	0.182
	0.217	0.634	0.087	0.065
	0.321	0.135	0.373	0.048
	0.126	0.126	0.056	0.404
	0.104	0.274	0.078	0.291
	0.504	0.048	0.104	0.074
	0.069	0.061	0.608	0.069
	0.078	0.069	0.048	0.13
	1.485	0.087	0.2	0.447
	0.13	1.086	0.069	0.043
	0.113	0.065	0.061	0.143
	0.065	7.894	0.356	0.069
	0.117	0.056	0.048	0.052
	0.521	1.059	0.178	0.087
	1.146	0.317	0.056	0.109
	0.148	1.316	0.295	0.043
	0.89	0.291	0.078	0.135
	1.359	0.482	0.252	0.426
	0.304	0.195	0.043	0.447
	0.174	0.751	0.1	0.048
	0.243	1.376	2.683	0.056
	0.317	0.069	0.056	0.491
	0.161	0.078	0.069	0.043
	4.012	0.404	0.048	0.2
	0.187	0.234	0.43	0.412
	0.074	0.391	1.802	0.048
	0.551	0.434	0.096	0.391
	0.221	0.243	2.779	0.096
	0.347	0.495	0.091	0.048
	0.174	0.117	0.082	0.122
	0.313	0.352	0.109	0.122
	2.505	2.08	0.122	0.295
	0.087	0.99	0.082	0.191
	0.117	0.443	0.082	0.213
	0.065	0.082	0.86	0.156
	2.497	0.056	0.074	0.625
	0.239	0.082	0.135	0.048
	0.417	0.33	0.065	0.217
	0.043	6.869	0.243	0.056
	0.838	0.043	0.352	0.426
	0.148	4.95	0.829	0.069
	0.217	0.082	0.104	0.256
	0.921	0.074	0.195	0.365
	0.365	0.569	0.091	0.512
	0.482	0.096	0.052	0.043
	0.2	0.056	0.056	0.104
	0.221	0.096	0.551	0.074
	0.069	0.052	1.033	0.208
	0.234	0.074	1.133	0.117
	0.096	0.104	0.499	0.1
	1.732	0.082	0.165	0.261
	0.182	0.087	2.293	0.304
	1.281	7.025	0.135	0.078
	0.96	2.814	0.043	0.538
	0.043	0.651	0.686	0.63
	0.773	0.069	0.239	0.113
	1.112	1.042	0.838	0.056
	0.109	0.065	0.104	0.096
	1.442	0.096	1.329	0.33
	0.087	0.096	0.074	0.208
	0.282	0.261	0.282	0.152
	0.043	0.065	0.052	0.187
	1.355	0.061	3.326	0.252
	0.048	0.096	0.069	0.082
	0.091	0.087	2.423	0.564
	0.087	0.13	0.061	0.256
	0.873	0.256	0.686	0.156
	0.078	0.087	0.508	0.321
	0.278	0.187	0.204	0.143
	0.043	0.091	0.048	0.065
	0.195	2.579	0.469	0.187
	0.252	0.074	0.139	0.534
	0.056	1.915	0.421	0.543
	0.091	0.091	0.056	0.082
	0.048	0.056	0.161	0.082
	0.261	0.243	0.082	0.061
	0.078	0.174	0.048	0.208
	0.043	0.873	0.295	0.208
	0.082	0.122	0.182	0.352
	0.113	0.265	0.1	0.256
	0.938	0.343	0.265	0.195
	0.065	0.069	0.065	0.482
	0.061	0.135	0.048	0.456
	0.104	0.925	0.122	0.321
	0.382	0.152	0.087	0.213
	0.043	0.117	0.634	0.061
	0.178	0.056	0.139	0.065
	0.161	3.56	0.056	0.082
	0.122	3.161	0.287	0.104
	0.052	0.043	0.087	0.082
	0.043	0.156	0.356	0.317
	0.122	0.208	0.069	0.043
	0.043	0.048	0.373	0.069
	0.291	0.208	0.087	0.391
	0.156	0.994	0.096	0.313
	0.065	0.178	0.087	0.091
	0.113	1.077	0.104	0.195
	0.122	0.1	0.942	0.048
	0.617	0.53	0.043	0.113
	0.677	0.052	0.3	0.061
	0.069	0.043	0.799	0.261
	0.356	0.399	0.356	0.365
	0.048	0.091	0.104	0.052
	0.152	0.69	0.065	0.148
	1.142	0.078	1.138	0.239
	0.512	0.191	2.145	0.412
	0.078	0.247	0.582	0.065
	0.043	0.204	0.122	0.078
	0.117	1.368	0.304	0.434
	0.195	0.061	0.043	0.287
	0.256	0.122	0.122	0.291
	0.056	0.36	0.126	0.043
	0.161	0.074	0.061	0.842
	0.074	0.082	0.274	0.143
	0.087	0.074	0.043	0.256
	0.091	0.182	0.135	0.243
	0.048	0.595	0.126	0.252
	0.091	0.495	0.182	0.195
	0.056	0.087	0.061	0.2
	1.19	0.126	0.052	0.048
	0.061	0.109	0.122	0.078
	0.048	0.048	0.417	0.074
	0.056	0.043	0.452	0.052
	0.634	0.074	0.104	0.082
	0.191	0.786	0.53	0.161
	0.069	0.043	0.156	0.043
	0.287	0.143	0.287	0.686
	0.048	0.204	0.165	0.096
	0.673	0.082	0.056	0.065
	0.096	0.065	0.074	0.486
	0.056	0.504	0.052	0.525
	0.091	0.061	1.207	0.143
	0.061	0.838	0.239	0.473
	0.056	0.104	0.056	0.187
	0.143	0.056	0.339	0.074
	0.208	0.096	1.264	0.287
	0.734	0.117	0.122	0.582
	0.043	0.239	0.061	0.061
	1.902	0.135	0.899	0.417
	0.048	0.139	0.365	0.065
	1.424	0.907	0.174	0.069
	0.078	0.139	1.185	0.135
	0.069	0.33	0.096	0.065
	0.109	1.346	0.087	0.508
	0.048	0.048	0.174	0.122
	0.261	0.152	0.109	0.078
	0.426	0.096	0.669	0.221
	0.699	0.052	0.334	0.061
	0.482	15.414	0.052	0.3
	0.178	0.069	0.069	0.399
	0.087	0.491	0.738	1.394
	0.63	0.265	0.126	0.295
	0.069	0.139	0.043	0.899
	0.981	0.056	0.043	0.977
	0.109	1.081	0.148	0.326
	0.061	0.161	0.517	0.191
	0.269	1.754	0.122	0.165
	0.082	0.182	0.747	0.795
	0.065	0.069	0.061	0.265
	0.456	0.061	0.695	0.091
	0.139	0.421	0.056	0.69
	0.043	0.408	0.156	0.221
	0.195	5.588	3.261	0.182
	0.048	0.078	0.065	0.061
	0.056	0.048	0.048	0.287
	2.175	0.117	0.165	0.321
	2.049	2.288	0.052	0.091
	0.2	0.113	0.048	0.221
	0.043	12.731	0.369	0.043
	0.056	0.056	0.061	1.12
	0.1	0.742	0.061	0.104
	0.065	0.052	0.043	0.135
	0.048	1.676	0.065	0.217
	0.074	1.485	0.495	0.078
	0.929	0.234	0.082	0.287
	0.135	1.125	0.269	0.156
	0.1	1.793	2.918	0.087
	0.126	0.447	0.152	0.3
	3.435	0.191	0.287	0.221
	0.109	0.673	0.052	0.182
	0.525	1.029	0.113	0.165
	0.048	0.043	1.142	0.304
	0.091	0.052	0.604	0.169
	0.074	1.237	0.143	0.317
	0.152	0.052	0.061	0.135
	0.109	0.117	2.314	0.964
	0.104	0.221	0.834	0.23
	0.921	0.052	2.887	0.43
	0.087	0.947	0.33	0.269
	0.638	0.052	0.056	0.595
	0.23	0.052	0.052	0.165
	0.052	0.864	0.456	0.195
	0.082	0.317	0.152	0.061
	0.182	0.126	0.043	0.417
	0.052	0.113	1.528	0.53
	0.048	0.122	0.048	0.056
	0.065	0.096	0.23	0.308
	0.1	0.135	0.161	0.643
	0.109	0.043	1.077	0.208
	0.135	0.734	0.282	0.148
	1.745	0.152	0.056	0.048
	0.291	2.918	0.104	0.36
	0.048	0.135	0.091	0.308
	1.654	0.122	0.135	0.182
	0.143	0.182	0.061	0.777
	0.773	0.096	0.056	2.062
	0.352	3.109	0.126	0.178
	1.541	0.282	0.269	0.091
	0.517	0.586	0.091	0.078
	1.672	0.052	0.33	0.23
	0.082	0.408	0.308	0.126
	0.447	0.373	0.204	0.13
	0.252	0.156	0.096	0.773
	0.256	0.087	0.247	0.682
	0.043	0.052	0.517	1.924
	0.126	0.087	0.082	0.265
	0.043	0.473	0.048	0.082
	0.052	1.902	0.265	0.117
	0.204	0.096	0.069	0.725
	0.143	0.538	0.052	0.482
	0.096	0.247	0.443	1.567
	0.061	0.109	0.048	0.165
	0.161	0.096	0.056	0.439
	0.069	0.043	0.061	1.251
	0.977	0.252	0.152	0.091
	0.321	0.091	0.243	0.443
	0.373	0.369	0.178	0.221
	0.217	0.221	0.139	0.221
	0.104	0.13	0.061	0.065
	0.729	0.043	0.078	1.394
	0.447	0.043	0.89	1.068
	0.078	0.638	0.087	0.339
	0.152	2.041	0.043	0.295
	0.478	0.048	0.065	0.052
	0.234	0.069	0.061	0.399
	0.295	0.703	0.495	0.821
	0.178	0.122	0.109	0.174
	0.599	0.048	0.825	1.416
	0.66	2.154	0.139	1.342
	0.269	0.469	0.404	2.119
	0.139	0.152	0.078	1.042
	0.104	0.226	0.221	0.326
	0.525	0.056	0.304	0.33
	0.056	1.255	1.307	0.769
	0.1	0.191	0.669	1.832
	1.676	0.082	0.764	0.043
	0.182	0.074	0.174	0.043
	0.065	0.052	0.087	1.272
	0.043	0.269	0.082	1.125
	0.842	0.178	0.052	0.386
	0.043	0.065	0.452	0.677
	0.043	1.064	0.187	0.252
	0.117	0.104	0.126	0.373
	0.052	0.091	0.217	0.751
	0.043	0.052	1.203	0.043
	0.265	0.13	0.456	0.378
	0.109	1.164	0.056	0.426
	1.402	0.178	0.165	1.107
	0.213	0.538	0.651	0.169
	0.412	0.738	0.408	0.182
	0.056	0.117	0.3	0.096
	2.254	0.226	0.1	0.043
	0.122	0.087	0.161	0.556
	0.217	0.122	0.043	0.321
	0.126	0.082	0.096	0.143
	0.391	0.13	0.191	0.104
	0.048	0.048	0.109	0.152
	0.135	0.313	0.195	1.133
	2.054	0.148	0.217	0.139
	0.056	0.113	0.161	0.512
	0.056	0.052	0.091	0.096
	0.89	0.048	0.517	0.161
	0.096	0.043	0.261	0.082
	0.117	0.096	0.169	0.912
	2.432	1.168	0.373	0.699
	0.078	0.191	0.061	1.698
	1.802	9.11	0.191	0.391
	1.533	0.061	0.213	0.842
	0.208	1.802	0.052	0.604
	0.109	0.443	0.113	1.685
	0.065	0.104	0.087	0.065
	1.125	0.096	0.091	0.113
	0.048	0.048	0.139	0.386
	0.048	0.061	0.1	0.256
	0.942	1.094	0.499	0.178
	0.395	0.221	0.13	0.13
	2.705	1.455	0.278	0.352
	0.677	0.525	0.174	0.473
	0.226	1.954	0.165	0.282
	0.23	0.161	0.091	0.156
	0.122	0.091	0.143	0.912
	1.255	0.1	0.069	0.052
	1.594	0.104	0.169	0.217
	0.695	0.122	0.894	0.486
	0.043	0.152	0.434	0.13
	0.065	0.556	0.13	0.109
	0.33	0.048	0.182	0.082
	0.304	0.074	0.308	0.082
	0.447	0.061	0.738	0.048
	0.291	0.174	0.052	0.221
	0.434	0.169	1.216	0.109
	0.256	0.069	0.369	0.1
	2.175	0.065	0.313	0.078
	2.201	0.056	0.169	0.152
	0.278	0.096	0.365	0.195
	0.148	1.863	0.482	0.182
	0.56	3.734	0.221	0.052
	1.494	0.143	0.048	0.729
	0.048	0.061	0.104	0.586
	0.065	0.482	0.308	1.424
	0.161	0.069	0.152	0.135
	0.069	0.1	0.595	0.295
	0.386	0.061	0.087	0.065
	0.903	0.152	0.734	1.194
	1.107	1.181	0.048	0.078
	0.056	0.069	0.117	0.182
	0.365	0.056	0.43	0.135
	0.135	0.1	2.067	0.36
	0.043	0.439	0.621	0.894
	1.459	0.052	0.056	0.043
	0.195	0.043	0.065	0.252
	0.278	0.126	0.117	0.091
	0.165	2.718	0.174	0.53
	0.074	0.191	0.109	0.096
	0.139	0.434	0.065	0.812
	0.148	0.048	0.113	0.751
	0.821	0.091	0.208	0.247
	0.048	1.281	0.13	0.53
	1.376	0.048	0.213	0.656
	0.135	0.078	0.043	0.851
	0.052	0.443	1.151	0.773
	0.135	0.847	0.087	0.79
	0.36	0.1	0.069	0.126
	0.256	0.365	0.382	0.517
	0.082	0.087	0.096	0.117
	0.916	0.087	0.048	2.267
	0.426	0.36	0.087	0.052
	0.126	0.152	1.806	0.404
	0.261	0.499	0.234	0.048
	0.208	1.038	0.274	0.247
	0.087	0.934	0.078	0.182
	0.291	1.745	0.143	0.104
	1.333	0.113	0.287	2.041
	0.148	0.061	0.061	0.512
	1.685	2.262	0.656	0.087
	0.078	0.048	0.069	0.334
	0.677	0.078	0.148	0.043
	0.495	0.043	0.052	1.32
	0.082	0.881	0.738	0.117
	0.894	6.313	0.178	0.482
	0.378	2.379	0.1	0.13
	0.66	0.043	0.117	1.381
	1.394	1.906	0.069	0.148
	1.016	0.274	0.082	0.551
	1.368	0.061	2.102	0.161
	1.02	0.104	0.109	0.056
	0.052	1.146	0.056	0.069
	0.287	0.043	0.504	0.048
	0.043	0.096	0.161	0.139
	0.126	0.043	0.261	1.112
	1.303	0.191	0.334	0.148
	0.899	0.043	0.069	0.069
	0.096	0.165	0.191	0.278
	0.308	0.478	0.903	0.625
	0.621	0.069	0.061	0.2
	0.247	0.456	0.604	0.473
	0.161	0.195	0.234	0.056
	0.091	0.135	0.556	0.213
	0.291	0.048	0.043	0.052
	0.043	0.048	0.36	0.187
	0.126	0.221	0.265	0.096
	0.191	0.078	0.056	0.543
	0.269	1.255	0.091	0.986
	0.056	0.191	0.065	0.113
	0.122	1.863	0.048	0.082
	0.174	0.078	0.252	0.239
	0.226	0.347	0.187	0.135
	0.334	0.091	0.143	0.061
	0.187	0.056	0.404	0.052
	0.065	0.126	0.113	0.3
	0.152	0.052	0.126	1.09
	0.139	0.356	0.069	0.048
	0.074	0.069	0.191	0.234
	0.469	0.109	0.365	0.482
	0.174	0.043	0.074	0.243
	0.056	0.725	0.082	0.169
	0.456	0.1	0.135	0.695
	0.078	1.502	0.191	0.925
	0.043	0.973	0.148	0.326
	0.122	0.091	0.065	0.126
	0.287	0.738	0.069	0.065
	0.395	0.178	0.069	0.052
	0.113	0.278	0.247	0.087
	0.122	0.091	0.195	0.061
	0.056	0.096	1.19	0.065
	0.343	0.33	0.061	0.122
	0.1	0.087	0.135	0.955
	0.582	0.139	2.275	0.46
	0.404	1.133	0.113	0.534
	0.204	0.074	0.195	0.174
	0.339	0.048	0.048	1.693
	0.122	0.256	0.122	0.109
	0.682	0.061	0.087	0.439
	0.208	0.165	1.407	0.777
	0.617	0.182	0.386	0.052
	0.604	0.33	0.256	0.204
	0.043	0.078	0.074	0.113
	0.087	0.087	0.313	3.296
	0.056	0.087	0.087	0.174
	0.109	0.143	0.143	0.069
	0.295	0.608	0.135	2.757
	0.043	0.074	0.048	0.152
	0.278	0.508	0.096	0.903
	0.043	0.078	0.052	0.139
	0.174	0.043	0.122	0.069
	0.274	0.612	0.096	0.499
	0.217	0.221	0.256	0.556
	0.282	1.146	0.143	0.2
	0.486	1.745	0.573	0.048
	1.177	0.082	0.043	0.117
	0.048	2.709	0.213	5.115
	0.265	0.903	0.109	1.038
	0.065	3.035	0.139	2.379
	0.056	0.087	0.786	1.337
	1.62	0.204	0.069	0.33
	1.033	0.087	0.13	0.065
	1.663	0.135	0.247	0.074
	0.63	3.53	0.1	0.082
	0.725	0.174	0.334	1.368
	0.1	0.074	0.36	0.36
	0.304	0.087	1.198	0.36
	0.13	0.213	0.048	0.894
	0.261	8.371	0.13	0.104
	0.46	0.864	0.274	0.113
	0.096	0.213	0.117	0.061
	0.321	0.052	0.412	0.052
	0.056	0.087	0.043	1.937
	0.386	0.343	0.195	0.096
	0.53	0.061	0.109	0.043
	0.117	0.056	0.486	0.087
	0.056	0.256	0.313	0.048
	0.091	1.424	0.386	0.551
	0.104	0.673	0.955	0.069
	0.907	0.048	0.1	2.51
	0.065	0.1	0.052	0.052
	0.043	0.23	0.091	0.929
	0.078	0.221	1.016	1.533
	0.082	0.078	0.082	0.078
	0.126	0.104	0.586	4.316
	0.117	0.043	1.589	1.198
	0.321	1.711	0.052	0.082
	0.078	0.117	0.165	0.53
	0.143	5.519	0.096	1.468
	0.074	0.056	0.069	0.174
	0.13	0.447	0.061	0.729
	0.482	0.065	0.052	0.977
	0.829	1.268	0.052	0.074
	0.087	0.043	0.069	0.729
	0.052	0.269	0.638	0.187
	0.074	0.2	0.043	0.061
	0.234	0.061	0.308	0.469
	0.065	0.187	0.065	0.373
	0.343	1.676	0.043	0.048
	0.139	0.096	0.104	0.782
	0.161	1.429	0.195	0.221
	1.09	0.647	0.087	0.048
	1.524	1.719	0.252	0.504
	0.087	0.074	0.087	0.126
	0.447	3.947	0.217	1.055
	0.243	0.187	0.156	0.399
	0.052	0.126	0.23	0.048
	1.185	0.104	0.36	0.63
	0.082	0.117	0.274	0.135
	0.048	0.052	0.343	0.339
	0.122	0.1	0.065	0.408
	0.078	0.069	0.247	0.065
	0.069	1.016	0.182	2.314
	0.148	0.096	0.065	0.764
	0.317	0.052	0.052	1.203
	0.065	0.061	0.742	0.577
	0.109	0.117	0.048	0.174
	0.169	0.326	0.096	0.339
	0.113	0.065	0.247	0.738
	0.169	0.043	0.152	0.769
	0.069	0.63	0.043	0.178
	0.36	1.181	0.087	0.126
	0.161	0.091	0.048	0.213
	0.052	0.061	0.091	0.343
	0.517	0.109	0.082	0.708
	0.048	5.606	0.182	0.065
	0.269	0.156	0.078	0.36
	0.082	0.821	0.165	1.463
	0.069	1.424	0.221	0.048
	0.261	1.02	0.182	0.595
	0.078	0.321	0.043	3.122
	0.117	0.048	0.048	1.394
	0.082	0.89	0.521	0.521
	0.317	0.204	0.096	0.2
	0.082	0.152	0.052	4.407
	0.204	0.091	0.443	0.056
	0.716	0.135	1.051	0.13
	0.135	0.278	0.091	0.165
	0.152	0.178	1.255	0.052
	0.135	0.048	0.287	0.113
	0.061	0.074	0.117	4.815
	0.043	0.048	5.475	0.243
	0.117	7.225	0.517	3.925
	0.065	0.048	0.169	1.924
	0.143	0.269	0.873	0.534
	0.087	0.356	0.048	0.499
	0.082	0.109	0.043	1.12
	0.109	0.321	0.951	0.421
	0.182	2.844	0.195	1.138
	0.161	0.082	0.056	0.043
	0.078	2.162	0.903	3.313
	0.117	0.126	0.048	0.595
	0.1	0.191	0.096	1.337
	0.126	0.078	3.23	0.287
	0.087	0.091	7.516	0.591
	0.165	2.075	0.082	0.695
	0.074	0.082	3.977	0.191
	0.043	0.069	0.065	0.187
	0.234	0.399	0.069	0.087
	0.091	0.052	0.096	0.048
	0.135	0.122	0.048	0.2
	0.117	0.087	0.082	0.573
	0.078	0.274	0.13	0.091
	0.056	1.355	0.473	0.256
	0.165	0.074	0.156	0.126
	0.078	0.091	0.187	0.061
	0.065	0.065	0.091	0.295
	0.208	0.1	0.061	0.043
	0.117	0.122	0.274	0.061
	0.226	0.495	0.122	0.087
	0.256	0.043	0.447	0.873
	0.152	0.23	0.048	0.043
	0.109	0.113	0.174	0.043
	0.078	6.114	0.117	2.193
	0.069	0.143	0.056	0.695
	0.043	0.2	0.104	0.556
	0.104	0.221	0.534	0.117
	0.069	4.624	0.061	0.412
	0.091	0.369	0.326	0.699
	0.056	0.082	0.122	0.352
	0.252	0.048	0.13	0.786
	0.217	0.152	0.243	0.174
	0.256	0.617	0.122	0.148
	0.182	0.056	0.091	0.156
	0.056	0.903	0.052	0.109
	0.165	0.204	0.069	0.308
	0.169	0.156	0.482	0.356
	0.395	0.1	0.1	0.408
	0.052	0.161	0.586	0.117
	0.742	3.235	0.404	0.612
	0.117	0.109	0.069	0.139
	0.109	0.165	0.834	0.239
	0.13	1.329	0.139	0.439
	0.187	2.423	0.204	0.1
	0.217	0.369	0.395	0.208
	0.135	0.126	1.146	0.938
	0.048	0.078	1.476	0.043
	0.1	0.148	0.122	0.104
	0.13	0.048	0.061	0.065
	0.187	2.666	1.264	1.277
	1.159	0.265	0.56	0.135
	0.091	0.074	0.087	0.117
	0.495	0.043	0.538	0.1
	0.056	0.122	0.252	0.117
	1.537	0.074	0.434	0.234
	0.304	0.048	1.776	0.738
	0.143	0.161	0.143	0.239
	0.156	0.191	0.135	0.139
	1.602	0.043	0.195	0.078
	0.213	2.809	0.617	1.077
	0.239	0.043	2.314	0.104
	0.165	0.082	2.809	0.208
	0.052	0.065	0.326	0.465
	0.152	0.426	0.617	0.356
	0.148	0.065	0.756	0.773
	0.109	0.117	0.443	0.052
	1.29	0.056	0.078	0.052
	0.078	0.178	0.69	0.182
	0.169	0.139	0.465	0.122
	0.126	0.161	0.369	0.122
	0.109	0.195	0.13	1.055
	0.069	0.247	1.62	1.138
	1.363	0.143	0.643	0.056
	0.564	0.174	0.261	0.109
	0.091	0.056	0.577	0.117
	0.056	0.074	0.434	0.564
	0.065	0.078	0.99	1.889
	0.096	0.469	0.43	0.161
	0.043	0.243	0.056	0.126
	0.104	0.065	0.096	0.96
	0.065	0.747	0.465	0.326
	0.096	0.043	1.602	0.447
	0.117	0.087	0.782	0.426
	0.243	0.261	0.174	0.061
	0.491	0.069	0.673	0.096
	0.191	0.139	1.637	0.074
	0.356	0.091	3.747	0.751
	0.221	0.091	0.043	0.078
	0.373	0.139	1.798	0.243
	0.1	0.339	0.729	0.452
	0.369	0.043	1.476	0.069
	0.065	0.586	0.742	0.13
	2.106	0.056	0.048	0.065
	0.478	0.096	0.082	0.048
	1.172	0.048	0.308	0.113
	0.074	0.465	0.947	0.104
	0.052	0.048	2.762	0.165
	0.495	0.13	0.056	0.217
	0.573	0.339	0.126	0.156
	0.356	0.339	0.421	0.426
	0.96	0.547	0.951	0.143
	0.673	0.182	2.162	0.165
	0.109	0.104	0.1	0.074
	0.061	0.052	0.043	0.061
	0.126	0.955	0.538	0.065
	0.091	0.091	0.274	0.1
	0.439	0.491	0.169	0.109
	0.043	0.573	5.857	0.109
	0.599	0.056	0.061	0.1
	0.074	0.486	0.208	0.052
	0.078	0.803	0.087	0.13
	0.269	0.152	0.043	0.069
	0.777	0.165	0.087	0.287
	0.139	0.043	0.221	0.052
	0.3	0.769	0.143	0.187
	0.452	0.317	1.463	0.056
	0.53	0.538	0.113	0.161
	0.851	1.337	2.032	0.074
	0.069	0.352	0.955	0.234
	0.048	1.272	0.048	0.373
	0.148	0.595	1.303	0.117
	0.113	0.109	0.36	0.056
	0.091	0.994	1.554	0.208
	0.174	0.234	0.317	0.074
	0.043	0.187	2.505	0.109
	0.065	0.851	0.174	0.061
	0.065	0.247	0.53	0.712
	0.052	0.043	0.056	0.113
	0.508	0.048	1.776	0.052
	0.252	0.074	1.32	0.069
	0.247	1.181	0.056	0.043
	0.087	0.729	0.061	0.369
	0.065	0.065	0.573	0.113
	0.082	1.055	0.13	0.117
	0.091	0.334	0.265	0.195
	0.252	0.304	0.087	0.122
	0.113	0.048	0.3	0.352
	0.122	1.554	0.182	0.109
	0.326	0.265	4.559	0.139
	0.252	0.074	0.2	0.048
	0.117	0.391	0.239	0.087
	0.096	1.615	0.456	0.061
	0.269	0.347	0.899	0.078
	0.148	0.291	0.109	0.156
	0.36	0.143	0.421	0.126
	0.096	0.087	0.291	0.321
	1.889	0.3	1.52	0.113
	0.048	2.484	0.378	0.139
	0.065	0.043	0.187	0.13
	0.408	0.721	0.052	0.213
	0.252	0.043	0.443	0.052
	0.439	0.421	0.065	0.056
	0.117	0.043	0.217	0.091
	0.048	1.585	0.074	0.99
	0.352	0.243	0.491	0.647
	0.195	0.074	0.087	1.498
	0.712	0.048	0.391	0.252
	0.265	0.547	0.065	0.53
[truncated: 2,330 more rows]

## Sheet: Fig2C
Peripheral focal adhesions area (µm²)	Control	VAPA KO	VAPA KO+Ch-VAPA	VAPA KO+Ch-VAPA KD/MD		Control	VAPA KO	VAPA KO+Ch-VAPA	VAPA KO+Ch-VAPA KD/MD
	0.148	0.104	0.434	0.651	Mean	0.342946	0.312911	0.355548	0.327306
	0.056	0.195	0.478	0.63	SEM	0.0119278	0.0126505	0.0107358	0.011461
	0.2	0.23	0.764	0.478
	0.33	0.265	0.3	0.421
	0.304	0.343	0.747	0.426
	0.278	0.308	0.1	0.404
	0.23	0.148	0.404	0.13
	0.23	0.36	0.3	0.2
	0.139	0.2	0.187	0.195
	0.104	0.426	0.347	0.143
	0.169	0.408	0.239	0.174
	0.13	0.226	0.434	0.261
	0.204	0.148	0.178	0.716
	0.191	0.36	0.46	0.352
	0.204	0.2	0.278	0.356
	0.187	0.426	0.326	0.729
	0.148	0.408	0.161	0.686
	0.13	0.226	0.178	0.881
	0.135	0.161	0.161	0.586
	0.1	0.169	0.091	0.465
	0.109	0.1	0.182	0.469
	0.308	0.191	0.056	0.673
	0.3	0.117	0.182	0.326
	0.156	0.23	0.274	0.156
	0.1	0.117	0.213	0.417
	0.109	0.104	0.195	0.604
	0.1	0.178	0.239	0.677
	0.109	0.165	0.182	0.408
	0.308	0.369	0.456	0.148
	0.3	0.122	0.473	0.182
	0.156	0.117	0.569	0.165
	0.208	0.161	0.612	0.282
	0.274	0.104	0.391	0.139
	0.139	0.091	0.304	0.3
	0.109	0.1	0.295	0.234
	0.148	0.139	0.265	0.221
	0.117	0.313	0.543	0.582
	0.1	0.256	0.326	0.439
	0.143	0.139	0.56	0.591
	0.13	0.2	0.178	0.295
	0.1	0.439	0.3	0.577
	0.122	0.109	0.664	0.625
	0.156	0.156	0.756	0.842
	0.174	0.217	0.808	0.239
	0.282	0.43	0.287	0.269
	0.317	0.165	0.482	0.161
	0.13	0.1	0.673	0.143
	0.13	0.126	0.621	0.369
	0.152	0.156	0.304	0.13
	0.79	0.13	0.174	0.343
	0.148	0.334	0.256	0.195
	0.208	0.234	0.3	0.122
	0.139	0.148	0.577	0.569
	0.156	0.148	0.708	0.877
	0.247	0.274	0.69	0.868
	0.109	0.291	0.295	0.365
	0.187	0.261	0.482	0.256
	0.278	0.165	0.217	0.247
	0.317	0.495	0.174	0.543
	0.13	0.308	0.347	0.221
	0.169	0.404	0.234	0.313
	0.178	0.295	0.326	0.343
	0.104	0.265	0.195	1.203
	0.261	0.221	0.373	0.343
	0.161	0.243	0.287	0.317
	0.126	0.404	0.386	0.326
	0.113	0.643	0.234	0.178
	0.256	0.369	0.265	0.221
	0.117	0.234	0.204	0.313
	0.517	0.256	0.295	0.343
	0.56	0.591	0.291	1.203
	0.725	0.534	0.426	0.343
	0.556	0.573	0.243	0.317
	0.122	0.321	0.491	0.326
	0.2	0.916	0.352	0.178
	0.369	0.756	0.638	0.43
	0.612	0.547	0.365	0.343
	0.274	0.482	0.347	0.321
	0.161	0.947	0.699	0.287
	0.782	1.203	0.478	0.239
	0.634	0.391	0.317	0.13
	0.942	0.278	0.161	0.122
	0.577	0.252	0.469	0.135
	0.825	0.421	0.252	0.247
	0.517	0.226	0.595	0.143
	0.343	0.291	0.287	0.148
	0.187	0.165	0.842	0.256
	0.178	0.13	0.491	0.174
	0.304	0.491	0.23	0.213
	0.148	1.059	0.165	0.234
	0.269	0.391	0.417	0.104
	0.152	0.2	0.1	0.43
	0.122	0.447	0.517	0.143
	0.143	0.135	0.195	0.135
	0.13	0.113	0.139	0.109
	0.135	0.33	0.161	0.208
	0.161	0.443	0.217	0.23
	0.23	0.243	0.204	0.213
	0.143	0.148	0.439	0.23
	0.148	0.104	0.786	0.213
	0.278	0.109	0.23	0.23
	0.191	0.243	0.569	0.213
	0.135	0.2	0.56	0.282
	0.143	0.182	0.721	0.23
	0.104	0.512	0.551	0.452
	0.243	0.13	0.295	0.382
	0.143	0.139	0.708	0.712
	0.156	0.117	0.556	0.139
	0.46	0.291	0.53	0.221
	0.217	0.208	0.517	0.964
	0.104	0.169	0.777	0.434
	0.113	0.143	0.551	0.252
	0.122	0.182	0.469	0.534
	0.699	0.551	0.208	0.33
	0.234	0.643	0.738	0.295
	0.382	0.247	0.699	0.373
	0.317	0.456	0.326	0.677
	0.191	0.126	0.556	0.773
	0.191	0.378	0.43	0.339
	0.308	0.226	0.143	0.408
	0.469	0.178	0.13	0.148
	0.109	0.226	0.087	0.295
	0.165	0.178	0.069	0.664
	0.217	0.135	0.126	0.504
	0.13	0.091	0.204	0.13
	0.321	0.217	0.1	0.612
	0.156	0.113	0.33	0.139
	0.104	0.187	0.161	0.187
	0.274	0.261	0.208	0.243
	0.208	0.109	0.1	0.352
	0.382	0.148	0.356	0.117
	0.239	0.1	0.443	0.378
	0.651	0.148	0.274	0.317
	0.66	0.174	0.408	0.148
	0.499	0.139	0.347	0.347
	0.456	0.699	0.261	0.538
	0.469	0.478	0.078	0.161
	0.221	0.334	0.391	0.3
	0.247	0.46	0.213	0.243
	0.287	0.538	0.282	0.321
	0.499	0.169	0.308	0.178
	0.174	0.169	0.426	0.182
	0.534	0.126	0.126	0.512
	0.521	0.165	0.221	0.321
	0.512	0.152	0.395	0.139
	0.907	0.13	0.3	0.104
	0.2	0.156	0.452	0.261
	0.308	0.113	0.161	0.204
	0.339	0.178	0.23	0.265
	0.36	0.169	0.187	0.069
	0.165	0.174	0.087	0.365
	0.182	0.334	0.096	0.321
	0.109	0.217	0.821	0.608
	0.261	0.295	0.161	0.23
	0.143	0.604	0.2	0.178
	0.786	0.139	0.178	0.2
	0.2	1.007	0.46	0.122
	0.725	0.182	1.116	0.399
	0.612	0.195	0.417	0.252
	0.269	0.221	0.347	0.291
	0.96	0.148	0.161	0.343
	0.76	0.395	0.191	0.126
	0.808	0.13	0.2	0.347
	0.382	0.152	0.417	0.139
	0.217	0.109	0.543	0.208
	0.208	0.23	0.23	0.213
	0.234	0.122	0.182	0.356
	0.347	0.156	0.161	0.339
	0.347	0.282	0.208	0.239
	0.174	0.152	0.265	0.239
	0.148	0.326	0.247	0.399
	0.152	0.369	0.725	0.261
	0.165	0.243	0.608	0.617
	0.243	0.2	0.221	0.243
	0.156	0.182	0.135	0.386
	0.243	0.156	0.491	0.217
	0.156	0.365	0.521	0.308
	0.243	0.109	0.178	0.156
	0.399	0.161	0.538	0.269
	0.76	0.087	0.369	0.604
	0.76	0.295	0.473	0.287
	0.321	0.508	0.877	0.617
	0.169	0.326	0.512	0.243
	0.178	0.187	0.547	0.386
	0.187	0.313	0.386	0.217
	0.208	0.452	0.239	0.308
	0.104	0.417	0.695	0.156
	0.36	0.243	0.638	0.269
	0.174	0.104	0.547	0.604
	0.191	0.152	0.478	0.287
	0.378	0.174	0.091	0.43
	0.204	0.243	0.308	0.274
	0.473	0.143	0.213	0.135
	0.365	0.356	0.217	0.23
	0.122	0.117	0.291	0.321
	0.174	0.334	0.178	0.373
	0.33	0.208	0.195	0.243
	0.634	0.525	0.161	0.2
	0.304	0.256	0.447	0.252
	0.308	0.226	0.304	0.886
	0.53	0.213	0.213	0.491
	0.178	0.221	0.195	0.721
	0.521	0.551	0.369	0.104
	0.122	0.23	0.074	0.634
	0.269	0.517	0.369	0.256
	0.404	0.521	0.122	0.182
	0.113	0.595	0.13	0.13
	0.252	0.252	0.269	0.122
	0.378	0.265	0.2	0.295
	0.621	0.247	0.326	0.122
	0.2	0.104	0.261	0.126
	0.23	0.087	0.152	0.221
	0.239	0.187	0.169	0.161
	0.161	0.217	0.265	0.143
	0.326	0.308	0.486	0.182
	0.443	0.282	0.304	0.174
	0.712	0.395	0.421	0.191
	0.421	0.365	0.048	0.334
	0.426	0.938	0.187	0.256
	0.156	0.274	0.291	0.208
	0.243	0.226	0.135	0.2
	0.117	0.56	0.239	0.564
	0.3	0.434	0.265	0.247
	0.195	0.23	0.369	0.347
	0.313	0.66	0.182	0.265
	0.321	0.782	0.595	0.391
	0.161	0.43	0.604	0.247
	0.412	0.66	0.23	0.408
	0.2	0.369	0.2	0.365
	0.226	0.591	0.287	0.512
	0.643	0.226	0.343	0.156
	0.534	0.208	0.617	0.217
	0.612	0.135	0.191	0.156
	0.187	0.456	0.265	0.208
	0.326	0.239	0.33	0.191
	0.295	0.66	0.443	0.117
	0.308	0.139	0.33	0.326
	0.334	0.213	0.191	0.386
	0.378	0.334	1.046	0.226
	0.604	0.247	0.295	0.265
	0.634	0.274	0.3	0.169
	0.36	0.582	0.13	0.365
	0.456	1.455	0.178	0.69
	0.36	0.412	0.109	0.122
	0.261	0.378	0.204	0.195
	0.352	0.308	0.174	0.104
	0.156	0.33	0.139	0.139
	0.269	0.46	0.256	0.074
	0.295	0.287	0.308	0.152
	0.204	0.156	0.36	0.66
	0.256	0.308	0.421	0.499
	0.304	0.326	0.352	0.421
	0.243	0.204	0.265	0.877
	0.243	0.195	0.221	0.382
	0.1	0.756	0.343	0.313
	0.499	0.326	0.764	0.421
	0.135	0.621	0.617	0.643
	0.195	0.399	0.868	0.547
	0.148	0.564	0.664	0.339
	0.742	0.512	0.33	0.122
	0.343	0.582	0.326	0.256
	0.89	0.651	0.3	0.104
	0.208	0.278	0.161	0.473
	0.708	0.191	0.63	0.269
	0.816	0.291	0.404	0.395
	0.369	0.404	0.165	0.925
	0.347	0.161	0.287	0.334
	0.582	0.178	0.091	0.469
	0.447	0.161	0.191	0.777
	0.617	0.204	0.378	0.56
	0.43	0.412	0.2	0.3
	0.925	0.182	0.165	0.135
	0.708	0.412	0.76	0.143
	0.165	0.182	0.139	0.343
	0.834	0.1	0.373	0.525
	0.656	0.769	0.434	0.213
	0.313	0.543	0.664	0.261
	0.287	1.442	0.204	0.2
	0.577	0.955	0.369	0.117
	0.812	0.777	0.265	0.534
	0.756	0.239	0.656	0.287
	0.317	0.217	0.126	0.373
	0.174	0.174	0.608	0.152
	0.729	0.417	0.282	0.239
	0.586	0.412	0.352	0.109
	0.182	0.408	0.599	0.252
	0.499	0.261	0.373	0.178
	0.504	0.213	0.382	0.243
	0.412	0.169	0.326	0.1
	0.408	0.664	0.143	0.243
	0.569	0.816	0.256	0.126
	0.747	0.343	0.304	0.326
	0.261	0.569	0.612	0.256
	0.456		0.751	0.161
	0.96		0.656	0.274
	0.439		0.36	0.13
	1.025		0.664	0.178
	1.155		0.426
	0.508		0.369
	0.795		0.695
	0.86		0.478
	0.452		0.721
	0.191		0.439
	0.208		0.721
	0.239		0.161
	0.452		0.334
	0.582		0.265
	0.465		0.551
	0.803		0.543
	0.434		0.404
	0.486		0.673
	0.838		0.156
	0.391		0.53
	0.564		0.538
	0.786		0.135
	0.13		0.274
	0.96		0.243
	0.247		0.252
	0.621		0.156
	0.56		0.399
	0.117		0.169
	0.317		0.117
	0.478		0.174
	0.669		0.373
	0.599		0.104
	0.352		0.143
	0.36		0.378
	0.178		0.252
	0.265		0.23
	0.113		0.373
	0.217		0.295
	0.287		0.386
	0.638		0.873
	0.521		0.521
	0.738		0.33
	0.786		0.247
	0.469
	0.161
	0.308
	0.304
	0.234
	0.33
	0.881
	0.265
	0.234
	0.382
	0.247
	0.182
	0.252
	0.239
	0.686
	0.842
	0.191

## Sheet: Fig2D
Control				VAPA KO				VAPA KO+Ch-VAPA				VAPA KO+Ch-VAPA KDMD
Distance to origin (mm)	Normalized Cortactin grey values	Smoothed		Distance to origin (mm)	Normalized Cortactin grey values	Smoothed		Distance to origin (mm)	Normalized Cortactin grey values	Smoothed		Distance to origin (mm)	Normalized Cortactin grey values	Smoothed
0	0.0536151	0.0556572		0	0.0375123	0.0319829		0	0.0492	0.0669946		0	0.0503419	0.0621724
0.089	0.0661895	0.0557444		0.089	0.0289899	0.0318347		0.066	0.0602624	0.0671147		0.066	0.0545457	0.0623409
0.179	0.0590869	0.0559923		0.179	0.0399239	0.0316956		0.132	0.074758	0.067228		0.132	0.0614477	0.0624613
0.268	0.0534254	0.0562875		0.268	0.0426059	0.031534		0.198	0.0850694	0.0673046		0.198	0.0656308	0.0624906
0.358	0.0283261	0.0568827		0.358	0.0475992	0.0313865		0.264	0.080278	0.0673691		0.264	0.0729867	0.0625304
0.447	0.0187234	0.0578905		0.447	0.0385419	0.0311981		0.329	0.0836027	0.0674612		0.329	0.072146	0.062589
0.537	0.0332641	0.0590401		0.537	0.0351735	0.0308937		0.395	0.0860042	0.0675907		0.395	0.0728469	0.0626021
0.626	0.0561152	0.0604101		0.626	0.0191433	0.0306352		0.461	0.0914802	0.0677229		0.461	0.0610878	0.0625316
0.716	0.0930867	0.0617138		0.716	0.0285212	0.0304336		0.527	0.0970513	0.0678221		0.527	0.0670759	0.0625926
0.805	0.0905671	0.0626977		0.805	0.0342217	0.0302131		0.593	0.104021	0.0678834		0.593	0.0813041	0.0627002
0.895	0.102507	0.0639269		0.895	0.0191584	0.0300669		0.659	0.10736	0.0679506		0.659	0.0985239	0.0627551
0.984	0.109828	0.0649836		0.984	0.0191659	0.0298744		0.725	0.107595	0.0679692		0.725	0.0929296	0.0627506
1.074	0.0995035	0.0658185		1.074	0.0329585	0.0296982		0.791	0.106391	0.0679936		0.791	0.0513641	0.0628019
1.163	0.0715655	0.0666071		1.163	0.0310316	0.0294807		0.857	0.103888	0.0681039		0.857	0.0308945	0.0628775
1.253	0.048117	0.0674038		1.253	0.0215499	0.0291902		0.923	0.0981516	0.0683026		0.923	0.0134511	0.0629795
1.342	0.0444486	0.0681346		1.342	0.0208928	0.0288704		0.988	0.0919267	0.0685192		0.988	0.0174776	0.0630863
1.432	0.0541099	0.0689751		1.432	0.0258525	0.0286542		1.054	0.0859415	0.0688219		1.054	0.0194566	0.0631392
1.521	0.0622338	0.0699443		1.521	0.0174666	0.0283519		1.12	0.0917503	0.0691768		1.12	0.0267501	0.0632279
1.611	0.0475369	0.0708435		1.611	0.0041804	0.0280079		1.186	0.0937547	0.0695157		1.186	0.0457551	0.0632968
1.7	0.0587056	0.0714838		1.7	0.00474376	0.0276968		1.252	0.0906707	0.0698264		1.252	0.0659185	0.0632657
1.79	0.084163	0.0718426		1.79	0.00916106	0.027467		1.318	0.0874346	0.0700955		1.318	0.0845742	0.0632013
1.879	0.0737819	0.0720527		1.879	0.0176943	0.0272234		1.384	0.0870634	0.0703153		1.384	0.0828457	0.0631051
1.969	0.070537	0.0721466		1.969	0.0261547	0.0269872		1.45	0.082625	0.0705323		1.45	0.084531	0.0629725
2.058	0.0941416	0.0719604		2.058	0.0365446	0.0266622		1.516	0.0768432	0.0707432		1.516	0.0633547	0.0628416
2.148	0.124863	0.0718844		2.148	0.0339354	0.0264621		1.581	0.0737737	0.0709183		1.581	0.0660123	0.0626878
2.237	0.144746	0.0719971		2.237	0.039559	0.0262739		1.647	0.0667944	0.0710666		1.647	0.0679656	0.0623908
2.327	0.101697	0.0722317		2.327	0.0509123	0.0260337		1.713	0.062945	0.0712317		1.713	0.0840609	0.0619589
2.416	0.116375	0.0723508		2.416	0.0455458	0.0258746		1.779	0.0659304	0.0713996		1.779	0.0901553	0.0613691
2.506	0.112585	0.0726606		2.506	0.0288175	0.0255716		1.845	0.0812644	0.071553		1.845	0.0952115	0.0607633
2.595	0.105313	0.0731758		2.595	0.0082411	0.0254326		1.911	0.095627	0.0717079		1.911	0.0846245	0.06005
2.685	0.1125	0.0738146		2.685	0.0108662	0.0252803		1.977	0.105122	0.0719167		1.977	0.0777856	0.0592947
2.774	0.0925865	0.0745116		2.774	0.0147335	0.0251344		2.043	0.109892	0.07216		2.043	0.0639728	0.0586283
2.864	0.0819375	0.0753412		2.864	0.0186494	0.0248569		2.109	0.109302	0.0725187		2.109	0.0617973	0.058182
2.953	0.0552319	0.0764944		2.953	0.0183054	0.0247202		2.175	0.102538	0.0729621		2.175	0.0668733	0.0577135
3.043	0.0340425	0.0776612		3.043	0.0297199	0.0245435		2.24	0.102785	0.0734935		2.24	0.0654366	0.0571509
3.132	0.0551416	0.0789416		3.132	0.0268202	0.0243849		2.306	0.106183	0.0740746		2.306	0.0697218	0.0566303
3.222	0.0499308	0.0801516		3.222	0.0238519	0.0242322		2.372	0.102396	0.0745785		2.372	0.0747636	0.0561229
3.311	0.0824182	0.0812854		3.311	0.028573	0.0240042		2.438	0.0873977	0.0750577		2.438	0.0918971	0.0556461
3.401	0.0862092	0.0821428		3.401	0.0247928	0.0237762		2.504	0.0773098	0.0754889		2.504	0.0963623	0.0550185
3.49	0.0842851	0.0827974		3.49	0.0241373	0.0235686		2.57	0.0735725	0.0758202		2.57	0.101765	0.0543308
3.58	0.0770922	0.083563		3.58	0.0167024	0.0232789		2.636	0.0705932	0.0761282		2.636	0.122419	0.0536836
3.669	0.0821291	0.084699		3.669	0.00864792	0.0227518		2.702	0.0586547	0.0763251		2.702	0.145762	0.0530678
3.759	0.0754609	0.0860241		3.759	0.00582276	0.0221444		2.768	0.0556257	0.0764913		2.768	0.168261	0.0524216
3.848	0.0898436	0.0875423		3.848	0.00902963	0.0215953		2.833	0.0504056	0.0766842		2.833	0.161961	0.0518406
3.938	0.103456	0.0893759		3.938	0.0163918	0.0211319		2.899	0.0549933	0.0767761		2.899	0.128712	0.0514355
4.027	0.140303	0.0915852		4.027	0.00298504	0.0207493		2.965	0.0626898	0.0767922		2.965	0.113735	0.0510746
4.117	0.169058	0.0943154		4.117	0.0144799	0.0204649		3.031	0.066803	0.0767533		3.031	0.07314	0.0509344
4.206	0.164674	0.0974564		4.206	0.0189474	0.0202456		3.097	0.0752175	0.0766332		3.097	0.0710307	0.0508677
4.296	0.156452	0.100847		4.296	0.0079071	0.0200288		3.163	0.0794359	0.0764436		3.163	0.0512706	0.0509756
4.385	0.0969412	0.104246		4.385	0.000218479	0.0196845		3.229	0.0805687	0.0762827		3.229	0.038257	0.0510257
4.475	0.0683809	0.107664		4.475	0.0209698	0.0192188		3.295	0.0784628	0.0762727		3.295	0.0399426	0.0508555
4.564	0.0555673	0.110888		4.564	0.0153563	0.0187885		3.361	0.072292	0.076402		3.361	0.0343799	0.0506054
4.653	0.0572091	0.113965		4.653	0.0167618	0.0184099		3.426	0.0730859	0.0767212		3.426	0.0352343	0.0504032
4.743	0.0728809	0.117499		4.743	0.0389671	0.0178638		3.492	0.0676858	0.077197		3.492	0.0260847	0.0503261
4.832	0.0699805	0.121276		4.832	0.0420476	0.0171442		3.558	0.0623826	0.0777377		3.558	0.0294706	0.0502627
4.922	0.0740529	0.124827		4.922	0.0419463	0.0162016		3.624	0.0619431	0.0782826		3.624	0.0453555	0.0503931
5.011	0.0948279	0.128102		5.011	0.0354531	0.0150308		3.69	0.0639388	0.0788789		3.69	0.0606459	0.050905
5.101	0.11762	0.131459		5.101	0.0364416	0.0140517		3.756	0.0675148	0.0794846		3.756	0.0793564	0.0517905
5.19	0.112008	0.134797		5.19	0.0368376	0.0130482		3.822	0.0726208	0.080077		3.822	0.101892	0.0529961
5.28	0.112622	0.137812		5.28	0.0177479	0.0120664		3.888	0.0748959	0.0807103		3.888	0.0952222	0.0544782
5.369	0.0848348	0.140969		5.369	0.0200063	0.0111596		3.954	0.0781032	0.0813172		3.954	0.0794719	0.0562486
5.459	0.0747836	0.144264		5.459	0.0251058	0.0102954		4.02	0.0780134	0.0819148		4.02	0.0468629	0.0582103
5.548	0.0808173	0.148002		5.548	0.0179965	0.00937361		4.085	0.0730879	0.0826656		4.085	0.0301927	0.06025
5.638	0.108682	0.152313		5.638	0.0395866	0.00827595		4.151	0.0677834	0.0837042		4.151	0.0187311	0.0622988
5.727	0.161219	0.156937		5.727	0.0528159	0.00710843		4.217	0.0664026	0.0849431		4.217	0.00354969	0.0642767
5.817	0.168695	0.161799		5.817	0.0304565	0.005808		4.283	0.067495	0.0863738		4.283	0	0.0661625
5.906	0.170489	0.166844		5.906	0.0306499	0.00456375		4.349	0.0598677	0.088016		4.349	0.00513148	0.0680485
5.996	0.170459	0.172104		5.996	0.0407551	0.00311057		4.415	0.0542407	0.0898105		4.415	0.00500994	0.0699329
6.085	0.154955	0.177619		6.085	0.0415102	0.00147462		4.481	0.0531114	0.0917694		4.481	0.0100649	0.0717853
6.175	0.175022	0.182891		6.175	0.0228901	-0.000143482		4.547	0.0595554	0.0938719		4.547	0.00655171	0.0735721
6.264	0.178574	0.187927		6.264	0.0220036	-0.00168123		4.613	0.0653255	0.0960847		4.613	0.0120859	0.075307
6.354	0.19128	0.193271		6.354	0.0211757	-0.00299282		4.678	0.0632188	0.0982231		4.678	0.0291495	0.0768519
6.443	0.214125	0.198644		6.443	0.0293842	-0.00390542		4.744	0.0722739	0.100228		4.744	0.0549553	0.0783091
6.533	0.205774	0.204183		6.533	0.0162579	-0.00463194		4.81	0.0767771	0.102189		4.81	0.0697857	0.079653
6.622	0.212792	0.209677		6.622	0.000460397	-0.00545321		4.876	0.0917758	0.104108		4.876	0.0803113	0.0810503
6.712	0.242884	0.215239		6.712	0.00821599	-0.00610292		4.942	0.0961159	0.105981		4.942	0.0634734	0.0822585
6.801	0.255785	0.22096		6.801	0.00551304	-0.00667913		5.008	0.108824	0.107935		5.008	0.0565417	0.0833837
6.891	0.261308	0.226757		6.891	0	-0.00764831		5.074	0.111808	0.110049		5.074	0.0453523	0.0844854
6.98	0.296132	0.232333		6.98	0.00753042	-0.00833335		5.14	0.119715	0.112214		5.14	0.0476865	0.085427
7.07	0.250808	0.237748		7.07	0.0148231	-0.00890355		5.206	0.123701	0.114445		5.206	0.0536265	0.0862397
7.159	0.250664	0.243211		7.159	0.0169551	-0.0093521		5.272	0.128834	0.116714		5.272	0.0563355	0.0869174
7.249	0.257306	0.248817		7.249	0.0115827	-0.00969547		5.337	0.129161	0.119		5.337	0.0649697	0.0875672
7.338	0.242294	0.254526		7.338	0.00952519	-0.0101952		5.403	0.131945	0.121276		5.403	0.0716064	0.0882451
7.428	0.244125	0.260057		7.428	0.0122415	-0.0104536		5.469	0.13944	0.123758		5.469	0.0850449	0.0894033
7.517	0.207342	0.265669		7.517	0.00946659	-0.0102567		5.535	0.143488	0.126457		5.535	0.0834932	0.0907472
7.607	0.15193	0.27107		7.607	0.0150022	-0.00957798		5.601	0.141671	0.129151		5.601	0.0806364	0.092512
7.696	0.135679	0.27655		7.696	0.0322713	-0.00832166		5.667	0.138336	0.131999		5.667	0.0875305	0.0943014
7.786	0.10661	0.282008		7.786	0.0254616	-0.00655473		5.733	0.140179	0.134916		5.733	0.100566	0.0961521
7.875	0.120072	0.287254		7.875	0.0167392	-0.00437463		5.799	0.147619	0.138009		5.799	0.08122	0.0980278
7.965	0.172634	0.292494		7.965	0.0193149	-0.00189187		5.865	0.15608	0.141324		5.865	0.0741473	0.099836
8.054	0.140627	0.29785		8.054	0.00772797	0.00089692		5.93	0.158258	0.144803		5.93	0.0819966	0.101531
8.144	0.171157	0.303131		8.144	0.0141819	0.00360401		5.996	0.168869	0.148559		5.996	0.0911832	0.103634
8.233	0.210262	0.308201		8.233	0.0112914	0.00662244		6.062	0.171621	0.15263		6.062	0.0831379	0.105873
8.323	0.223946	0.312899		8.323	0.0171586	0.0101913		6.128	0.162286	0.156888		6.128	0.079613	0.108252
8.412	0.229789	0.317421		8.412	0.0280716	0.0140243		6.194	0.152236	0.161285		6.194	0.0756255	0.11067
8.502	0.247163	0.321747		8.502	0.0327861	0.0182678		6.26	0.152605	0.165926		6.26	0.0748281	0.112972
8.591	0.238262	0.326259		8.591	0.0173971	0.0229507		6.326	0.142549	0.170832		6.326	0.0829358	0.11548
8.681	0.226113	0.331263		8.681	0.0304439	0.0276597		6.392	0.13729	0.175923		6.392	0.0776674	0.118561
8.77	0.24382	0.336576		8.77	0.037262	0.0327658		6.458	0.142239	0.181227		6.458	0.0806841	0.122019
8.86	0.291056	0.341947		8.86	0.0329619	0.0379511		6.524	0.149225	0.186653		6.524	0.0961136	0.126208
8.949	0.343563	0.34743		8.949	0.0211423	0.0433001		6.589	0.158514	0.19213		6.589	0.101945	0.130886
9.039	0.377854	0.353007		9.039	0.0234568	0.048673		6.655	0.169326	0.197729		6.655	0.107795	0.135986
9.128	0.408632	0.358395		9.128	0.0226306	0.0541286		6.721	0.173461	0.203331		6.721	0.11464	0.141289
9.217	0.465815	0.363561		9.217	0.0365329	0.0598716		6.787	0.178269	0.208886		6.787	0.115933	0.146926
9.307	0.465726	0.368697		9.307	0.0183162	0.0659072		6.853	0.187794	0.214411		6.853	0.12114	0.152737
9.396	0.453829	0.374137		9.396	0.0166957	0.0720465		6.919	0.196386	0.219916		6.919	0.14497	0.15875
9.486	0.451887	0.379517		9.486	0.0248037	0.0784241		6.985	0.198631	0.225311		6.985	0.168545	0.164813
9.575	0.486343	0.384379		9.575	0.0129079	0.084984		7.051	0.203124	0.230647		7.051	0.196678	0.171063
9.665	0.475478	0.388971		9.665	0.0349801	0.0916308		7.117	0.210529	0.236036		7.117	0.204298	0.177515
9.754	0.462075	0.393301		9.754	0.0108327	0.0979729		7.182	0.215758	0.241541		7.182	0.22643	0.184034
9.844	0.460783	0.397424		9.844	0.0128844	0.104032		7.248	0.213214	0.247116		7.248	0.239541	0.190296
9.933	0.469528	0.401133		9.933	0.0120164	0.109985		7.314	0.213596	0.252739		7.314	0.233334	0.196588
10.023	0.467294	0.405065		10.023	0.0322479	0.115899		7.38	0.201617	0.258236		7.38	0.20703	0.202743
10.112	0.43579	0.409077		10.112	0.0115987	0.121822		7.446	0.193874	0.26361		7.446	0.216894	0.208836
10.202	0.450492	0.412757		10.202	0.0178282	0.127481		7.512	0.185331	0.268894		7.512	0.23829	0.215172
10.291	0.450425	0.41609		10.291	0.0154183	0.13282		7.578	0.182247	0.274028		7.578	0.239831	0.221425
10.381	0.478492	0.419817		10.381	0.0148248	0.137647		7.644	0.198444	0.27909		7.644	0.245981	0.227593
10.47	0.508476	0.423296		10.47	0.0266076	0.142264		7.71	0.207166	0.284037		7.71	0.249886	0.233521
10.56	0.570258	0.426625		10.56	0.0273584	0.146879		7.776	0.219775	0.28891		7.776	0.281802	0.239263
10.649	0.623231	0.429957		10.649	0.0250573	0.151675		7.841	0.240817	0.293659		7.841	0.301251	0.245
10.739	0.630366	0.433311		10.739	0.038372	0.156782		7.907	0.250933	0.298243		7.907	0.306271	0.250714
10.828	0.598222	0.436514		10.828	0.0760098	0.161883		7.973	0.274929	0.302632		7.973	0.313063	0.256592
10.918	0.592642	0.439616		10.918	0.0911468	0.166804		8.039	0.287592	0.306815		8.039	0.329743	0.262587
11.007	0.586293	0.442551		11.007	0.0857736	0.171775		8.105	0.29202	0.310922		8.105	0.332664	0.268715
11.097	0.560926	0.445377		11.097	0.0761237	0.176721		8.171	0.31625	0.314948		8.171	0.318938	0.274969
11.186	0.525323	0.448084		11.186	0.0669542	0.181605		8.237	0.337637	0.319101		8.237	0.324984	0.28084
11.276	0.465964	0.451002		11.276	0.054845	0.186337		8.303	0.356769	0.323358		8.303	0.304415	0.286451
11.365	0.420914	0.453805		11.365	0.0473891	0.191034		8.369	0.380782	0.327613		8.369	0.305671	0.292068
11.455	0.398464	0.456418		11.455	0.0492491	0.195688		8.434	0.404107	0.332		8.434	0.291602	0.297962
11.544	0.411568	0.458895		11.544	0.0711154	0.199961		8.5	0.413456	0.336461		8.5	0.31258	0.303983
11.634	0.423129	0.460895		11.634	0.0929482	0.204012		8.566	0.404673	0.340955		8.566	0.359313	0.310125
11.723	0.467471	0.462741		11.723	0.0917219	0.208336		8.632	0.397479	0.345398		8.632	0.386448	0.316488
11.813	0.505781	0.464264		11.813	0.0880412	0.212372		8.698	0.382361	0.349718		8.698	0.395239	0.322868
11.902	0.452926	0.465662		11.902	0.117838	0.216668		8.764	0.371871	0.353978		8.764	0.392692	0.329062
11.992	0.430561	0.46666		11.992	0.149811	0.221183		8.83	0.375043	0.35826		8.83	0.407255	0.33524
12.081	0.478362	0.467155		12.081	0.190765	0.225549		8.896	0.387682	0.362479		8.896	0.39493	0.341187
12.171	0.535623	0.467298		12.171	0.234279	0.230051		8.962	0.393595	0.366564		8.962	0.353504	0.346923
12.26	0.539706	0.467174		12.26	0.215483	0.234701		9.027	0.406203	0.370615		9.027	0.311737	0.352651
12.35	0.559277	0.467197		12.35	0.229305	0.2396		9.093	0.422795	0.374553		9.093	0.276502	0.358362
12.439	0.625846	0.467182		12.439	0.236845	0.244661		9.159	0.43181	0.378397		9.159	0.246403	0.364316
12.529	0.623536	0.467067		12.529	0.236732	0.249624		9.225	0.451505	0.382146		9.225	0.213188	0.370174
12.618	0.621616	0.466822		12.618	0.24184	0.254566		9.291	0.469399	0.385884		9.291	0.193247	0.375769
12.708	0.572717	0.466137		12.708	0.262661	0.259594		9.357	0.463195	0.389515		9.357	0.189598	0.381037
12.797	0.501747	0.465425		12.797	0.302624	0.264676		9.423	0.436191	0.393111		9.423	0.196048	0.386244
12.887	0.467352	0.465003		12.887	0.328175	0.27019		9.489	0.421575	0.396498		9.489	0.214655	0.391536
12.976	0.442646	0.464808		12.976	0.364654	0.27573		9.555	0.407612	0.399618		9.555	0.236967	0.3967
13.066	0.424815	0.464402		13.066	0.37394	0.280775		9.621	0.390024	0.402494		9.621	0.245749	0.401664
13.155	0.400797	0.464229		13.155	0.424482	0.285745		9.686	0.380706	0.405026		9.686	0.254911	0.406517
13.245	0.369136	0.464174		13.245	0.473342	0.29055		9.752	0.368991	0.407249		9.752	0.268878	0.411478
13.334	0.411781	0.464158		13.334	0.493814	0.295264		9.818	0.359843	0.409175		9.818	0.288321	0.416712
13.424	0.454084	0.464184		13.424	0.505957	0.29964		9.884	0.355218	0.410702		9.884	0.306219	0.422033
13.513	0.414668	0.463917		13.513	0.49669	0.303601		9.95	0.378447	0.411876		9.95	0.345793	0.427521
13.603	0.415405	0.46336		13.603	0.461014	0.307089		10.016	0.41133	0.412727		10.016	0.371133	0.433208
13.692	0.394803	0.462545		13.692	0.456851	0.310379		10.082	0.431802	0.413465		10.082	0.401291	0.438974
13.781	0.404955	0.461425		13.781	0.495757	0.313642		10.148	0.452522	0.414208		10.148	0.407068	0.444759
13.871	0.397529	0.460221		13.871	0.495685	0.316884		10.214	0.474483	0.415126		10.214	0.450154	0.450429
13.96	0.375503	0.459275		13.96	0.510873	0.320013		10.279	0.477676	0.416159		10.279	0.478661	0.455798
14.05	0.364217	0.458087		14.05	0.598269	0.323131		10.345	0.469142	0.417325		10.345	0.499219	0.460849
14.139	0.397657	0.456817		14.139	0.585757	0.326566		10.411	0.476454	0.418517		10.411	0.541543	0.465704
14.229	0.422425	0.455654		14.229	0.598979	0.330167		10.477	0.481994	0.419781		10.477	0.580833	0.470616
14.318	0.415354	0.454347		14.318	0.611958	0.333543		10.543	0.49157	0.421103		10.543	0.622684	0.47548
14.408	0.393198	0.452849		14.408	0.628225	0.336892		10.609	0.504882	0.422353		10.609	0.649973	0.480424
14.497	0.388675	0.451182		14.497	0.676553	0.340219		10.675	0.534004	0.423448		10.675	0.674318	0.485444
14.587	0.406283	0.449453		14.587	0.686046	0.343486		10.741	0.535164	0.424428		10.741	0.633609	0.490404
14.676	0.38552	0.447593		14.676	0.655322	0.346638		10.807	0.530658	0.425343		10.807	0.633946	0.495496
14.766	0.387707	0.445306		14.766	0.622017	0.349461		10.873	0.544549	0.426119		10.873	0.601851	0.500369
14.855	0.360295	0.44251		14.855	0.558491	0.351959		10.938	0.5427	0.426674		10.938	0.620922	0.505186
14.945	0.371083	0.439474		14.945	0.508297	0.354297		11.004	0.552763	0.426968		11.004	0.636664	0.509935
15.034	0.420274	0.435896		15.034	0.457663	0.356151		11.07	0.549859	0.427204		11.07	0.645624	0.514685
15.124	0.454717	0.431894		15.124	0.447534	0.357668		11.136	0.539948	0.427557		11.136	0.687055	0.519123
15.213	0.431524	0.428148		15.213	0.432741	0.359197		11.202	0.539916	0.427928		11.202	0.745796	0.523386
15.303	0.451191	0.423985		15.303	0.455018	0.360919		11.268	0.518767	0.428202		11.268	0.730856	0.527463
15.392	0.487513	0.419852		15.392	0.432767	0.362501		11.334	0.487481	0.428455		11.334	0.733881	0.531448
15.482	0.531338	0.416554		15.482	0.387044	0.363962		11.4	0.472718	0.428528		11.4	0.698715	0.535152
15.571	0.527589	0.413464		15.571	0.367098	0.36508		11.466	0.46284	0.42843		11.466	0.697882	0.53866
15.661	0.530171	0.410585		15.661	0.315553	0.366016		11.531	0.432456	0.428157		11.531	0.723146	0.54205
15.75	0.493607	0.407627		15.75	0.265842	0.366769		11.597	0.396583	0.42776		11.597	0.721708	0.545269
15.84	0.422201	0.404283		15.84	0.282558	0.367125		11.663	0.370998	0.427189		11.663	0.661972	0.548484
15.929	0.374397	0.400792		15.929	0.228838	0.367161		11.729	0.351461	0.426414		11.729	0.635371	0.5515
16.019	0.339129	0.397408		16.019	0.21553	0.367107		11.795	0.340633	0.425461		11.795	0.565796	0.554378
16.108	0.319937	0.394248		16.108	0.201922	0.367187		11.861	0.334453	0.424366		11.861	0.532053	0.557225
16.198	0.317239	0.391255		16.198	0.212419	0.367616		11.927	0.316168	0.4231		11.927	0.505986	0.559986
16.287	0.321178	0.388544		16.287	0.218012	0.368358		11.993	0.317302	0.4218		11.993	0.491457	0.562779
16.377	0.336319	0.386426		16.377	0.192011	0.369127		12.059	0.321537	0.420423		12.059	0.458901	0.565662
16.466	0.34981	0.384968		16.466	0.165729	0.370258		12.125	0.320792	0.418998		12.125	0.425458	0.568593
16.556	0.320818	0.383353		16.556	0.153375	0.371343		12.19	0.320551	0.41758		12.19	0.409343	0.571581
16.645	0.335203	0.381925		16.645	0.127543	0.372071		12.256	0.329004	0.41621		12.256	0.414787	0.574576
16.735	0.355118	0.380526		16.735	0.114521	0.372896		12.322	0.332532	0.414811		12.322	0.413378	0.577491
16.824	0.395699	0.379303		16.824	0.0977372	0.373709		12.388	0.325282	0.413372		12.388	0.398836	0.580354
16.914	0.41741	0.37811		16.914	0.127277	0.374594		12.454	0.320469	0.411828		12.454	0.402856	0.582963
17.003	0.427192	0.377132		17.003	0.149173	0.375329		12.52	0.321447	0.410161		12.52	0.439831	0.585484
17.093	0.483462	0.376689		17.093	0.167124	0.376138		12.586	0.320572	0.408317		12.586	0.436872	0.587753
17.182	0.416274	0.376392		17.182	0.176555	0.376738		12.652	0.340967	0.406367		12.652	0.451197	0.58978
17.272	0.376636	0.375778		17.272	0.177952	0.377398		12.718	0.355828	0.404187		12.718	0.465218	0.591289
17.361	0.381409	0.374543		17.361	0.216662	0.377773		12.783	0.359069	0.401852		12.783	0.44018	0.592498
17.451	0.392641	0.373396		17.451	0.276715	0.377999		12.849	0.37798	0.399268		12.849	0.456437	0.593608
17.54	0.333907	0.372156		17.54	0.353317	0.37803		12.915	0.388389	0.396488		12.915	0.479106	0.594412
17.63	0.344311	0.371155		17.63	0.386217	0.378016		12.981	0.397938	0.393633		12.981	0.526532	0.595377
17.719	0.378512	0.370315		17.719	0.39611	0.377885		13.047	0.389294	0.390683		13.047	0.579417	0.596387
17.809	0.361896	0.369805		17.809	0.369179	0.377574		13.113	0.391977	0.387686		13.113	0.593887	0.597575
17.898	0.335497	0.369391		17.898	0.324094	0.377258		13.179	0.406559	0.384702		13.179	0.612234	0.598654
17.988	0.328744	0.369021		17.988	0.318206	0.376847		13.245	0.42676	0.381732		13.245	0.617847	0.599664
18.077	0.326059	0.368012		18.077	0.337306	0.376526		13.311	0.439379	0.378756		13.311	0.634316	0.600344
18.167	0.320976	0.366612		18.167	0.326556	0.376178		13.377	0.441039	0.375693		13.377	0.64807	0.600852
18.256	0.32832	0.365081		18.256	0.3327	0.375747		13.442	0.440699	0.372532		13.442	0.633638	0.601113
18.345	0.336941	0.363145		18.345	0.348574	0.375088		13.508	0.418473	0.369443		13.508	0.668049	0.600928
18.435	0.319377	0.361221		18.435	0.35714	0.374103		13.574	0.401622	0.366269		13.574	0.701787	0.600452
18.524	0.344131	0.358871		18.524	0.37302	0.372798		13.64	0.396555	0.363067		13.64	0.668444	0.599608
18.614	0.34741	0.357047		18.614	0.383601	0.371168		13.706	0.375112	0.359893		13.706	0.63041	0.598433
18.703	0.337994	0.355523		18.703	0.429882	0.369212		13.772	0.357095	0.356789		13.772	0.594765	0.59688
18.793	0.326654	0.353886		18.793	0.456366	0.366955		13.838	0.34122	0.353655		13.838	0.56447	0.595226
18.882	0.295081	0.352388		18.882	0.437003	0.364498		13.904	0.333673	0.350472		13.904	0.531679	0.593689
18.972	0.303251	0.35157		18.972	0.476125	0.361919		13.97	0.332213	0.34724		13.97	0.52065	0.592083
19.061	0.295679	0.351428		19.061	0.439409	0.359185		14.035	0.327134	0.343851		14.035	0.546283	0.590375
19.151	0.344627	0.351519		19.151	0.42892	0.356657		14.101	0.302875	0.340342		14.101	0.535551	0.588501
19.24	0.39245	0.351382		19.24	0.455033	0.35413		14.167	0.289948	0.336786		14.167	0.569579	0.586576
19.33	0.426026	0.351534		19.33	0.435061	0.351714		14.233	0.291667	0.333242		14.233	0.614146	0.584439
19.419	0.465719	0.352287		19.419	0.405185	0.349218		14.299	0.280259	0.329601		14.299	0.628853	0.58187
19.509	0.446444	0.353235		19.509	0.366018	0.34658		14.365	0.281586	0.325766		14.365	0.649148	0.578769
19.598	0.426577	0.354047		19.598	0.337558	0.344056		14.431	0.281559	0.321979		14.431	0.634437	0.575252
19.688	0.421538	0.355493		19.688	0.326944	0.341604		14.497	0.278308	0.318199		14.497	0.641132	0.571305
19.777	0.391661	0.357209		19.777	0.325142	0.338963		14.563	0.262767	0.314468		14.563	0.663194	0.56694
19.867	0.42562	0.359235		19.867	0.309313	0.336401		14.628	0.257468	0.310833		14.628	0.677323	0.562185
19.956	0.414114	0.361445		19.956	0.284657	0.334094		14.694	0.235654	0.306992		14.694	0.666096	0.557113
20.046	0.376982	0.363609		20.046	0.230295	0.331948		14.76	0.238487	0.302873		14.76	0.636485	0.551728
20.135	0.374787	0.365597		20.135	0.227322	0.329731		14.826	0.253789	0.298594		14.826	0.633386	0.546073
20.225	0.394932	0.367443		20.225	0.266821	0.327777		14.892	0.268193	0.294334		14.892	0.652427	0.540021
20.314	0.342198	0.368889		20.314	0.265424	0.3259		14.958	0.289362	0.290258		14.958	0.667079	0.533271
20.404	0.303436	0.36989		20.404	0.287677	0.324278		15.024	0.307307	0.286316		15.024	0.642943	0.525838
20.493	0.259262	0.371105		20.493	0.289361	0.322977		15.09	0.328553	0.282586		15.09	0.597596	0.517684
20.583	0.249083	0.372735		20.583	0.308192	0.321937		15.156	0.373794	0.278906		15.156	0.569952	0.509116
20.672	0.273436	0.374513		20.672	0.356889	0.321169		15.222	0.41324	0.275362		15.222	0.537507	0.500365
20.762	0.307888	0.375932		20.762	0.415973	0.320511		15.287	0.441767	0.27216		15.287	0.510691	0.491769
20.851	0.349813	0.377303		20.851	0.44407	0.319564		15.353	0.450841	0.269431		15.353	0.510355	0.483624
20.941	0.369068	0.378053		20.941	0.42515	0.318501		15.419	0.437802	0.267229		15.419	0.507963	0.475889
21.03	0.371313	0.378687		21.03	0.401173	0.317796		15.485	0.409466	0.265679		15.485	0.521477	0.46849
21.12	0.345503	0.379274		21.12	0.413765	0.317111		15.551	0.378859	0.264636		15.551	0.535255	0.461374
21.209	0.378723	0.379938		21.209	0.400518	0.316376		15.617	0.353186	0.263892		15.617	0.561256	0.454631
21.299	0.381641	0.381028		21.299	0.333259	0.316228		15.683	0.333088	0.263265		15.683	0.56443	0.448141
21.388	0.386458	0.382616		21.388	0.299409	0.315986		15.749	0.310438	0.262847		15.749	0.542048	0.442012
21.478	0.348361	0.384426		21.478	0.323831	0.315873		15.815	0.28491	0.262641		15.815	0.538324	0.436093
21.567	0.361269	0.38629		21.567	0.313361	0.3158		15.88	0.27996	0.262711		15.88	0.511164	0.430787
21.657	0.378517	0.388054		21.657	0.293715	0.315655		15.946	0.282198	0.263084		15.946	0.489347	0.426218
21.746	0.357816	0.389959		21.746	0.28185	0.315582		16.012	0.280868	0.26389		16.012	0.485177	0.422172
21.836	0.364349	0.391907		21.836	0.282511	0.315198		16.078	0.276809	0.264869		16.078	0.458328	0.418011
21.925	0.376432	0.394099		21.925	0.310043	0.314395		16.144	0.280672	0.265941		16.144	0.46829	0.414016
22.015	0.381281	0.396345		22.015	0.346104	0.313607		16.21	0.290757	0.267219		16.21	0.451986	0.409915
22.104	0.384045	0.39795		22.104	0.370386	0.312653		16.276	0.306057	0.268554		16.276	0.44608	0.406144
22.194	0.419696	0.39954		22.194	0.420747	0.311675		16.342	0.296019	0.270072		16.342	0.43577	0.402941
22.283	0.482476	0.401215		22.283	0.448191	0.310338		16.408	0.264407	0.2716		16.408	0.438976	0.400386
22.373	0.485444	0.40334		22.373	0.43443	0.308892		16.474	0.248438	0.273151		16.474	0.433153	0.398723
22.462	0.506302	0.405821		22.462	0.377889	0.307853		16.539	0.243136	0.27469		16.539	0.443248	0.397822
22.552	0.524281	0.408375		22.552	0.388235	0.307387		16.605	0.234482	0.276189		16.605	0.440831	0.397141
22.641	0.430279	0.411334		22.641	0.386658	0.307424		16.671	0.242256	0.27757		16.671	0.449174	0.39676
22.73	0.404506	0.414787		22.73	0.427717	0.307569		16.737	0.236307	0.278929		16.737	0.44877	0.396367
22.82	0.370242	0.418386		22.82	0.451222	0.307836		16.803	0.229802	0.28039		16.803	0.435536	0.39615
22.909	0.391508	0.422018		22.909	0.469612	0.307722		16.869	0.225552	0.28179		16.869	0.432862	0.396223
22.999	0.434586	0.424957		22.999	0.50085	0.307213		16.935	0.21817	0.283078		16.935	0.413161	0.396447
23.088	0.439444	0.427387		23.088	0.550708	0.306659		17.001	0.219645	0.28426		17.001	0.408921	0.396352
23.178	0.437075	0.429355		23.178	0.561246	0.305992		17.067	0.227562	0.285374		17.067	0.403308	0.396312
23.267	0.448387	0.431464		23.267	0.526823	0.30563		17.132	0.23305	0.286447		17.132	0.393757	0.396042
23.357	0.476791	0.433652		23.357	0.450492	0.305495		17.198	0.245769	0.28751		17.198	0.382548	0.395802
23.446	0.472207	0.435907		23.446	0.390992	0.305684		17.264	0.240151	0.288428		17.264	0.352959	0.395502
23.536	0.418086	0.438119		23.536	0.369626	0.305927		17.33	0.234531	0.289332		17.33	0.314203	0.395192
23.625	0.380551	0.4405		23.625	0.311628	0.306246		17.396	0.225478	0.290192		17.396	0.274751	0.394632
23.715	0.409205	0.442907		23.715	0.280454	0.306427		17.462	0.212757	0.291021		17.462	0.236156	0.393837
23.804	0.374652	0.44523		23.804	0.312294	0.306314		17.528	0.192878	0.291823		17.528	0.222826	0.393023
23.894	0.372567	0.447759		23.894	0.285698	0.305858		17.594	0.17803	0.292642		17.594	0.222503	0.392267
23.983	0.386128	0.450594		23.983	0.2542	0.305165		17.66	0.166707	0.293473		17.66	0.223112	0.391434
24.073	0.376728	0.453463		24.073	0.243475	0.304421		17.726	0.168434	0.294224		17.726	0.234209	0.390444
24.162	0.335829	0.456289		24.162	0.218637	0.303778		17.791	0.170875	0.294885		17.791	0.235136	0.389542
24.252	0.256409	0.45933		24.252	0.185073	0.303202		17.857	0.174253	0.295541		17.857	0.252366	0.388901
24.341	0.243866	0.462218		24.341	0.190128	0.302852		17.923	0.169984	0.296116		17.923	0.248756	0.388282
24.431	0.290638	0.464548		24.431	0.175946	0.302293		17.989	0.17185	0.296714		17.989	0.266113	0.387761
24.52	0.355111	0.466227		24.52	0.172577	0.301726		18.055	0.166522	0.297376		18.055	0.286949	0.387262
24.61	0.360478	0.467848		24.61	0.174933	0.301617		18.121	0.174794	0.298029		18.121	0.290176	0.386603
24.699	0.379196	0.469489		24.699	0.175624	0.301842		18.187	0.180734	0.298757		18.187	0.305425	0.385924
24.789	0.377248	0.470735		24.789	0.155308	0.302529		18.253	0.188833	0.299525		18.253	0.254156	0.385271
24.878	0.390373	0.472075		24.878	0.158135	0.303518		18.319	0.193453	0.300326		18.319	0.216943	0.38496
24.968	0.412203	0.473659		24.968	0.159414	0.304504		18.384	0.19585	0.301007		18.384	0.186899	0.385002
25.057	0.464088	0.475014		25.057	0.131184	0.305274		18.45	0.198791	0.301626		18.45	0.187575	0.385071
25.147	0.480228	0.475964		25.147	0.131666	0.305533		18.516	0.191651	0.302273		18.516	0.167949	0.385231
25.236	0.561116	0.476879		25.236	0.129628	0.305604		18.582	0.202333	0.303017		18.582	0.189077	0.385425
25.326	0.633511	0.477889		25.326	0.123619	0.305967		18.648	0.215633	0.303827		18.648	0.197255	0.385698
25.415	0.668258	0.479131		25.415	0.105202	0.306278		18.714	0.223342	0.304642		18.714	0.203442	0.385989
25.505	0.726359	0.480523		25.505	0.103721	0.306844		18.78	0.226491	0.305514		18.78	0.223192	0.386166
25.594	0.711862	0.482038		25.594	0.117359	0.307547		18.846	0.252246	0.306272		18.846	0.239815	0.386391
25.684	0.738279	0.483414		25.684	0.127369	0.308351		18.912	0.269144	0.306923		18.912	0.24158	0.386493
25.773	0.633066	0.484756		25.773	0.143275	0.308889		18.978	0.284485	0.307541		18.978	0.259535	0.386059
25.863	0.580639	0.485839		25.863	0.169499	0.309251		19.043	0.294629	0.30797		19.043	0.270179	0.385095
25.952	0.625533	0.486799		25.952	0.214136	0.310081		19.109	0.30704	0.308282		19.109	0.27432	0.383521
26.042	0.633247	0.487434		26.042	0.246283	0.31089		19.175	0.305054	0.308435		19.175	0.273178	0.381545
26.131	0.592907	0.487785		26.131	0.245236	0.311422		19.241	0.304644	0.30848		19.241	0.282478	0.379319
26.221	0.547644	0.488172		26.221	0.247172	0.312187		19.307	0.312553	0.308408		19.307	0.278926	0.377003
26.31	0.474901	0.488119		26.31	0.229012	0.312619		19.373	0.319965	0.308181		19.373	0.273884	0.374999
26.4	0.499662	0.488036		26.4	0.245563	0.312981		19.439	0.330811	0.307654		19.439	0.268757	0.373288
26.489	0.51841	0.488266		26.489	0.257053	0.313346		19.505	0.343331	0.306898		19.505	0.261259	0.372475
26.579	0.501609	0.488784		26.579	0.302622	0.31363		19.571	0.367196	0.306037		19.571	0.256269	0.372881
26.668	0.493098	0.489399		26.668	0.297172	0.313809		19.636	0.41449	0.304966		19.636	0.264927	0.374186
26.758	0.55098	0.489855		26.758	0.285995	0.313516		19.702	0.431718	0.303892		19.702	0.261754	0.375989
26.847	0.542792	0.489938		26.847	0.275219	0.313315		19.768	0.449253	0.302831		19.768	0.265192	0.377935
26.937	0.52044	0.489743		26.937	0.296969	0.313163		19.834	0.4731	0.301685		19.834	0.262766	0.380107
27.026	0.49132	0.489089		27.026	0.284386	0.313021		19.9	0.489881	0.300342		19.9	0.269422	0.382462
27.116	0.430834	0.488226		27.116	0.261513	0.312502		19.966	0.530079	0.29888		19.966	0.281899	0.384964
27.205	0.378122	0.486991		27.205	0.273071	0.311798		20.032	0.561234	0.297214		20.032	0.305658	0.387588
27.294	0.378199	0.48506		27.294	0.307902	0.310383		20.098	0.588303	0.295483		20.098	0.337077	0.390175
27.384	0.381338	0.482803		27.384	0.305636	0.308463		20.164	0.589531	0.293814		20.164	0.394764	0.392783
27.473	0.429882	0.480632		27.473	0.305062	0.306256		20.229	0.56248	0.292171		20.229	0.488558	0.395579
27.563	0.479751	0.47799		27.563	0.320985	0.3036		20.295	0.550197	0.290602		20.295	0.585666	0.398575
27.652	0.421879	0.47454		27.652	0.327816	0.300706		20.361	0.523523	0.289117		20.361	0.698707	0.401635
27.742	0.406772	0.470458		27.742	0.316583	0.297526		20.427	0.5233	0.287722		20.427	0.776826	0.404305
27.831	0.432914	0.466351		27.831	0.295784	0.29451		20.493	0.515058	0.28659		20.493	0.823316	0.406622
27.921	0.45412	0.462376		27.921	0.27727	0.291756		20.559	0.504128	0.285681		20.559	0.844856	0.408464
28.01	0.468464	0.458704		28.01	0.291106	0.289854		20.625	0.48439	0.284933		20.625	0.809995	0.409711
28.1	0.548935	0.455505		28.1	0.31081	0.288385		20.691	0.444156	0.284228		20.691	0.787796	0.41064
28.189	0.586257	0.452684		28.189	0.303288	0.287185		20.757	0.384677	0.283454		20.757	0.752911	0.41145
28.279	0.596522	0.449892		28.279	0.308479	0.286029		20.823	0.347371	0.282469		20.823	0.765253	0.412439
28.368	0.572953	0.446902		28.368	0.340175	0.285004		20.888	0.321705	0.281227		20.888	0.752068	0.413728
28.458	0.505236	0.444136		28.458	0.351535	0.283809		20.954	0.311069	0.279753		20.954	0.750544	0.415486
28.547	0.469948	0.441297		28.547	0.367068	0.282064		21.02	0.301763	0.278061		21.02	0.756759	0.417474
28.637	0.467777	0.438467		28.637	0.37497	0.280084		21.086	0.290245	0.276126		21.086	0.785759	0.419432
28.726	0.458676	0.435236		28.726	0.397339	0.278213		21.152	0.272553	0.273925		21.152	0.759567	0.421379
28.816	0.456882	0.432136		28.816	0.441211	0.27646		21.218	0.25413	0.271616		21.218	0.700218	0.423316
28.905	0.435008	0.429034		28.905	0.498723	0.274553		21.284	0.232015	0.269248		21.284	0.670158	0.425264
28.995	0.450169	0.425835		28.995	0.578359	0.272465		21.35	0.220298	0.266826		21.35	0.67039	0.427299
29.084	0.395519	0.422617		29.084	0.636414	0.270753		21.416	0.214313	0.264313		21.416	0.669108	0.429334
29.174	0.390836	0.41932		29.174	0.62603	0.269708		21.481	0.209341	0.261735		21.481	0.676241	0.431495
29.263	0.461262	0.415897		29.263	0.610823	0.269095		21.547	0.210905	0.259133		21.547	0.66943	0.433554
29.353	0.476979	0.412816		29.353	0.58457	0.26886		21.613	0.204894	0.256558		21.613	0.623632	0.435602
29.442	0.518207	0.410207		29.442	0.606273	0.269193		21.679	0.211643	0.253864		21.679	0.557511	0.437402
29.532	0.491501	0.408164		29.532	0.631136	0.270049		21.745	0.208896	0.250881		21.745	0.485978	0.439088
29.621	0.419441	0.406031		29.621	0.572641	0.270832		21.811	0.220905	0.247732		21.811	0.45089	0.440722
29.711	0.431224	0.404083		29.711	0.52479	0.271034		21.877	0.215197	0.24449		21.877	0.42311	0.442297
29.8	0.410326	0.402353		29.8	0.440396	0.270819		21.943	0.209452	0.241095		21.943	0.399802	0.44382
29.89	0.383593	0.399913		29.89	0.387693	0.270186		22.009	0.204387	0.237664		22.009	0.383371	0.445327
29.979	0.361027	0.397296		29.979	0.355564	0.269764		22.075	0.184403	0.234107		22.075	0.371669	0.446661
30.069	0.360514	0.394319		30.069	0.365743	0.269993		22.14	0.166525	0.230418		22.14	0.368669	0.447897
30.158	0.429934	0.391373		30.158	0.378061	0.270649		22.206	0.148412	0.226653		22.206	0.35969	0.449175
30.248	0.43579	0.388593		30.248	0.404252	0.271561		22.272	0.137914	0.222761		22.272	0.361419	0.450395
30.337	0.456072	0.385597		30.337	0.369476	0.272861		22.338	0.126073	0.218795		22.338	0.33768	0.45154
30.427	0.395983	0.382465		30.427	0.309351	0.274456		22.404	0.117647	0.214782		22.404	0.310754	0.452548
30.516	0.358255	0.379327		30.516	0.257874	0.276077		22.47	0.108508	0.210745		22.47	0.277124	0.453309
30.606	0.336723	0.3763		30.606	0.214141	0.277152		22.536	0.106338	0.206723		22.536	0.262762	0.453601
30.695	0.337824	0.373246		30.695	0.205066	0.277505		22.602	0.103608	0.202629		22.602	0.250635	0.45345
30.785	0.31817	0.369724		30.785	0.15953	0.277643		22.668	0.10821	0.198454		22.668	0.255599	0.45311
30.874	0.318093	0.365886		30.874	0.143485	0.277309		22.733	0.105963	0.194142		22.733	0.255934	0.452596
30.964	0.290948	0.362261		30.964	0.164089	0.276655		22.799	0.103272	0.189696		22.799	0.240098	0.451757
31.053	0.262014	0.358171		31.053	0.178451	0.276062		22.865	0.102566	0.185076		22.865	0.233606	0.450539
31.143	0.222413	0.353818		31.143	0.189268	0.275388		22.931	0.0978028	0.180319		22.931	0.24052	0.44907
31.232	0.244844	0.349481		31.232	0.168104	0.274767		22.997	0.0955481	0.175479		22.997	0.24634	0.447343
31.322	0.261342	0.34497		31.322	0.169958	0.273978		23.063	0.0968817	0.170619		23.063	0.233561	0.445253
31.411	0.227074	0.340062		31.411	0.170713	0.272939		23.129	0.0910817	0.165736		23.129	0.228457	0.442959
31.501	0.295818	0.334565		31.501	0.143902	0.271718		23.195	0.0945971	0.160874		23.195	0.219602	0.4407
31.59	0.302471	0.328533		31.59	0.174515	0.27033		23.261	0.104317	0.15594		23.261	0.216793	0.438188
31.68	0.349615	0.322798		31.68	0.16753	0.268837		23.327	0.103081	0.150948		23.327	0.225481	0.435611
31.769	0.352115	0.317213		31.769	0.12795	0.267065		23.392	0.101443	0.145877		23.392	0.222501	0.433084
31.858	0.349402	0.311268		31.858	0.129557	0.265427		23.458	0.102925	0.140787		23.458	0.240053	0.430453
31.948	0.337489	0.305454		31.948	0.131014	0.263599		23.524	0.101929	0.135756		23.524	0.258493	0.427862
32.037	0.320104	0.29976		32.037	0.114081	0.261158		23.59	0.101014	0.130776		23.59	0.256205	0.424813
32.127	0.30364	0.294245		32.127	0.12059	0.258536		23.656	0.104788	0.125855		23.656	0.259421	0.42148
32.216	0.307615	0.289023		32.216	0.121747	0.255971		23.722	0.111425	0.120962		23.722	0.274708	0.418049
32.306	0.327313	0.284185		32.306	0.147863	0.253568		23.788	0.116645	0.116072		23.788	0.285529	0.414714
32.395	0.31076	0.279535		32.395	0.164636	0.251574		23.854	0.117793	0.11112		23.854	0.292707	0.411468
32.485	0.277505	0.275467		32.485	0.134236	0.249983		23.92	0.116454	0.106216		23.92	0.304986	0.408204
32.574	0.219111	0.271958		32.574	0.124835	0.248634		23.985	0.113437	0.101429		23.985	0.324535	0.404723
32.664	0.183626	0.268474		32.664	0.0853852	0.247193		24.051	0.0999171	0.0967087		24.051	0.336452	0.401362
32.753	0.152257	0.265595		32.753	0.0723802	0.246078		24.117	0.0892329	0.0920528		24.117	0.374114	0.398272
32.843	0.132833	0.262657		32.843	0.0576149	0.245261		24.183	0.0815902	0.0876326		24.183	0.439794	0.395254
32.932	0.139379	0.259812		32.932	0.105925	0.244762		24.249	0.0736699	0.0833815		24.249	0.503001	0.39225
33.022	0.158955	0.256054		33.022	0.137181	0.244535		24.315	0.0720851	0.0793263		24.315	0.561637	0.389427
33.111	0.145415	0.252043		33.111	0.108742	0.244522		24.381	0.0618863	0.0754168		24.381	0.636006	0.386662
33.201	0.15942	0.248457		33.201	0.13487	0.24474		24.447	0.0590557	0.0716758		24.447	0.686225	0.383886
33.29	0.146152	0.244803		33.29	0.15441	0.24508		24.513	0.0565541	0.0680051		24.513	0.711788	0.38086
33.38	0.123629	0.24101		33.38	0.156418	0.245496		24.579	0.0609359	0.0644143		24.579	0.735966	0.377795
33.469	0.156874	0.237107		33.469	0.167756	0.245935		24.644	0.0678327	0.060928		24.644	0.737598	0.374716
33.559	0.186709	0.232726		33.559	0.165053	0.246393		24.71	0.076718	0.0575742		24.71	0.70626	0.371631
33.648	0.1664	0.228649		33.648	0.188428	0.247176		24.776	0.0859171	0.0543771		24.776	0.627471	0.36888
33.738	0.135787	0.224371		33.738	0.178721	0.248		24.842	0.091505	0.0513499		24.842	0.509217	0.366488
33.827	0.140734	0.219852		33.827	0.161133	0.249204		24.908	0.0999183	0.0485883		24.908	0.406212	0.364307
33.917	0.124984	0.215266		33.917	0.188055	0.250656		24.974	0.0897185	0.0462677		24.974	0.366683	0.362308
34.006	0.139907	0.211159		34.006	0.139327	0.252268		25.04	0.0755573	0.0441757		25.04	0.344084	0.360481
34.096	0.155441	0.206982		34.096	0.113044	0.253776		25.106	0.0728286	0.0423253		25.106	0.329081	0.358653
34.185	0.173223	0.202386		34.185	0.100158	0.255532		25.172	0.0738985	0.0407546		25.172	0.336086	0.356728
34.275	0.218248	0.197449		34.275	0.131598	0.257216		25.237	0.0737983	0.0393958		25.237	0.340806	0.354977
34.364	0.244422	0.192238		34.364	0.124843	0.258663		25.303	0.0692611	0.0384207		25.303	0.323406	0.353334
34.454	0.294127	0.186978		34.454	0.167006	0.260149		25.369	0.0681908	0.037792		25.369	0.309499	0.35208
34.543	0.324285	0.181965		34.543	0.230685	0.261953		25.435	0.0611678	0.0374572		25.435	0.312235	0.351149
34.633	0.31584	0.177071		34.633	0.307764	0.263942		25.501	0.0592878	0.0372955		25.501	0.311793	0.350818
34.722	0.317922	0.172631		34.722	0.371929	0.265836		25.567	0.0575104	0.0371013		25.567	0.305173	0.35136
34.812	0.384446	0.168535		34.812	0.431611	0.267605		25.633	0.0518431	0.0369976		25.633	0.278778	0.352992
34.901	0.420108	0.164125		34.901	0.481152	0.269435		25.699	0.0494141	0.0368481		25.699	0.297367	0.355949
34.991	0.398364	0.159688		34.991	0.481915	0.271263		25.765	0.0462972	0.0368701		25.765	0.32714	0.359882
35.08	0.38846	0.155479		35.08	0.500305	0.273081		25.83	0.0445701	0.0370148		25.83	0.370222	0.364594
35.17	0.363521	0.151709		35.17	0.44257	0.274706		25.896	0.0427657	0.0372437		25.896	0.437668	0.369634
35.259	0.32165	0.148579		35.259	0.416824	0.276471		25.962	0.0395057	0.0374958		25.962	0.491641	0.374463
35.349	0.271154	0.146361		35.349	0.367815	0.278442		26.028	0.0306934	0.0375886		26.028	0.514859	0.379037
35.438	0.25554	0.144638		35.438	0.345547	0.280311		26.094	0.0266948	0.0373638		26.094	0.510045	0.383152
35.528	0.24512	0.14307		35.528	0.346514	0.282189		26.16	0.0259659	0.0369831		26.16	0.487064	0.387178
35.617	0.230749	0.141487		35.617	0.367283	0.284177		26.226	0.0254933	0.0365161		26.226	0.450302	0.390947
35.707	0.231143	0.139522		35.707	0.390549	0.286086		26.292	0.0275668	0.0360713		26.292	0.425909	0.394809
35.796	0.221331	0.13731		35.796	0.398903	0.288083		26.358	0.0302301	0.035657		26.358	0.413734	0.398862
35.886	0.230016	0.135329		35.886	0.414451	0.29023		26.424	0.0329042	0.0352793		26.424	0.415973	0.403289
35.975	0.209191	0.133147		35.975	0.394501	0.292475		26.489	0.0318552	0.0348892		26.489	0.393631	0.407604
36.065	0.21365	0.13109		36.065	0.405645	0.295074		26.555	0.0309203	0.0345178		26.555	0.371198	0.411682
36.154	0.19401	0.12893		36.154	0.428977	0.298401		26.621	0.0257435	0.0341229		26.621	0.353758	0.415749
36.244	0.189886	0.126975		36.244	0.381123	0.302207		26.687	0.0229991	0.0337331		26.687	0.324496	0.420024
36.333	0.200668	0.124642		36.333	0.315013	0.306635		26.753	0.0249238	0.0333926		26.753	0.311672	0.424384
36.422	0.212845	0.122298		36.422	0.2924	0.310947		26.819	0.0271303	0.0330984		26.819	0.306275	0.428707
36.512	0.151879	0.120569		36.512	0.26635	0.315219		26.885	0.027695	0.0328758		26.885	0.296145	0.433048
36.601	0.103511	0.119322		36.601	0.238321	0.319546		26.951	0.0249708	0.0326599		26.951	0.316857	0.437092
36.691	0.0686451	0.118539		36.691	0.193984	0.324144		27.017	0.0257962	0.0325436		27.017	0.331091	0.440815
36.78	0.072663	0.117392		36.78	0.197025	0.32894		27.082	0.022973	0.0324311		27.082	0.326923	0.444143
36.87	0.0539111	0.115946		36.87	0.232775	0.333392		27.148	0.0197844	0.0324492		27.148	0.339422	0.447196
36.959	0.0271133	0.115224		36.959	0.311915	0.337305		27.214	0.0219953	0.0324362		27.214	0.338651	0.450054
37.049	0.0255246	0.114726		37.049	0.382163	0.340419		27.28	0.0236129	0.0324362		27.28	0.342869	0.452757
37.138	0.009649	0.113881		37.138	0.403184	0.342706		27.346	0.0253701	0.0324583		27.346	0.362211	0.455244
37.228	0.0115281	0.112755		37.228	0.341057	0.344554		27.412	0.0278789	0.0323959		27.412	0.357341	0.457475
37.317	0.0101914	0.111779		37.317	0.306169	0.345887		27.478	0.0240123	0.0322699		27.478	0.340907	0.459335
37.407	0.0118686	0.111004		37.407	0.309952	0.346892		27.544	0.0250232	0.0320703		27.544	0.321021	0.461237
37.496	0.0341169	0.11057		37.496	0.313911	0.347525		27.61	0.0272929	0.031801		27.61	0.318137	0.46334
37.586	0.0377926	0.110376		37.586	0.292832	0.347813		27.676	0.0324305	0.0314628		27.676	0.322688	0.465621
37.675	0.0360546	0.110361		37.675	0.265522	0.348091		27.741	0.032842	0.0311016		27.741	0.339476	0.467873
37.765	0.0348863	0.110013		37.765	0.279164	0.348081		27.807	0.0350627	0.0307051		27.807	0.388894	0.469913
37.854	0.0217019	0.109754		37.854	0.334491	0.347728		27.873	0.0326615	0.0302928		27.873	0.416205	0.471745
37.944	0.0240585	0.110177		37.944	0.351522	0.347578		27.939	0.0317615	0.029911		27.939	0.395351	0.473481
38.033	0.018766	0.110775		38.033	0.369552	0.347742		28.005	0.0361757	0.0295787		28.005	0.369029	0.475139
38.123	0	0.111033		38.123	0.390606	0.347981		28.071	0.0364368	0.0292657		28.071	0.364335	0.476749
38.212	0.0199607	0.111008		38.212	0.418482	0.348412		28.137	0.0353948	0.0289682		28.137	0.392479	0.478231
38.302	0.0425831	0.111056		38.302	0.409568	0.349033		28.203	0.0337234	0.0287011		28.203	0.415489	0.479407
38.391	0.040078	0.112116		38.391	0.373981	0.349957		28.269	0.0274617	0.0284448		28.269	0.441388	0.480385
38.481	0.0438013	0.114672		38.481	0.391223	0.350794		28.334	0.0248937	0.028207		28.334	0.495766	0.481235
38.57	0.0491328	0.11793		38.57	0.406635	0.351589		28.4	0.024197	0.0279781		28.4	0.517933	0.481829
38.66	0.0430706	0.12155		38.66	0.402304	0.352367		28.466	0.0183198	0.0277085		28.466	0.522093	0.482694
38.749	0.0958047	0.126188		38.749	0.434704	0.352743		28.532	0.0192534	0.0274648		28.532	0.549446	0.483813
38.839	0.0850813	0.131628		38.839	0.439027	0.353283		28.598	0.0247879	0.0273277		28.598	0.571473	0.485146
38.928	0.117748	0.137974		38.928	0.481344	0.35385		28.664	0.0271711	0.0272033		28.664	0.581444	0.486619
39.018	0.171258	0.144838		39.018	0.468036	0.354356		28.73	0.0350302	0.0270894		28.73	0.598357	0.488086
39.107	0.166698	0.151734		39.107	0.502571	0.355022		28.796	0.0296192	0.0269849		28.796	0.606687	0.489746
39.197	0.144026	0.15814		39.197	0.581664	0.355629		28.862	0.0285436	0.0268813		28.862	0.623729	0.491557
39.286	0.127379	0.164477		39.286	0.621402	0.355929		28.928	0.0235154	0.026781		28.928	0.628001	0.493424
39.376	0.103384	0.171045		39.376	0.625394	0.356009		28.993	0.0213741	0.0267178		28.993	0.610328	0.495167
39.465	0.0971114	0.177995		39.465	0.5833	0.355943		29.059	0.0243643	0.0267154		29.059	0.59401	0.497041
39.555	0.086069	0.185084		39.555	0.531199	0.356241		29.125	0.0277999	0.0267592		29.125	0.557597	0.498998
39.644	0.0829057	0.192062		39.644	0.475742	0.356747		29.191	0.0333495	0.0268437		29.191	0.578412	0.500841
39.734	0.077507	0.198927		39.734	0.439051	0.357015		29.257	0.0323129	0.026934		29.257	0.618162	0.502788
39.823	0.117833	0.205479		39.823	0.438941	0.357434		29.323	0.0343238	0.0270302		29.323	0.606877	0.504926
39.913	0.0966789	0.212126		39.913	0.392467	0.357582		29.389	0.0329937	0.0270534		29.389	0.587248	0.507081
40.002	0.103218	0.218803		40.002	0.36397	0.357683		29.455	0.0296257	0.0270325		29.455	0.595073	0.509474
40.092	0.129025	0.225325		40.092	0.328391	0.357548		29.521	0.0286612	0.0269701		29.521	0.597858	0.512284
40.181	0.174141	0.231708		40.181	0.305324	0.357725		29.586	0.0231915	0.0268828		29.586	0.592824	0.515395
40.271	0.170999	0.238275		40.271	0.301229	0.358069		29.652	0.0208654	0.0267991		29.652	0.599899	0.518795
40.36	0.163617	0.244714		40.36	0.31481	0.358049		29.718	0.0182422	0.0266648		29.718	0.611929	0.522717
40.45	0.194599	0.251177		40.45	0.334303	0.357909		29.784	0.0165117	0.0265251		29.784	0.656374	0.526931
40.539	0.188617	0.257305		40.539	0.327968	0.357606		29.85	0.0153087	0.0263579		29.85	0.681326	0.53127
40.629	0.171682	0.262825		40.629	0.332859	0.357148		29.916	0.0193773	0.026196		29.916	0.691204	0.535475
40.718	0.180353	0.268264		40.718	0.317453	0.356475		29.982	0.0195351	0.0260811		29.982	0.699265	0.539452
40.808	0.168888	0.273694		40.808	0.290088	0.355576		30.048	0.0203084	0.0260442		30.048	0.655856	0.543083
40.897	0.229191	0.278814		40.897	0.300447	0.354361		30.114	0.0216642	0.026089		30.114	0.604817	0.545822
40.986	0.262443	0.283743		40.986	0.295079	0.352955		30.18	0.0210369	0.0261869		30.18	0.577571	0.547525
41.076	0.27874	0.288894		41.076	0.258096	0.351486		30.245	0.0191415	0.0263592		30.245	0.567999	0.548631
41.165	0.281326	0.294409		41.165	0.226902	0.350341		30.311	0.0204792	0.0264667		30.311	0.548243	0.549748
41.255	0.302113	0.300309		41.255	0.234714	0.348792		30.377	0.0210831	0.0264871		30.377	0.56124	0.550921
41.344	0.362749	0.306694		41.344	0.221952	0.346736		30.443	0.0232342	0.0265058		30.443	0.583825	0.551911
41.434	0.406176	0.313173		41.434	0.222777	0.344221		30.509	0.0295095	0.0265268		30.509	0.575807	0.552812
41.523	0.408371	0.319945		41.523	0.237437	0.341802		30.575	0.0347179	0.0265154		30.575	0.584526	0.553799
41.613	0.382453	0.326902		41.613	0.244983	0.339424		30.641	0.0379828	0.0264686		30.641	0.562883	0.554673
41.702	0.364031	0.333977		41.702	0.234646	0.337592		30.707	0.0462054	0.0264122		30.707	0.559933	0.555199
41.792	0.368426	0.341469		41.792	0.207014	0.33644		30.773	0.047269	0.026309		30.773	0.543442	0.555508
41.881	0.369811	0.349191		41.881	0.222469	0.336014		30.838	0.0503096	0.0261758		30.838	0.524256	0.555315
41.971	0.391808	0.357253		41.971	0.25999	0.336454		30.904	0.0487563	0.0260505		30.904	0.478358	0.554704
42.06	0.405925	0.365695		42.06	0.261521	0.337675		30.97	0.0523924	0.0258655		30.97	0.414609	0.553512
42.15	0.419482	0.37432		42.15	0.254092	0.33923		31.036	0.0491793	0.0256389		31.036	0.369588	0.552048
42.239	0.437474	0.38308		42.239	0.236845	0.340851		31.102	0.0447393	0.0253628		31.102	0.322179	0.550441
42.329	0.420625	0.392175		42.329	0.248567	0.342618		31.168	0.0426816	0.0250528		31.168	0.316766	0.548987
42.418	0.36621	0.401223		42.418	0.242524	0.34397		31.234	0.0400394	0.0247162		31.234	0.335327	0.547934
42.508	0.337916	0.409732		42.508	0.232723	0.345188		31.3	0.0429566	0.0243722		31.3	0.371765	0.547232
42.597	0.330597	0.417655		42.597	0.241845	0.346096		31.366	0.0484716	0.0239471		31.366	0.426079	0.546572
42.687	0.348682	0.425381		42.687	0.247018	0.347134		31.431	0.0500629	0.0234811		31.431	0.473037	0.545755
42.776	0.358644	0.433468		42.776	0.264759	0.348087		31.497	0.051661	0.0230294		31.497	0.520457	0.544614
42.866	0.37841	0.440464		42.866	0.291965	0.349024		31.563	0.0512783	0.0226183		31.563	0.527271	0.542841
42.955	0.409492	0.447311		42.955	0.299315	0.350131		31.629	0.0505287	0.0222673		31.629	0.526594	0.540729
43.045	0.402159	0.45418		43.045	0.289888	0.351347		31.695	0.046127	0.0219791		31.695	0.521348	0.538424
43.134	0.453276	0.461249		43.134	0.303226	0.352664		31.761	0.0421171	0.0216952		31.761	0.533043	0.53608
43.224	0.464219	0.468673		43.224	0.300938	0.354003		31.827	0.0317379	0.0214288		31.827	0.528338	0.533619
43.313	0.489659	0.476886		43.313	0.256797	0.355305		31.893	0.0228112	0.0211338		31.893	0.516237	0.531218
43.403	0.506993	0.485307		43.403	0.273814	0.356911		31.959	0.0190934	0.0208277		31.959	0.49997	0.528887
43.492	0.542597	0.49374		43.492	0.249508	0.358054		32.025	0.0139142	0.0205474		32.025	0.499493	0.526435
43.582	0.573469	0.50187		43.582	0.267926	0.358921		32.09	0.00979851	0.0202569		32.09	0.525501	0.523818
43.671	0.587896	0.509944		43.671	0.268898	0.359263		32.156	0.00818545	0.0200243		32.156	0.529397	0.521047
43.761	0.569705	0.517809		43.761	0.242812	0.359435		32.222	0.00856078	0.0199		32.222	0.54004	0.518009
43.85	0.580472	0.525383		43.85	0.230657	0.359424		32.288	0.0077239	0.0198343		32.288	0.53124	0.514968
43.94	0.649662	0.532623		43.94	0.232505	0.358942		32.354	0.0117852	0.019767		32.354	0.524803	0.511854
44.029	0.663596	0.539643		44.029	0.230993	0.358311		32.42	0.0117846	0.0197199		32.42	0.534336	0.508566
44.119	0.606008	0.546497		44.119	0.267065	0.35773		32.486	0.0184295	0.0196547		32.486	0.537628	0.505167
44.208	0.58966	0.552588		44.208	0.303898	0.35745		32.552	0.0182511	0.0195849		32.552	0.538347	0.501525
44.298	0.653111	0.557908		44.298	0.375556	0.357465		32.618	0.0170468	0.0195288		32.618	0.554457	0.497806
44.387	0.712267	0.562314		44.387	0.409792	0.357793		32.683	0.0163459	0.0194717		32.683	0.580956	0.493985
44.477	0.730196	0.566148		44.477	0.499514	0.357557		32.749	0.0137443	0.0194591		32.749	0.634588	0.489833
44.566	0.813922	0.569706		44.566	0.566299	0.356969		32.815	0.0116223	0.0194352		32.815	0.620631	0.485497
44.656	0.816293	0.572735		44.656	0.657392	0.356805		32.881	0.0159545	0.0194216		32.881	0.592392	0.480943
44.745	0.849532	0.575836		44.745	0.685599	0.356521		32.947	0.0185536	0.0194376		32.947	0.539948	0.476159
44.835	0.810873	0.578683		44.835	0.635984	0.356226		33.013	0.0173171	0.0195013		33.013	0.512846	0.471165
44.924	0.870071	0.581118		44.924	0.63413	0.356025		33.079	0.0168758	0.0195923		33.079	0.504263	0.466244
45.014	0.882738	0.582966		45.014	0.646424	0.356146		33.145	0.0203204	0.0196853		33.145	0.513537	0.46167
45.103	0.827863	0.58473		45.103	0.610523	0.356604		33.211	0.0162065	0.0197788		33.211	0.507295	0.457274
45.193	0.827275	0.586603		45.193	0.5183	0.357039		33.277	0.0165479	0.0198925		33.277	0.515494	0.452753
45.282	0.925016	0.58835		45.282	0.487888	0.357449		33.342	0.0146203	0.0200385		33.342	0.514567	0.448068
45.372	0.989668	0.590066		45.372	0.476007	0.357847		33.408	0.0126385	0.0202446		33.408	0.508722	0.443252
45.461	1	0.592109		45.461	0.458315	0.358252		33.474	0.0102946	0.0205147		33.474	0.539276	0.438379
45.55	0.855011	0.594391		45.55	0.419505	0.358525		33.54	0.00662842	0.0208152		33.54	0.56804	0.433321
45.64	0.693602	0.596828		45.64	0.405899	0.358601		33.606	0.0040799	0.0210695		33.606	0.586118	0.428209
45.729	0.641552	0.599589		45.729	0.407838	0.358886		33.672	0.00654128	0.0212761		33.672	0.605654	0.423329
45.819	0.587464	0.603343		45.819	0.405	0.359251		33.738	0.00933618	0.0214377		33.738	0.552904	0.418523
45.908	0.535779	0.607419		45.908	0.432047	0.359413		33.804	0.0115223	0.0215157		33.804	0.496673	0.413672
45.998	0.452957	0.61192		45.998	0.432076	0.359608		33.87	0.00802324	0.0216174		33.87	0.450292	0.408961
46.087	0.392176	0.616327		46.087	0.415312	0.36028		33.935	0.00775199	0.0217836		33.935	0.425346	0.404231
46.177	0.342935	0.62079		46.177	0.376979	0.361599		34.001	0.00733844	0.021968		34.001	0.40986	0.399401
46.266	0.359755	0.62537		46.266	0.344681	0.362789		34.067	0.010241	0.0222408		34.067	0.384395	0.394545
46.356	0.44613	0.629611		46.356	0.344448	0.364098		34.133	0.0120218	0.0224963		34.133	0.36594	0.3897
46.445	0.464474	0.633385		46.445	0.362955	0.366053		34.199	0.0135391	0.0227218		34.199	0.340283	0.384934
46.535	0.436881	0.636593		46.535	0.392518	0.36839		34.265	0.0147762	0.0228859		34.265	0.346588	0.38029
46.624	0.404779	0.639103		46.624	0.406644	0.370864		34.331	0.0155362	0.0229902		34.331	0.326795	0.375698
46.714	0.42385	0.64123		46.714	0.369146	0.373503		34.397	0.0172864	0.0231129		34.397	0.308912	0.371219
46.803	0.444315	0.64298		46.803	0.345316	0.376025		34.463	0.0159027	0.0233475		34.463	0.317426	0.366863
46.893	0.446575	0.644411		46.893	0.340564	0.378505		34.529	0.0171912	0.0236559		34.529	0.29799	0.362785
46.982	0.451531	0.645471		46.982	0.296602	0.380755		34.594	0.0166911	0.0239936		34.594	0.272235	0.35887
47.072	0.414659	0.6465		47.072	0.283989	0.383087		34.66	0.0171785	0.0244001		34.66	0.264976	0.354707
47.161	0.388508	0.646792		47.161	0.262388	0.385224		34.726	0.0156199	0.0247972		34.726	0.250279	0.350051
47.251	0.400209	0.646519		47.251	0.266535	0.38711		34.792	0.0163676	0.0251741		34.792	0.238136	0.345335
47.34	0.435056	0.645804		47.34	0.252201	0.388994		34.858	0.0140084	0.025487		34.858	0.242478	0.340507
47.43	0.435123	0.644475		47.43	0.243196	0.390778		34.924	0.0134824	0.0257193		34.924	0.24607	0.336054
47.519	0.44846	0.642585		47.519	0.254756	0.392512		34.99	0.0121889	0.0258977		34.99	0.232255	0.331719
47.609	0.466458	0.640505		47.609	0.284476	0.39423		35.056	0.0112469	0.0260458		35.056	0.230052	0.327414
47.698	0.511393	0.638213		47.698	0.316593	0.395958		35.122	0.0138584	0.0262743		35.122	0.228664	0.322977
47.788	0.58944	0.635514		47.788	0.330948	0.397537		35.187	0.0186457	0.0265662		35.187	0.265557	0.319309
47.877	0.646196	0.632286		47.877	0.365096	0.398766		35.253	0.0200348	0.0269871		35.253	0.295108	0.31624
47.967	0.691571	0.628679		47.967	0.388146	0.399657		35.319	0.0190479	0.0274934		35.319	0.308659	0.313483
48.056	0.733234	0.62483		48.056	0.453253	0.400216		35.385	0.0181242	0.0280692		35.385	0.355163	0.310558
48.146	0.746869	0.621142		48.146	0.468411	0.400893		35.451	0.0181269	0.0287247		35.451	0.380924	0.307358
48.235	0.73311	0.61744		48.235	0.456292	0.401976		35.517	0.0179643	0.0294535		35.517	0.351579	0.304109
48.325	0.67555	0.613645		48.325	0.430724	0.402989		35.583	0.0200128	0.0301986		35.583	0.289921	0.300956
48.414	0.643497	0.609611		48.414	0.437985	0.404017		35.649	0.0210013	0.03093		35.649	0.234791	0.297636
48.504	0.595768	0.605417		48.504	0.483433	0.404977		35.715	0.020287	0.0316419		35.715	0.221073	0.294372
48.593	0.608277	0.601346		48.593	0.536411	0.40564		35.781	0.0227387	0.0323056		35.781	0.214578	0.291276
48.683	0.619093	0.597353		48.683	0.55293	0.406278		35.846	0.029391	0.0329859		35.846	0.178606	0.287781
48.772	0.628745	0.593038		48.772	0.540523	0.407129		35.912	0.0321307	0.0336716		35.912	0.148746	0.283847
48.862	0.673451	0.588386		48.862	0.501534	0.407975		35.978	0.034439	0.0343819		35.978	0.156716	0.279398
48.951	0.655072	0.583397		48.951	0.464921	0.408786		36.044	0.0362922	0.035105		36.044	0.161394	0.275123
49.041	0.624988	0.577968		49.041	0.436664	0.409363		36.11	0.0407368	0.0357589		36.11	0.206501	0.271053
49.13	0.58646	0.572333		49.13	0.375657	0.41013		36.176	0.0395784	0.0363528		36.176	0.234009	0.267263
49.22	0.606485	0.56674		49.22	0.322752	0.410803		36.242	0.0446395	0.0369481		36.242	0.266981	0.263666
49.309	0.62688	0.561167		49.309	0.327951	0.411155		36.308	0.0502753	0.037583		36.308	0.299862	0.25998
49.399	0.596183	0.555937		49.399	0.325073	0.411168		36.374	0.0565629	0.0382869		36.374	0.326798	0.256391
49.488	0.543701	0.550741		49.488	0.327977	0.410534		36.439	0.0620864	0.039066		36.439	0.32462	0.252665
49.578	0.530907	0.545344		49.578	0.337948	0.40971		36.505	0.066582	0.0399504		36.505	0.311685	0.249008
49.667	0.57272	0.53951		49.667	0.336176	0.4087		36.571	0.0668253	0.0409331		36.571	0.294731	0.245621
49.757	0.612045	0.533269		49.757	0.335851	0.407697		36.637	0.0724913	0.042002		36.637	0.294231	0.242559
49.846	0.626455	0.527027		49.846	0.293799	0.40682		36.703	0.0769896	0.0431185		36.703	0.296229	0.239943
49.936	0.560116	0.521122		49.936	0.30616	0.405852		36.769	0.0765332	0.0442471		36.769	0.304608	0.237708
50.025	0.707885	0.515293		50.025	0.328938	0.40512		36.835	0.0723711	0.0453912		36.835	0.345467	0.235934
50.114	0.731147	0.5095		50.114	0.327369	0.404548		36.901	0.0677443	0.046526		36.901	0.354415	0.234231
50.204	0.717851	0.503846		50.204	0.320252	0.403719		36.967	0.0633102	0.0476566		36.967	0.353556	0.232499
50.293	0.694926	0.497916		50.293	0.321517	0.40266		37.032	0.0678164	0.0487661		37.032	0.343882	0.230748
50.383	0.616274	0.492168		50.383	0.298438	0.401581		37.098	0.0667245	0.0498706		37.098	0.320548	0.229112
50.472	0.492988	0.486635		50.472	0.314798	0.400294		37.164	0.0728068	0.0509474		37.164	0.26853	0.227524
50.562	0.427733	0.480815		50.562	0.292611	0.398334		37.23	0.0720286	0.0519591		37.23	0.217665	0.22602
50.651	0.404247	0.474571		50.651	0.313444	0.396008		37.296	0.0679768	0.0529501		37.296	0.181415	0.224376
50.741	0.442038	0.468371		50.741	0.285372	0.393164		37.362	0.0740434	0.0539528		37.362	0.16662	0.22271
50.83	0.444428	0.462296		50.83	0.336928	0.390452		37.428	0.0703825	0.0550023		37.428	0.156964	0.221275
50.92	0.393703	0.456576		50.92	0.331761	0.38718		37.494	0.0572462	0.0561016		37.494	0.159448	0.219951
51.009	0.363026	0.451204		51.009	0.325249	0.38334		37.56	0.0478686	0.0572587		37.56	0.153614	0.218704
51.099	0.349088	0.446579		51.099	0.344718	0.379204		37.626	0.0508994	0.0584671		37.626	0.152764	0.217275
51.188	0.355177	0.442793		51.188	0.363521	0.37499		37.691	0.0469739	0.0597054		37.691	0.148772	0.21581
51.278	0.328874	0.439733		51.278	0.386717	0.370815		37.757	0.048276	0.0609805		37.757	0.152748	0.214452
51.367	0.38282	0.436535		51.367	0.419067	0.366922		37.823	0.0530572	0.0623041		37.823	0.164123	0.213192
51.457	0.464403	0.43321		51.457	0.447616	0.363611		37.889	0.0546833	0.0636229		37.889	0.155845	0.212103
51.546	0.555682	0.430454		51.546	0.425961	0.361081		37.955	0.0588404	0.0648933		37.955	0.167788	0.211327
51.636	0.615405	0.427997		51.636	0.452398	0.359042		38.021	0.0570574	0.0661625		38.021	0.190827	0.21101
51.725	0.628658	0.425633		51.725	0.473439	0.357727		38.087	0.0572294	0.0674026		38.087	0.180835	0.211312
51.815	0.683984	0.423992		51.815	0.415337	0.356759		38.153	0.0590144	0.0685807		38.153	0.172062	0.211646
51.904	0.671022	0.422752		51.904	0.43916	0.356781		38.219	0.0592711	0.0697215		38.219	0.182	0.211898
51.994	0.688509	0.421557		51.994	0.421249	0.357159		38.284	0.0598444	0.070813		38.284	0.197569	0.21187
52.083	0.725385	0.420483		52.083	0.379403	0.357073		38.35	0.0588357	0.0718012		38.35	0.184212	0.211707
52.173	0.791002	0.420041		52.173	0.343104	0.356871		38.416	0.0635525	0.0727339		38.416	0.16352	0.211658
52.262	0.769816	0.419983		52.262	0.34675	0.35675		38.482	0.063926	0.0736185		38.482	0.147192	0.211714
52.352	0.733798	0.419817		52.352	0.367879	0.356183		38.548	0.0627741	0.0744352		38.548	0.12842	0.21169
52.441	0.724699	0.419833		52.441	0.391854	0.354945		38.614	0.0652117	0.0752422		38.614	0.108666	0.211684
52.531	0.686502	0.420579		52.531	0.418731	0.353543		38.68	0.0592919	0.0760418		38.68	0.105565	0.211668
52.62	0.631756	0.422074		52.62	0.451705	0.35215		38.746	0.0512214	0.0768334		38.746	0.125157	0.211894
52.71	0.591804	0.423709		52.71	0.469854	0.35092		38.812	0.0472074	0.0775735		38.812	0.161522	0.21248
52.799	0.537568	0.424655		52.799	0.470706	0.349704		38.878	0.0499104	0.0783057		38.878	0.183926	0.21317
52.889	0.461751	0.425002		52.889	0.463194	0.348609		38.943	0.0564801	0.0789746		38.943	0.19462	0.213929
52.978	0.282181	0.425225		52.978	0.473886	0.347572		39.009	0.064738	0.0796386		39.009	0.199007	0.214677
53.068	0.186246	0.425443		53.068	0.508364	0.346471		39.075	0.0737683	0.0803179		39.075	0.20444	0.214938
53.157	0.130801	0.425477		53.157	0.546346	0.345548		39.141	0.0736182	0.0809967		39.141	0.206829	0.214889
53.247	0.0882091	0.42517		53.247	0.489588	0.34454		39.207	0.072026	0.0815831		39.207	0.229677	0.214708
53.336	0.0648918	0.42449		53.336	0.444636	0.343589		39.273	0.0744043	0.0820657		39.273	0.254518	0.21453
53.426	0.0532515	0.423335		53.426	0.460305	0.342347		39.339	0.0718967	0.0824734		39.339	0.27734	0.21435
53.515	0.0517428	0.42239		53.515	0.487498	0.341095		39.405	0.0719768	0.08286		39.405	0.287516	0.214145
53.605	0.0501382	0.422463		53.605	0.482428	0.340134		39.471	0.0782589	0.0831892		39.471	0.297594	0.213893
53.694	0.0681063	0.42312		53.694	0.4795	0.339255		39.536	0.0854299	0.0833779		39.536	0.28976	0.21356
53.784	0.0983882	0.423794		53.784	0.477724	0.338484		39.602	0.0954604	0.0833867		39.602	0.269862	0.213245
53.873	0.0982194	0.424048		53.873	0.42357	0.337689		39.668	0.0991818	0.0832142		39.668	0.241375	0.21287
53.963	0.0920032	0.424325		53.963	0.398004	0.336397		39.734	0.0893232	0.0829222		39.734	0.189196	0.212578
54.052	0.0837818	0.425003		54.052	0.353853	0.335316		39.8	0.0872563	0.0825312		39.8	0.169755	0.212244
54.142	0.0806948	0.426031		54.142	0.353719	0.33423		39.866	0.0852486	0.0822415		39.866	0.188066	0.211626
54.231	0.0727302	0.427538		54.231	0.34185	0.333096		39.932	0.080255	0.0819432		39.932	0.218835	0.210866
54.321	0.109617	0.429075		54.321	0.323486	0.332116		39.998	0.0835815	0.0816962		39.998	0.279559	0.210001
54.41	0.149656	0.430428		54.41	0.329435	0.331308		40.064	0.0864774	0.0814447		40.064	0.304558	0.20888
54.5	0.192755	0.431673		54.5	0.288542	0.330609		40.13	0.0985627	0.0811998		40.13	0.334222	0.207736
54.589	0.285127	0.433108		54.589	0.272485	0.329668		40.195	0.108884	0.080974		40.195	0.28305	0.206686
54.678	0.324728	0.434735		54.678	0.26644	0.328633		40.261	0.118608	0.0808055		40.261	0.281997	0.205727
54.768	0.304772	0.436271		54.768	0.273023	0.327665		40.327	0.124711	0.0807072		40.327	0.300488	0.204891
54.857	0.327755	0.437809		54.857	0.282239	0.32687		40.393	0.114979	0.0805645		40.393	0.37889	0.204267
54.947	0.344375	0.439831		54.947	0.289539	0.326309		40.459	0.107995	0.0803683		40.459	0.304491	0.203792
55.036	0.369565	0.442459		55.036	0.33893	0.325904		40.525	0.0961229	0.080123		40.525	0.238633	0.203571
55.126	0.398953	0.445479		55.126	0.367384	0.3256		40.591	0.0865404	0.079841		40.591	0.213178	0.203573
55.215	0.388939	0.448812		55.215	0.382907	0.325547		40.657	0.0796622	0.079536		40.657	0.206838	0.203586
55.305	0.391668	0.452093		55.305	0.368048	0.326006		40.723	0.071518	0.0792735		40.723	0.207407	0.203697
55.394	0.396033	0.455264		55.394	0.29251	0.326587		40.788	0.0619605	0.0790821		40.788	0.196401	0.20394
55.484	0.396973	0.458617		55.484	0.253969	0.327134		40.854	0.0593426	0.0790012		40.854	0.180175	0.203933
55.573	0.407432	0.461925		55.573	0.204877	0.32747		40.92	0.0644176	0.0790256		40.92	0.192814	0.203825
55.663	0.425951	0.465004		55.663	0.206181	0.327853		40.986	0.0697577	0.0791579		40.986	0.205492	0.203575
55.752	0.444581	0.467859		55.752	0.220878	0.328475		41.052	0.0812647	0.0793635		41.052	0.212111	0.203485
55.842	0.455987	0.470673		55.842	0.208233	0.32964		41.118	0.0876076	0.079687		41.118	0.275178	0.203719
55.931	0.488384	0.473307		55.931	0.173021	0.331032		41.184	0.0949531	0.0801565		41.184	0.363879	0.204343
56.021	0.496152	0.476303		56.021	0.162451	0.332411		41.25	0.097786	0.0807392		41.25	0.437169	0.204962
56.11	0.51151	0.479931		56.11	0.137967	0.333751		41.316	0.107742	0.0813784		41.316	0.426832	0.205495
56.2	0.567157	0.483476		56.2	0.124356	0.334717		41.382	0.123418	0.0820643		41.382	0.397623	0.206004
56.289	0.586818	0.486902		56.289	0.0886925	0.335328		41.447	0.140358	0.0828271		41.447	0.353071	0.206723
56.379	0.592064	0.490097		56.379	0.118668	0.335338		41.513	0.143845	0.0836251		41.513	0.292112	0.207559
56.468	0.594293	0.493458		56.468	0.148084	0.334864		41.579	0.146941	0.0844757		41.579	0.251903	0.208723
56.558	0.54784	0.496856		56.558	0.172375	0.334082		41.645	0.138635	0.0853714		41.645	0.199357	0.210569
56.647	0.553118	0.499799		56.647	0.234071	0.333487		41.711	0.127641	0.0863373		41.711	0.176704	0.213247
56.737	0.559788	0.502376		56.737	0.257683	0.333135		41.777	0.113832	0.0872855		41.777	0.164095	0.216418
56.826	0.563807	0.504993		56.826	0.263823	0.332844		41.843	0.0997946	0.0881927		41.843	0.145112	0.219695
56.916	0.58957	0.507818		56.916	0.236631	0.332742		41.909	0.0926337	0.0890453		41.909	0.136884	0.223129
57.005	0.575843	0.510919		57.005	0.20988	0.333104		41.975	0.0937713	0.089845		41.975	0.129934	0.226799
57.095	0.536953	0.514038		57.095	0.211525	0.333129		42.04	0.0963595	0.0905897		42.04	0.127619	0.230659
57.184	0.529717	0.516593		57.184	0.176622	0.333452		42.106	0.0984736	0.0913441		42.106	0.115272	0.234551
57.274	0.539763	0.519745		57.274	0.162747	0.334176		42.172	0.10228	0.092043		42.172	0.121665	0.238689
57.363	0.548114	0.522714		57.363	0.192471	0.335227		42.238	0.104922	0.0927764		42.238	0.136425	0.242829
57.453	0.582235	0.525338		57.453	0.202288	0.336041		42.304	0.106291	0.0934911		42.304	0.145431	0.246933
57.542	0.608788	0.527919		57.542	0.203766	0.336651		42.37	0.10533	0.0942421		42.37	0.151876	0.250982
57.632	0.592797	0.529853		57.632	0.21866	0.337036		42.436	0.100904	0.0949392		42.436	0.152079	0.254961
57.721	0.669043	0.53107		57.721	0.261482	0.337357		42.502	0.103006	0.095621		42.502	0.1392	0.258665
57.811	0.762871	0.531869		57.811	0.321743	0.337345		42.568	0.103356	0.0962333		42.568	0.155354	0.261975
57.9	0.809305	0.53258		57.9	0.36532	0.337249		42.633	0.0969793	0.0967087		42.633	0.170151	0.264983
57.99	0.842433	0.533211		57.99	0.355178	0.336995		42.699	0.0858134	0.0969994		42.699	0.174029	0.267846
58.079	0.82697	0.53345		58.079	0.433778	0.337275		42.765	0.0760454	0.0971412		42.765	0.174933	0.270523
58.169	0.779546	0.533152		58.169	0.489304	0.338001		42.831	0.066558	0.0971317		42.831	0.188249	0.273172
58.258	0.699513	0.532689		58.258	0.519441	0.338952		42.897	0.0563296	0.0970404		42.897	0.222019	0.275602
58.348	0.66419	0.531998		58.348	0.532403	0.340282		42.963	0.0538493	0.0968742		42.963	0.236877	0.277948
58.437	0.590545	0.531386		58.437	0.525415	0.341752		43.029	0.0459864	0.0966816		43.029	0.246931	0.28024
58.527	0.572907	0.530311		58.527	0.52083	0.343428		43.095	0.0427799	0.0963753		43.095	0.252957	0.282494
58.616	0.593907	0.529249		58.616	0.473292	0.345364		43.161	0.0405547	0.0959243		43.161	0.245581	0.284703
58.706	0.591905	0.528571		58.706	0.431591	0.347601		43.227	0.0436674	0.0951225		43.227	0.232087	0.286777
58.795	0.629389	0.52817		58.795	0.397168	0.349656		43.292	0.0399751	0.0939354		43.292	0.207404	0.288845
58.885	0.659362	0.527668		58.885	0.384846	0.351922		43.358	0.03822	0.0922688		43.358	0.186504	0.290949
58.974	0.663639	0.527161		58.974	0.409606	0.354538		43.424	0.0416545	0.0901893		43.424	0.185951	0.292795
59.063	0.635988	0.527577		59.063	0.364795	0.356569		43.49	0.0479349	0.0877778		43.49	0.187566	0.29431
59.153	0.693816	0.528209		59.153	0.353312	0.358632		43.556	0.0544582	0.0852669		43.556	0.192998	0.29572
59.242	0.668935	0.529224		59.242	0.386827	0.360465		43.622	0.065498	0.0827747		43.622	0.200514	0.297222
59.332	0.664969	0.530589		59.332	0.415888	0.361961		43.688	0.0703069	0.080235		43.688	0.188633	0.298555
59.421	0.652662	0.532599		59.421	0.43053	0.363219		43.754	0.0780686	0.0777995		43.754	0.195679	0.299561
59.511	0.645169	0.534538		59.511	0.476454	0.364519		43.82	0.0813542	0.07525		43.82	0.215311	0.300363
59.6	0.647328	0.53637		59.6	0.498978	0.365969		43.885	0.0802454	0.0726251		43.885	0.235598	0.300736
59.69	0.667429	0.538075		59.69	0.505351	0.367393		43.951	0.0763157	0.0700335		43.951	0.251544	0.300866
59.779	0.654121	0.539064		59.779	0.503773	0.368658		44.017	0.0721302	0.0675697		44.017	0.224521	0.300754
59.869	0.679304	0.539155		59.869	0.472197	0.369965		44.083	0.0738942	0.0653191		44.083	0.215495	0.300655
59.958	0.670538	0.538821		59.958	0.439886	0.371162		44.149	0.0675323	0.0634125		44.149	0.244801	0.300769
60.048	0.624928	0.53763		60.048	0.414743	0.372194		44.215	0.0703527	0.0623468		44.215	0.270031	0.30084
60.137	0.611907	0.535882		60.137	0.414122	0.373247		44.281	0.0693563	0.0618633		44.281	0.310567	0.300836
60.227	0.575972	0.532503		60.227	0.426961	0.374377		44.347	0.0656551	0.0618874		44.347	0.35093	0.300817
60.316	0.566198	0.528182		60.316	0.434773	0.375944		44.413	0.0636238	0.06228		44.413	0.359987	0.300877
60.406	0.545607	0.52334		60.406	0.45572	0.377639		44.479	0.0696708	0.0631505		44.479	0.350166	0.300787
60.495	0.548855	0.517983		60.495	0.438627	0.379081		44.544	0.0808736	0.0645838		44.544	0.339967	0.30066
60.585	0.577591	0.512315		60.585	0.45108	0.380623		44.61	0.0878788	0.0665972		44.61	0.338758	0.300402
60.674	0.569609	0.506561		60.674	0.426003	0.382291		44.676	0.0903459	0.0687049		44.676	0.330176	0.299854
60.764	0.510731	0.500843		60.764	0.386022	0.383978		44.742	0.0973994	0.0710223		44.742	0.33096	0.298958
60.853	0.448385	0.495529		60.853	0.39626	0.385132		44.808	0.117214	0.0736356		44.808	0.328763	0.297978
60.943	0.423569	0.490422		60.943	0.414823	0.385914		44.874	0.143635	0.0768251		44.874	0.343654	0.296743
61.032	0.45857	0.485291		61.032	0.439731	0.386792		44.94	0.170886	0.0808051		44.94	0.344244	0.295359
61.122	0.478996	0.4797		61.122	0.484787	0.387469		45.006	0.190915	0.0854728		45.006	0.324282	0.293833
61.211	0.444707	0.47423		61.211	0.436063	0.387746		45.072	0.205491	0.0907129		45.072	0.349214	0.29213
61.301	0.398334	0.468822		61.301	0.4379	0.387943		45.137	0.192891	0.0963243		45.137	0.383782	0.290479
61.39	0.333512	0.463491		61.39	0.405259	0.388231		45.203	0.194965	0.102186		45.203	0.390562	0.289056
61.48	0.291161	0.457839		61.48	0.3718	0.38835		45.269	0.18907	0.108307		45.269	0.410468	0.2881
61.569	0.28957	0.452632		61.569	0.324327	0.388358		45.335	0.189518	0.114662		45.335	0.446331	0.28766
61.659	0.314196	0.447926		61.659	0.310894	0.388234		45.401	0.190728	0.121204		45.401	0.450407	0.287675
61.748	0.318666	0.443442		61.748	0.331807	0.38771		45.467	0.186986	0.128031		45.467	0.453475	0.288366
61.838	0.288058	0.439314		61.838	0.335679	0.386743		45.533	0.179195	0.135073		45.533	0.456958	0.289502
61.927	0.312905	0.435333		61.927	0.336321	0.385694		45.599	0.168385	0.142356		45.599	0.437932	0.290732
62.017	0.329898	0.431157		62.017	0.340389	0.384365		45.665	0.175106	0.149794		45.665	0.416178	0.292121
62.106	0.302184	0.427007		62.106	0.338889	0.383097		45.731	0.187208	0.157181		45.731	0.404407	0.294021
62.196	0.290606	0.422967		62.196	0.332204	0.382108		45.796	0.201553	0.164545		45.796	0.415793	0.295389
62.285	0.291717	0.418773		62.285	0.354892	0.381101		45.862	0.211301	0.171914		45.862	0.426147	0.296316
62.375	0.294934	0.414997		62.375	0.345195	0.379965		45.928	0.217045	0.179378		45.928	0.454139	0.29631
62.464	0.351381	0.411348		62.464	0.339597	0.378746		45.994	0.213131	0.186862		45.994	0.504356	0.296308
62.554	0.390737	0.407861		62.554	0.344122	0.377649		46.06	0.20574	0.194276		46.06	0.53178	0.296101
62.643	0.358644	0.40433		62.643	0.344891	0.376001		46.126	0.191953	0.201506		46.126	0.562301	0.295776
62.733	0.313354	0.400755		62.733	0.35778	0.37431		46.192	0.180807	0.208574		46.192	0.536727	0.295318
62.822	0.318439	0.397267		62.822	0.365199	0.372495		46.258	0.167864	0.215659		46.258	0.520868	0.294909
62.912	0.304888	0.394004		62.912	0.382935	0.370714		46.324	0.158005	0.22274		46.324	0.499288	0.294604
63.001	0.323069	0.391162		63.001	0.364447	0.369148		46.389	0.144219	0.229971		46.389	0.458872	0.294324
63.091	0.361788	0.38832		63.091	0.357427	0.367908		46.455	0.130026	0.237275		46.455	0.3761	0.294524
63.18	0.317677	0.385435		63.18	0.357119	0.366657		46.521	0.116478	0.244617		46.521	0.35522	0.295432
63.27	0.267072	0.382273		63.27	0.332365	0.365728		46.587	0.11063	0.251771		46.587	0.3844	0.297078
63.359	0.259526	0.379022		63.359	0.358615	0.364848		46.653	0.105591	0.258849		46.653	0.401935	0.298775
63.449	0.243748	0.376225		63.449	0.389994	0.363953		46.719	0.09841	0.266084		46.719	0.426515	0.300548
63.538	0.233999	0.373999		63.538	0.425073	0.362758		46.785	0.0915693	0.27326		46.785	0.449559	0.302241
63.627	0.22211	0.371796		63.627	0.449458	0.361758		46.851	0.0880705	0.280288		46.851	0.44813	0.303771
63.717	0.230092	0.369725		63.717	0.506429	0.360544		46.917	0.0862788	0.287171		46.917	0.39343	0.305065
63.806	0.260662	0.367494		63.806	0.482044	0.359209		46.983	0.0813028	0.293837		46.983	0.308295	0.30601
63.896	0.25495	0.365248		63.896	0.45395	0.358253		47.048	0.0888813	0.300259		47.048	0.242351	0.3067
63.985	0.225441	0.362971		63.985	0.460543	0.357271		47.114	0.0993106	0.306471		47.114	0.221316	0.307289
64.075	0.225012	0.360744		64.075	0.435699	0.356167		47.18	0.107826	0.312316		47.18	0.186258	0.307834
64.164	0.212928	0.358495		64.164	0.369725	0.354462		47.246	0.121946	0.317984		47.246	0.153553	0.308427
64.254	0.214845	0.356064		64.254	0.380273	0.352511		47.312	0.13582	0.323509		47.312	0.128541	0.309094
64.343	0.222122	0.353354		64.343	0.348853	0.35054		47.378	0.135232	0.328836		47.378	0.13288	0.309754
64.433	0.271334	0.350413		64.433	0.311984	0.348081		47.444	0.14067	0.33397		47.444	0.137751	0.310221
64.522	0.3177	0.347588		64.522	0.260364	0.34526		47.51	0.131814	0.338849		47.51	0.147966	0.310658
64.612	0.353001	0.344905		64.612	0.287064	0.342763		47.576	0.130708	0.343447		47.576	0.153622	0.311063
64.701	0.332638	0.34246		64.701	0.318172	0.340276		47.641	0.130158	0.347936		47.641	0.152485	0.31149
64.791	0.344457	0.340021		64.791	0.328341	0.337858		47.707	0.137693	0.352376		47.707	0.138408	0.31185
64.88	0.318068	0.337423		64.88	0.354163	0.335601		47.773	0.146911	0.356802		47.773	0.123586	0.312155
64.97	0.300065	0.335228		64.97	0.383002	0.333692		47.839	0.157822	0.361358		47.839	0.125308	0.312151
65.059	0.271959	0.333551		65.059	0.41855	0.332449		47.905	0.175997	0.366071		47.905	0.125277	0.311995
65.149	0.30432	0.33225		65.149	0.41704	0.331513		47.971	0.212482	0.370931		47.971	0.121976	0.311536
65.238	0.34985	0.33137		65.238	0.391392	0.33049		48.037	0.235048	0.375692		48.037	0.128926	0.31079
65.328	0.364793	0.330359		65.328	0.321364	0.329959		48.103	0.248969	0.380302		48.103	0.123924	0.309843
65.417	0.342166	0.329145		65.417	0.280859	0.329915		48.169	0.256241	0.384725		48.169	0.139067	0.308972
65.507	0.344794	0.327522		65.507	0.241736	0.329958		48.234	0.275439	0.388965		48.234	0.13865	0.308307
65.596	0.320957	0.325592		65.596	0.237763	0.330251		48.3	0.280933	0.392961		48.3	0.130164	0.307798
65.686	0.346114	0.323225		65.686	0.228452	0.330482		48.366	0.305479	0.396701		48.366	0.126579	0.307349
65.775	0.382008	0.320906		65.775	0.220567	0.330388		48.432	0.339504	0.400011		48.432	0.131629	0.306906
65.865	0.39335	0.319075		65.865	0.203385	0.329944		48.498	0.4035	0.403041		48.498	0.130242	0.306617
65.954	0.43487	0.317266		65.954	0.207633	0.328734		48.564	0.478211	0.406152		48.564	0.129538	0.306411
66.044	0.506545	0.315626		66.044	0.201004	0.326417		48.63	0.564596	0.409399		48.63	0.134125	0.306031
66.133	0.520648	0.314341		66.133	0.167589	0.323308		48.696	0.646553	0.413078		48.696	0.15012	0.305553
66.223	0.437354	0.3132		66.223	0.194358	0.319951		48.762	0.721577	0.416988		48.762	0.178448	0.305003
66.312	0.390042	0.311911		66.312	0.210199	0.316084		48.828	0.763088	0.421051		48.828	0.192647	0.30445
66.402	0.346437	0.31094		66.402	0.223775	0.31229		48.893	0.789167	0.425165		48.893	0.182824	0.303828
66.491	0.326372	0.309849		66.491	0.228534	0.309029		48.959	0.825554	0.429228		48.959	0.183465	0.30297
66.581	0.291208	0.308774		66.581	0.222321	0.306268		49.025	0.84672	0.433124		49.025	0.199615	0.301762
66.67	0.275936	0.307763		66.67	0.213047	0.304101		49.091	0.89856	0.437137		49.091	0.201765	0.300484
66.76	0.248806	0.306669		66.76	0.204808	0.30251		49.157	0.94561	0.441273		49.157	0.234685	0.299138
66.849	0.249466	0.305727		66.849	0.227097	0.301681		49.223	0.982356	0.445251		49.223	0.239309	0.297804
66.939	0.309159	0.304973		66.939	0.273998	0.301658		49.289	0.998246	0.449101		49.289	0.260235	0.296691
67.028	0.379476	0.304137		67.028	0.299306	0.302352		49.355	1	0.452976		49.355	0.266982	0.295625
67.118	0.393421	0.303152		67.118	0.334554	0.303633		49.421	0.986466	0.456907		49.421	0.261391	0.29485
67.207	0.457026	0.302135		67.207	0.362166	0.305326		49.486	0.903863	0.460763		49.486	0.282093	0.294493
67.297	0.452714	0.300749		67.297	0.353617	0.307171		49.552	0.862311	0.464567		49.552	0.297008	0.294453
67.386	0.50226	0.299081		67.386	0.354568	0.309452		49.618	0.832902	0.468353		49.618	0.297569	0.294693
67.476	0.528224	0.297163		67.476	0.325561	0.311941		49.684	0.825036	0.472002		49.684	0.285128	0.29502
67.565	0.530302	0.294905		67.565	0.34722	0.314665		49.75	0.791095	0.475537		49.75	0.304393	0.295405
67.655	0.542995	0.292528		67.655	0.330993	0.317751		49.816	0.741445	0.479002		49.816	0.328481	0.295749
67.744	0.544752	0.290109		67.744	0.269942	0.321021		49.882	0.691249	0.482297		49.882	0.371164	0.296115
67.834	0.523793	0.287807		67.834	0.263519	0.324815		49.948	0.708316	0.485386		49.948	0.438648	0.296424
67.923	0.494681	0.285487		67.923	0.285365	0.328859		50.014	0.710827	0.488354		50.014	0.505712	0.296682
68.013	0.408997	0.282657		68.013	0.359667	0.333068		50.08	0.70647	0.491277		50.08	0.535436	0.296853
68.102	0.370764	0.279531		68.102	0.414274	0.337371		50.145	0.659975	0.494269		50.145	0.574672	0.296848
68.191	0.381086	0.276337		68.191	0.399959	0.341799		50.211	0.581812	0.497434		50.211	0.58673	0.296795
68.281	0.428542	0.27321		68.281	0.376213	0.346427		50.277	0.509723	0.500772		50.277	0.588788	0.29653
68.37	0.383627	0.269714		68.37	0.409168	0.351131		50.343	0.437867	0.504305		50.343	0.571176	0.29594
68.46	0.344258	0.265719		68.46	0.374393	0.35556		50.409	0.400977	0.507901		50.409	0.550446	0.29557
68.549	0.307216	0.260835		68.549	0.356036	0.360255		50.475	0.380254	0.511343		50.475	0.540653	0.295825
68.639	0.324836	0.255269		68.639	0.364438	0.364908		50.541	0.353606	0.514601		50.541	0.508144	0.296321
68.728	0.273214	0.249394		68.728	0.356956	0.369421		50.607	0.336835	0.517539		50.607	0.499501	0.29704
68.818	0.21661	0.243308		68.818	0.377155	0.373511		50.673	0.325845	0.520168		50.673	0.465155	0.298218
68.907	0.205645	0.237797		68.907	0.390575	0.377323		50.738	0.307776	0.522619		50.738	0.401454	0.299438
68.997	0.227116	0.232363		68.997	0.435435	0.381062		50.804	0.297498	0.524807		50.804	0.287844	0.300662
69.086	0.230684	0.226955		69.086	0.436711	0.384781		50.87	0.281384	0.526709		50.87	0.273235	0.301924
69.176	0.226788	0.221977		69.176	0.481522	0.388437		50.936	0.27363	0.528356		50.936	0.268465	0.303171
69.265	0.233033	0.217168		69.265	0.478851	0.391974		51.002	0.279697	0.529895		51.002	0.271857	0.304428
69.355	0.221792	0.211727		69.355	0.441767	0.395295		51.068	0.282939	0.531251		51.068	0.279248	0.305792
69.444	0.260177	0.20606		69.444	0.492352	0.398523		51.134	0.275847	0.532382		51.134	0.278298	0.307657
69.534	0.218441	0.20077		69.534	0.54242	0.4017		51.2	0.255688	0.533428		51.2	0.392078	0.309926
69.623	0.18026	0.195411		69.623	0.57507	0.404661		51.266	0.247388	0.534257		51.266	0.385698	0.312663
69.713	0.148457	0.190646		69.713	0.54678	0.407351		51.332	0.250143	0.534926		51.332	0.418063	0.31595
69.802	0.149216	0.18654		69.802	0.557164	0.409913		51.397	0.26751	0.535286		51.397	0.426343	0.319437
69.892	0.146947	0.182234		69.892	0.525909	0.412521		51.463	0.28843	0.535234		51.463	0.431714	0.323094
69.981	0.13462	0.177789		69.981	0.493735	0.415288		51.529	0.28941	0.534739		51.529	0.438531	0.326741
70.071	0.110241	0.174033		70.071	0.486727	0.418199		51.595	0.293443	0.533958		51.595	0.438373	0.330367
70.16	0.0558242	0.170486		70.16	0.46627	0.421445		51.661	0.279706	0.533046		51.661	0.444155	0.333783
70.25	0.0572195	0.167262		70.25	0.400342	0.42464		51.727	0.27156	0.531755		51.727	0.439632	0.336837
70.339	0.087654	0.164548		70.339	0.3596	0.428042		51.793	0.268781	0.530045		51.793	0.429274	0.339517
70.429	0.131108	0.161572		70.429	0.290791	0.431818		51.859	0.295236	0.527974		51.859	0.400756	0.342184
70.518	0.155973	0.158467		70.518	0.2463	0.435601		51.925	0.312141	0.52583		51.925	0.392081	0.34523
70.608	0.141374	0.155514		70.608	0.220493	0.439468		51.99	0.299592	0.523637		51.99	0.358768	0.348741
70.697	0.0733829	0.152688		70.697	0.213744	0.443504		52.056	0.320559	0.521372		52.056	0.330568	0.352696
70.787	0.072638	0.150102		70.787	0.197894	0.447627		52.122	0.3418	0.519011		52.122	0.294926	0.35702
70.876	0.0521735	0.147781		70.876	0.244739	0.451595		52.188	0.362407	0.516539		52.188	0.287837	0.36138
70.966	0.0253848	0.145777		70.966	0.275261	0.45574		52.254	0.382366	0.513821		52.254	0.283177	0.365426
71.055	0.0274305	0.144099		71.055	0.270182	0.45979		52.32	0.403204	0.510878		52.32	0.292855	0.368788
71.145	0.0338564	0.142467		71.145	0.289709	0.46371		52.386	0.415591	0.507712		52.386	0.288466	0.371553
71.234	0.0258546	0.140948		71.234	0.307676	0.467608		52.452	0.451411	0.50441		52.452	0.268242	0.374055
71.324	0.0513651	0.139469		71.324	0.365375	0.471191		52.518	0.465182	0.50089		52.518	0.243332	0.376098
71.413	0.0625034	0.138499		71.413	0.370556	0.474168		52.584	0.482349	0.497194		52.584	0.214459	0.377777
71.503	0.0625547	0.137545		71.503	0.370134	0.477178		52.649	0.509621	0.493316		52.649	0.201133	0.379133
71.592	0.0867779	0.136463		71.592	0.403975	0.479849		52.715	0.536272	0.489038		52.715	0.205072	0.380285
71.682	0.0772125	0.135829		71.682	0.4408	0.482207		52.781	0.575014	0.484384		52.781	0.203501	0.381438
71.771	0.0621416	0.135485		71.771	0.419082	0.484068		52.847	0.617679	0.479253		52.847	0.210439	0.38263
71.861	0.0590406	0.135526		71.861	0.425992	0.485967		52.913	0.634273	0.473601		52.913	0.204367	0.383797
71.95	0.0851026	0.135682		71.95	0.416015	0.487857		52.979	0.639484	0.467895		52.979	0.208897	0.384808
72.04	0.0947389	0.136249		72.04	0.406093	0.489663		53.045	0.635817	0.462502		53.045	0.205782	0.385598
72.129	0.114094	0.136942		72.129	0.397502	0.491308		53.111	0.616166	0.457567		53.111	0.227466	0.386092
72.219	0.137822	0.137606		72.219	0.359859	0.493043		53.177	0.58974	0.453122		53.177	0.2559	0.386405
72.308	0.138929	0.138135		72.308	0.360814	0.494845		53.242	0.556251	0.449037		53.242	0.307538	0.386507
72.398	0.120863	0.139135		72.398	0.368303	0.496448		53.308	0.553704	0.445331		53.308	0.348188	0.386373
72.487	0.137592	0.140548		72.487	0.379402	0.497674		53.374	0.559492	0.441966		53.374	0.374518	0.386017
72.577	0.131805	0.142122		72.577	0.370747	0.498178		53.44	0.570649	0.438842		53.44	0.372603	0.385615
72.666	0.121892	0.143461		72.666	0.398601	0.498331		53.506	0.579882	0.435715		53.506	0.372784	0.385237
72.755	0.139308	0.145009		72.755	0.386021	0.497957		53.572	0.606481	0.432634		53.572	0.362375	0.384753
72.845	0.136333	0.146386		72.845	0.400186	0.497389		53.638	0.62968	0.429508		53.638	0.361793	0.384062
72.934	0.114759	0.147987		72.934	0.45734	0.496529		53.704	0.684993	0.426459		53.704	0.366148	0.383194
73.024	0.0646844	0.149864		73.024	0.475674	0.49538		53.77	0.719963	0.423633		53.77	0.334072	0.382235
73.113	0.0609801	0.151846		73.113	0.562918	0.493847		53.835	0.706489	0.421226		53.835	0.305464	0.380802
73.203	0.0759007	0.15405		73.203	0.711569	0.49209		53.901	0.67712	0.419344		53.901	0.302702	0.379439
73.292	0.056358	0.156666		73.292	0.840044	0.490171		53.967	0.602878	0.41806		53.967	0.291594	0.378034
73.382	0.0430869	0.159775		73.382	0.92898	0.487795		54.033	0.561908	0.417509		54.033	0.296308	0.37659
73.471	0.040762	0.162709		73.471	0.991052	0.485335		54.099	0.533904	0.417527		54.099	0.293072	0.375115
73.561	0.0548756	0.165644		73.561	1	0.482752		54.165	0.520565	0.41787		54.165	0.304064	0.373513
73.65	0.0527586	0.168201		73.65	0.986309	0.479964		54.231	0.526737	0.418612		54.231	0.343601	0.371682
73.74	0.0504006	0.170781		73.74	0.97461	0.477082		54.297	0.544595	0.4201		54.297	0.382425	0.369567
73.829	0.0318157	0.173316		73.829	0.93481	0.473748		54.363	0.522398	0.422245		54.363	0.399261	0.367378
73.919	0.0395088	0.176056		73.919	0.929982	0.470205		54.429	0.493919	0.42526		54.429	0.430372	0.364955
74.008	0.021154	0.178503		74.008	0.874492	0.466344		54.494	0.502109	0.428953		54.494	0.452264	0.362555
74.098	0.0151135	0.181013		74.098	0.794301	0.462389		54.56	0.503	0.433016		54.56	0.439279	0.360003
74.187	0.0162356	0.184147		74.187	0.716897	0.458622		54.626	0.479247	0.437258		54.626	0.409286	0.357402
74.277	0.0667855	0.187967		74.277	0.625239	0.454853		54.692	0.455909	0.441587		54.692	0.358304	0.354771
74.366	0.0670387	0.192326		74.366	0.554322	0.451075		54.758	0.442491	0.445958		54.758	0.325933	0.352241
74.456	0.0801006	0.19731		74.456	0.526732	0.447302		54.824	0.434119	0.449902		54.824	0.304721	0.349861
74.545	0.112659	0.202229		74.545	0.478599	0.443281		54.89	0.415897	0.453887		54.89	0.305262	0.347549
74.635	0.116946	0.207703		74.635	0.477307	0.439101		54.956	0.411874	0.458043		54.956	0.336941	0.345091
74.724	0.161344	0.213514		74.724	0.466243	0.434483		55.022	0.40539	0.462553		55.022	0.343018	0.342477
74.814	0.161904	0.21982		74.814	0.449257	0.429858		55.087	0.399755	0.467147		55.087	0.345455	0.33972
74.903	0.175053	0.226504		74.903	0.419233	0.425103		55.153	0.414615	0.471667		55.153	0.337241	0.336753
74.993	0.191021	0.233213		74.993	0.365449	0.419839		55.219	0.430869	0.476012		55.219	0.35029	0.333643
75.082	0.191482	0.239845		75.082	0.312729	0.414347		55.285	0.430042	0.4805		55.285	0.354741	0.330478
75.172	0.214111	0.246158		75.172	0.253425	0.408654		55.351	0.422253	0.485058		55.351	0.374464	0.327264
75.261	0.199292	0.252168		75.261	0.252762	0.403232		55.417	0.410002	0.489546		55.417	0.405744	0.323838
75.351	0.185886	0.258012		75.351	0.255551	0.398128		55.483	0.388358	0.493526		55.483	0.436381	0.320291
75.44	0.212953	0.264177		75.44	0.25354	0.392846		55.549	0.367615	0.497037		55.549	0.478881	0.316473
75.53	0.294189	0.270635		75.53	0.291215	0.387288		55.615	0.335616	0.500194		55.615	0.51947	0.312332
75.619	0.34254	0.277037		75.619	0.287777	0.381873		55.681	0.317217	0.502851		55.681	0.52421	0.308277
75.709	0.439478	0.283426		75.709	0.251391	0.376116		55.746	0.303102	0.505253		55.746	0.478415	0.304209
75.798	0.487802	0.289474		75.798	0.223855	0.370088		55.812	0.30716	0.507363		55.812	0.462167	0.300244
75.888	0.502758	0.295403		75.888	0.20765	0.364047		55.878	0.323486	0.508951		55.878	0.461982	0.296212
75.977	0.545066	0.300982		75.977	0.21758	0.357874		55.944	0.344897	0.510017		55.944	0.443139	0.292437
76.067	0.496834	0.305649		76.067	0.238428	0.351651		56.01	0.347337	0.510765		56.01	0.455421	0.288845
76.156	0.503781	0.309941		76.156	0.2634	0.345432		56.076	0.3572	0.511205		56.076	0.473103	0.28512
76.246	0.483426	0.314121		76.246	0.263919	0.339433		56.142	0.366735	0.511368		56.142	0.486461	0.280914
76.335	0.457614	0.318219		76.335	0.266913	0.333379		56.208	0.367817	0.51136		56.208	0.485369	0.276747
76.425	0.464232	0.322518		76.425	0.282133	0.327525		56.274	0.364138	0.511309		56.274	0.476427	0.272867
76.514	0.548822	0.327125		76.514	0.306482	0.321734		56.339	0.377552	0.511467		56.339	0.461967	0.269348
76.604	0.590632	0.331761		76.604	0.306928	0.315589		56.405	0.400291	0.511687		56.405	0.410023	0.266063
76.693	0.555711	0.33658		76.693	0.331049	0.309711		56.471	0.398196	0.512039		56.471	0.370249	0.262925
76.783	0.590504	0.340706		76.783	0.348218	0.304141		56.537	0.412466	0.512318		56.537	0.337039	0.260615
76.872	0.58157	0.344423		76.872	0.377889	0.298905		56.603	0.408227	0.512652		56.603	0.314017	0.258339
76.962	0.54735	0.347821		76.962	0.396934	0.29343		56.669	0.423092	0.51312		56.669	0.321387	0.256185
77.051	0.571038	0.350794		77.051	0.386114	0.288013		56.735	0.447027	0.51379		56.735	0.336928	0.25417
77.141	0.572057	0.353584		77.141	0.370032	0.282333		56.801	0.479256	0.514758		56.801	0.323035	0.252265
77.23	0.497591	0.35591		77.23	0.349979	0.27643		56.867	0.486235	0.515654		56.867	0.318599	0.25052
77.319	0.475056	0.35818		77.319	0.310804	0.270557		56.933	0.472777	0.516631		56.933	0.335692	0.24887
77.409	0.467013	0.359784		77.409	0.291723	0.264505		56.998	0.492281	0.517448		56.998	0.35568	0.247337
77.498	0.452448	0.36113		77.498	0.243377	0.258004		57.064	0.518315	0.51814		57.064	0.332178	0.245814
77.588	0.471056	0.361842		77.588	0.173801	0.251157		57.13	0.536662	0.518691		57.13	0.313248	0.244268
77.677	0.462063	0.362859		77.677	0.13173	0.243692		57.196	0.519717	0.519256		57.196	0.284201	0.242709
77.767	0.452914	0.36412		77.767	0.127864	0.235963		57.262	0.499512	0.51986		57.262	0.229366	0.241088
77.856	0.43871	0.365785		77.856	0.116305	0.228049		57.328	0.479777	0.52032		57.328	0.18304	0.239434
77.946	0.412613	0.367205		77.946	0.121456	0.219969		57.394	0.463964	0.520855		57.394	0.144886	0.237645
78.035	0.379526	0.368698		78.035	0.153357	0.211782		57.46	0.452983	0.521385		57.46	0.130678	0.235688
78.125	0.357632	0.370211		78.125	0.169776	0.203619		57.526	0.464599	0.522004		57.526	0.113418	0.23365
78.214	0.357478	0.371366		78.214	0.1455	0.195508		57.591	0.470621	0.522709		57.591	0.117474	0.231488
78.304	0.363756	0.372406		78.304	0.119952	0.18684		57.657	0.489834	0.523497		57.657	0.124266	0.229327
78.393	0.335322	0.373643		78.393	0.111426	0.178042		57.723	0.500363	0.524289		57.723	0.123859	0.227073
78.483	0.346104	0.374706		78.483	0.11404	0.16916		57.789	0.523016	0.525262		57.789	0.137472	0.22466
78.572	0.273723	0.375614		78.572	0.117264	0.160365		57.855	0.546751	0.52627		57.855	0.137971	0.222023
78.662	0.287957	0.376734		78.662	0.0992439	0.151689		57.921	0.573236	0.527312		57.921	0.138442	0.218939
78.751	0.33084	0.37751		78.751	0.0936639	0.142772		57.987	0.620566	0.528454		57.987	0.150188	0.215538
78.841	0.331024	0.377945		78.841	0.0766787	0.134016		58.053	0.672898	0.529716		58.053	0.131488	0.212052
78.93	0.354191	0.378106		78.93	0.0699292	0.125757		58.119	0.729319	0.531111		58.119	0.111771	0.208608
79.02	0.354285	0.378135		79.02	0.0602601	0.117828		58.185	0.803271	0.532729		58.185	0.0963298	0.205521
79.109	0.339203	0.378059		79.109	0.0627044	0.110509		58.25	0.810148	0.534429		58.25	0.0937172	0.202509
79.199	0.310593	0.378076		79.199	0.0556913	0.103721		58.316	0.770946	0.536117		58.316	0.0867717	0.199665
79.288	0.285492	0.37835		79.288	0.0767691	0.0971612		58.382	0.711137	0.537667		58.382	0.0899882	0.196968
79.378	0.290485	0.379011		79.378	0.0636277	0.090733		58.448	0.647407	0.539034		58.448	0.0920192	0.194679
79.467	0.300592	0.379465		79.467	0.0615793	0.0840312		58.514	0.609815	0.540207		58.514	0.0969041	0.192884
79.557	0.280225	0.379876		79.557	0.062367	0.0773752		58.58	0.588669	0.541098		58.58	0.102482	0.191794
79.646	0.282483	0.380242		79.646	0.0651344	0.0710301		58.646	0.560133	0.541864		58.646	0.116587	0.190869
79.736	0.293331	0.380349		79.736	0.0731788	0.0649313		58.712	0.538495	0.542459		58.712	0.0922378	0.190144
79.825	0.326562	0.379923		79.825	0.0527397	0.0589529		58.778	0.54747	0.542996		58.778	0.0769829	0.18955
79.915	0.318301	0.379517		79.915	0.0582393	0.0534984		58.843	0.562705	0.543484		58.843	0.0656978	0.189164
80.004	0.340258	0.379458		80.004	0.0478344	0.0483057		58.909	0.579638	0.543981		58.909	0.0610506	0.188874
80.094	0.352397	0.379337		80.094	0.0466784	0.0432122		58.975	0.599073	0.544518		58.975	0.0563474	0.188653
80.183	0.369251	0.379222		80.183	0.0459995	0.0384781		59.041	0.608758	0.545217		59.041	0.0472826	0.188727
80.273	0.388404	0.378882		80.273	0.0498668	0.0337782		59.107	0.621546	0.545976		59.107	0.0903484	0.188902
80.362	0.422189	0.378985		80.362	0.0515912	0.0298275		59.173	0.633037	0.546525		59.173	0.0525495	0.18919
80.452	0.460568	0.379288		80.452	0.0326086	0.0269917		59.239	0.64899	0.546766		59.239	0.0363477	0.189671
80.541	0.430849	0.379189		80.541	0.0303812	0.0252278		59.305	0.644141	0.546459		59.305	0.0310745	0.190393
80.631	0.401363	0.378689		80.631	0.0324546	0.0241124		59.371	0.660367	0.545843		59.371	0.0380088	0.191657
80.72	0.377287	0.377791		80.72	0.0306356	0.023243		59.436	0.682438	0.545041		59.436	0.0467478	0.193222
80.81	0.412206	0.376919		80.81	0.0400085	0.0224728		59.502	0.679818	0.544132		59.502	0.0471901	0.195178
80.899	0.409723	0.375974		80.899	0.0242336	0.0218579		59.568	0.635392	0.543184		59.568	0.0667998	0.197605
80.989	0.400841	0.375108		80.989	0.0517176	0.0220081		59.634	0.588374	0.542239		59.634	0.0714045	0.20049
81.078	0.372533	0.374082		81.078	0.0404279	0.0225906		59.7	0.539179	0.541088		59.7	0.0875057	0.203705
81.168	0.406223	0.373047		81.168	0.0464632	0.0240207		59.766	0.513802	0.539659		59.766	0.0967986	0.207201
81.257	0.414329	0.371756		81.257	0.0501908	0.0258989		59.832	0.524892	0.53829		59.832	0.105914	0.210966
81.347	0.398258	0.37		81.347	0.0381585	0.0281205		59.898	0.544768	0.536935		59.898	0.116868	0.214691
81.436	0.385187	0.36803		81.436	0.0341907	0.0303441		59.964	0.564177	0.535372		59.964	0.112037	0.218213
81.526	0.337641	0.366283		81.526	0.0430982	0.0327004		60.03	0.574693	0.533643		60.03	0.0749058	0.221404
81.615	0.326943	0.364616		81.615	0.0439595	0.0351584		60.095	0.584268	0.531782		60.095	0.0561321	0.224362
81.705	0.352437	0.363413		81.705	0.047631	0.0376017		60.161	0.561114	0.529739		60.161	0.0443744	0.22711
81.794	0.339297	0.362316		81.794	0.0475607	0.0398496		60.227	0.527513	0.527528		60.227	0.0508561	0.229829
81.883	0.335427	0.360905		81.883	0.0598541	0.0419709		60.293	0.485033	0.525202		60.293	0.0462427	0.232726
81.973	0.282939	0.359957		81.973	0.0583105	0.0440094		60.359	0.454025	0.522704		60.359	0.0719466	0.235573
82.062	0.256182	0.359497		82.062	0.0378714	0.0460058		60.425	0.427362	0.520046		60.425	0.11523	0.238289
82.152	0.270601	0.359426		82.152	0.0280222	0.0477438		60.491	0.411701	0.517267		60.491	0.170665	0.240982
82.241	0.276678	0.359913		82.241	0.0296018	0.049608		60.557	0.41383	0.514376		60.557	0.242444	0.243871
82.331	0.309579	0.360406		82.331	0.0571746	0.0513467		60.623	0.412057	0.511291		60.623	0.318592	0.246824
82.42	0.280647	0.361137		82.42	0.0694027	0.0531353		60.688	0.423438	0.508004		60.688	0.38712	0.249963
82.51	0.274547	0.361758		82.51	0.0580091	0.0552989		60.754	0.457436	0.504448		60.754	0.455633	0.253512
82.599	0.242134	0.362055		82.599	0.0531524	0.0579444		60.82	0.451351	0.500562		60.82	0.523697	0.257425
82.689	0.250592	0.36241		82.689	0.0532369	0.0608721		60.886	0.430156	0.496378		60.886	0.592806	0.261754
82.778	0.217657	0.362883		82.778	0.0479775	0.0642573		60.952	0.427422	0.491864		60.952	0.582513	0.266421
82.868	0.180109	0.363504		82.868	0.0480696	0.0678083		61.018	0.420088	0.48711		61.018	0.583733	0.271083
82.957	0.191349	0.364822		82.957	0.053673	0.0710741		61.084	0.433104	0.482163		61.084	0.57818	0.275479
83.047	0.223184	0.3663		83.047	0.0479599	0.0739589		61.15	0.474478	0.477138		61.15	0.575281	0.27992
83.136	0.219762	0.367807		83.136	0.0444953	0.0770828		61.216	0.526491	0.472145		61.216	0.546605	0.284434
83.226	0.294225	0.369563		83.226	0.0577815	0.0805026		61.282	0.554508	0.467199		61.282	0.501954	0.288846
83.315	0.33393	0.371172		83.315	0.0574525	0.0843302		61.347	0.574495	0.462178		61.347	0.4725	0.293216
83.405	0.367851	0.372792		83.405	0.0581808	0.0885133		61.413	0.597652	0.45708		61.413	0.441425	0.297422
83.494	0.379992	0.374514		83.494	0.0580108	0.0928049		61.479	0.599168	0.451915		61.479	0.428838	0.301338
83.584	0.341586	0.376228		83.584	0.0647058	0.0968248		61.545	0.589679	0.446593		61.545	0.38777	0.304837
83.673	0.294872	0.37823		83.673	0.0455391	0.101235		61.611	0.555141	0.441079		61.611	0.342878	0.307732
83.763	0.270666	0.381045		83.763	0.0543536	0.105973		61.677	0.539436	0.435529		61.677	0.320341	0.310292
83.852	0.272501	0.384008		83.852	0.0584603	0.110861		61.743	0.501809	0.429984		61.743	0.302449	0.312335
83.942	0.326058	0.386846		83.942	0.0585625	0.116014		61.809	0.480112	0.424359		61.809	0.298995	0.314038
84.031	0.339682	0.390053		84.031	0.0388977	0.121352		61.875	0.449974	0.418762		61.875	0.296549	0.315522
84.121	0.344774	0.393417		84.121	0.0446459	0.126732		61.94	0.417583	0.413083		61.94	0.320821	0.316782
84.21	0.398589	0.396593		84.21	0.0443236	0.132058		62.006	0.388834	0.407412		62.006	0.319749	0.318081
84.3	0.414047	0.400061		84.3	0.0510973	0.137184		62.072	0.348694	0.401829		62.072	0.320386	0.319615
84.389	0.462102	0.403583		84.389	0.0500753	0.142241		62.138	0.34366	0.396359		62.138	0.315187	0.321122
84.479	0.436728	0.406643		84.479	0.0358364	0.147312		62.204	0.317995	0.390813		62.204	0.313034	0.322724
84.568	0.471215	0.409402		84.568	0.0391471	0.152002		62.27	0.309918	0.385082		62.27	0.313338	0.32459
84.658	0.500602	0.412074		84.658	0.0365538	0.156693		62.336	0.301302	0.379454		62.336	0.319664	0.326531
84.747	0.618635	0.414506		84.747	0.0422954	0.161186		62.402	0.300072	0.37395		62.402	0.325141	0.328209
84.837	0.61265	0.417086		84.837	0.0600801	0.165407		62.468	0.305346	0.368514		62.468	0.309827	0.329537
84.926	0.59816	0.419516		84.926	0.0478553	0.169459		62.534	0.298086	0.362949		62.534	0.321177	0.330522
85.016	0.518456	0.42181		85.016	0.0415127	0.173813		62.599	0.288506	0.357194		62.599	0.302483	0.331161
85.105	0.478972	0.424026		85.105	0.0520884	0.17771		62.665	0.279399	0.351231		62.665	0.30305	0.331185
85.195	0.456611	0.426137		85.195	0.0452352	0.181423		62.731	0.283284	0.345075		62.731	0.29969	0.330831
85.284	0.421017	0.428151		85.284	0.0837596	0.185158		62.797	0.273253	0.338751		62.797	0.311373	0.330347
85.374	0.434044	0.430019		85.374	0.10536	0.189059		62.863	0.263268	0.332381		62.863	0.332798	0.329956
85.463	0.439513	0.431975		85.463	0.186104	0.192882		62.929	0.254816	0.325971		62.929	0.350415	0.329621
85.553	0.402031	0.433785		85.553	0.231385	0.196443		62.995	0.250181	0.319602		62.995	0.369397	0.329181
85.642	0.404965	0.435259		85.642	0.271682	0.200019		63.061	0.243302	0.313228		63.061	0.382813	0.328778
85.732	0.439646	0.436958		85.732	0.330568	0.203765		63.127	0.236419	0.306957		63.127	0.401286	0.328481
85.821	0.405478	0.438208		85.821	0.335828	0.207749		63.192	0.233584	0.300755		63.192	0.449949	0.328419
85.911	0.444006	0.439222		85.911	0.392001	0.21199		63.258	0.231577	0.294686		63.258	0.496055	0.328516
86	0.508375	0.440194		86	0.425752	0.216339		63.324	0.22666	0.288975		63.324	0.526327	0.328879
86.09	0.530995	0.440906		86.09	0.414947	0.220792		63.39	0.23281	0.283686		63.39	0.533697	0.329383
86.179	0.526827	0.441234		86.179	0.371376	0.225366		63.456	0.230875	0.278871		63.456	0.502416	0.330094
86.269	0.530369	0.44083		86.269	0.31311	0.229742		63.522	0.224404	0.274588		63.522	0.500311	0.330854
86.358	0.533878	0.440275		86.358	0.248648	0.234068		63.588	0.220813	0.270463		63.588	0.495249	0.331695
86.447	0.496618	0.43934		86.447	0.228605	0.23829		63.654	0.227115	0.26621		63.654	0.485999	0.332687
86.537	0.448368	0.438622		86.537	0.224369	0.242515		63.72	0.223073	0.261654		63.72	0.46272	0.333862
86.626	0.494657	0.4382		86.626	0.252415	0.246409		63.786	0.212844	0.256743		63.786	0.433385	0.335089
86.716	0.494965	0.437533		86.716	0.272258	0.25009		63.851	0.206891	0.25165		63.851	0.396349	0.336354
86.805	0.475457	0.436682		86.805	0.260097	0.25358		63.917	0.207577	0.246481		63.917	0.431238	0.337381
86.895	0.523605	0.436262		86.895	0.262302	0.256962		63.983	0.223376	0.24114		63.983	0.448828	0.33836
86.984	0.592603	0.436386		86.984	0.264721	0.26019		64.049	0.228392	0.235669		64.049	0.449491	0.338894
87.074	0.575435	0.436938		87.074	0.243945	0.263393		64.115	0.230493	0.230265		64.115	0.440376	0.339164
87.163	0.535742	0.437762		87.163	0.222408	0.266669		64.181	0.242022	0.225017		64.181	0.437374	0.339334
87.253	0.536563	0.438787		87.253	0.252988	0.269922		64.247	0.246411	0.219903		64.247	0.448151	0.339313
87.342	0.507476	0.440121		87.342	0.290887	0.273256		64.313	0.26662	0.214968		64.313	0.429962	0.338949
87.432	0.482722	0.44129		87.432	0.342589	0.276648		64.379	0.283795	0.210222		64.379	0.403016	0.338102
87.521	0.400784	0.442709		87.521	0.359886	0.280047		64.444	0.293492	0.205654		64.444	0.3756	0.33739
87.611	0.372166	0.44423		87.611	0.389555	0.283145		64.51	0.301596	0.201262		64.51	0.36074	0.336234
87.7	0.399318	0.446197		87.7	0.412041	0.285886		64.576	0.298762	0.197086		64.576	0.328897	0.334778
87.79	0.43307	0.447518		87.79	0.464107	0.288422		64.642	0.290742	0.192974		64.642	0.266054	0.333383
87.879	0.478845	0.448435		87.879	0.555234	0.290836		64.708	0.27567	0.18905		64.708	0.229191	0.331935
87.969	0.478503	0.44883		87.969	0.619468	0.293334		64.774	0.261911	0.185365		64.774	0.191624	0.33062
88.058	0.477341	0.449263		88.058	0.654349	0.295771		64.84	0.257267	0.181742		64.84	0.170192	0.32925
88.148	0.452566	0.449747		88.148	0.598749	0.29801		64.906	0.258003	0.177906		64.906	0.150121	0.328093
88.237	0.447033	0.45008		88.237	0.562102	0.3002		64.972	0.250097	0.173783		64.972	0.127009	0.326985
88.327	0.444761	0.450252		88.327	0.494974	0.302123		65.037	0.245537	0.16937		65.037	0.12557	0.32599
88.416	0.453792	0.45083		88.416	0.433144	0.303823		65.103	0.225961	0.164897		65.103	0.11692	0.325095
88.506	0.507749	0.451457		88.506	0.356636	0.305299		65.169	0.205639	0.160629		65.169	0.118825	0.324126
88.595	0.532658	0.452004		88.595	0.328598	0.306447		65.235	0.192843	0.156634		65.235	0.12731	0.3232
88.685	0.544054	0.452126		88.685	0.261127	0.307107		65.301	0.172752	0.152856		65.301	0.131979	0.322109
88.774	0.527451	0.451923		88.774	0.213237	0.307575		65.367	0.156114	0.149278		65.367	0.13881	0.320649
88.864	0.465387	0.451859		88.864	0.222986	0.307796		65.433	0.151216	0.145935		65.433	0.152294	0.319096
88.953	0.47696	0.452024		88.953	0.237724	0.307936		65.499	0.133609	0.142546		65.499	0.160235	0.317583
89.043	0.525385	0.45192		89.043	0.288807	0.307814		65.565	0.121534	0.13901		65.565	0.168415	0.316047
89.132	0.498979	0.451647		89.132	0.324437	0.3075		65.631	0.1149	0.135297		65.631	0.186377	0.314476
89.222	0.424276	0.450791		89.222	0.348221	0.307156		65.696	0.107108	0.131434		65.696	0.213558	0.312918
89.311	0.375104	0.44962		89.311	0.39142	0.306647		65.762	0.114161	0.127438		65.762	0.213982	0.311366
89.401	0.301824	0.44823		89.401	0.351341	0.305976		65.828	0.122609	0.123356		65.828	0.202345	0.310102
89.49	0.294462	0.446846		89.49	0.346982	0.305283		65.894	0.126639	0.119336		65.894	0.201693	0.30927
89.58	0.27479	0.445381		89.58	0.30651	0.304782		65.96	0.125113	0.11545		65.96	0.198066	0.308731
89.669	0.269138	0.443504		89.669	0.273161	0.304349		66.026	0.129282	0.111784		66.026	0.172625	0.3088
89.759	0.297123	0.441375		89.759	0.225453	0.303921		66.092	0.132806	0.108504		66.092	0.153147	0.30924
89.848	0.309299	0.4388		89.848	0.201158	0.303498		66.158	0.132143	0.105345		66.158	0.137838	0.310327
89.938	0.370066	0.435928		89.938	0.189816	0.303166		66.224	0.124397	0.102192		66.224	0.132949	0.312052
90.027	0.397542	0.432943		90.027	0.180853	0.302742		66.289	0.11602	0.0991363		66.289	0.144158	0.31408
90.117	0.39443	0.429399		90.117	0.205678	0.30229		66.355	0.104241	0.0960979		66.355	0.14249	0.316271
90.206	0.426629	0.425893		90.206	0.253442	0.301771		66.421	0.0934275	0.0932125		66.421	0.121537	0.318605
90.296	0.446964	0.422878		90.296	0.218495	0.301291		66.487	0.0787355	0.0907421		66.487	0.110707	0.321047
90.385	0.46309	0.420109		90.385	0.19965	0.300633		66.553	0.0679736	0.0887284		66.553	0.106508	0.323335
90.475	0.448162	0.417787		90.475	0.174258	0.299831		66.619	0.0567115	0.0869919		66.619	0.123511	0.325188
90.564	0.463561	0.415643		90.564	0.160455	0.298768		66.685	0.0540279	0.0855348		66.685	0.165493	0.326869
90.654	0.437517	0.413693		90.654	0.158835	0.297688		66.751	0.0501225	0.0843503		66.751	0.223938	0.328546
90.743	0.420462	0.411594		90.743	0.217386	0.296335		66.817	0.0520466	0.0832773		66.817	0.288704	0.330212
90.833	0.390131	0.408954		90.833	0.189031	0.294903		66.883	0.0552204	0.0822471		66.883	0.376167	0.331733
90.922	0.359366	0.406034		90.922	0.178788	0.293103		66.948	0.0525998	0.0810877		66.948	0.419238	0.333219
91.011	0.387347	0.402931		91.011	0.170725	0.291093		67.014	0.0545707	0.0798728		67.014	0.452002	0.334755
91.101	0.379621	0.399994		91.101	0.168724	0.288785		67.08	0.045433	0.0785769		67.08	0.469616	0.336178
91.19	0.366767	0.397433		91.19	0.171571	0.286207		67.146	0.0368855	0.0773322		67.146	0.474565	0.337383
91.28	0.341005	0.394931		91.28	0.209511	0.28338		67.212	0.026972	0.0760445		67.212	0.489801	0.338464
91.369	0.340288	0.392407		91.369	0.25288	0.280463		67.278	0.0228088	0.0746412		67.278	0.495797	0.339854
91.459	0.323996	0.390091		91.459	0.289065	0.277601		67.344	0.0172714	0.0731311		67.344	0.481088	0.341277
91.548	0.320338	0.387888		91.548	0.299851	0.274808		67.41	0.0177703	0.071409		67.41	0.47562	0.342683
91.638	0.316673	0.385963		91.638	0.293288	0.272106		67.476	0.0225188	0.0697385		67.476	0.460579	0.344177
91.727	0.338733	0.383647		91.727	0.325382	0.26917		67.541	0.0240738	0.067957		67.541	0.440976	0.345457
91.817	0.342634	0.381259		91.817	0.319047	0.266386		67.607	0.0158242	0.0662207		67.607	0.453148	0.346581
91.906	0.362701	0.379192		91.906	0.311081	0.263374		67.673	0.0120652	0.064557		67.673	0.472844	0.347767
91.996	0.357372	0.37802		91.996	0.289931	0.260076		67.739	0.0106479	0.0630388		67.739	0.510105	0.349033
92.085	0.369515	0.376806		92.085	0.277508	0.256585		67.805	0.00349864	0.0616533		67.805	0.536439	0.350242
92.175	0.378786	0.375433		92.175	0.230044	0.252991		67.871	0.00236855	0.0603142		67.871	0.536286	0.351403
92.264	0.373847	0.373636		92.264	0.288407	0.249356		67.937	0.00392022	0.0589881		67.937	0.584049	0.352496
92.354	0.359391	0.371546		92.354	0.323867	0.245667		68.003	0.00761709	0.0576621		68.003	0.604066	0.35353
92.443	0.334877	0.36958		92.443	0.356432	0.241908		68.069	0.0124254	0.0564309		68.069	0.610778	0.354608
92.533	0.326718	0.36754		92.533	0.353148	0.238409		68.135	0.0226061	0.0552204		68.135	0.579956	0.355839
92.622	0.304031	0.365652		92.622	0.345087	0.23534		68.2	0.0279516	0.0540264		68.2	0.575363	0.357288
92.712	0.322692	0.363719		92.712	0.362151	0.232628		68.266	0.0356087	0.0529018		68.266	0.598392	0.358823
92.801	0.335113	0.36134		92.801	0.353842	0.230054		68.332	0.043172	0.0518805		68.332	0.593619	0.360627
92.891	0.301634	0.3589		92.891	0.332409	0.227879		68.398	0.048235	0.0508969		68.398	0.592838	0.362371
92.98	0.28368	0.356747		92.98	0.300175	0.226112		68.464	0.0613386	0.0499667		68.464	0.559139	0.364237
93.07	0.319538	0.354455		93.07	0.241237	0.224407		68.53	0.0699434	0.0490814		68.53	0.536175	0.366212
93.159	0.357324	0.352234		93.159	0.214788	0.222784		68.596	0.0675478	0.0482727		68.596	0.507378	0.36854
93.249	0.387075	0.350391		93.249	0.175112	0.221352		68.662	0.0630632	0.0474939		68.662	0.465534	0.370582
93.338	0.460875	0.348484		93.338	0.140842	0.220009		68.728	0.057181	0.0468602		68.728	0.410152	0.372571
93.428	0.567687	0.346477		93.428	0.150101	0.218419		68.793	0.063089	0.0462943		68.793	0.38037	0.37433
93.517	0.574041	0.344264		93.517	0.148769	0.216471		68.859	0.0595779	0.0457774		68.859	0.357076	0.376603
93.607	0.601334	0.342125		93.607	0.145289	0.214111		68.925	0.0527416	0.0452976		68.925	0.317552	0.379317
93.696	0.541188	0.339868		93.696	0.153582	0.211626		68.991	0.049419	0.0449257		68.991	0.281429	0.382305
93.786	0.49754	0.33784		93.786	0.178217	0.209121		69.057	0.0483691	0.04456		69.057	0.26272	0.385342
93.875	0.540361	0.336284		93.875	0.196006	0.206816		69.123	0.0456072	0.0441606		69.123	0.248059	0.388227
93.965	0.544629	0.334696		93.965	0.213515	0.204666		69.189	0.0428264	0.0437617		69.189	0.275874	0.391132
94.054	0.47791	0.333121		94.054	0.220991	0.202459		69.255	0.0466401	0.0434035		69.255	0.284317	0.39449
94.144	0.400598	0.332011		94.144	0.24066	0.200293		69.321	0.0508018	0.0431983		69.321	0.314169	0.397994
94.233	0.361772	0.331397		94.233	0.211922	0.198171		69.387	0.056726	0.0430734		69.387	0.325909	0.401581
94.323	0.303349	0.330643		94.323	0.192786	0.195939		69.452	0.0564809	0.0430445		69.452	0.316643	0.405247
94.412	0.284631	0.329505		94.412	0.170919	0.193589		69.518	0.062523	0.0431926		69.518	0.32708	0.409071
94.502	0.238955	0.328305		94.502	0.141079	0.191473		69.584	0.0657029	0.0434671		69.584	0.361033	0.413175
94.591	0.269138	0.327065		94.591	0.113593	0.189649		69.65	0.0587445	0.0439322		69.65	0.41312	0.4176
94.681	0.239763	0.32592		94.681	0.0973848	0.188222		69.716	0.0570638	0.0445672		69.716	0.42672	0.422296
94.77	0.247457	0.324446		94.77	0.124816	0.186973		69.782	0.0553502	0.0453284		69.782	0.446961	0.427357
94.86	0.208554	0.322823		94.86	0.139926	0.185992		69.848	0.0528316	0.0461964		69.848	0.467363	0.432655
94.949	0.265586	0.321494		94.949	0.149115	0.185238		69.914	0.0527733	0.047111		69.914	0.444568	0.437815
95.039	0.286607	0.320354		95.039	0.149608	0.184917		69.98	0.0557886	0.0480147		69.98	0.45107	0.44276
95.128	0.330482	0.319111		95.128	0.114565	0.185306		70.045	0.0582142	0.0488676		70.045	0.431653	0.44765
95.218	0.350815	0.317998		95.218	0.111581	0.186246		70.111	0.0630664	0.0496837		70.111	0.432425	0.452109
95.307	0.332113	0.317032		95.307	0.103283	0.187549		70.177	0.0670355	0.050535		70.177	0.412392	0.456627
95.396	0.336852	0.31597		95.396	0.115909	0.188608		70.243	0.0784195	0.0514593		70.243	0.402331	0.461152
95.486	0.322629	0.314755		95.486	0.122933	0.189535		70.309	0.086766	0.0524048		70.309	0.394392	0.46556
95.575	0.284184	0.313431		95.575	0.140744	0.190111		70.375	0.0837018	0.0533609		70.375	0.381935	0.469874
95.665	0.273755	0.311993		95.665	0.157066	0.190355		70.441	0.0774008	0.0542194		70.441	0.395903	0.473934
95.754	0.25734	0.310911		95.754	0.173528	0.190149		70.507	0.0703801	0.0549702		70.507	0.395276	0.477959
95.844	0.295405	0.310324		95.844	0.222727	0.189803		70.573	0.0720723	0.0556969		70.573	0.410445	0.482199
95.933	0.283253	0.310109		95.933	0.242046	0.189043		70.638	0.0686533	0.0562939		70.638	0.424095	0.486645
96.023	0.235868	0.310031		96.023	0.262375	0.187985		70.704	0.0589981	0.0567474		70.704	0.414245	0.491075
96.112	0.210335	0.309621		96.112	0.261039	0.187009		70.77	0.0590985	0.0570993		70.77	0.390329	0.495772
96.202	0.220423	0.309447		96.202	0.283774	0.186153		70.836	0.0627661	0.0572989		70.836	0.394307	0.500421
96.291	0.224665	0.30961		96.291	0.309594	0.185667		70.902	0.0609289	0.057328		70.902	0.389525	0.505099
96.381	0.241852	0.309471		96.381	0.297826	0.185459		70.968	0.0658714	0.0573123		70.968	0.408746	0.509897
96.47	0.243242	0.308691		96.47	0.286792	0.185458		71.034	0.0718071	0.0571996		71.034	0.449746	0.514955
96.56	0.271994	0.307576		96.56	0.285157	0.185801		71.1	0.0817993	0.0570463		71.1	0.463694	0.520061
96.649	0.259296	0.305854		96.649	0.273924	0.185932		71.166	0.0879343	0.0569137		71.166	0.475795	0.524916
96.739	0.287841	0.304383		96.739	0.256574	0.186082		71.232	0.0795035	0.0567592		71.232	0.517196	0.529583
96.828	0.305338	0.302913		96.828	0.242725	0.186006		71.297	0.0718223	0.0565947		71.297	0.507237	0.534187
96.918	0.32184	0.301424		96.918	0.214132	0.18574		71.363	0.062782	0.0565898		71.363	0.535754	0.538548
97.007	0.341317	0.3001		97.007	0.19081	0.185179		71.429	0.0537826	0.0568035		71.429	0.525605	0.542697
97.097	0.380584	0.298995		97.097	0.158465	0.18447		71.495	0.0467025	0.0571782		71.495	0.519756	0.54665
97.186	0.350677	0.298373		97.186	0.147258	0.183695		71.561	0.0437091	0.0575652		71.561	0.484944	0.550544
97.276	0.382746	0.298233		97.276	0.131409	0.182869		71.627	0.0484745	0.0579446		71.627	0.481532	0.554489
97.365	0.374338	0.29856		97.365	0.126396	0.18222		71.693	0.0537856	0.0582512		71.693	0.473747	0.558246
97.455	0.318776	0.299282		97.455	0.0935878	0.18191		71.759	0.0493835	0.0584769		71.759	0.473052	0.561676
97.544	0.263673	0.300285		97.544	0.094912	0.181389		71.825	0.0512726	0.0585939		71.825	0.485019	0.564813
97.634	0.256847	0.301596		97.634	0.108154	0.180759		71.89	0.0578477	0.0586091		71.89	0.522588	0.567867
97.723	0.258113	0.30302		97.723	0.126268	0.179972		71.956	0.0570873	0.0585063		71.956	0.53495	0.570773
97.813	0.252586	0.304527		97.813	0.109069	0.1791		72.022	0.061331	0.0583981		72.022	0.519414	0.573917
97.902	0.278147	0.305962		97.902	0.129556	0.178224		72.088	0.0687388	0.058261		72.088	0.521828	0.577547
97.992	0.313311	0.307185		97.992	0.128251	0.177754		72.154	0.0754349	0.0581102		72.154	0.514642	0.581744
98.081	0.299606	0.308203		98.081	0.144854	0.177113		72.22	0.0822037	0.0580228		72.22	0.484881	0.586514
98.171	0.293044	0.309076		98.171	0.166486	0.176419		72.286	0.096145	0.0579457		72.286	0.462068	0.591456
98.26	0.259351	0.310273		98.26	0.198	0.175686		72.352	0.0910924	0.0579404		72.352	0.467405	0.596552
98.35	0.246267	0.31154		98.35	0.222718	0.174953		72.418	0.0806871	0.057917		72.418	0.503116	0.601667
98.439	0.242315	0.312684		98.439	0.225296	0.174254		72.484	0.0746655	0.057844		72.484	0.526659	0.606543
98.529	0.242514	0.313695		98.529	0.2295	0.173829		72.549	0.0760457	0.0577174		72.549	0.512401	0.611413
98.618	0.258716	0.31477		98.618	0.206375	0.173725		72.615	0.0786946	0.0575639		72.615	0.514602	0.616127
98.708	0.252549	0.315594		98.708	0.187814	0.173903		72.681	0.0846553	0.0573417		72.681	0.525901	0.620425
98.797	0.255687	0.316353		98.797	0.157672	0.174201		72.747	0.0855678	0.0571096		72.747	0.515826	0.624436
98.887	0.287104	0.317113		98.887	0.163006	0.174503		72.813	0.0898868	0.0568942		72.813	0.554118	0.628159
98.976	0.332177	0.3178		98.976	0.127592	0.175069		72.879	0.0879073	0.0566698		72.879	0.587793	0.631375
99.066	0.315561	0.31837		99.066	0.143091	0.175645		72.945	0.0809246	0.0563842		72.945	0.595287	0.634579
99.155	0.303507	0.319111		99.155	0.177475	0.176219		73.011	0.0700239	0.0560857		73.011	0.599971	0.638016
99.245	0.310319	0.319733		99.245	0.21188	0.176697		73.077	0.0674794	0.0557512		73.077	0.604524	0.641651
99.334	0.326225	0.320459		99.334	0.204066	0.177133		73.142	0.0652947	0.055356		73.142	0.634755	0.645246
99.424	0.315166	0.321211		99.424	0.192745	0.177286		73.208	0.0655526	0.0549606		73.208	0.638486	0.64857
99.513	0.322349	0.321592		99.513	0.200905	0.177862		73.274	0.0679993	0.0544708		73.274	0.660547	0.651923
99.603	0.282636	0.321733		99.603	0.194663	0.178719		73.34	0.0693058	0.0539504		73.34	0.66366	0.654932
99.692	0.257292	0.321672		99.692	0.185389	0.179846		73.406	0.0677548	0.0533249		73.406	0.665926	0.657626
99.782	0.245852	0.321541		99.782	0.134177	0.181005		73.472	0.0665518	0.0526531		73.472	0.668653	0.659948
99.871	0.256866	0.320989		99.871	0.15497	0.182162		73.538	0.0585086	0.0519647		73.538	0.688657	0.661949
99.961	0.285416	0.320365		99.961	0.176354	0.183483		73.604	0.0487102	0.0513107		73.604	0.683832	0.663817
100.05	0.29718	0.319583		100.05	0.156038	0.184799		73.67	0.046119	0.0506707		73.67	0.723697	0.665094
100.139	0.289544	0.318349		100.139	0.154428	0.186016		73.736	0.0408518	0.050068		73.736	0.743074	0.665975
100.229	0.276588	0.316753		100.229	0.152428	0.187055		73.801	0.0406528	0.0495378		73.801	0.797212	0.666477
100.318	0.305985	0.315406		100.318	0.200423	0.187723		73.867	0.0364263	0.0490927		73.867	0.815305	0.666861
100.408	0.317776	0.313816		100.408	0.212807	0.188227		73.933	0.036161	0.0486113		73.933	0.916779	0.666917
100.497	0.356999	0.312224		100.497	0.196209	0.18847		73.999	0.0295686	0.0480935		73.999	0.963801	0.666558
100.587	0.376614	0.31107						74.065	0.0264531	0.0475247		74.065	1	0.665679
100.676	0.4214	0.310804						74.131	0.0213383	0.0469044		74.131	0.95266	0.66455
100.766	0.425157	0.311148						74.197	0.0205896	0.046283		74.197	0.911397	0.663282
100.855	0.41657	0.312014						74.263	0.0191282	0.0457859		74.263	0.889459	0.661741
100.945	0.342382	0.312808						74.329	0.0226762	0.0454634		74.329	0.885906	0.660049
101.034	0.324398	0.313354						74.394	0.025913	0.0453046		74.394	0.905249	0.658392
101.124	0.33717	0.314441						74.46	0.0280843	0.0452377		74.46	0.889951	0.656713
101.213	0.32314	0.315667						74.526	0.0308922	0.0452751		74.526	0.88058	0.655241
101.303	0.309123	0.316469						74.592	0.0323919	0.0453063		74.592	0.900904	0.653833
101.392	0.313285	0.316667						74.658	0.0344659	0.0453444		74.658	0.914253	0.652542
101.482	0.327957	0.31675						74.724	0.0313744	0.0454637		74.724	0.918344	0.650987
101.571	0.356588	0.316473						74.79	0.0256018	0.0456592		74.79	0.915957	0.649283
101.661	0.377588	0.316057						74.856	0.0203359	0.0459082		74.856	0.90837	0.647498
101.75	0.365049	0.31517						74.922	0.0215098	0.046203		74.922	0.864363	0.645622
101.84	0.334906	0.314434						74.988	0.0234246	0.0464577		74.988	0.815714	0.643841
101.929	0.308276	0.313558						75.053	0.0247755	0.046672		75.053	0.748605	0.642162
102.019	0.305432	0.31282						75.119	0.0277016	0.0468832		75.119	0.710002	0.640602
102.108	0.291705	0.311869						75.185	0.0286418	0.0470875		75.185	0.707954	0.639226
102.198	0.30165	0.311447						75.251	0.0327349	0.0473505		75.251	0.683626	0.637664
102.287	0.370302	0.31106						75.317	0.0352224	0.0477313		75.317	0.657522	0.63601
102.377	0.360317	0.310814						75.383	0.0362433	0.0481604		75.383	0.685475	0.633969
102.466	0.346224	0.310592						75.449	0.0350218	0.0486299		75.449	0.653889	0.631867
102.556	0.344365	0.310415						75.515	0.0331951	0.0491192		75.515	0.629324	0.629615
102.645	0.370293	0.310289						75.581	0.0300419	0.0497261		75.581	0.618163	0.627496
102.735	0.393843	0.309877						75.646	0.0313498	0.0502835		75.646	0.62424	0.62543
102.824	0.430834	0.309296						75.712	0.033261	0.0508025		75.712	0.646936	0.623189
102.914	0.444497	0.308795						75.778	0.0350851	0.0511723		75.778	0.647034	0.621275
103.003	0.409471	0.30839						75.844	0.0310455	0.0514632		75.844	0.615424	0.619555
103.093	0.378898	0.308349						75.91	0.0347775	0.0517542		75.91	0.579822	0.618014
103.182	0.354214	0.308102						75.976	0.0434471	0.0521983		75.976	0.578845	0.616722
103.272	0.352586	0.307365						76.042	0.0574911	0.052891		76.042	0.541172	0.615085
103.361	0.337914	0.306553						76.108	0.0663761	0.0540842		76.108	0.54434	0.612992
103.451	0.345783	0.305813						76.174	0.0834254	0.0556919		76.174	0.535847	0.610655
103.54	0.375836	0.304787						76.239	0.0870621	0.0570844		76.239	0.52307	0.608269
103.63	0.407678	0.303189						76.305	0.0974198	0.0586684		76.305	0.49793	0.605981
103.719	0.417668	0.300936						76.371	0.11469	0.0606434		76.371	0.476939	0.603862
103.809	0.442627	0.298556						76.437	0.124981	0.0630898		76.437	0.487905	0.601605
103.898	0.403449	0.296021						76.503	0.137972	0.0660577		76.503	0.499657	0.599138
103.988	0.388388	0.293817						76.569	0.144073	0.0693898		76.569	0.489403	0.596716
104.077	0.389678	0.292046						76.635	0.130364	0.0729986		76.635	0.482705	0.594286
104.167	0.397756	0.291106						76.701	0.106577	0.0767742		76.701	0.475813	0.592044
104.256	0.38309	0.290244						76.767	0.0864523	0.0806181		76.767	0.469624	0.589596
104.346	0.378288	0.289754						76.833	0.0808169	0.0845432		76.833	0.451762	0.586997
104.435	0.341537	0.289413						76.898	0.0769852	0.0884714		76.898	0.432904	0.58422
104.524	0.274741	0.289431						76.964	0.0789972	0.0924201		76.964	0.436267	0.581626
104.614	0.252904	0.289237						77.03	0.0828312	0.0963605		77.03	0.440892	0.579284
104.703	0.236445	0.288603						77.096	0.0865509	0.100229		77.096	0.449785	0.57704
104.793	0.211322	0.287605						77.162	0.0928141	0.104074		77.162	0.433289	0.57492
104.882	0.182939	0.286853						77.228	0.100877	0.108062		77.228	0.447883	0.572923
104.972	0.188703	0.286331						77.294	0.100495	0.112101		77.294	0.430373	0.571069
105.061	0.175608	0.285935						77.36	0.102355	0.116215		77.36	0.392756	0.568958
105.151	0.191283	0.285927						77.426	0.107879	0.120451		77.426	0.349929	0.567005
105.24	0.191779	0.28613						77.491	0.103213	0.124805		77.491	0.330033	0.565041
105.33	0.181342	0.2863						77.557	0.10059	0.12927		77.557	0.327545	0.563105
105.419	0.15821	0.286285						77.623	0.0931507	0.133852		77.623	0.317881	0.561168
105.509	0.136787	0.286039						77.689	0.0877156	0.138411		77.689	0.313506	0.559295
105.598	0.138321	0.285693						77.755	0.0871246	0.142905		77.755	0.335108	0.557787
105.688	0.127129	0.285306						77.821	0.0853981	0.147352		77.821	0.332175	0.556595
105.777	0.110186	0.284906						77.887	0.0851235	0.151842		77.887	0.342553	0.555372
105.867	0.124365	0.284601						77.953	0.0896635	0.156367		77.953	0.371028	0.554194
105.956	0.122788	0.284245						78.019	0.0914786	0.160897		78.019	0.389453	0.553216
106.046	0.11115	0.283898						78.085	0.0937777	0.165374		78.085	0.398138	0.552172
106.135	0.136323	0.283754						78.15	0.0969913	0.169867		78.15	0.43497	0.551262
106.225	0.151347	0.283913						78.216	0.0982537	0.174276		78.216	0.429376	0.550417
106.314	0.139556	0.283969						78.282	0.0965619	0.178532		78.282	0.394228	0.549704
106.404	0.146019	0.283946						78.348	0.100695	0.182564		78.348	0.381351	0.548899
106.493	0.136393	0.28397						78.414	0.102837	0.186415		78.414	0.394304	0.548131
106.583	0.135787	0.284104						78.48	0.101873	0.190124		78.48	0.416154	0.547555
106.672	0.181186	0.28417						78.546	0.11813	0.193652		78.546	0.441935	0.546883
106.762	0.198194	0.284287						78.612	0.127628	0.197073		78.612	0.498711	0.546243
106.851	0.199001	0.284139						78.678	0.150335	0.200388		78.678	0.539734	0.545637
106.941	0.195835	0.283814						78.743	0.170808	0.203615		78.743	0.551728	0.544958
107.03	0.230856	0.283401						78.809	0.183067	0.20685		78.809	0.582415	0.544185
107.12	0.25609	0.283049						78.875	0.190771	0.210181		78.875	0.613697	0.54326
107.209	0.289739	0.282881						78.941	0.202246	0.21371		78.941	0.688177	0.54217
107.299	0.322794	0.282792						79.007	0.208454	0.217433		79.007	0.739436	0.541254
107.388	0.358625	0.282651						79.073	0.218243	0.221207		79.073	0.755845	0.540658
107.478	0.357597	0.282422						79.139	0.222418	0.224988		79.139	0.742989	0.540593
107.567	0.435962	0.28239						79.205	0.234384	0.228657		79.205	0.754903	0.540997
107.657	0.473664	0.282442						79.271	0.244693	0.23225		79.271	0.765731	0.542338
107.746	0.492771	0.282768						79.337	0.256157	0.235678		79.337	0.777976	0.543987
107.836	0.481245	0.283243						79.402	0.280334	0.238943		79.402	0.773923	0.546016
107.925	0.411565	0.284044						79.468	0.288321	0.242006		79.468	0.7587	0.547642
108.015	0.374705	0.284902						79.534	0.274073	0.244941		79.534	0.746105	0.549034
108.104	0.337102	0.285733						79.6	0.255104	0.247705		79.6	0.716809	0.550398
108.194	0.339795	0.286089						79.666	0.239438	0.250309		79.666	0.674739	0.552162
108.283	0.309666	0.286332						79.732	0.232445	0.25279		79.732	0.643899	0.554375
108.373	0.301294	0.286666						79.798	0.223234	0.25515		79.798	0.62081	0.556664
108.462	0.304895	0.286913						79.864	0.237346	0.257398		79.864	0.599997	0.5589
108.552	0.322395	0.287069						79.93	0.250586	0.259635		79.93	0.592823	0.561087
108.641	0.302473	0.287255						79.995	0.255008	0.261823		79.995	0.626518	0.563272
108.731	0.297375	0.287541						80.061	0.254217	0.263928		80.061	0.622573	0.565331
108.82	0.297317	0.288028						80.127	0.263445	0.265908		80.127	0.628689	0.56716
108.91	0.319576	0.288669						80.193	0.271486	0.267745		80.193	0.661452	0.568987
108.999	0.324432	0.289241						80.259	0.282581	0.269481		80.259	0.687694	0.570464
109.088	0.313599	0.289622						80.325	0.299455	0.271078		80.325	0.676053	0.571589
109.178	0.297216	0.289828						80.391	0.311197	0.272561		80.391	0.668981	0.572408
109.267	0.286095	0.290014						80.457	0.323142	0.273908		80.457	0.652927	0.573094
109.357	0.259019	0.290104						80.523	0.328056	0.275121		80.523	0.648966	0.573875
109.446	0.271586	0.290257						80.589	0.327386	0.276222		80.589	0.65995	0.574577
109.536	0.29284	0.290873						80.654	0.336888	0.277183		80.654	0.690322	0.575072
109.625	0.309925	0.291436						80.72	0.350598	0.277993		80.72	0.69232	0.575826
109.715	0.284799	0.291914						80.786	0.367345	0.278628		80.786	0.68675	0.576407
109.804	0.281389	0.292388						80.852	0.377637	0.27908		80.852	0.64757	0.576779
109.894	0.309588	0.293043						80.918	0.411223	0.279339		80.918	0.621094	0.577011
109.983	0.295606	0.29387						80.984	0.432919	0.279424		80.984	0.623915	0.577283
110.073	0.270556	0.294966						81.05	0.468993	0.27937		81.05	0.577363	0.577592
110.162	0.235475	0.296179						81.116	0.494813	0.279164		81.116	0.53485	0.577893
110.252	0.213847	0.297181						81.182	0.518493	0.278773		81.182	0.509341	0.577913
110.341	0.228163	0.297993						81.247	0.514563	0.278247		81.247	0.471563	0.577534
110.431	0.249102	0.298645						81.313	0.48941	0.277614		81.313	0.499327	0.577013
110.52	0.228521	0.299287						81.379	0.434601	0.276909		81.379	0.530192	0.576076
110.61	0.220611	0.299829						81.445	0.394563	0.276113		81.445	0.55799	0.574959
110.699	0.261629	0.30042						81.511	0.443605	0.275266		81.511	0.548664	0.573539
110.789	0.361692	0.301212						81.577	0.439238	0.274301		81.577	0.541139	0.572008
110.878	0.462847	0.302223						81.643	0.405295	0.27325		81.643	0.546512	0.570351
110.968	0.516091	0.30331						81.709	0.362006	0.272173		81.709	0.572393	0.568677
111.057	0.533896	0.304578						81.775	0.30551	0.271024		81.775	0.609425	0.56729
111.147	0.521238	0.305594						81.84	0.255651	0.269804		81.84	0.640019	0.566082
111.236	0.482386	0.306511						81.906	0.217222	0.268487		81.906	0.628316	0.564856
111.326	0.381194	0.307434						81.972	0.191943	0.266936		81.972	0.626129	0.5635
111.415	0.395128	0.308408						82.038	0.179886	0.265085		82.038	0.645503	0.561828
111.505	0.386022	0.309279						82.104	0.166481	0.262946		82.104	0.661474	0.559836
111.594	0.340396	0.310109						82.17	0.167934	0.260622		82.17	0.652338	0.557562
111.684	0.323966	0.310677						82.236	0.174129	0.258117		82.236	0.619107	0.555156
111.773	0.353625	0.310771						82.302	0.185186	0.255485		82.302	0.569841	0.552792
111.863	0.369675	0.310676						82.368	0.196042	0.252747		82.368	0.549826	0.550662
111.952	0.373306	0.310425						82.434	0.205544	0.249893		82.434	0.538177	0.548697
112.042	0.331749	0.309955						82.499	0.194602	0.246918		82.499	0.553828	0.54658
112.131	0.299535	0.309236						82.565	0.18949	0.243872		82.565	0.542368	0.544475
112.221	0.274863	0.308495						82.631	0.184942	0.240708		82.631	0.563432	0.542012
112.31	0.241203	0.307604						82.697	0.175972	0.237428		82.697	0.539969	0.539025
112.4	0.244273	0.306758						82.763	0.166503	0.234054		82.763	0.532002	0.535523
112.489	0.235175	0.305858						82.829	0.15722	0.230527		82.829	0.494366	0.531578
112.579	0.255929	0.304829						82.895	0.153984	0.226872		82.895	0.466028	0.527434
								82.961	0.151969	0.223054		82.961	0.45525	0.523076
								83.027	0.150271	0.219055		83.027	0.430136	0.518608
								83.092	0.149148	0.214902		83.092	0.400239	0.514194
								83.158	0.140999	0.210631		83.158	0.384206	0.509693
								83.224	0.134793	0.206253		83.224	0.372715	0.505109
								83.29	0.135638	0.201803		83.29	0.346658	0.500662
								83.356	0.14002	0.197252		83.356	0.3387	0.496256
								83.422	0.136676	0.19261		83.422	0.349683	0.491809
								83.488	0.14186	0.187894		83.488	0.368532	0.487575
								83.554	0.1518	0.183076		83.554	0.352084	0.483283
								83.62	0.168267	0.178142		83.62	0.366733	0.478474
								83.686	0.186317	0.173166		83.686	0.362306	0.473274
								83.751	0.19928	0.168198		83.751	0.361093	0.468155
								83.817	0.220363	0.163254		83.817	0.377359	0.463243
								83.883	0.233076	0.158415		83.883	0.394319	0.458439
								83.949	0.244492	0.15365		83.949	0.392713	0.453893
								84.015	0.250623	0.149033		84.015	0.406919	0.449624
								84.081	0.241987	0.144554		84.081	0.425479	0.445529
								84.147	0.212466	0.140136		84.147	0.47179	0.441763
								84.213	0.163274	0.135758		84.213	0.497313	0.438512
								84.279	0.119864	0.131441		84.279	0.518576	0.436094
								84.344	0.0931947	0.127153		84.344	0.498402	0.434273
								84.41	0.0767281	0.122915		84.41	0.482285	0.432718
								84.476	0.0731767	0.118686		84.476	0.440104	0.431059
								84.542	0.0676269	0.114543		84.542	0.411579	0.429514
								84.608	0.0681757	0.110525		84.608	0.42522	0.428035
								84.674	0.0715101	0.106672		84.674	0.418786	0.426557
								84.74	0.0782661	0.103039		84.74	0.445986	0.424965
								84.806	0.0777276	0.0994969		84.806	0.452565	0.423198
								84.872	0.0829443	0.0958674		84.872	0.446125	0.421421
								84.938	0.0914146	0.0921092		84.938	0.391815	0.419417
								85.003	0.0938605	0.0882407		85.003	0.351138	0.417047
								85.069	0.0949862	0.0842909		85.069	0.330486	0.414493
								85.135	0.0952902	0.0802481		85.135	0.333602	0.411832
								85.201	0.0784402	0.0762331		85.201	0.3663	0.409178
								85.267	0.0674561	0.0723027		85.267	0.386222	0.406443
								85.333	0.0552969	0.0684702		85.333	0.415901	0.403949
								85.399	0.0462748	0.0647418		85.399	0.455876	0.401433
								85.465	0.0395432	0.0612744		85.465	0.456625	0.398982
								85.531	0.0326303	0.0580288		85.531	0.471762	0.396803
								85.596	0.0315124	0.0549604		85.596	0.481197	0.394794
								85.662	0.025881	0.0521185		85.662	0.462518	0.392615
								85.728	0.0249559	0.0494659		85.728	0.443582	0.39035
								85.794	0.0217681	0.0470001		85.794	0.42529	0.387833
								85.86	0.0180066	0.0446651		85.86	0.409463	0.385013
								85.926	0.0167022	0.042428		85.926	0.409476	0.382004
								85.992	0.0156122	0.0403357		85.992	0.39356	0.378982
								86.058	0.0156068	0.0383663		86.058	0.381571	0.37591
								86.124	0.016304	0.0365677		86.124	0.380986	0.373069
								86.19	0.0168759	0.0349252		86.19	0.382158	0.370271
								86.255	0.0189784	0.0336174		86.255	0.373468	0.367499
								86.321	0.0166163	0.0325993		86.321	0.382206	0.364995
								86.387	0.0161639	0.0319776		86.387	0.375127	0.362304
								86.453	0.0146029	0.0316729		86.453	0.376479	0.359627
								86.519	0.0135264	0.0317203		86.519	0.390464	0.356847
								86.585	0.0131741	0.0318892		86.585	0.400127	0.353785
								86.651	0.0137993	0.0320487		86.651	0.413873	0.350859
								86.717	0.0124495	0.0319637		86.717	0.433216	0.348091
								86.783	0.013957	0.0316882		86.783	0.45981	0.345501
								86.848	0.0122204	0.0317657		86.848	0.453789	0.342907
								86.914	0.0131715	0.0318491		86.914	0.436318	0.340236
								86.98	0.0125363	0.0317657		86.98	0.405094	0.33754
								87.046	0.0121698	0.0314461		87.046	0.3588	0.334996
								87.112	0.0151905	0.0307363		87.112	0.328381	0.332667
								87.178	0.0155344	0.0295915		87.178	0.304638	0.330563
								87.244	0.0167163	0.0281566		87.244	0.300372	0.328395
								87.31	0.0172614	0.026669		87.31	0.32411	0.326192
								87.376	0.0188796	0.025279		87.376	0.349497	0.324135
								87.441	0.0194949	0.0240386		87.441	0.358128	0.322214
								87.507	0.0214063	0.0230002		87.507	0.342697	0.320297
								87.573	0.0210729	0.022168		87.573	0.322336	0.318196
								87.639	0.0202915	0.0215996		87.639	0.273701	0.315712
								87.705	0.0209764	0.0212236		87.705	0.238155	0.313064
								87.771	0.0257522	0.0209691		87.771	0.224364	0.310348
								87.837	0.0254138	0.0207282		87.837	0.216181	0.307712
								87.903	0.024265	0.0205144		87.903	0.231758	0.30506
								87.969	0.0252439	0.0202941		87.969	0.25205	0.302562
								88.035	0.0274133	0.0200452		88.035	0.265148	0.299963
								88.1	0.0285107	0.0197696		88.1	0.290377	0.29743
								88.166	0.0282539	0.019453		88.166	0.296926	0.294663
								88.232	0.0286089	0.0191761		88.232	0.298999	0.291622
								88.298	0.0340798	0.0189534		88.298	0.291135	0.288375
								88.364	0.0409987	0.0187381		88.364	0.285152	0.284771
								88.43	0.0420481	0.0184537		88.43	0.276571	0.280908
								88.496	0.0432022	0.0179493		88.496	0.281315	0.2769
								88.562	0.044637	0.0173888		88.562	0.272732	0.272771
								88.628	0.0486768	0.0169582		88.628	0.269407	0.268454
								88.693	0.0524382	0.0166621		88.693	0.269641	0.264121
								88.759	0.0553518	0.0163424		88.759	0.261574	0.259826
								88.825	0.0612875	0.0160087		88.825	0.252089	0.255578
								88.891	0.0672867	0.0156296		88.891	0.282507	0.251202
								88.957	0.0689693	0.0152896		88.957	0.317175	0.246882
								89.023	0.0616919	0.0149606		89.023	0.308111	0.242525
								89.089	0.0492986	0.014737		89.089	0.289913	0.238189
								89.155	0.0424502	0.0147427		89.155	0.291895	0.234049
								89.221	0.0343761	0.0149834		89.221	0.304599	0.230007
								89.287	0.0295156	0.0154796		89.287	0.301592	0.225889
								89.352	0.024821	0.0163206		89.352	0.286346	0.221875
								89.418	0.0247181	0.0174002		89.418	0.266939	0.218018
								89.484	0.0240449	0.0185893		89.484	0.220684	0.214495
								89.55	0.0250486	0.0197242		89.55	0.170482	0.211205
								89.616	0.0262579	0.0207629		89.616	0.133262	0.208114
								89.682	0.02884	0.0217318		89.682	0.111164	0.204958
								89.748	0.0328194	0.022762		89.748	0.114807	0.201844
								89.814	0.0338556	0.0239573		89.814	0.110459	0.198533
								89.88	0.0284963	0.0251992		89.88	0.11259	0.194994
								89.945	0.0185746	0.0265414		89.945	0.126548	0.191553
								90.011	0.0139729	0.0280436		90.011	0.142297	0.188092
								90.077	0.0135828	0.0296774		90.077	0.155784	0.184779
								90.143	0.0179134	0.0312192		90.143	0.146947	0.181566
								90.209	0.0237467	0.0327229		90.209	0.153105	0.178409
								90.275	0.0301173	0.0341019		90.275	0.166581	0.174957
								90.341	0.0411804	0.0351543		90.341	0.1627	0.171241
								90.407	0.0523852	0.0359653		90.407	0.153922	0.167488
								90.473	0.0699266	0.0366442		90.473	0.12932	0.16384
								90.539	0.0796632	0.0371771		90.539	0.130809	0.160474
								90.604	0.0795757	0.0377591		90.604	0.125297	0.157369
								90.67	0.0738564	0.0383189		90.67	0.122408	0.15453
								90.736	0.054762	0.0390308		90.736	0.116492	0.152002
								90.802	0.0405053	0.0399653		90.802	0.106748	0.149607
								90.868	0.0364463	0.0409488		90.868	0.106887	0.147402
								90.934	0.031474	0.0419329		90.934	0.120679	0.145446
								91	0.0276365	0.0430069		91	0.126557	0.143439
								91.066	0.025003	0.0442851		91.066	0.148774	0.141415
								91.132	0.0242576	0.0458125		91.132	0.191526	0.139418
								91.197	0.0231681	0.0476509		91.197	0.234305	0.137388
								91.263	0.025609	0.049684		91.263	0.272478	0.135422
								91.329	0.0364658	0.0517923		91.329	0.289924	0.133355
								91.395	0.0442528	0.0541519		91.395	0.257439	0.131299
								91.461	0.048679	0.0566252		91.461	0.217682	0.129277
								91.527	0.050687	0.059361		91.527	0.191025	0.127335
								91.593	0.048649	0.0625668		91.593	0.155788	0.125376
								91.659	0.0459485	0.0661328		91.659	0.137976	0.123601
								91.725	0.0459439	0.0698371		91.725	0.0912259	0.121856
								91.791	0.0391655	0.0736108		91.791	0.0769036	0.120217
								91.856	0.0394161	0.0773994		91.856	0.0760879	0.118744
								91.922	0.0372611	0.0812237		91.922	0.0780378	0.117441
								91.988	0.0390042	0.0852458		91.988	0.0811041	0.116314
								92.054	0.0456134	0.0894471		92.054	0.079743	0.115303
								92.12	0.0601249	0.0937548		92.12	0.0686075	0.114609
								92.186	0.0745235	0.0980253		92.186	0.0701549	0.113976
								92.252	0.0848095	0.102211		92.252	0.0769147	0.113331
								92.318	0.0949768	0.106618		92.318	0.0787921	0.112618
								92.384	0.113601	0.111263		92.384	0.0834541	0.11168
								92.449	0.144576	0.116055		92.449	0.0819579	0.110591
								92.515	0.164648	0.120953		92.515	0.0816187	0.10938
								92.581	0.161565	0.1259		92.581	0.0866088	0.108123
								92.647	0.148364	0.130871		92.647	0.0864917	0.107103
								92.713	0.125032	0.135844		92.713	0.0848322	0.106313
								92.779	0.107923	0.140772		92.779	0.07811	0.105635
								92.845	0.0946231	0.145695		92.845	0.074229	0.104863
								92.911	0.0773821	0.150574		92.911	0.0831141	0.103989
								92.977	0.0706472	0.155397		92.977	0.087251	0.102911
								93.042	0.0735334	0.160239		93.042	0.0849877	0.101677
								93.108	0.0721263	0.165189		93.108	0.0881237	0.100292
								93.174	0.0742339	0.170083		93.174	0.0784392	0.0987836
								93.24	0.0819053	0.17487		93.24	0.0759984	0.0973298
								93.306	0.0885087	0.179537		93.306	0.0671708	0.0959936
								93.372	0.0941989	0.184036		93.372	0.0477845	0.0947139
								93.438	0.102146	0.188422		93.438	0.042507	0.0937161
								93.504	0.104021	0.192597		93.504	0.0516195	0.0929485
								93.57	0.10493	0.196493		93.57	0.0677714	0.0923489
								93.636	0.113321	0.200115		93.636	0.0929157	0.0917471
								93.701	0.13431	0.203498		93.701	0.0982599	0.091204
								93.767	0.171906	0.206753		93.767	0.100155	0.0906533
								93.833	0.187709	0.210011		93.833	0.103051	0.0901942
								93.899	0.182886	0.213206		93.899	0.101038	0.0896749
								93.965	0.181007	0.216426		93.965	0.0909485	0.0891244
								94.031	0.19548	0.219653		94.031	0.0923735	0.088582
								94.097	0.217898	0.223008		94.097	0.101345	0.087982
								94.163	0.251213	0.226622		94.163	0.102103	0.0873718
								94.229	0.280195	0.230491		94.229	0.10677	0.0869872
								94.294	0.316982	0.234485		94.294	0.107323	0.0868323
								94.36	0.336277	0.238559		94.36	0.102809	0.0866123
								94.426	0.34642	0.242593		94.426	0.0896754	0.0861627
								94.492	0.348237	0.246654		94.492	0.0930754	0.0857047
								94.558	0.346179	0.250696		94.558	0.10498	0.0853212
								94.624	0.325272	0.254714		94.624	0.106684	0.0850141
								94.69	0.304607	0.258643		94.69	0.105792	0.0847097
								94.756	0.280726	0.262485		94.756	0.107778	0.0843836
								94.822	0.259233	0.266203		94.822	0.105804	0.0838466
								94.888	0.247335	0.269793		94.888	0.10596	0.0830259
								94.953	0.246507	0.273319		94.953	0.10424	0.0819386
								95.019	0.235065	0.27675		95.019	0.0899282	0.0806509
								95.085	0.219961	0.280089		95.085	0.0843129	0.0793927
								95.151	0.220052	0.283373		95.151	0.0959555	0.078112
								95.217	0.217909	0.286593		95.217	0.101362	0.0768527
								95.283	0.209291	0.289674		95.283	0.104938	0.0756968
								95.349	0.20816	0.292664		95.349	0.117989	0.0746609
								95.415	0.233679	0.295563		95.415	0.118874	0.0737344
								95.481	0.257671	0.298362		95.481	0.113661	0.0727697
								95.546	0.29925	0.301049		95.546	0.112066	0.0718672
								95.612	0.36723	0.303608		95.612	0.118332	0.0710788
								95.678	0.423442	0.306053		95.678	0.109748	0.0702902
								95.744	0.46431	0.308366		95.744	0.103304	0.0694678
								95.81	0.491127	0.310639		95.81	0.101208	0.0685027
								95.876	0.494675	0.312823		95.876	0.0902386	0.0675663
								95.942	0.507758	0.314833		95.942	0.089444	0.0666123
								96.008	0.49754	0.316618		96.008	0.093946	0.0656579
								96.074	0.478319	0.318079		96.074	0.0865661	0.0646827
								96.14	0.484509	0.319192		96.14	0.0856636	0.0636599
								96.205	0.504133	0.320008		96.205	0.0701809	0.0626552
								96.271	0.506161	0.320515		96.271	0.0715781	0.0617622
								96.337	0.495478	0.320813		96.337	0.0665994	0.0609312
								96.403	0.475129	0.32098		96.403	0.0551022	0.0602755
								96.469	0.443763	0.321057		96.469	0.0540124	0.0599401
								96.535	0.4313	0.321015		96.535	0.0542648	0.0599358
								96.601	0.436648	0.320812		96.601	0.0631725	0.0602412
								96.667	0.416158	0.320458		96.667	0.0591959	0.0607241
								96.733	0.416463	0.319923		96.733	0.0627019	0.0610486
								96.798	0.393698	0.319152		96.798	0.0615018	0.0611559
								96.864	0.339612	0.318207		96.864	0.065114	0.0611243
								96.93	0.295337	0.317063		96.93	0.0557356	0.0608881
								96.996	0.284741	0.315732		96.996	0.0540122	0.0605566
								97.062	0.282629	0.314184		97.062	0.0489759	0.0599289
								97.128	0.288726	0.312387		97.128	0.0478001	0.0592137
								97.194	0.292094	0.310329		97.194	0.0421292	0.0584996
								97.26	0.271328	0.307987		97.26	0.0399727	0.0578057
								97.326	0.250065	0.305438		97.326	0.0533818	0.0571406
								97.392	0.241476	0.302787		97.392	0.0446547	0.0564754
								97.457	0.250709	0.300101		97.457	0.0418921	0.0557439
								97.523	0.269678	0.2975		97.523	0.037868	0.0550301
								97.589	0.240513	0.294852		97.589	0.0271522	0.0543703
								97.655	0.207333	0.292294		97.655	0.0233424	0.0537334
								97.721	0.189759	0.289687		97.721	0.0226566	0.0531395
								97.787	0.174342	0.287247		97.787	0.023402	0.0525481
								97.853	0.167363	0.284863		97.853	0.0318158	0.0519673
								97.919	0.162821	0.282336		97.919	0.0264624	0.0514335
								97.985	0.161888	0.279571		97.985	0.0242715	0.0509137
								98.05	0.166254	0.276519		98.05	0.0237945	0.0503978
								98.116	0.165607	0.273158		98.116	0.0300806	0.0498512
								98.182	0.168105	0.269558		98.182	0.0321319	0.0492922
								98.248	0.171247	0.265659		98.248	0.019842	0.0488067
								98.314	0.164168	0.26164		98.314	0.0112732	0.0483652
								98.38	0.14651	0.25762		98.38	0.0232221	0.0479254
								98.446	0.147927	0.253541		98.446	0.0367796	0.047524
								98.512	0.155534	0.249426		98.512	0.0481096	0.0470747
								98.578	0.167085	0.24531		98.578	0.0559338	0.0466249
								98.643	0.187055	0.24118		98.643	0.0668521	0.046131
								98.709	0.197795	0.23701		98.709	0.0569593	0.0455196
								98.775	0.222315	0.232811		98.775	0.0362414	0.0448823
								98.841	0.258211	0.228517		98.841	0.0198598	0.0443163
								98.907	0.299792	0.22411		98.907	0.0186627	0.0438722
								98.973	0.338838	0.219695		98.973	0.00973534	0.0436156
								99.039	0.35644	0.215342		99.039	0.00765025	0.0434186
								99.105	0.354467	0.211165		99.105	0.00382907	0.0432592
								99.171	0.362827	0.207066		99.171	0.00938766	0.043145
								99.237	0.360391	0.202881		99.237	0.0158003	0.0430433
								99.302	0.360394	0.198609		99.302	0.0200221	0.0428988
								99.368	0.340834	0.194333		99.368	0.025874	0.0427874
								99.434	0.303334	0.19009		99.434	0.0228711	0.0427607
								99.5	0.26519	0.185949		99.5	0.024794	0.0427653
								99.566	0.240693	0.181847		99.566	0.0316483	0.0428277
								99.632	0.212411	0.177815		99.632	0.03974	0.0429212
								99.698	0.195318	0.173765		99.698	0.063365	0.0430114
								99.764	0.172032	0.16979		99.764	0.0742693	0.0430386
								99.83	0.152979	0.165856		99.83	0.0841027	0.0431116
								99.895	0.136392	0.162069		99.895	0.0781557	0.043289
								99.961	0.128689	0.158304		99.961	0.0703455	0.0435044
								100.027	0.124392	0.154525		100.027	0.061033	0.0437403
								100.093	0.124383	0.150568		100.093	0.0516171	0.0440159
								100.159	0.126429	0.146352		100.159	0.0471128	0.0443043
								100.225	0.118499	0.141926		100.225	0.0514591	0.0446193
								100.291	0.115775	0.137431		100.291	0.0602487	0.0449479
								100.357	0.113922	0.132834
								100.423	0.10303	0.128236
								100.489	0.085646	0.123774
								100.554	0.0741929	0.119405
								100.62	0.0593579	0.115025
								100.686	0.0479213	0.110601
								100.752	0.0417871	0.106231
								100.818	0.03873	0.102083
								100.884	0.0384116	0.0984093
								100.95	0.0407031	0.0954569
								101.016	0.0458959	0.0932508
								101.082	0.0439524	0.0916827
								101.147	0.0419003	0.0906435
								101.213	0.0422266	0.0898994
								101.279	0.0443851	0.0894332
								101.345	0.0475175	0.0890175
								101.411	0.0584377	0.0885487
								101.477	0.0716589	0.0882832
								101.543	0.0862292	0.0883475
								101.609	0.087096	0.0886297
								101.675	0.0769212	0.0890306
								101.741	0.0621801	0.0894903
								101.806	0.0506979	0.0898889
								101.872	0.0490812	0.0903129
								101.938	0.0545319	0.0908274
								102.004	0.0622443	0.0912902
								102.07	0.0754246	0.0918278
								102.136	0.0774461	0.0922558
								102.202	0.079297	0.0924075
								102.268	0.0788297	0.0923152
								102.334	0.0857342	0.0921995
								102.399	0.091226	0.092145
								102.465	0.106043	0.0922146
								102.531	0.122511	0.0923847
								102.597	0.132349	0.0923819
								102.663	0.131899	0.0921894
								102.729	0.130225	0.0918896
								102.795	0.110871	0.0915688
								102.861	0.10762	0.0912562
								102.927	0.0838657	0.0906058
								102.993	0.0899929	0.0896417
								103.058	0.0772245	0.0886114
								103.124	0.0708445	0.0875574
								103.19	0.0718123	0.0865739
								103.256	0.0768848	0.0856308
								103.322	0.0789154	0.0848577
								103.388	0.0904184	0.084321
								103.454	0.0953011	0.0840623
								103.52	0.105299	0.0840611
								103.586	0.0992892	0.084244
								103.651	0.0849059	0.0844761
								103.717	0.0752707	0.0846126
								103.783	0.0656753	0.0847657
								103.849	0.0568565	0.0849943
								103.915	0.0492619	0.0852997
								103.981	0.0455464	0.0857399
								104.047	0.0427591	0.0862308
								104.113	0.0446477	0.0869582
								104.179	0.0489413	0.0879727
								104.244	0.0457471	0.0893425
								104.31	0.0457081	0.0910573
								104.376	0.0469122	0.0929851
								104.442	0.0424517	0.0949642
								104.508	0.0426139	0.097054
								104.574	0.0462339	0.099183
								104.64	0.0549232	0.101349
								104.706	0.0673741	0.103434
								104.772	0.082828	0.105302
								104.838	0.105391	0.106882
								104.903	0.134154	0.108304
								104.969	0.160962	0.109513
								105.035	0.16647	0.110578
								105.101	0.169522	0.111438
								105.167	0.152912	0.11214
								105.233	0.135845	0.112705
								105.299	0.12329	0.113175
								105.365	0.13178	0.113565
								105.431	0.154937	0.113919
								105.496	0.18146	0.114222
								105.562	0.198773	0.114447
								105.628	0.211612	0.114629
								105.694	0.20592	0.11479
								105.76	0.194724	0.114821
								105.826	0.188419	0.114658
								105.892	0.191444	0.1144
								105.958	0.207744	0.114034
								106.024	0.238083	0.113573
								106.09	0.243816	0.113069
								106.155	0.231206	0.112522
								106.221	0.209775	0.111909
								106.287	0.174484	0.111242
								106.353	0.140855	0.110555
								106.419	0.109692	0.109802
								106.485	0.0899176	0.108968
								106.551	0.0819354	0.108067
								106.617	0.0846174	0.107126
								106.683	0.0933304	0.106124
								106.748	0.0886638	0.105138
								106.814	0.078492	0.10419
								106.88	0.0672464	0.103307
								106.946	0.0573849	0.102388
								107.012	0.0455365	0.101389
								107.078	0.0390758	0.100266
								107.144	0.0372792	0.0990121
								107.21	0.043159	0.0976918
								107.276	0.0441335	0.0963859
								107.342	0.0463065	0.0950521
								107.407	0.0525603	0.0937523
								107.473	0.0509419	0.0924263
								107.539	0.0522423	0.0910929
								107.605	0.0530267	0.0896949
								107.671	0.0492259	0.0882787
								107.737	0.0439886	0.0868596
								107.803	0.0394343	0.0854849
								107.869	0.0514783	0.0841833
								107.935	0.0651651	0.0829201
								108	0.0790597	0.0816738
								108.066	0.0984544	0.080428
								108.132	0.124572	0.0791054
								108.198	0.155409	0.0777971
								108.264	0.178533	0.0763414
								108.33	0.179815	0.0749452
								108.396	0.176399	0.0734234
								108.462	0.166844	0.0717943
								108.528	0.163978	0.0701398
								108.593	0.144986	0.0684876
								108.659	0.120712	0.0667963
								108.725	0.084215	0.0651634
								108.791	0.0527614	0.0635051
								108.857	0.0320968	0.0618565
								108.923	0.0207355	0.0601648
								108.989	0.0198188	0.0584872
								109.055	0.0207749	0.0567944
								109.121	0.019226	0.0550179
								109.187	0.0217799	0.0531495
								109.252	0.0246927	0.051138
								109.318	0.0316999	0.0489333
								109.384	0.0251875	0.0465978
								109.45	0.0233036	0.0441361
								109.516	0.0179888	0.041595
								109.582	0.0126934	0.0389224
								109.648	0.00627962	0.0361835
								109.714	0.00427087	0.0334493
								109.78	0.00331823	0.0308023
								109.845	0.00193431	0.0283167
								109.911	0.00276827	0.026081
								109.977	0.000897881	0.0240509
								110.043	0	0.0221899
								110.109	0.00735465	0.0205299
								110.175	0.00745805	0.0190858
								110.241	0.0108284	0.0179608
								110.307	0.0138855	0.0172127
								110.373	0.0193787	0.0166078
								110.439	0.0210864	0.0160619
								110.504	0.0212657	0.0154108
								110.57	0.0235476	0.0146704
								110.636	0.0267383	0.0138297
								110.702	0.027551	0.0130693
								110.768	0.0327501	0.0124179
								110.834	0.0318391	0.0118057
								110.9	0.0306263	0.011222
								110.966	0.0267374	0.010708
								111.032	0.0298576	0.0101142
								111.097	0.0356981	0.00943559
								111.163	0.0322812	0.00881566
								111.229	0.0263768	0.00838881
								111.295	0.0216665	0.00834926
								111.361	0.0136844	0.00873695
								111.427	0.00860878	0.00926766
								111.493	0.0094646	0.00964782
								111.559	0.0115443	0.00979628
								111.625	0.0114913	0.00993636
								111.691	0.0113659	0.0102085
								111.756	0.0135155	0.010284
								111.822	0.0159022	0.0107809
								111.888	0.0166768	0.0117955
								111.954	0.0216606	0.013058
								112.02	0.0233039	0.0143277
								112.086	0.0248186	0.0152937
								112.152	0.0240776	0.0159588
								112.218	0.0253109	0.0165686
								112.284	0.0218354	0.0171992
								112.349	0.0202049	0.0180737
								112.415	0.0223084	0.0192651
								112.481	0.024644	0.020998
								112.547	0.0221996	0.0232821
								112.613	0.0288277	0.0261752
								112.679	0.0323796	0.0296122
								112.745	0.0343851	0.0335029
								112.811	0.0336461	0.0376203
								112.877	0.0394521	0.0419935
								112.943	0.0461821	0.0467379
								113.008	0.0498159	0.051783
								113.074	0.0564242	0.0571755
								113.14	0.0613246	0.0627303
								113.206	0.0655914	0.0685117
								113.272	0.0631492	0.0745342
								113.338	0.0619392	0.0807519
								113.404	0.0542113	0.0871383
								113.47	0.0483613	0.0936892
								113.536	0.0457441	0.100526
								113.601	0.0416543	0.107697
								113.667	0.0464783	0.115098
								113.733	0.0550104	0.122626
								113.799	0.0589353	0.130147
								113.865	0.0632526	0.137713
								113.931	0.0713412	0.145148
								113.997	0.0749202	0.1523
								114.063	0.0852177	0.159126
								114.129	0.0962568	0.165736
								114.195	0.0997658	0.172276
								114.26	0.0859238	0.178754
								114.326	0.0806608	0.185157
								114.392	0.0855351	0.191591
								114.458	0.0925691	0.198103
								114.524	0.108896	0.204843
								114.59	0.137527	0.211575
								114.656	0.158907	0.218295
								114.722	0.185545	0.22476
								114.788	0.209015	0.230923
								114.853	0.234204	0.236861
								114.919	0.254044	0.242439
								114.985	0.265563	0.247664
								115.051	0.259608	0.252741
								115.117	0.247171	0.257751
								115.183	0.224845	0.262701
								115.249	0.214221	0.267448
								115.315	0.213407	0.271843
								115.381	0.211631	0.275832
								115.446	0.21576	0.279522
								115.512	0.211819	0.282827
								115.578	0.198156	0.286054
								115.644	0.198723	0.2892
								115.71	0.209946	0.292318
								115.776	0.226525	0.295439
								115.842	0.240282	0.298777
								115.908	0.260459	0.30239
								115.974	0.275319	0.306193
								116.04	0.302093	0.310047
								116.105	0.345121	0.314074
								116.171	0.383034	0.318253
								116.237	0.412312	0.32253
								116.303	0.446956	0.326873
								116.369	0.477993	0.331319
								116.435	0.493139	0.335786
								116.501	0.497978	0.340268
								116.567	0.487377	0.344639
								116.633	0.485574	0.348898
								116.698	0.50281	0.35309
								116.764	0.546791	0.357407
								116.83	0.595267	0.361801
								116.896	0.596329	0.366319
								116.962	0.576471	0.370828
								117.028	0.607519	0.375273
								117.094	0.556012	0.379688
								117.16	0.499416	0.384093
								117.226	0.492645	0.388598
								117.292	0.528744	0.393177
								117.357	0.600201	0.397673
								117.423	0.668093	0.402072
								117.489	0.699609	0.406223
								117.555	0.721894	0.410106
								117.621	0.70863	0.413784
								117.687	0.688983	0.417394
								117.753	0.638936	0.42087
								117.819	0.593338	0.424451
								117.885	0.532173	0.428252
								117.95	0.479645	0.432144
								118.016	0.442832	0.435879
								118.082	0.430979	0.439174
								118.148	0.416624	0.441908
								118.214	0.38309	0.444283
								118.28	0.353699	0.446437
								118.346	0.313734	0.4486
								118.412	0.300365	0.451013
								118.478	0.292958	0.453483
								118.544	0.284446	0.455782
								118.609	0.282544	0.457912
								118.675	0.290044	0.459875
								118.741	0.305301	0.461749
								118.807	0.3076	0.463548
								118.873	0.294797	0.465257
								118.939	0.274622	0.466946
								119.005	0.263649	0.468597
								119.071	0.26514	0.47019
								119.137	0.264177	0.471628
								119.202	0.272366	0.4729
								119.268	0.296678	0.473966
								119.334	0.31413	0.474722
								119.4	0.318303	0.47521
								119.466	0.309479	0.475701
								119.532	0.307483	0.476193
								119.598	0.316729	0.476573
								119.664	0.311465	0.477016
								119.73	0.295534	0.477554
								119.796	0.259354	0.477996
								119.861	0.257678	0.478496
								119.927	0.260154	0.479313
								119.993	0.285321	0.480357
								120.059	0.322267	0.481522
								120.125	0.344889	0.48262
								120.191	0.387951	0.483505
								120.257	0.429842	0.484257
								120.323	0.445647	0.484871
								120.389	0.450557	0.485204
								120.454	0.453608	0.485411
								120.52	0.480457	0.485495
								120.586	0.527929	0.48535
								120.652	0.586182	0.485071
								120.718	0.638874	0.484554
								120.784	0.699002	0.484042
								120.85	0.718143	0.483479
								120.916	0.73798	0.482887
								120.982	0.753287	0.482299
								121.047	0.76072	0.481708
								121.113	0.734088	0.480869
								121.179	0.699573	0.479692
								121.245	0.677714	0.478419
								121.311	0.673872	0.477173
								121.377	0.655092	0.476329
								121.443	0.632946	0.476038
								121.509	0.61709	0.476178
								121.575	0.60265	0.47677
								121.641	0.588309	0.477901
								121.706	0.588933	0.479679
								121.772	0.580352	0.481796
								121.838	0.587681	0.484333
								121.904	0.596025	0.487133
								121.97	0.593854	0.490322
								122.036	0.564388	0.494008
								122.102	0.546715	0.498301
								122.168	0.522077	0.503134
								122.234	0.514259	0.508298
								122.299	0.513736	0.513579
								122.365	0.510132	0.519187
								122.431	0.503105	0.524513
								122.497	0.476661	0.529416
								122.563	0.457298	0.534146
								122.629	0.457319	0.538898
								122.695	0.458827	0.543988
								122.761	0.480578	0.549365
								122.827	0.508005	0.554895
								122.893	0.521339	0.560652
								122.958	0.515756	0.566498
								123.024	0.523446	0.572326
								123.09	0.494927	0.577852
								123.156	0.442371	0.583088
								123.222	0.416503	0.587992
								123.288	0.424148	0.592545
								123.354	0.47339	0.596593
								123.42	0.540013	0.60025
								123.486	0.58485	0.603503
								123.551	0.611091	0.606331
								123.617	0.600166	0.608673
								123.683	0.555281	0.61058
								123.749	0.536368	0.612484
								123.815	0.550791	0.614486
								123.881	0.558742	0.616598
								123.947	0.567598	0.618789
								124.013	0.557768	0.621035
								124.079	0.547288	0.623358
								124.145	0.541511	0.625554
								124.21	0.523261	0.627493
								124.276	0.516024	0.6292
								124.342	0.515322	0.630695
								124.408	0.525259	0.632104
								124.474	0.537436	0.633417
								124.54	0.56042	0.634607
								124.606	0.595753	0.635697
								124.672	0.633431	0.636674
								124.738	0.632193	0.637455
								124.803	0.624161	0.637983
								124.869	0.615029	0.638366
								124.935	0.587823	0.638765
								125.001	0.564729	0.639007
								125.067	0.572851	0.638969
								125.133	0.567546	0.638569
								125.199	0.535992	0.637989
								125.265	0.510563	0.637182
								125.331	0.506877	0.636331
								125.396	0.529329	0.635505
								125.462	0.577524	0.634603
								125.528	0.610763	0.633729
								125.594	0.638341	0.63289
								125.66	0.671295	0.631899
								125.726	0.674664	0.630697
								125.792	0.667337	0.629436
								125.858	0.687472	0.628232
								125.924	0.703884	0.627133
								125.99	0.73606	0.626275
								126.055	0.738664	0.625596
								126.121	0.742302	0.625166
								126.187	0.732607	0.624737
								126.253	0.732142	0.624287
								126.319	0.744511	0.62382
								126.385	0.80081	0.623248
								126.451	0.871532	0.622371
								126.517	0.915486	0.621108
								126.583	0.938282	0.61959
								126.648	0.91804	0.617938
								126.714	0.892142	0.616076
								126.78	0.880911	0.613923
								126.846	0.858757	0.611488
								126.912	0.829157	0.608822
								126.978	0.77945	0.605903
								127.044	0.759782	0.602807
								127.11	0.716668	0.599497
								127.176	0.679621	0.595994
								127.242	0.630334	0.592323
								127.307	0.581915	0.588417
								127.373	0.542782	0.58405
								127.439	0.518031	0.579342
								127.505	0.476129	0.574251
								127.571	0.442698	0.568895
								127.637	0.42738	0.563418
								127.703	0.418839	0.557827
								127.769	0.423517	0.552075
								127.835	0.43904	0.546083
								127.9	0.468575	0.539851
								127.966	0.488527	0.533453
								128.032	0.514995	0.526907
								128.098	0.5271	0.520346
								128.164	0.518763	0.513838
								128.23	0.494607	0.507251
								128.296	0.477355	0.500465
								128.362	0.469517	0.493606
								128.428	0.461714	0.486453
								128.494	0.44085	0.478809
								128.559	0.428148	0.470924
								128.625	0.4519	0.462982
								128.691	0.483008	0.45531
								128.757	0.513854	0.447996
								128.823	0.528005	0.440952
								128.889	0.554858	0.434027
								128.955	0.562303	0.427021
								129.021	0.530194	0.419802
								129.087	0.486728	0.412441
								129.152	0.438102	0.40518
								129.218	0.398799	0.397971
								129.284	0.370925	0.390825
								129.35	0.346784	0.383583
								129.416	0.339495	0.37624
								129.482	0.336207	0.368805
								129.548	0.320317	0.361172
								129.614	0.309351	0.353385
								129.68	0.29108	0.345499
								129.746	0.270925	0.337624
								129.811	0.263547	0.329848
								129.877	0.268973	0.322292
								129.943	0.270545	0.314987
								130.009	0.271662	0.307991
								130.075	0.267797	0.300991
								130.141	0.254125	0.293971
								130.207	0.226943	0.286915
								130.273	0.210587	0.279653
								130.339	0.200731	0.272218
								130.404	0.18182	0.264783
								130.47	0.16871	0.257214
								130.536	0.166846	0.249225
								130.602	0.160572	0.240927
								130.668	0.157118	0.232586
								130.734	0.155298	0.22442
								130.8	0.160257	0.21655
								130.866	0.164577	0.20886
								130.932	0.172575	0.201462
								130.997	0.179046	0.194523

## Sheet: Fig2F
Proportion of cortactin-rich leading edge (%)	Control	VAPA KO	VAPA KO+Ch-VAPA	VAPA KO+Ch-VAPA KD/MD
	29.5754	55.3132	86.6714	86.93
	37.3726	56.0168	35.2599	77.8992
	45.02	57.7257	50.2283	31.2904
	12.6728	88.9914	43.0346	71.6316
	36.6646	64.8201	92.0087	61.1243
	25.5203	41.5771	37.0538	72.9708
	33.2838	64.8201	52.0391	56.2818
	29.669	72.3384	21.3799	70.0943
	49.3366	42.4629	35.2444	83.8003
	56.486	76.1873	29.0611	54.8736
	46.1099	82.7048	62.7082	67.2087
	49.9855	77.3207	25.398	52.7939
	37.8665	67.3967	61.9712	79.5824
	47.0991	72.4781	43.2067	73.8382
	23.2357	92.4075	66.2777	72.623
	35.5189	65.0083	61.2162	36.5863
	28.633	63.6853	35.9051	66.8105
	46.5071	46.2132	60.876	33.8436
	36.1996	57.0167	29.7187	56.2389
	39.8777	48.5747	71.0403	83.4377
	44.4098	66.7572	33.8891	53.5944
	39.7377	100	84.1323	44.3055
	59.2043	100	27.9479	68.8853
	42.9822	63.1048	31.9336	62.0637
	32.322	76.0577	71.9023	69.3177
	39.5476	84.9917	44.0346	85.3355
	50.0545	93.1525	38.1355	65.8082
	47.1751	77.675	73.678	80.8399
	35.3636		50.6048	67.9489
	66.6536

## Sheet: Fig2G
Median length of cortactin-rich domains normalized to length of the leading edge	Control	VAPA KO	VAPA KO+Ch-VAPA	VAPA KO+Ch-VAPA KD/MD
	0.100506	0.146964	0.866714	0.8693
	0.100973	0.560168	0.352599	0.778992
	0.151734	0.126882	0.145227	0.156452
	0.126728	0.437771	0.100133	0.358158
	0.132097	0.889914	0.460043	0.180945
	0.0916488	0.324101	0.0911017	0.305621
	0.111822	0.207886	0.260196	0.729708
	0.148345	0.361692	0.0502499	0.281409
	0.114802	0.69364	0.176222	0.700943
	0.28243	0.212314	0.290611	0.838003
	0.0608983	0.380937	0.171519	0.548736
	0.106233	0.827048	0.12699	0.672087
	0.107612	0.386603	0.619711	0.0830793
	0.235495	0.336983	0.216033	0.795824
	0.0862506	0.724781	0.331389	0.738382
	0.109936	0.924075	0.306081	0.72623
	0.078413	0.650083	0.179525	0.182931
	0.067683	0.636853	0.60876	0.186279
	0.0905422	0.117932	0.148593	0.169218
	0.129101	0.285084	0.270011	0.562389
	0.118373	0.0888263	0.0612911	0.834377
	0.130466	0.667572	0.841323	0.535944
	0.296022	1	0.0851394	0.443055
	0.214911	1	0.159668	0.344426
	0.077023	0.164508	0.719023	0.177809
	0.0395652	0.380288	0.0726193	0.346588
	0.1692	0.849917	0.0849306	0.853355
	0.12953	0.465763	0.171773	0.658082
	0.0800872	0.107089	0.253024	0.808399
	0.123696	0.77675		0.339744

## Sheet: Fig2H
Number of protrusions in 30 min	Control	VAPA KO	VAPA KO+Ch-VAPA	VAPA KO+Ch-VAPA KD/MD
	2.33333	1.33333	1.33333	1
	3	1	1	1.33333
	3	1	1.66667	1
	1	1	2.33333	1
	1.66667	1	1	1.66667
	3.66667	1	1	1
	2	2	1.66667	1
	1.66667	1.5	1	1
	1	2	1.66667	1.33333
	1.33333	1	1.5	1.33333
	2.33333	1	1	1
	2	1	2.33333	1
	2	1	1.66667
	1	1.5	1
	1.5	1	2.33333
	2	1	2
		1	2
		1
		1
		1.5
		1.5
