# Supplementary material for: The ER tether VAPA is required for proper cell motility and anchors ER-PM contact sites to focal adhesions
Source: eLife journal article supplement (doi:10.7554/elife.85962), 2024-02-08
Supplement: fig3-data1 [file elife-85962-fig3-data1-v1.zip]

## Sheet: Fig3C
GFP-PH-OSBP Golgi/Cytosol ratio	Control	VAPA KO				GFP-PH-OSBP Endosomes/Cytosol ratio	Control	VAPA KO
	5.57384	3.91405					1.5891	1.52888
	4.19082	5.90957					1.44469	1.30674
	4.23393	5.44336					1.68653	1.08042
	6.18567	3.49216					0.806369	1.13227
	5.60173	3.35964					1.69707	1.50561
	4.48306	5.98533					1.40961	3.16184
	7.01709	6.41541					1.91651	6.48987
	6.48846	12.4171					1.79311	1.99628
	4.91339	8.19196					2.32976	1.20152
	3.97228	4.36905					2.02041	2.08116
	3.51742	4.62261					1.46801	3.17191
	6.77154	4.6988					2.06618	1.54584
	4.59795	4.21895					1.67177	1.73633
	8.46476	4.3805
	8.99101	5.56301
	4.40714	6.8772
	5.87661	5.02381
	11.2419	8.37733
	7.13552	11.657
	4.34347	8.9748
	3.95754	7.67393
	4.77343	10.2645
	7.54144	10.1155
	5.21729	7.11702
		4.549

## Sheet: Fig3D
Control				VAPA KO
Distance to origin (mm)	Normalized Ch-P4M SidM grey levels	Smoothed		Distance to origin (mm)	Normalized Ch-P4M SidM grey levels	Smoothed
0	0.201517	0.182378		0	0.237583	0.288751
0.0658	0.184887	0.178103		0.0658	0.398324	0.305678
0.1315	0.160966	0.174345		0.1315	0.395765	0.30813
0.1973	0.137025	0.170537		0.1973	0.246535	0.29625
0.2631	0.171917	0.17124		0.2631	0.265556	0.269441
0.3288	0.157478	0.169781		0.3288	0.290472	0.267605
0.3946	0.218592	0.17388		0.3946	0.261006	0.258703
0.4604	0.177414	0.180274		0.4604	0.163845	0.258487
0.5261	0.179	0.18808		0.5261	0.199705	0.269278
0.5919	0.193918	0.193764		0.5919	0.282992	0.285051
0.6577	0.168564	0.185132		0.6577	0.464191	0.295004
0.7234	0.205976	0.181312		0.7234	0.299601	0.309759
0.7892	0.186441	0.179421		0.7892	0.345756	0.312008
0.8549	0.188971	0.186622		0.8549	0.221985	0.316437
0.9207	0.171973	0.192063		0.9207	0.275326	0.297266
0.9865	0.147604	0.196698		0.9865	0.326074	0.275053
1.0522	0.227093	0.200554		1.0522	0.266837	0.251855
1.118	0.235547	0.202438		1.118	0.186575	0.253511
1.1838	0.213497	0.204812		1.1838	0.286145	0.23219
1.2495	0.20987	0.209062		1.2495	0.22405	0.233565
1.3153	0.19366	0.210025		1.3153	0.247914	0.220578
1.3811	0.18757	0.201674		1.3811	0.192845	0.216931
1.4468	0.203343	0.187639		1.4468	0.193061	0.220708
1.5126	0.181307	0.184673		1.5126	0.186016	0.235114
1.5784	0.205898	0.182939		1.5784	0.302734	0.226523
1.6441	0.161511	0.18106		1.6441	0.228365	0.230823
1.7099	0.161367	0.18862		1.7099	0.252995	0.231239
1.7757	0.204804	0.195542		1.7757	0.233129	0.250886
1.8414	0.210253	0.202435		1.8414	0.279755	0.258308
1.9072	0.19076	0.205998		1.9072	0.168219	0.265809
1.973	0.22168	0.207093		1.973	0.26408	0.249545
2.0387	0.252988	0.209951		2.0387	0.29009	0.248864
2.1045	0.203654	0.213427		2.1045	0.329168	0.245884
2.1703	0.19644	0.210341		2.1703	0.20895	0.233749
2.236	0.175163	0.212308		2.236	0.218678	0.222958
2.3018	0.214438	0.217149		2.3018	0.130795	0.22185
2.3676	0.223047	0.217829		2.3676	0.244743	0.198974
2.4333	0.254928	0.216969		2.4333	0.232856	0.2144
2.4991	0.209002	0.223857		2.4991	0.17313	0.228066
2.5648	0.237608	0.229148		2.5648	0.27009	0.260875
2.6306	0.230072	0.231287		2.6306	0.274062	0.275706
2.6964	0.20581	0.222486		2.6964	0.28849	0.302957
2.7621	0.197154	0.209303		2.7621	0.437243	0.316195
2.8279	0.229995	0.196878		2.8279	0.252683	0.330102
2.8937	0.216762	0.195175		2.8937	0.333761	0.325136
2.9594	0.177048	0.185759		2.9594	0.290232	0.31666
3.0252	0.14903	0.184285		3.0252	0.38355	0.32278
3.091	0.158548	0.188105		3.091	0.301655	0.320448
3.1567	0.204064	0.191078		3.1567	0.250064	0.304113
3.2225	0.217929	0.188685		3.2225	0.261439	0.314133
3.2883	0.180541	0.187485		3.2883	0.397379	0.291171
3.354	0.220052	0.192202		3.354	0.34593	0.283356
3.4198	0.209086	0.196156		3.4198	0.238161	0.269669
3.4856	0.179709	0.196454		3.4856	0.220135	0.279649
3.5513	0.15922	0.203069		3.5513	0.290308	0.309932
3.6171	0.187109	0.209965		3.6171	0.22855	0.308289
3.6829	0.244803	0.223404		3.6829	0.351694	0.297609
3.7486	0.244887	0.228266		3.7486	0.338149	0.311198
3.8144	0.25338	0.236534		3.8144	0.404991	0.318876
3.8802	0.274212	0.239939		3.8802	0.393101	0.304933
3.9459	0.21605	0.24157		3.9459	0.137152	0.287876
4.0117	0.246946	0.238734		4.0117	0.256936	0.282888
4.0774	0.20989	0.238508		4.0774	0.295891	0.263008
4.1432	0.23163	0.247579		4.1432	0.22685	0.258202
4.209	0.237582	0.26295		4.209	0.251377	0.252748
4.2747	0.29143	0.274038		4.2747	0.34262	0.275996
4.3405	0.300677	0.286046		4.3405	0.350567	0.342025
4.4063	0.318542	0.291186		4.4063	0.31792	0.395055
4.472	0.317875	0.297449		4.472	0.387271	0.459617
4.5378	0.303715	0.29121		4.5378	0.450591	0.518907
4.6036	0.24355	0.284299		4.6036	0.62245	0.552397
4.6693	0.268543	0.272372		4.6693	0.723555	0.549204
4.7351	0.289652	0.276481		4.7351	0.610418	0.52991
4.8009	0.286413	0.28783		4.8009	0.502663	0.503702
4.8666	0.288224	0.314818		4.8666	0.399487	0.473781
4.9324	0.350071	0.356034		4.9324	0.332122	0.421432
4.9982	0.390206	0.407683		4.9982	0.255835	0.36804
5.0639	0.496659	0.466711		5.0639	0.348141	0.339925
5.1297	0.519688	0.534177		5.1297	0.438953	0.32187
5.1955	0.609101	0.603456		5.1955	0.426197	0.318204
5.2612	0.668632	0.673683		5.2612	0.263856	0.32249
5.327	0.733913	0.73437		5.327	0.346729	0.33446
5.3928	0.819803	0.800848		5.3928	0.325719	0.368193
5.4585	0.835962	0.838588		5.4585	0.272074	0.392666
5.5243	0.864413	0.869264		5.5243	0.465261	0.444432
5.59	0.925357	0.896052		5.59	0.529524	0.513701
5.6558	0.925806	0.916424		5.6558	0.646146	0.616206
5.7216	0.954055	0.926073		5.7216	0.760629	0.699385
5.7873	0.828481	0.938984		5.7873	0.717935	0.781889
5.8531	0.942085	0.942829		5.8531	0.858855	0.856249
5.9189	1	0.947035		5.9189	0.859145	0.894471
5.9846	0.937327	0.940968		5.9846	1	0.888817
6.0504	0.929561	0.937599		6.0504	0.882113	0.893483
6.1162	0.950846	0.921431		6.1162	0.883882	0.882453
6.1819	0.847041	0.895037		6.1819	0.87571	0.853212
6.2477	0.882385	0.831964		6.2477	0.730081	0.790875
6.3135	0.774935	0.770177		6.3135	0.606715	0.721107
6.3792	0.735744	0.711942		6.3792	0.852433	0.647155
6.445	0.609531	0.641588		6.445	0.560649	0.580733
6.5108	0.533068	0.562663		6.5108	0.446742	0.497519
6.5765	0.465401	0.486713		6.5765	0.400344	0.410854
6.6423	0.448241	0.400957		6.6423	0.35047	0.353003
6.7081	0.359867	0.328944		6.7081	0.324994	0.292403
6.7738	0.25617	0.260715		6.7738	0.183975	0.216013
6.8396	0.174257	0.206703		6.8396	0.153792	0.204457
6.9054	0.133862	0.153844		6.9054	0.159936	0.184903
6.9711	0.0945178	0.108639		6.9711	0.252945	0.168239
7.0369	0.0827725	0.0738672		7.0369	0.131539	0.149582
7.1027	0.0708538	0.0572748		7.1027	0.102731	0.13032
7.1684	0.0521096	0.0488166		7.1684	0.199942	0.12321
7.2342	0.0289433	0.0431682		7.2342	0.0973365	0.106102
7.2999	0.0405616	0.0379942		7.2999	0.0752637	0.0870878
7.3657	0.0442242	0.0327524		7.3657	0.0170594	0.0691714
7.4315	0.0337972	0.026443		7.4315	0.0443635	0.0644519
7.4972	0.0190426	0.0216626		7.4972	0.0881781	0.0520557
7.563	0.0198228	0.0195042		7.563	0.0599089	0.0371192
7.6288	0.0146907	0.016728		7.6288	0.0521951	0.0387747
7.6945	0.00274104	0.0112348		7.6945	0.0292942	0.0366024
7.7603	0.00867674	0.00845757		7.7603	0.00649108	0.0331967
7.8261	0.0119417	0.00696473		7.8261	0.0241358	0.0213506
7.8918	0.0140389	0.00670547		7.8918	0.0177012	0.00627723
7.9576	0.002647	0.0063235		7.9576	0.0161353	0.0136329
8.0234	0.00332875	0.00678227		8.0234	0.0206512	0.0222063
8.0891	0.00917711	0.00862819		8.0891	0.00747983	0.030002
8.1549	0.00341689	0.00904423		8.1549	0.0158002	0.0358733
8.2207	0.0125866	0.0095196		8.2207	0.0335398	0.0368206
8.2864	0.0125932	0.010753		8.2864	0.119251	0.0367278
8.3522	0.0123301	0.0117018		8.3522	0.0274035	0.0341762
8.418	0.0169082	0.0108529		8.418	0.00831012	0.0293494
8.4837	0.00834601	0.0098799		8.4837	0.0134156	0.0240299
8.5495	0.00649997	0.00917986		8.5495	0.0042603	0.0151901
8.6153	0.00732944	0.00716687		8.6153	0.000979645	0.00577177
8.681	0.0014883	0.00624281		8.681	0.00563414	-0.00254955
8.7468	0.00551101	0.00528692		8.7468	0.00591235	0.00310258
8.8125	0.00855549	0.0048117		8.8125	0.0092955	0.00520938
8.8783	0.00524583	0.00498821		8.8783	0.00616414	0.00740927
8.9441	0.00459321	0.00442511		8.9441	0.00807412	0.00961974
9.0098	0.00620354	0.0053668		9.0098	0.00521289	0.0110394
9.0756	0.00375254	0.00643969		9.0756	0.00949896	0.0114891
9.1414	0.00542577	0.00553159		9.1414	0.0250946	0.0137839
9.2071	0.00313646	0.00627503		9.2071	0.017878	0.0140446
9.2729	0.00784093	0.0065672		9.2729	0.00675504	0.015298
9.3387	0.0145822	0.00591126		9.3387	0.0140745	0.0157139
9.4044	0.00351382	0.00605112		9.4044	0.015262	0.0153539
9.4702	0.00142006	0.00658829		9.4702	0.0201786	0.0132119
9.536	0.0118109	0.00706999		9.536	0.00425617	0.00821871
9.6017	0	0.00658529		9.6017	0.0161481	0.00688965
9.6675	0.00518915	0.00646756		9.6675	0.00798735	0.0105469
9.7333	0.0133164	0.00691575		9.7333	0.00399914	0.0125439
9.799	0.00879613	0.00854685		9.799	0.00218727	0.0119111
9.8648	0.00751593	0.00824677		9.8648	0.00423269	0.0147029
9.9306	0.00341232	0.00724316		9.9306	0.0349842	0.0149498
9.9963	0.0124647	0.00756079		9.9963	0.0424868	0.0173449
10.0621	0.00693361	0.00574981		10.0621	0.00716443	0.0207333
10.1279	0.00414261	0.00468169		10.1279	0.00140044	0.0206699
10.1936	0.000708575	0.00467655		10.1936	0.0294926	0.019208
10.2594	0.00533116	0.00487657		10.2594	0.00454765	0.018939
10.3252	0.00562727	0.00606125		10.3252	0.0392127	0.0162039
10.3909	0.00395094	0.00611905		10.3909	0.0107161	0.0159393
10.4567	0.0104105	0.0080106		10.4567	0.00425284	0.0172109
10.5224	0.00841481	0.00898913		10.5224	0.0204011	0.0143946
10.5882	0.0118558	0.0101458		10.5882	0.0261419	0.00976402
10.654	0.012791	0.00964668		10.654	0.000990829	0.00881343
10.7197	0.00569832	0.00804976		10.7197	0.000172418	0.00432991
10.7855	0.0103312	0.00684452		10.7855	0	0.00605329
10.8513	0.00454694	0.00588742		10.8513	0.00374689	0.00456971
10.917	0.00795448	0.00802204		10.917	0.00750975	0.00444777
10.9828	0.000459201	0.00960105		10.9828	0.00884575	0.00515246
11.0486	0.00391724	0.0107116		11.0486	0.00603816	0.00938081
11.1143	0.0171425	0.0114669		11.1143	0.015427	0.0124583
11.1801	0.0205111	0.0101263		11.1801	0.00789385	0.0140319
11.2459	0.023067	0.0105908		11.2459	0.0226929	0.0154018
11.3116	0.00397107	0.00990727		11.3116	0.0078072	0.0154685
11.3774	7.98123e-05	0.0101335		11.3774	0.023334	0.0147742
11.4432	0.0014755	0.0080821		11.4432	0.017993	0.0138803
11.5089	0.0035359	0.00571673		11.5089	0.00797529	0.0119898
11.5747	0.0159322	0.00527661		11.5747	0.0128017	0.0123257
11.6405	0.00760539	0.00636515		11.6405	0.00457646	0.0114331
11.7062	0.0110709	0.0092547		11.7062	0.00844008	0.0114682
11.772	0.00391355	0.010682		11.772	0.0134305	0.0114249
11.8378	0.010709	0.011334		11.8378	0.0150946	0.0104186
11.9035	0.0131826	0.011561		11.9035	0.0204908	0.0130986
				11.9693	0.0110292	0.0148487

## Sheet: Fig3E
Ch-P4M SidM PM/Cytosol ratio	Control	VAPA KO
	4.05904	2.8306
	2.59452	2.47451
	3.5145	2.4326
	4.61194	3.31968
	3.74637	3.1912
	3.51582	2.4812
	4.31694	2.34478
	2.79908	3.40886
	4.09678	3.7142
	4.56465	2.51862
	3.15426	3.61317
	4.36185	2.3645
	3.26826	2.18182
	3.12597	3.74287
		3.36767
		2.92095

## Sheet: Fig3G
Anti-PI(4,5)P2 Peak Intensity (10^3AU)	Control	VAPA KO
	12837	7813.67
	15722.3	25998
	11218	9016
	17750.7	11231.3
	21038.7	16969
	37140.7	13740.3
	15703	16623
	25309.3	13373.3
	26445	12633.7
	22174.3	12798
	31523	21253.7
	35511.7	16960
	15508	6625.67
	18657.3	16825.7
	34984.3	10963
	27370	16441
	12373	10437
	22757.3	15754.3
	13132.7	21373.7
	13537	21766.7
	10624.7	27986.7
	24877	28132
	21232.7	31064.7
	15114.7	28030.3
	18696.7	22536.7
	43503	16157
	32815.3	28193
	32327.3	20097.7
	26929.7	19395
	31511.7	22914.7
	46227	22406.3
	40060	30144.3
	38439.3	28795
	34074	35129.3
	34822.3	17243
	50134.7	14928
	33147	15264.7
	33269.3	22595.3
	40173.7	21530.7
	49135	13071.3
	47818.3	21807.7
	51106.5	20479.7
	31191.3	22231.3
	52164	20676.7
	29307	20698
	24970	15382.3
	41172	16392.3
	35589.3	16934.7
	18791	15967
	33373.3	16485.7
	43317.7	21491.3
	30092.3	17960
	39572
	33095
	36093
	31168.7
	31557.3
	31579

## Sheet: Fig3H
Control				VAPA KO
Distance to origin (mm)	Normalized RFP-PH-PLCδ1 grey levels	Smoothed		Distance to origin (mm)	Normalized RFP-PH-PLCδ1 grey levels	Smoothed
0	0.129785	0.128003		0	0.353389	0.337641
0.0659	0.136134	0.131946		0.0659	0.331017	0.334734
0.1318	0.122337	0.136852		0.1318	0.291031	0.328817
0.1977	0.125438	0.140313		0.1977	0.331887	0.321262
0.2636	0.151373	0.144512		0.2636	0.307804	0.310111
0.3295	0.163252	0.149618		0.3295	0.308383	0.295473
0.3954	0.163923	0.151778		0.3954	0.321684	0.284005
0.4613	0.150352	0.153491		0.4613	0.26483	0.277784
0.5272	0.143175	0.154996		0.5272	0.256943	0.272525
0.593	0.15639	0.152359		0.593	0.239453	0.265645
0.6589	0.151996	0.147879		0.6589	0.247457	0.266684
0.7248	0.136169	0.145334		0.7248	0.282746	0.265432
0.7907	0.150582	0.144761		0.7907	0.286071	0.265763
0.8566	0.145754	0.148513		0.8566	0.278544	0.272834
0.9225	0.14306	0.149934		0.9225	0.282625	0.275818
0.9884	0.150614	0.149579		0.9884	0.269036	0.271715
1.0543	0.152632	0.149563		1.0543	0.248513	0.262223
1.1202	0.156456	0.150658		1.1202	0.258197	0.255299
1.1861	0.163389	0.150007		1.1861	0.26334	0.250162
1.252	0.137466	0.149162		1.252	0.244148	0.244535
1.3179	0.141984	0.149374		1.3179	0.219796	0.248424
1.3838	0.14405	0.150631		1.3838	0.25347	0.252294
1.4497	0.156918	0.149978		1.4497	0.275235	0.257993
1.5156	0.152055	0.150197		1.5156	0.247742	0.259814
1.5815	0.148438	0.151082		1.5815	0.266837	0.26636
1.6474	0.165412	0.154022		1.6474	0.312947	0.278884
1.7132	0.158547	0.156167		1.7132	0.258852	0.289421
1.7791	0.140349	0.158142		1.7791	0.284807	0.294892
1.845	0.15872	0.158029		1.845	0.283261	0.292166
1.9109	0.158022	0.159163		1.9109	0.320312	0.292837
1.9768	0.164514	0.15972		1.9768	0.317914	0.293992
2.0427	0.170455	0.156988		2.0427	0.287061	0.291286
2.1086	0.155703	0.15633		2.1086	0.271974	0.291311
2.1745	0.147836	0.15671		2.1745	0.240084	0.28192
2.2404	0.154552	0.152668		2.2404	0.305325	0.275974
2.3063	0.149939	0.153159		2.3063	0.30135	0.265874
2.3722	0.141388	0.151037		2.3722	0.244047	0.259142
2.4381	0.156884	0.151162		2.4381	0.245332	0.249794
2.504	0.160095	0.152954		2.504	0.247862	0.247721
2.5699	0.14959	0.153194		2.5699	0.258974	0.253129
2.6358	0.166434	0.154357		2.6358	0.226739	0.252159
2.7017	0.140305	0.154915		2.7017	0.23643	0.25654
2.7676	0.159645	0.155713		2.7676	0.250686	0.262973
2.8334	0.153248	0.15614		2.8334	0.329942	0.271494
2.8993	0.155318	0.158301		2.8993	0.307192	0.276545
2.9652	0.166333	0.159907		2.9652	0.249166	0.277846
3.0311	0.15383	0.158814		3.0311	0.25235	0.280918
3.097	0.167861	0.161259		3.097	0.278865	0.283411
3.1629	0.168274	0.161641		3.1629	0.310473	0.280331
3.2288	0.159745	0.162717		3.2288	0.256253	0.276603
3.2947	0.152804	0.164015		3.2947	0.268128	0.28086
3.3606	0.159645	0.165615		3.3606	0.297735	0.282477
3.4265	0.176415	0.167881		3.4265	0.303227	0.27699
3.4924	0.174295	0.169035		3.4924	0.256262	0.265715
3.5583	0.167198	0.171082		3.5583	0.266733	0.260524
3.6242	0.179314	0.175599		3.6242	0.241437	0.257732
3.6901	0.175006	0.17695		3.6901	0.23439	0.24877
3.756	0.171516	0.174912		3.756	0.245615	0.239621
3.8219	0.17821	0.172375		3.8219	0.235457	0.232771
3.8878	0.175464	0.172356		3.8878	0.263683	0.23572
3.9536	0.182577	0.174236		3.9536	0.223533	0.242291
4.0195	0.161808	0.177683		4.0195	0.236325	0.248505
4.0854	0.171908	0.184397		4.0854	0.239228	0.252657
4.1513	0.188028	0.18935		4.1513	0.250992	0.262375
4.2172	0.201062	0.195102		4.2172	0.300191	0.270354
4.2831	0.212527	0.200611		4.2831	0.291951	0.266521
4.349	0.217617	0.208723		4.349	0.248382	0.269801
4.4149	0.211802	0.216694		4.4149	0.276266	0.266934
4.4808	0.202418	0.219958		4.4808	0.291903	0.263406
4.5467	0.221612	0.219166		4.5467	0.227587	0.260131
4.6126	0.21843	0.218186		4.6126	0.21499	0.257294
4.6785	0.234575	0.215594		4.6785	0.290654	0.257312
4.7444	0.209902	0.210167		4.7444	0.271412	0.270322
4.8103	0.203723	0.205983		4.8103	0.284574	0.273262
4.8762	0.193335	0.199958		4.8762	0.298951	0.285841
4.9421	0.19928	0.192521		4.9421	0.300568	0.302307
5.008	0.182064	0.187648		5.008	0.313316	0.328884
5.0738	0.176401	0.185682		5.0738	0.393948	0.37002
5.1397	0.196427	0.18954		5.1397	0.353876	0.437396
5.2056	0.189668	0.190138		5.2056	0.46818	0.499099
5.2715	0.202314	0.194825		5.2715	0.525785	0.553644
5.3374	0.211394	0.203463		5.3374	0.687119	0.60264
5.4033	0.229157	0.218172		5.4033	0.730383	0.640276
5.4692	0.235941	0.238338		5.4692	0.712361	0.657932
5.5351	0.248028	0.269104		5.5351	0.608456	0.668509
5.601	0.320085	0.324059		5.601	0.621173	0.658839
5.6669	0.37293	0.394251		5.6669	0.652606	0.651613
5.7328	0.442754	0.476424		5.7328	0.651546	0.659552
5.7987	0.54555	0.56487		5.7987	0.649843	0.702502
5.8646	0.671363	0.65212		5.8646	0.720861	0.764279
5.9305	0.794879	0.730596		5.9305	0.797169	0.825962
5.9964	0.82464	0.795829		5.9964	0.893485	0.871768
6.0623	0.856935	0.856458		6.0623	1	0.903545
6.1282	0.882779	0.907015		6.1282	0.98169	0.909273
6.194	0.896788	0.939421		6.194	0.895257	0.89197
6.2599	0.929523	0.954402		6.2599	0.812275	0.850561
6.3258	0.969158	0.960318		6.3258	0.779747	0.788698
6.3917	1	0.955508		6.3917	0.693003	0.712241
6.4576	0.963392	0.930738		6.4576	0.595997	0.640008
6.5235	0.880885	0.884151		6.5235	0.601074	0.576558
6.5894	0.813035	0.817621		6.5894	0.548515	0.522871
6.6553	0.742688	0.727529		6.6553	0.463886	0.477735
6.7212	0.616411	0.622551		6.7212	0.422256	0.436471
6.7871	0.516127	0.513798		6.7871	0.405004	0.401172
6.853	0.409496	0.413582		6.853	0.327852	0.367879
6.9189	0.317148	0.323237		6.9189	0.339177	0.322443
6.9848	0.213538	0.242219		6.9848	0.324847	0.279776
7.0507	0.160941	0.175814		7.0507	0.258494	0.239578
7.1166	0.124582	0.128748		7.1166	0.195688	0.197593
7.1825	0.100918	0.0931046		7.1825	0.155572	0.158665
7.2484	0.0747355	0.0700348		7.2484	0.0762838	0.124632
7.3142	0.0577913	0.0566321		7.3142	0.0744332	0.0876694
7.3801	0.049141	0.0491814		7.3801	0.079466	0.065317
7.446	0.0472536	0.0416202		7.446	0.0694152	0.0533714
7.5119	0.0352935	0.0368482		7.5119	0.0578659	0.0518198
7.5778	0.0355516	0.0330248		7.5778	0.0373036	0.0522934
7.6437	0.0342487	0.0307951		7.6437	0.0425207	0.0565124
7.7096	0.0244386	0.0286882		7.7096	0.070448	0.0524999
7.7755	0.0264852	0.0261103		7.7755	0.0520358	0.053522
7.8414	0.0288992	0.0234559		7.8414	0.0761206	0.0540584
7.9073	0.0188922	0.0215091		7.9073	0.0436187	0.0559425
7.9732	0.0200854	0.018278		7.9732	0.0498871	0.055309
8.0391	0.0180264	0.017286		8.0391	0.0429933	0.0537892
8.105	0.0142685	0.0171598		8.105	0.0712447	0.0506652
8.1709	0.0139953	0.0168692		8.1709	0.0365892	0.048669
8.2368	0.0143042	0.0167045		8.2368	0.0524541	0.0463942
8.3027	0.0156504	0.0170979		8.3027	0.041185	0.0472562
8.3686	0.0260235	0.0159047		8.3686	0.0568295	0.0437749
8.4344	0.0170579	0.0151423		8.4344	0.0366329	0.0442937
8.5003	0.0156118	0.0146041		8.5003	0.0339654	0.0444161
8.5662	0.00913704	0.0131033		8.5662	0.0499016	0.0451516
8.6321	0.00829261	0.0123389		8.6321	0.0385891	0.0416771
8.698	0.00736254	0.0105702		8.698	0.0429154	0.0419085
8.7639	0.0128794	0.00924252		8.7639	0.0606324	0.0387239
8.8298	0.0123962	0.0102547		8.8298	0.0339118	0.0361346
8.8957	0.00973889	0.0112274		8.8957	0.0143588	0.032152
8.9616	0.0147371	0.0120576		8.9616	0.0323144	0.0301394
9.0275	0.00663062	0.012055		9.0275	0.0374071	0.028797
9.0934	0.0138606	0.011332		9.0934	0.0147314	0.0276364
9.1593	0.0135532	0.00983018		9.1593	0.0242488	0.0302065
9.2252	0.00986663	0.00896777		9.2252	0.0413487	0.0355249
9.2911	0.00575616	0.00770139		9.2911	0.0476151	0.0382894
9.357	0.00599387	0.00621151		9.357	0.029943	0.0392932
9.4229	0.00455352	0.00652741		9.4229	0.0464525	0.0387349
9.4888	0.00541506	0.0066848		9.4888	0.0488325	0.0370428
9.5546	0.00739477	0.00792131		9.5546	0.0267767	0.0341711
9.6205	0.00623622	0.00913966		9.6205	0.0286909	0.0323968
9.6864	0.0119098	0.010229		9.6864	0.031586	0.0300269
9.7523	0.0167162	0.0107302		9.7523	0.0120757	0.025095
9.8182	0.0131161	0.01087		9.8182	0.0260665	0.0225906
9.8841	0.00840698	0.00987267		9.8841	0.0453176	0.0263364
9.95	0.00560095	0.00904999		9.95	0.031911	0.0340231
10.0159	0.00734474	0.00765713		10.0159	0.0133741	0.0379529
10.0818	0.0059826	0.00576891		10.0818	0.0247106	0.0437916
10.1477	0.00440519	0.00434288		10.1477	0.0746038	0.0485536
10.2136	0.0028893	0.00341492		10.2136	0.0688673	0.0474412
10.2795	0.00685082	0.00283372		10.2795	0.0532707	0.0490856
10.3454	0.00134383	0.00263806		10.3454	0.0367087	0.0528907
10.4113	0.00320929	0.00318459		10.4113	0.0523464	0.0526168
10.4772	0.00256002	0.00538343		10.4772	0.0343927	0.0466185
10.5431	0.00290131	0.00810095		10.5431	0.0374003	0.0399137
10.609	0.00963035	0.0104044		10.609	0.059811	0.0366576
10.6748	0.0149061	0.0120936		10.6748	0.0378576	0.0322253
10.7407	0.0189129	0.0132211		10.7407	0.023578	0.032118
10.8066	0.0196952	0.014178		10.8066	0.0289886	0.0374326
10.8725	0.0136185	0.014553		10.8725	0.0356775	0.0400053
10.9384	0.00924128	0.0138893		10.9384	0.0242541	0.0433237
11.0043	0.00914497	0.0122882		11.0043	0.0429188	0.0489198
11.0702	0.00894357	0.0120327		11.0702	0.0871155	0.0545159
11.1361	0.0168827	0.0121038		11.1361	0.0804202	0.0591779
11.202	0.011316	0.0126893		11.202	0.0260756	0.0577472
11.2679	0.0122836	0.0145084		11.2679	0.0662519	0.0500484
11.3338	0.0154013	0.0140646		11.3338	0.0512295	0.0407255
11.3997	0.0199447	0.0130724		11.3997	0.0199939	0.0306793
11.4656	0.0114196	0.0124198		11.4656	0.0305067	0.022545
11.5315	0.0105235	0.0109524		11.5315	0.000605159	0.0214354
11.5974	0.0103906	0.0109456		11.5974	0	0.0244465
11.6633	0	0.00983206		11.6633	0.031328	0.0219014
11.7292	0.0123256	0.00950447		11.7292	0.0480707	0.0269879
11.795	0.0136879	0.00855815		11.795	0.0390195	0.0317166
11.8609	0.00847793	0.00844954		11.8609	0.034478	0.0370319
11.9268	0.0118947	0.00830741		11.9268	0.0374015	0.0399956
11.9927	0.00675616	0.00943911		11.9927	0.0317663	0.0402042

## Sheet: Fig3I
RFP-PH-PLCδ1 PM/Cytosol ratio	Control	VAPA KO
	3.14347	3.38908
	4.38075	3.68109
	3.99582	2.288
	3.37747	3.20093
	3.25238	3.31097
	4.10117	2.96186
	3.20854	2.93002
	3.47988	2.57728
	3.34667	2.60665
	4.45263	3.6937
	3.09793	3.35603
	3.85826	2.81953
	3.968	2.65329
	4.02097	2.57609
	3.77524	2.58656
	3.59491	3.2351
	3.22539	3.11341
	4.35169	3.5545
	3.01072	2.78975
	3.83568	2.6388
	3.32671	3.66914
	3.10442	3.81188
	3.13021	3.39633
	3.74204	5.27508
	3.92064	2.6203
	3.51328	2.8717
	4.97986
