# Supplementary material for: The ER tether VAPA is required for proper cell motility and anchors ER-PM contact sites to focal adhesions
Source: eLife journal article supplement (doi:10.7554/elife.85962), 2024-02-08
Supplement: fig4-data1 [file Figure4.xlsx]

## Sheet: Fig4F
GFP-MAPPER foci life time (min)	Control	VAPA KO
	2.5	1
	11	2
	5	3
	21	3
	13	2
	2	8
	12.5	1.5
	10.5	3.5
	12	3.5
	7	4
	27.5	1
	27	4
	21	6
	5	1
	8	3.5
	12	4
	2.5	6.67
	12	6
	9	1
	11	11.67
	9.5	17.33
	11.5	3.67
	14	1.33
	4.5	8
	2	0.67
	8	17
	17	0.5
	5.5	4
	4	4.33
	2	3.33
	5.5	6
	21.5	5.67
	18.5	2.67
	16	12.33
	25.83	5.33
	17.83	3
	3.5	9.67
	13.33	24
	9.5	1.33
	3.17	5.67
	8.17	1.67
	10.33	2.67
	15	4.67
	10	7.33
	18.83	7.33
	5	8.67
	1.33	1.33
	40.67	0.33
	15	2
	12	1.17
	6.33	1.83
	19.33	2
	13	3
	4.33	2
	0.67	8.67
	60.33	4
	63.33	6.67
	68	22.17
	62	15
	15	7.67
	14	15.33
	3.33	7.33
	7	11.67
	24	10
	10.33	20.67
	7.67	12.33
	20.17	4
	10.67	3.33
	29	3
	14.67	4
	9	10.33
	14.67	14
	30.67	11.67
	15.33	6
	37.67	6.67
	19.33	13.33
	32.33
	24.67
	8
	32.33
	4
	65
	26
	6.33
	35.33
	45.33
	36.33
	27.33
	30
	14.67
	47.33

## Sheet: Fig4G
GFP-MAPPER foci speed (µm/min)	Control	VAPA KO
	0.45931	0.50069
	0.401379	0.641739
	0.338823	0.6
	0.44069	0.74069
	0.38069	0.645517
	0.49	0.547826
	0.368	0.651428
	0.448966	1.04069
	0.343448	1.585
	0.353684	0.935173
	0.331035	1.14
	0.165517	0.988889
	0.275556	0.7
	0.322759	0.96
	0.211035	0.765517
	0.190345	1.25
	0.198621	1.515
	0.205714	1.03035
	0.368571	0.711724
	0.211035	0.69931
	0.223448	1.03714
	0.165517	0.943448
	0.144828	0.595714
	0.401379	1.65375
	0.401379	1.04455
	0.277241	0.691304
	0.331035	1.10357
	0.264828	0.777931
	0.256552	1.436
	0.277241	0.826
	0.402	0.942
	0.190345	1
	0.0331034	0.96
	0.211035	0.948
	0.585517	1.062
	0.397241	1.41517
	0.297931	1.148
	0.302069	0.415862
	0.297931	0.335172
	0.177931	0.467586
	0.177931	0.653793
	0.401379	0.488276
	0.132414	0.572143
	1.11474	0.788182
	0.231724	0.335172
	0.310345	0.484286
	0.397241	0.382759
	0.198621	1.78286
	0.702	1.93714
	0.945517	1.44
	0.50069	2.088
		0.97
		1.65158
		1.27826
		2.20714
		1.562
		1.15333
