# Supplementary material for: The ER tether VAPA is required for proper cell motility and anchors ER-PM contact sites to focal adhesions
Source: eLife journal article supplement (doi:10.7554/elife.85962), 2024-02-08
Supplement: fig4-figsupp1-data1 [file Figure4-figSup1.xlsx]

## Sheet: Fig4-figSup1A
Linescan1				Linescan1
Distance to origin (mm)	Normalized grey levels GFP-MAPPER	Normalized grey levels VAPA		Distance to origin (mm)	Normalized grey levels GFP-MAPPER	Normalized grey levels VAPA
0	0.0109059	0.0142258		0	0.002221	0
0.065894	0.00625562	0.0461676		0.06589	0.455667	0.5159
0.131788	0.00474029	0.165099		0.13179	0.662492	0.767726
0.197682	0.0165869	0.355504		0.19768	0.924467	0.909942
0.263576	0.103074	0.475448		0.26358	1	1
0.329471	0.133309	0.780946		0.32947	0.713322	0.99621
0.395365	0.333898	0.894911		0.39536	0.320082	0.969778
0.461259	0.791934	0.968611		0.46126	0.20374	0.814867
0.527153	1	1		0.52715	0.0406965	0.355619
0.593047	0.90391	0.955021		0.59305	0.0690623	0.33597
0.658941	0.59456	0.83354		0.65894	0	0.301194
0.724835	0.387219	0.551169		0.72484	0.0978508	0.353485
0.790729	0.230104	0.248392		0.79073	0.13873	0.328579
0.856623	0.108851	0.142473		0.85662	0.188832	0.377352
0.922518	0.0488241	0.0665805		0.92252	0.62991	0.624228
0.988412	0.0107628	0		0.98841	0.8274	0.623201
1.05431	0	0.0277518		1.05431	0.864218	0.529016
				1.1202	0.895627	0.132052
				1.18609	0.821672	0.143468
				1.25199	0.397404	0.188957
				1.31788	0.0597417	0.364288

## Sheet: Fig4-figSup1D
ER portion in contact with the PM (nm)	Control	VAPA KO
	190.5	62.2
	98.6	60
	182	82.5714
	109.75	135.5
	84.3333	165.833
	75	119
	133	162.667
	76.4	130.625
	145.111	136.75
	105.8	140
	67.5	175
	115	202.5
	115.25	160.857
	238.3	153.5
	238
	93
	110.3
	79.25
	181.125
	214.6
	152.375
	195.471
	114.667
	130.4
	167.125

## Sheet: Fig4-figSup1E
Percentage of the PM in contact with the ER (%)	Control	VAPA KO
	3.31747	0.648322
	1.80408	0.447427
	2.00143	2.67092
	1.07915	3.0799
	1.16327	2.06055
	4.83767	1.97572
	1.19005	3.0677
	2.56256	3.27905
	3.27228	1.69797
	0.745249	1.76589
	0.923803	1.48311
	2.52345	2.64332
	1.46547	2.33557
	3.55475	1.75192
	1.70717
	1.40368
	1.30991
	0.920281
	1.40481
	1.90946
	4.78903
	3.69987
	1.41648
	1.29398
	1.58874
