# Supplementary material for: The ER tether VAPA is required for proper cell motility and anchors ER-PM contact sites to focal adhesions
Source: eLife journal article supplement (doi:10.7554/elife.85962), 2024-02-08
Supplement: fig5-data1 [file Figure5.xlsx]

## Sheet: Fig5B
Focal adhesions assembly rate (min-1)	Control	VAPA KO
	0.0258	0.0297
	0.0667	0.0273
	0.0684	0.0324
	0.0571	0.1087
	0.0316	0.1058
	0.0374	0.0464
	0.0241	0.0336
	0.0608	0.0676
	0.0373	0.132
	0.0536	0.1033
	0.0298	0.0607
	0.0443	0.0367
	0.0442	0.0614
	0.0522	0.0819
	0.0593	0.01156
	0.0685	0.0636
	0.0316	0.148
	0.0759	0.1119
	0.036	0.0611
	0.0241	0.0709
	0.0195	0.0289
	0.0454	0.0761
	0.0384	0.0388
	0.035	0.0406
	0.0366	0.0404
	0.0696	0.0645
	0.0372	0.0207
	0.0305	0.0469
	0.0295	0.074
	0.0568	0.0718
	0.0539	0.0557
	0.0613	0.0465
	0.09386	0.0157
	0.0754	0.0207
	0.0792	0.0676
	0.0497	0.0431
	0.0503	0.0379
	0.0246	0.019
	0.0386	0.0703
	0.0874	0.0744
	0.0916	0.0675
	0.1012	0.0354
	0.0311	0.0194
	0.0253	0.037
	0.0465	0.0607
	0.0178	0.0249
	0.0691	0.0516
	0.0367	0.0892
	0.0593	0.0422
	0.0297	0.0426
	0.027	0.0308
	0.0304	0.035
	0.0461	0.0619
	0.0209	0.024
	0.0315	0.0316
	0.0578	0.0573
	0.0589	0.0258
	0.0755	0.0478
	0.0546	0.0336
	0.038	0.0646
	0.0705	0.0486
	0.0548	0.0457
	0.0494	0.0249
	0.0339	0.0641
	0.0278	0.0362
	0.0658	0.0353
	0.0238	0.0188
	0.0216	0.0313
	0.0445	0.0574
	0.0714	0.0425
	0.0286	0.0788
	0.0398	0.0266
	0.0544	0.0173
	0.0506	0.0409
	0.0196	0.0483
	0.0496	0.0351
	0.0274	0.0329
	0.0364	0.0521
	0.0547	0.0336
	0.0521	0.0459
	0.067	0.0496
	0.0297	0.0303
	0.0543	0.0562
	0.0855	0.0282
	0.0768	0.0279
	0.0626	0.0305
	0.0277	0.0504
	0.029	0.0873
	0.0584	0.0761
	0.1272	0.0624
	0.0447	0.0488
	0.0817	0.0258
	0.0325	0.0347
	0.0558	0.0583
	0.0571	0.0236
	0.0762	0.0737
	0.072	0.0225
	0.0485	0.0231
	0.0438	0.0361
	0.0611	0.0987
	0.0572	0.018
	0.0213	0.0605
	0.0812	0.0856
	0.0297	0.0787
	0.0314	0.0889
	0.0421	0.0163
	0.0478	0.0829
	0.025	0.1099
	0.1034	0.0412
	0.0918	0.0242
	0.0559	0.0516
	0.0953	0.0441
	0.079	0.0327
	0.0445	0.0466
	0.0668	0.0433
	0.0505	0.0904
	0.1002	0.0522
	0.0683	0.1086
	0.0452	0.0776
	0.0413	0.0531
	0.0338	0.0457
	0.0218	0.0504
	0.0435	0.0429
	0.0769	0.0257
	0.0848	0.0367
	0.0564	0.02423
	0.0638	0.091
	0.0174	0.0953
	0.0315	0.0144
	0.0649	0.0364
	0.067	0.0525
	0.0314	0.0434
	0.0457	0.0966
	0.0367	0.0842
	0.0994	0.0522
	0.0368	0.0649
	0.029	0.0622
	0.0496	0.033
	0.0376	0.0883
	0.0461	0.0839
	0.0948	0.0474
	0.0717	0.0711
	0.0965	0.021
	0.0567	0.0396
	0.0803	0.0232
	0.0948	0.0434
	0.1019	0.0884
	0.0566	0.0323
	0.0679	0.036
	0.0461	0.0564
	0.0342	0.0268
	0.048	0.0605
	0.1164	0.0653
	0.0503	0.0295
	0.0874	0.0307
	0.0586	0.131
	0.0812	0.0501
	0.0977	0.0788
	0.0551	0.0355
	0.058	0.0413
	0.0545	0.0529
	0.0668	0.0736
	0.0584	0.045
	0.0382	0.0515
	0.0773	0.0617
	0.0598	0.063
	0.1243	0.0869
	0.0855	0.0443
	0.033	0.0633
	0.0403	0.033
	0.0845	0.0491
	0.0375	0.0564
	0.0423	0.0215
	0.0504	0.0336
	0.0612	0.0392
	0.0579	0.0212
	0.02	0.1245
	0.0274	0.0602
	0.0619	0.0494
	0.067	0.0544
	0.0578	0.0517
	0.077	0.11
	0.0373	0.0195
	0.055	0.1608
	0.0995	0.0901
	0.0552	0.0879
	0.0478	0.03
	0.05	0.0478
	0.0386	0.0202
	0.0742	0.0257
	0.0205	0.0353
	0.0354	0.0648
	0.049	0.0457
	0.0367	0.0772
	0.0441	0.0214
	0.1228	0.0815
	0.0417	0.0918
	0.0322	0.0152
	0.0608	0.0422
	0.0119	0.0624
	0.0499	0.0394
	0.058	0.062
	0.0531	0.0336
	0.0624	0.0768
	0.1051	0.0546
	0.00657	0.0825
	0.069	0.1259
	0.0324	0.0858
	0.0477	0.0374
	0.0707	0.0607
	0.0579	0.0543
	0.066	0.1171
	0.0839	0.0814
	0.0977	0.0585
	0.1093	0.0211
	0.1407	0.0853
		0.0436
		0.0451
		0.055
		0.0797
		0.0193
		0.0538
		0.0665
		0.0516
		0.0485
		0.0839
		0.0677
		0.0468
		0.05
		0.0349
		0.0431
		0.0497
		0.0559
		0.0403
		0.0262
		0.0164
		0.0589
		0.0869
		0.0434
		0.076
		0.0662
		0.0439
		0.0842
		0.054
		0.072
		0.0467
		0.0489
		0.0482
		0.0712
		0.0387
		0.0705
		0.0566
		0.0616
		0.0402
		0.0949
		0.0235
		0.0865
		0.1016
		0.0804
		0.0792
		0.0975
		0.0493
		0.0235
		0.0466
		0.0288
		0.0567
		0.039
		0.0372
		0.0705
		0.0479
		0.0212
		0.0479
		0.0542
		0.0384
		0.0911
		0.0258
		0.0438
		0.0678
		0.0573
		0.045
		0.0268
		0.035
		0.0538
		0.0852
		0.0521
		0.0335
		0.1465
		0.031
		0.0536
		0.033
		0.0847
		0.0225
		0.0316
		0.0655
		0.0579
		0.0274
		0.052
		0.0723
		0.0336
		0.0486
		0.0197
		0.065
		0.0337
		0.0247
		0.034
		0.0411
		0.0766
		0.0209
		0.0359
		0.0764
		0.0212
		0.0631
		0.0183
		0.0511
		0.051
		0.0281
		0.0595
		0.0245
		0.0264
		0.0555
		0.0226
		0.0537
		0.0302
		0.0149
		0.0547
		0.0386
		0.0299
		0.0214
		0.0432
		0.0312
		0.0272
		0.0417
		0.0224
		0.0435
		0.0606
		0.0297
		0.0378
		0.0257
		0.0497
		0.0189
		0.0303

## Sheet: Fig5C
Focal adhesions disassembly rate (min-1)	Control	VAPA KO
	0.0094	0.1709
	0.0235	0.0663
	0.0429	0.0344
	0.0257	0.0696
	0.0277	0.0517
	0.0194	0.0728
	0.0229	0.0344
	0.0095	0.0379
	0.0204	0.0451
	0.0444	0.0261
	0.0122	0.0368
	0.0328	0.0404
	0.0337	0.0345
	0.041	0.0406
	0.0213	0.0515
	0.0254	0.0381
	0.0224	0.0479
	0.0224	0.028
	0.0312	0.0505
	0.0136	0.0307
	0.0301	0.055
	0.0314	0.0339
	0.0171	0.0644
	0.0146	0.0712
	0.0402	0.0526
	0.0286	0.0467
	0.0477	0.0563
	0.0575	0.0525
	0.0209	0.0789
	0.0182	0.0395
	0.0455	0.0822
	0.0357	0.0482
	0.0286	0.0567
	0.076	0.0409
	0.0997	0.0701
	0.0542	0.0306
	0.0254	0.0462
	0.0316	0.0366
	0.0257	0.0492
	0.0391	0.0179
	0.0216	0.0508
	0.0637	0.0673
	0.0332	0.0227
	0.0235	0.054
	0.0359	0.0443
	0.041	0.0413
	0.0369	0.0358
	0.0426	0.0222
	0.0552	0.0175
	0.0338	0.0571
	0.0416	0.0311
	0.0383	0.0244
	0.0266	0.0519
	0.0769	0.1032
	0.0579	0.0725
	0.0647	0.025
	0.0365	0.0545
	0.0365	0.0883
	0.0319	0.0584
	0.0329	0.0401
	0.0523	0.061
	0.0353	0.0929
	0.0273	0.0194
	0.0607	0.1046
	0.0379	0.0297
	0.0443	0.0542
	0.0367	0.0327
	0.0385	0.0449
	0.0412	0.0507
	0.0593	0.0428
	0.0505	0.0176
	0.0874	0.0642
	0.0455	0.0342
	0.0376	0.0351
	0.035	0.0447
	0.0564	0.0338
	0.062	0.0381
	0.0599	0.0479
	0.0466	0.0491
	0.0539	0.0362
	0.0364	0.0369
	0.0699	0.0561
	0.0595	0.0342
	0.0423	0.0607
	0.0368	0.0936
	0.0555	0.0639
	0.0554	0.0557
	0.0459	0.0256
	0.0977	0.0432
	0.0628	0.0264
	0.044	0.0625
	0.0297	0.0573
	0.0569	0.0372
	0.0608	0.0269
	0.0545	0.0301
	0.0781	0.0481
	0.0876	0.019
	0.0862	0.0546
	0.0369	0.0408
	0.0242	0.0132
	0.0875	0.0272
	0.0611	0.0423
	0.0637	0.0256
	0.0659	0.0297
	0.0634	0.0705
	0.0634	0.0405
	0.0428	0.0159
	0.0952	0.0299
	0.0787	0.0329
	0.0252	0.0373
	0.0299	0.0858
	0.0767	0.0535
	0.062	0.0536
	0.0672	0.0305
	0.0533	0.0498
	0.049	0.0263
	0.0456	0.0276
	0.0372	0.0303
	0.0455	0.0704
	0.1189	0.0337
	0.1746	0.0516
	0.1358	0.0267
	0.1286	0.0229
	0.075	0.0162
	0.1076	0.024
	0.1608	0.065
	0.0922	0.0246
	0.074	0.0447
	0.111	0.0299
	0.072	0.0284
	0.1056	0.0538
	0.1183	0.0318
	0.0774	0.0164
	0.046	0.0258
	0.0986	0.0194
	0.0555	0.0574
	0.0755	0.0493
	0.1027	0.0258
	0.0498	0.0414
	0.0937	0.0357
	0.0583	0.0113
	0.0194	0.0435
	0.0277	0.0356
	0.0179	0.0285
	0.0674	0.0487
	0.0493	0.0355
	0.0356	0.0282
	0.0719	0.0262
	0.0402	0.0456
	0.0687	0.0145
	0.0851	0.0335
	0.1022	0.0569
	0.0601	0.0198
	0.0636	0.0231
	0.0659	0.0497
	0.079	0.0236
	0.0375	0.0139
	0.0401	0.0439
	0.0334	0.0355
	0.0551	0.0251
	0.0298	0.0385
	0.0738	0.0301
	0.0971	0.032
	0.0495	0.0221
	0.088	0.0352
	0.0347	0.0249
	0.0585	0.0586
	0.0265	0.061
	0.0629	0.0276
	0.0964	0.0268
	0.0662	0.033
	0.0242	0.0129
	0.0766	0.035
	0.1006	0.0721
	0.0859	0.0468
	0.0507	0.0469
	0.0831	0.0591
	0.0344	0.0444
	0.1186	0.0269
	0.0313	0.0516
	0.0659	0.0404
	0.0621	0.0277
	0.0549	0.043
	0.0516	0.0224
	0.0648	0.0245
	0.0937	0.0679
	0.1201	0.0285
	0.036	0.0339
	0.0737	0.0314
	0.0335	0.0519
	0.0667	0.0501
	0.037	0.0534
	0.0553	0.0301
	0.0806	0.033
	0.0497	0.0592
	0.0529	0.0288
	0.0485	0.0358
	0.0753	0.0379
	0.0681	0.0321
	0.0585	0.0368
	0.0321	0.0227
		0.0422
		0.00537
		0.0442
		0.0544
		0.0367
		0.0554
		0.0631
		0.0461
		0.0335
		0.04258
		0.0742
		0.0333
		0.0561
		0.0298
		0.0341
		0.0511
		0.0373
		0.0344
		0.0429
		0.0609
		0.0218
		0.0517
		0.0293
		0.0375
		0.034
		0.0467
		0.0475
		0.0343
		0.0213
		0.027
		0.0354
		0.0437
		0.0571
		0.044
		0.0272
		0.0661
		0.0586
		0.0701
		0.0587
		0.0347
		0.0633
		0.0289
		0.054
		0.0295
		0.0421
		0.0368
		0.0422
		0.0469
		0.0525
		0.0739
		0.0501
		0.0357
		0.0484
		0.0378
		0.0365
		0.0464
		0.0241
		0.0507
		0.0357
		0.0224
		0.0634
		0.0682
		0.033
		0.0298
		0.0406
		0.0493
		0.0629
		0.0327
		0.0745
		0.0561
		0.0272
		0.0531
		0.0386
		0.0349
		0.0403
		0.111
		0.0456
		0.12
		0.01039
		0.0469
		0.1309
		0.0498
		0.0655
		0.0495
		0.0515
		0.0422
		0.0905
		0.0347
		0.0456
		0.0386
		0.0594
		0.0618
		0.01094
		0.0508
		0.0326
		0.0484
		0.043
		0.0584
		0.046
		0.1118
		0.0392
		0.0685
		0.0297
		0.0446
		0.0598
		0.0352
		0.0412
		0.0404
		0.0148
		0.0314
		0.044
		0.0337
		0.0145
		0.0654
		0.0566
		0.0463
		0.02
		0.0577
		0.0215
		0.0356
		0.0218
		0.0414
		0.0342
		0.0371
		0.0411
		0.0784
		0.0396
		0.0393
		0.04
		0.0972
		0.0282
		0.0318
		0.0315
		0.0372
		0.0696
		0.0521
		0.0213
		0.103
		0.02
		0.0163
		0.0276
		0.0398
		0.0208
		0.0258
		0.027
		0.0396
		0.021
		0.0229
		0.0436
		0.0259
		0.0763
		0.0365
		0.0317
		0.0453
		0.0495
		0.0241
		0.0659
		0.0608
		0.0643
		0.0383
		0.0318
		0.0156
		0.0747
		0.0431
		0.0305
		0.0512
		0.0508
		0.024
		0.02882
		0.0262
		0.0553
		0.0868
		0.0424
		0.0326
		0.035
		0.0227
		0.0202
		0.026
		0.0314
		0.0302
		0.0313
		0.0751
		0.0568
		0.0496
		0.0231
		0.0756
		0.0519
		0.055
		0.0499
		0.05
		0.0457
		0.0809
		0.1029
		0.0316
		0.0409
		0.0486
		0.0128
		0.0778
		0.0593
		0.0324
		0.0477
		0.0254
		0.0725
		0.0804
		0.0714
		0.0367
		0.0301
		0.0439
		0.0418
		0.0334
		0.0404
		0.0788
		0.0737
		0.0583
		0.0331
		0.069
		0.0781
		0.0569
		0.0797
		0.0569
		0.0344
		0.0477
		0.0277
		0.0299
		0.0697
		0.0323
		0.0335
		0.0332
		0.0529
		0.0403
		0.0295
		0.0216
		0.0402
		0.0416
		0.0621
		0.0228
		0.0677
		0.0619
		0.0357
		0.0632
		0.0236
		0.0171
		0.0193
		0.0886
		0.0189
		0.0387
		0.0517
		0.0371
		0.0616
		0.0297
		0.1255
		0.0794
		0.0288
		0.0266
		0.0529
		0.0374
		0.0213
		0.0937
		0.0618
		0.0381
		0.0222
		0.0494
		0.023
		0.0381
		0.0233
		0.0377
		0.0334
		0.0904

## Sheet: Fig5D
Focal adhesion life time (min)	Control	VAPA KO	VAPA KO + Ch-VAPA	VAPA KO + Ch-VAPA KDMD
	16	21	17	34
	37	32	16	62
	23	48	21	62
	28	52	22	18
	38	27	16	23
	39	47	32	53
	40	41	27	38
	34	60	18	29
	29	44	19	23
	32	62	32	55
	30	37	18	47
	37	57	21	42
	7	49	12	54
	26	61	17	51
	40	54	14	40
	41	44	34	61
	43	50	23	27
	28	62	20	38
	40	53	25	35
	29	57	21	45
	50	10	42	18
	26	24	52	28
	32	58	38	58
	30	17	35	52
	55	22	14	34
	28	32	23	23
	44	21	43	37
	28	19	27	32
	22	44	33	15
	21	51	43	34
	55	36	22	44
	29	37	21	14
	46	33	22	10
	62	29	12	30
	29	23	41	19
	31	24	16	7
	30	50	15	18
	38	37	9	26
	28	41	17	13
	50	31	10	18
	42	41	18	49
	49	41	22	44
	32	19	24	26
	51	62	34	35
	61	51	28	33
	10	43	18	21
	50	48	28	47
	7	57	35	42
	20	43	13	51
	27	36	17	47
	40	56	24	25
	50	29	51	50
	48	27	26	49
	42	34	9	35
	33	21	43	56
	37	37	24	29
	51	40	22	33
	29	36	62	59
	45	30	32	20
	26	29	21	36
	38	29	11	50
	28	22	10	56
	26	19	24	18
	40	26	28	51
	39	49	20	26
	53	32	16	47
	45	36	10	29
	8	39	41	49
	51	21	25	27
	30	39	12	14
	37	62	57	53
	56	57	62	57
	41	62	62	27
	15	60	44	12
	50	45	60	28
	27	52	42	47
	37	52	47	45
	23	60	32	40
	33	62	57	24
	22	54		59
	28	62		51
	21	50		58
	47	25		22
	41	40		21
	29	37		55
	29	53		58
	53	58		60
	38	57		64
	8	39		61
	17	41		21
	23	26
	40	38
	27	48
	26	28
	3	45
	50	22
	24	25
	16	36
		42
		34
		52
		50
		57
		39
		49
		53
		55
		38
		39
		23
		36
		13
		53
		43
		50
		53
		45
		45
		33
		31

## Sheet: Fig5F
Focal adhesions area relative to t=0 (µm²)	Control T=0min	VAPA KO T=0min		Control T=15min	VAPA KO T=15min		Control T=30min	VAPA KO T=30min		Control T=60min	VAPA KO T=60min
	0.785941	4.66655		0.790915	1.39031		0.198972	5.10102		0.401924	0.698373
	15.1707	0.831933		1.20975	2.83694		0.626763	1.18756		0.963026	4.84194
	0.0557122	1.00572		0.0686454	0.81745		0.211905	0.259074		1.19682	0.971929
	0.086553	1.44663		0.988892	6.54604		0.0905324	2.43143		7.20976	0.447345
	0.280551	1.54479		0.086553	0.230109		0.401924	1.95673		0.0686454	0.292866
	0.129332	4.43		0.121373	0.104595		0.518323	3.08797		3.07114	0.279993
	0.743162	0.139996		1.42962	0.321831		0.50539	0.26551		0.777982	8.34185
	0.293484	1.22939		0.241751	0.154479		0.186039	0.139996		0.173106	0.146433
	0.0517328	7.63061		0.112419	0.111032		0.293484	1.94869		0.955067	0.432862
	1.93103	1.06204		0.440724	0.495619		0.116399	0.26551		0.0736198	0.175398
	1.17891	0.083676		1.05356	0.321831		0.0686454	4.21277		1.94396	0.146433
	0.151219	2.57143		0.155198	1.81673		0.151219	1.84409		0.544189	0.292866
	0.228818	1.88593		7.67635	0.307348		0.112419	0.259074		9.44721	0.196317
	0.350191	2.43787		0.440724	0.698373		0.164152	2.34132		0.436744	0.524584
	3.20047	0.217236		0.0736198	4.41552		0.50539	4.24173		1.84845	0.727338
	1.18389	0.370105		0.198972	0.999285		0.202952	0.405507		0.306417	2.05489
	0.0517328	0.154479		0.272592	5.96031		0.064666	0.217236		2.12502	0.238155
	0.760074	0.321831		0.103466	0.139996		2.61748	1.41123		1.03665	0.865725
	0.0606866	0.495619		0.173106	3.50796		1.55497	0.160915		0.0686454	0.880207
	0.462611	0.244591		3.37358	0.510102		0.794894	0.733774		1.46046	1.19399
	0.186039	0.691936		0.380037	1.31307		0.147239	1.15215		1.80567	0.286429
	0.0815787	3.04613		0.241751	0.873771		2.08224	1.43858		0.155198	0.558376
	5.0151	5.88307		0.0815787	1.16664		1.47737	1.36295		0.50141	0.823887
	0.0517328	4.79367		0.138286	1.9696		0.591943	1.78133		1.77583	4.82746
	0.168132	0.614697		0.142265	0.181834		0.855581	4.15001		0.103466	9.23654
	1.0844	2.59878		0.241751	4.35276		0.367104	0.516538		0.531256	0.558376
	0.164152	3.82818		0.064666	0.468264		0.717295	0.769176		1.65446	1.5995
	0.0686454	3.26336		11.1494	0.313785		0.811807	2.16592		0.444703	1.39675
	0.405903	0.859288		0.302438	0.370105		0.0905324	3.4098		0.160173	0.489183
	0.0736198	3.28428		0.173106	2.23511		1.25751	3.63347		1.1232	8.48185
	0.042779	2.99785		0.151219	0.802968		0.064666	0.20919		0.0994862	2.8997
	0.064666	3.61899		0.968	1.26479		0.665562	0.292866		2.37175	0.217236
	0.112419	0.405507		0.121373	2.15949		1.1232	0.146433		0.756095	0.334704
	0.129332	1.33399		0.570056	0.111032		0.61383	0.259074		0.0775992	0.706419
	0.0517328	0.154479		0.116399	0.167352		0.436744	4.08725		0.440724	0.901126
	3.10596	0.119077		0.85956	0.160915		0.164152	0.915609		0.0686454	0.671017
	0.276572	2.10316		0.0736198	0.279993		0.43177	0.181834		0.086553	0.154479
	0.0557122	2.43143		6.27658	0.251028		0.202952	0.963883		4.80319	0.217236
	0.042779	0.831933		1.46444	0.349186		2.99354	0.154479		0.324325	0.111032
	0.660588	0.26551		2.66921	0.154479		0.483503	0.139996		0.773007	0.188271
	0.337258	0.886644		1.21373	0.307348		0.103466	0.146433		0.699388	0.20919
	0.0477534	2.08868		0.151219	0.111032		0.0815787	1.36939		0.582989	1.35491
	0.924226	0.0981584		0.0815787	0.963883		1.73205	0.111032		0.125353	0.119077
	0.086553	0.119077		2.3628	0.125514		1.59874	0.202753		0.177085	0.838369
	0.177085	0.662971		0.475544	0.384588		0.181065	0.391024		1.01973	0.349186
	0.173106	3.39532		0.112419	1.13928		0.10844	0.188271		1.58581	0.391024
	0.186039	0.468264		0.306417	0.524584		2.08224	1.76041		0.121373	0.146433
	5.26978	0.865725		0.0736198	1.34847		0.483503	1.83122		2.00863	0.251028
	0.509369	0.334704		0.730228	2.17236		1.24457	0.111032		0.160173	1.56571
	0.202952	0.160915		0.600896	1.1248		0.151219	1.20847		0.263638	0.391024
	0.617809	0.0772394		0.816781	1.37583		0.0686454	1.37583		1.46046	0.104595
	0.0775992	0.0981584		1.26546	1.90685		0.492457	0.139996		3.47306	0.307348
	0.0477534	0.0981584		0.112419	0.727338		2.6523	0.154479		1.47737	2.95602
	0.190019	0.489183		2.37573	0.104595		2.91594	0.259074		0.254685	2.52154
	0.0606866	4.85643		0.125353	0.188271		0.237772	0.307348		3.0194	0.104595
	0.198972	0.691936		0.46659	0.131951		0.177085	0.217236		1.28337	0.662971
	0.0686454	0.391024		0.384017	0.600214		0.0736198	0.587341		0.147239	2.95602
	0.186039	1.20847		0.112419	1.73306		0.116399	2.02592		0.643675	2.77418
	7.07546	2.39603		0.211905	1.98409		1.29133	1.39675		0.202952	0.259074
	0.064666	0.0772394		0.125353	0.545503		0.263638	0.321831		1.46046	0.279993
	0.155198	2.05489		0.0955067	0.175398		0.142265	0.300912		1.20478	1.84409
	0.0905324	0.104595		0.10844	1.93581		4.74748	0.76113		0.0955067	4.22725
	0.302438	0.727338		0.10844	8.69909		0.10844	0.984802		0.125353	0.907563
	0.129332	0.89469		0.276572	3.68174		0.259659	0.531021		2.34588	0.928482
	0.173106	0.104595		1.93103	0.125514		0.219864	1.55122		0.112419	0.111032
	0.0905324	0.244591		0.121373	0.139996		16.4451	0.355623		0.134306	0.104595
	0.042779	1.87305		0.39297	0.251028		0.418837	1.48847		0.384017	0.139996
	0.0736198	1.13928		0.263638	1.1248		0.215885	1.82317		0.138286	0.175398
	0.350191	0.642053		0.721275	1.87305		1.73603	0.167352		0.138286	0.238155
	0.608855	0.119077		0.0686454	1.7395		0.850607	0.167352		0.168132	0.160915
	4.77733	0.139996		0.868514	0.712855		0.0905324	1.04112		3.46908	3.65439
	0.134306	0.217236		3.23529	0.175398		0.0736198	0.915609		0.328304	0.223672
	0.293484	1.95673		0.678496	2.145		0.190019	2.20776		0.228818	2.02592
	4.56144	4.72287		0.0815787	0.782049		0.125353	1.03469		0.112419	0.391024
	0.250705	0.111032		0.202952	0.55194		0.376058	3.18613		3.05821	0.202753
	0.042779	5.90399		1.51219	4.80011		0.0955067	0.181834		1.29631	1.48203
	0.984913	0.942964		0.0686454	3.06061		0.138286	0.196317		0.147239	0.328267
	0.190019	0.160915		0.324325	0.775612		0.160173	0.167352		0.0994862	3.57715
	0.219864	0.119077		1.62461	1.11032		0.173106	1.37583		2.47124	1.09744
	0.93716	2.37511		0.298459	0.662971		0.086553	1.74754		1.22666	0.111032
	0.0686454	0.125514		4.11276	0.691936		0.177085	0.259074		0.198972	0.251028
	5.227	0.363669		0.112419	7.769		0.151219	11.4942		0.160173	0.175398
	0.138286	1.27123		0.311392	0.292866		0.190019	1.1602		0.112419	0.397461
	0.86354	2.69694		0.164152	0.167352		0.112419	0.111032		0.306417	0.139996
	0.0905324	10.5577		0.086553	0.154479		0.168132	6.14858		0.160173	0.468264
	0.134306	0.167352		0.232798	0.593778		3.79739	0.119077		0.341238	0.238155
	0.086553	3.33256		0.064666	0.238155		0.0686454	0.181834		0.206931	0.131951
	0.276572	0.196317		0.112419	0.131951		0.306417	0.230109		0.064666	1.41123
	6.93717	0.363669		2.20262	1.18112		0.064666	2.58591		2.74283	1.75398
	0.237772	0.230109		0.0815787	0.384588		0.125353	0.111032		0.54021	0.279993
	0.042779	1.67674		0.10844	1.71858		0.311392	3.40336		0.177085	0.251028
	0.0606866	4.52816		0.245731	0.447345		0.0815787	1.90685		0.298459	1.15215
	1.3739	3.66082		1.08042	0.886644		0.0955067	0.328267		0.0994862	3.89254
	0.0557122	0.0901126		0.371083	2.38316		2.63041	2.2496		1.04958	0.915609
	0.376058	0.510102		0.224839	0.328267		0.116399	0.160915		0.0955067	0.635616
	7.2227	0.154479		0.190019	0.286429		0.0775992	0.328267		1.4127	0.292866
	0.0815787	0.083676		0.224839	1.6349		0.186039	0.279993		0.259659	1.80225
	0.103466	3.43715		0.0775992	0.160915		0.0775992	3.47899		0.781961	0.823887
	0.0994862	0.181834		4.25104	0.376542		1.85343	0.26551		0.924226	1.25836
	0.042779	2.45879		0.142265	0.125514		0.916268	0.873771		0.142265	0.167352
	0.436744	0.447345		4.06898	2.06133		0.125353	0.188271		0.254685	0.307348
	0.0815787	0.146433		0.0736198	0.26551		0.0736198	0.188271		4.95939	7.47613
	0.116399	1.23744		0.116399	3.91346		2.38468	0.419989		0.876473	0.984802
	0.0477534	0.202753		0.427791	0.217236		1.68928	0.279993		0.0686454	1.04112
	0.202952	0.083676		0.781961	0.286429		4.02123	0.271947		5.0539	0.146433
	0.173106	4.09369		0.47057	0.104595		0.125353	0.775612		0.634722	1.35491
	5.0539	0.0691936		7.72809	0.740211		0.566076	0.259074		2.00465	0.453781
	0.0815787	0.111032		0.228818	0.223672		7.94795	2.60683		0.125353	0.489183
	0.453657	0.279993		0.263638	1.18112		1.30028	0.489183		4.94645	0.251028
	0.134306	0.60826		0.177085	1.0202		0.151219	0.802968		0.103466	0.328267
	0.064666	0.0901126		0.147239	0.139996		0.228818	5.78491		0.440724	0.286429
	0.0736198	3.29716		0.647655	0.111032		2.37175	0.286429		0.509369	0.139996
	0.350191	0.125514		0.215885	1.14572		0.388991	0.558376		2.84232	0.104595
	2.92887	0.489183		0.193998	0.621133		0.85956	0.119077		0.916268	2.17236
	0.116399	0.083676		0.293484	0.677454		0.129332	0.251028		0.267618	2.94153
	0.112419	0.104595		0.0905324	0.370105		0.168132	1.99052		0.289505	1.44663
	1.77085	0.0901126		0.064666	0.880207		0.86354	2.00501		1.93998	2.38959
	1.00183	1.37583		0.0815787	0.531021		0.0736198	0.104595		3.6591	0.160915
	0.0517328	0.391024		0.138286	0.397461		0.112419	3.22153		0.155198	0.20919
	0.112419	0.447345		0.086553	2.02592		0.298459	3.46612		0.514343	0.104595
	0.121373	0.0981584		0.743162	3.8491		0.219864	5.5194		0.241751	0.167352
	0.496436	0.405507		0.35815	0.119077		0.285525	3.27624		0.324325	0.238155
	0.173106	0.139996		1.61963	0.154479		0.064666	1.92777		0.173106	3.77347
	0.125353	4.56195		0.276572	0.321831		0.315371	0.131951		0.324325	1.17307
	0.0557122	0.131951		0.254685	0.146433		2.30211	0.503665		2.12105	0.482746
	14.8294	0.440908		0.371083	2.92705		0.0994862	0.154479		0.61383	3.31808
	0.82474	0.083676		0.112419	4.29644		0.380037	0.432862		0.232798	1.69122
	0.042779	0.244591		0.553143	0.104595		0.173106	1.40479		0.160173	0.125514
	0.0905324	0.244591		0.604876	0.104595		0.276572	3.01877		0.116399	0.104595
	2.2852	0.104595		0.354171	2.91418		0.177085	2.80797		0.086553	1.11836
	0.206931	0.125514		0.103466	9.05471		0.418837	0.34275		0.0775992	0.111032
	0.315371	0.104595		0.259659	0.26551		1.85741	0.20919		0.405903	2.2142
	1.13215	6.29501		0.116399	0.292866		1.54601	7.31521		0.116399	3.87001
	0.190019	0.0772394		1.61168	0.139996		0.384017	1.10388		0.785941	1.54479
	0.548169	0.104595		0.168132	3.34704		2.50108	0.432862		0.302438	2.55051
	0.134306	0.154479		0.181065	0.175398		0.160173	0.20919		0.129332	0.901126
	0.0557122	0.286429		0.427791	0.524584		0.186039	0.119077		0.116399	2.70338
	0.064666	0.259074		0.272592	0.104595		0.168132	1.27123		0.125353	5.02378
	0.121373	0.0691936		0.241751	0.196317		0.121373	0.125514		0.743162	0.202753
	0.125353	3.24245		4.05605	0.349186		0.0686454	0.111032		0.604876	1.38387
	0.168132	2.71143		0.177085	0.468264		0.0686454	0.34275		0.112419	0.146433
	0.566076	0.104595		0.147239	0.244591		0.116399	0.355623		0.405903	0.461827
	0.881447	3.11693		0.0736198	0.119077		0.405903	1.51582		1.47339	0.271947
	0.276572	0.223672		0.155198	0.217236		2.74781	0.188271		0.82474	0.363669
	0.206931	5.5194		0.267618	0.572859		1.30924	7.40694		0.0775992	0.769176
	0.164152	0.307348		1.28735	0.936528		0.50141	22.9449		0.889406	4.07277
	0.0517328	5.59664		4.16847	0.154479		0.086553	0.104595		0.43177	0.286429
	0.337258	5.75755		2.47919	0.873771		0.401924	2.01949		0.116399	0.181834
	3.07611	0.0691936		0.837673	1.43858		0.064666	0.111032		0.272592	0.26551
	0.168132	1.73306		0.285525	0.181834		0.311392	7.86072		0.138286	1.78133
	0.0686454	0.376542		0.781961	0.154479		0.0775992	0.160915		1.55099	0.662971
	0.0606866	3.75255		4.64401	0.111032		0.376058	0.139996		5.4986	0.55194
	1.41668	0.376542		0.479523	0.217236		0.112419	0.217236		1.11922	0.160915
	0.414857	2.13052		0.177085	1.81673		0.228818	0.244591		2.44537	0.259074
	10.7385	1.06848		3.39546	0.334704		0.272592	0.139996		1.91411	4.20633
	1.49926	2.70338		0.367104	0.769176		0.0775992	2.83694		0.224839	5.42124
	3.11491	0.397461		1.2008	3.16521		0.579009	0.154479		1.53806	0.131951
	3.10596	1.1248		0.492457	0.119077		0.219864	0.217236		1.21373	0.901126
	1.33013	0.0772394		1.74499	0.202753		0.0955067	0.384588		0.129332	2.38959
	0.042779	0.160915		0.280551	2.58591		0.816781	2.34776		0.695408	0.154479
	0.760074	3.07348		0.202952	0.279993		1.30924	0.111032		0.902339	4.79367
	0.634722	1.50295		2.92887	0.104595		0.566076	0.363669		0.181065	0.167352
	0.332284	0.188271		0.0736198	0.111032		0.409883	1.39031		0.121373	0.238155
	1.56392	0.0901126		0.112419	1.88593		0.206931	6.19685		1.13613	0.154479
	4.98028	6.19685		0.103466	0.34275		0.116399	0.139996		0.639696	3.49991
	0.0557122	0.0901126		0.202952	0.202753		0.129332	1.26479		1.42962	13.0663
	0.0517328	0.677454		0.0815787	0.238155		0.164152	0.202753		2.64335	5.31665
	0.250705	5.47756		0.112419	0.104595		5.15338	0.154479		0.0815787	0.196317
	0.0994862	0.593778		0.10844	0.238155		0.449678	0.733774		0.0736198	1.66226
	0.112419	1.28571		9.58947	0.313785		0.164152	0.754693		0.224839	4.30449
	0.409883	0.146433		9.48601	0.125514		0.173106	0.160915		0.215885	0.292866
	1.74499	0.083676		0.363125	0.139996		1.53308	0.119077		0.354171	0.131951
	1.93998	0.0691936		0.0775992	0.154479		0.298459	0.196317		0.193998	0.104595
	0.0557122	0.154479		0.151219	2.16592		0.086553	0.397461		0.138286	6.14214
	1.44255	0.139996		1.4903	0.363669		0.0815787	13.9884		0.112419	0.355623
	0.190019	0.119077		1.94794	0.111032		0.064666	0.223672		0.436744	5.60307
	1.17095	0.355623		9.57654	0.154479		0.0905324	0.139996		0.449678	2.50062
	0.328304	0.217236		1.39082	0.26551		0.0736198	0.175398		0.0815787	0.111032
	0.0557122	0.251028		0.285525	1.04756		0.790915	0.363669		0.276572	0.146433
	0.280551	0.691936		0.833694	0.313785		0.193998	0.334704		0.496436	2.94153
	1.6455	0.307348		0.984913	0.125514		0.328304	0.223672		0.142265	0.131951
	4.81613	0.0691936		0.10844	0.34275		1.60272	0.461827		1.0844	0.104595
	0.173106	0.0691936		0.0815787	0.34275		0.0775992	0.391024		1.39977	4.23368
	0.241751	0.823887		10.5535	4.61827		0.354171	0.391024		0.0905324	0.334704
	2.12105	2.06776		0.765049	0.104595		0.0815787	0.202753		0.920247	5.65296
	2.55281	3.13785		0.0775992	0.244591		0.129332	6.62328		0.190019	0.196317
	0.427791	0.474701		0.626763	7.44073		3.79241	0.579295		0.206931	0.719292
	2.15984	0.447345		0.103466	0.719292		0.064666	0.251028		3.64119	0.313785
	0.0557122	2.06133		0.086553	4.07277		2.12105	0.111032		0.211905	0.447345
	0.215885	0.20919		0.488477	2.7597		0.384017	0.119077		0.617809	0.238155
	0.363125	0.139996		0.345217	0.503665		0.0815787	0.146433		3.92672	0.355623
	0.042779	1.85214		1.1232	0.432862		3.53773	0.397461		0.134306	0.978366
	0.121373	0.971929		0.116399	0.175398		1.36893	0.271947		0.0955067	0.104595
	0.232798	0.251028		0.147239	10.2213		0.168132	0.259074		0.160173	1.17307
	0.125353	0.286429		0.103466	1.64938		0.298459	0.181834		4.57437	0.642053
	1.79672	0.160915		0.064666	0.167352		0.0686454	0.286429		3.90981	0.712855
	0.363125	4.4654		0.0686454	1.57214		0.0736198	0.20919		0.660588	0.20919
	0.042779	0.0772394		2.76472	3.75255		0.190019	0.244591		0.134306	0.677454
	3.15371	0.188271		0.086553	1.24388		0.0775992	0.461827		0.0815787	0.614697
	0.306417	0.251028		0.0736198	3.20704		0.181065	0.432862		3.97845	1.04112
	1.23064	1.18756		0.202952	2.26408		0.134306	0.139996		0.125353	1.85857
	0.0994862	2.63418		0.798874	0.160915		0.193998	0.181834		2.12105	0.175398
	0.121373	0.119077		0.0736198	0.111032		0.112419	0.131951		1.95291	0.307348
	0.0736198	0.391024		0.0736198	0.363669		0.0994862	0.901126		3.63323	0.370105
	1.75792	0.0901126		0.444703	0.119077		0.285525	0.202753		0.103466	0.146433
	0.232798	0.928482		0.0994862	1.21652		0.121373	0.419989		2.2852	0.111032
	4.34954	0.0981584		0.566076	0.139996		0.0994862	0.119077		6.63971	0.537458
	0.0955067	0.083676		33.8323	0.139996		0.181065	0.614697		0.492457	1.57214
	0.414857	0.748257		0.168132	0.474701		2.25535	0.160915		0.738187	0.6855
	0.0557122	0.111032		0.0775992	0.579295		3.08407	0.111032		1.75394	0.238155
	0.042779	2.69051		0.224839	0.196317		0.134306	0.196317		1.20478	0.111032
	8.0345	6.18398		0.0686454	0.125514		0.337258	0.125514		1.49428	0.167352
	0.0517328	5.59664		6.40193	3.39532		0.0736198	1.78133		2.71697	0.230109
	0.0606866	0.202753		0.328304	0.146433		1.14907	0.432862		2.19467	1.64134
	3.90981	1.47399		0.0815787	0.286429		0.0775992	0.852852		1.61566	2.32684
	0.846627	1.11032		0.708341	1.66226		0.660588	0.175398		0.984913	0.167352
	0.138286	0.0691936		0.112419	0.999285		0.086553	0.432862		0.0736198	1.32755
	0.042779	1.86501		0.0905324	0.321831		3.62428	0.202753		0.254685	1.59306
	0.232798	0.0772394		0.785941	0.188271		0.0686454	0.531021		0.829715	5.9941
	0.315371	1.32755		0.147239	0.146433		0.168132	0.489183		0.0905324	3.22796
	0.0477534	0.230109		0.298459	0.572859		0.064666	0.202753		0.0905324	0.154479
	0.479523	0.384588		0.086553	0.20919		0.0905324	0.600214		0.134306	1.0556
	5.08872	0.175398		0.211905	0.370105		3.90483	0.579295		0.237772	0.727338
	0.142265	0.083676		0.064666	1.11032		0.125353	0.181834		0.151219	2.09673
	0.0905324	1.39031		0.064666	0.474701		0.367104	0.411943		0.855581	1.28571
	3.16167	0.671017		0.436744	0.489183		1.27044	1.97765		0.129332	0.328267
	0.579009	0.754693		0.0736198	0.160915		0.54021	0.111032		0.134306	2.47971
	0.064666	1.00572		0.103466	0.384588		0.064666	0.26551		0.0955067	0.202753
	0.142265	0.20919		0.682475	0.160915		3.20942	0.600214		0.0955067	0.482746
	0.881447	0.482746		0.0686454	1.11032		0.086553	0.223672		0.147239	1.33399
	0.306417	0.545503		0.298459	0.175398		0.483503	0.614697		0.345217	0.20919
	0.042779	0.363669		0.341238	0.104595		1.03665	0.321831		0.717295	0.880207
	0.315371	1.03469		0.0994862	0.131951		0.0736198	0.802968		0.0686454	0.131951
	0.0815787	0.0772394		0.0905324	0.181834		1.21373	0.859288		2.38468	1.75398
	4.17742	0.307348		0.232798	0.104595		0.064666	1.81673		0.0686454	1.19399
	1.07147	0.321831		0.0955067	0.844806		0.064666	0.566422		0.376058	0.244591
	0.968	0.754693		4.98028	0.175398		0.929201	0.300912		0.479523	2.43787
	0.82474	4.17897		0.475544	0.405507		0.190019	1.55766		3.32582	0.196317
	0.064666	0.111032		0.93716	0.104595		0.10844	0.712855		0.449678	4.73091
	0.608855	0.139996		0.0736198	0.510102		1.91809	2.05489		0.064666	0.426426
	0.807828	0.175398		0.181065	2.23511		0.121373	2.75326		0.0955067	0.196317
	0.263638	0.0772394		0.272592	5.484		2.29813	1.85214		2.15984	0.279993
	0.405903	1.37583		0.177085	0.119077		0.916268	1.14572		1.62461	1.7395
	0.0477534	0.286429		0.0815787	0.119077		0.173106	0.223672		0.388991	0.334704
	0.121373	5.57572		0.134306	0.160915		1.99967	0.307348		0.61383	0.202753
	1.58083	1.06848		0.064666	5.59664		0.0686454	0.727338		0.401924	0.181834
	0.717295	2.10316		1.3739	0.175398		0.660588	0.26551		4.09983	0.629179
	0.574035	0.146433		0.289505	2.02592		0.608855	2.62775		0.276572	1.04112
	0.198972	1.52387		0.103466	0.217236		0.47057	0.131951		0.82474	0.796531
	2.07827	4.01806		0.064666	1.38387		0.0994862	2.13857		1.52015	0.160915
	0.582989	0.083676		0.0736198	0.748257		1.33013	3.01073		1.6455	0.139996
	0.215885	0.886644		0.129332	0.60826		0.0815787	0.698373		0.0994862	1.25031
	0.315371	0.251028		0.086553	0.167352		0.224839	0.922045		0.0815787	0.111032
	0.811807	0.223672		0.0905324	0.796531		0.354171	0.587341		0.634722	0.363669
	0.409883	0.0772394		2.13796	0.146433		6.51833	3.04613		0.086553	0.600214
	0.267618	24.3851		7.0277	4.12909		0.112419	2.94797		0.39297	0.321831
	0.760074	1.54479		9.65911	3.70266		0.164152	2.55051		0.206931	0.125514
	0.449678	0.321831		0.0905324	2.66959		3.71481	1.66226		0.215885	0.566422
	2.81247	0.111032		0.064666	3.41623		0.064666	0.587341		0.142265	0.111032
	1.22269	0.111032		0.259659	0.292866		0.894381	5.39388		2.02554	0.300912
	0.708341	3.46612		0.0815787	0.146433		1.04958	0.880207		0.440724	4.96102
	0.582989	0.271947		0.0955067	1.56571		0.0736198	0.880207		0.0994862	0.181834
	0.0686454	0.915609		0.142265	0.131951		0.665562	2.78706		0.881447	0.89469
	0.254685	0.223672		0.328304	4.36724		1.1232	6.28053		0.363125	0.20919
	0.116399	0.217236		0.46659	0.167352		0.0815787	0.217236		0.177085	1.37583
	2.94181	0.370105		0.0775992	0.957447		0.064666	3.60451		0.129332	0.698373
	1.01973	2.91418		0.0686454	3.45807		0.0994862	0.26551		0.0686454	1.0556
	0.289505	0.363669		0.155198	0.238155		0.241751	0.238155		0.509369	0.104595
	0.232798	0.321831		0.0955067	0.196317		0.129332	1.41766		0.211905	6.43501
	1.92705	0.104595		4.24607	0.125514		2.76074	0.733774		1.36097	0.963883
	0.752115	0.083676		0.0686454	0.230109		0.142265	2.55051		0.064666	0.167352
	0.160173	11.7726		0.164152	0.119077		1.96585	0.188271		0.319351	0.405507
	0.43177	0.160915		1.72808	0.119077		0.064666	1.39031		0.202952	0.175398
	0.509369	0.782049		0.134306	3.73163		0.781961	0.271947		0.0686454	0.474701
	0.483503	0.238155		0.064666	0.119077		0.112419	0.286429		0.138286	1.00572
	0.483503	0.160915		0.285525	0.376542		1.43857	1.34203		0.142265	0.154479
	0.319351	0.349186		1.73603	1.17307		0.777982	0.223672		0.125353	0.160915
	0.324325	0.083676		0.112419	5.19757		0.0775992	0.503665		3.64617	1.64938
	0.0736198	0.461827		0.10844	2.75326		0.0905324	1.84409		0.112419	0.196317
	0.790915	2.38959		3.90981	3.29072		0.116399	1.81673		0.190019	0.20919
	0.0955067	0.461827		0.181065	0.614697		0.272592	0.196317		0.219864	0.334704
	0.250705	0.104595		0.367104	3.38244		0.0955067	0.244591		0.064666	0.139996
	0.39297	0.244591		0.876473	0.154479		0.0994862	0.482746		0.363125	0.321831
	0.518323	0.104595		8.9637	0.119077		0.112419	0.26551		0.0686454	0.391024
	0.186039	0.907563		7.42963	0.754693		0.219864	0.154479		0.086553	0.125514
	0.0775992	0.131951		0.647655	0.125514		0.198972	0.111032		1.12718	1.85214
	1.28735	0.0981584		0.0955067	0.328267		0.0905324	0.6855		0.747141	0.223672
	0.341238	0.0691936		0.712321	3.04613		0.350191	0.196317		0.206931	0.838369
	3.097	2.425		0.116399	0.370105		0.47057	0.489183		0.579009	0.104595
	0.042779	5.59664		0.0905324	0.154479		0.138286	2.285		0.647655	0.907563
	1.79274	0.125514		1.89621	0.271947		0.267618	1.93581		0.868514	0.146433
	0.042779	0.677454		0.103466	0.238155		0.064666	8.53173		0.332284	1.38387
	0.350191	0.181834		0.186039	2.76614		0.259659	0.727338		0.570056	0.852852
	0.042779	0.286429		0.0775992	0.154479		0.164152	0.587341		2.14691	0.154479
	0.963026	1.42571		1.17095	0.642053		0.39695	2.00501		0.367104	7.95083
	11.9652	1.93581		8.66127	0.154479		0.064666	1.92133		0.125353	0.852852
	0.10844	0.196317		0.276572	0.131951		0.151219	0.160915		3.38253	0.146433
	1.84049	0.188271		0.155198	0.432862		6.89439	1.84409		0.409883	0.104595
	0.0994862	0.831933		0.0955067	2.86429		0.181065	0.160915		2.25933	0.188271
	1.25751	0.131951		1.28735	0.957447		0.0736198	2.55695		0.064666	0.635616
	0.116399	1.46755		0.064666	0.802968		0.103466	0.313785		1.10629	0.328267
	0.142265	0.119077		0.449678	0.957447		0.85956	0.104595		0.453657	0.160915
	0.842648	3.57715		0.10844	1.19399		0.0905324	0.558376		0.129332	0.370105
	2.08623	4.43		3.60239	0.217236		0.064666	0.300912		2.78163	1.11836
	0.116399	0.125514		0.151219	0.698373		0.0736198	0.238155		0.384017	0.146433
	0.0955067	9.63561		1.73603	0.160915		0.384017	0.432862		0.794894	2.49419
	2.75577	0.083676		0.509369	0.160915		0.0905324	2.91418		0.527277	0.202753
	0.0775992	0.139996		0.121373	6.17593		0.086553	0.474701		0.064666	0.259074
	0.10844	8.6846		0.168132	1.55766		0.134306	0.119077		0.514343	0.579295
	0.151219	1.69766		0.0775992	0.796531		0.0736198	0.111032		0.440724	0.516538
	4.40226	5.61112		0.272592	0.202753		0.224839	0.790095		0.975959	0.125514
	3.00647	0.0981584		0.232798	0.111032		0.116399	0.286429		0.0686454	0.111032
	0.0477534	0.26551		0.147239	0.146433		0.0955067	0.131951		2.26331	0.244591
	1.51219	12.7171		0.0736198	0.119077		0.0994862	1.18756		0.0686454	0.355623
	0.10844	0.181834		1.75792	2.01949		2.60952	0.154479		0.561102	0.104595
	0.647655	0.0691936		0.125353	0.111032		0.228818	0.482746		0.743162	0.34275
	0.129332	0.838369		0.064666	0.495619		0.103466	0.20919		0.0775992	0.537458
	0.125353	0.125514		3.35169	3.63991		0.0815787	0.831933		0.794894	0.405507
	0.0477534	5.74951		0.574035	5.29573		0.134306	1.13928		0.164152	0.104595
	0.0517328	0.271947		0.267618	0.175398		0.164152	0.440908		0.43177	11.7516
	1.86139	0.0772394		0.0815787	1.65582		0.0905324	0.104595		1.62859	0.461827
	0.164152	0.426426		0.086553	0.217236		0.164152	1.29215		1.09335	1.90685
	6.16814	0.125514		0.777982	0.754693		0.215885	0.188271		0.232798	0.202753
	0.0517328	4.45092		1.26148	0.139996		0.064666	0.131951		1.20478	0.355623
	0.0517328	0.196317		0.0905324	0.432862		0.10844	0.217236		1.79672	0.60826
	1.42166	4.12265		0.475544	2.63418		0.643675	0.426426		0.82474	0.313785
	0.042779	0.0772394		2.13796	0.748257		0.112419	2.29948		0.293484	0.119077
	0.121373	0.154479		3.12785	0.139996		0.164152	0.259074		0.177085	0.202753
	1.06649	0.244591		0.302438	0.139996		0.250705	0.411943		0.267618	1.20847
	0.0686454	0.181834		0.0736198	0.349186		2.74283	0.593778		2.01261	0.355623
	0.557122	4.26265		0.0994862	0.662971		0.626763	0.662971		0.462611	0.251028
	0.0736198	1.14572		0.064666	4.52816		0.0905324	3.66082		0.103466	0.139996
	1.47339	6.72787		0.0815787	0.300912		2.37175	0.831933		0.177085	0.20919
	0.0606866	0.244591		0.064666	5.11389		0.064666	0.279993		0.876473	0.119077
	0.0557122	0.26551		0.0686454	0.748257		0.254685	0.873771		0.600896	1.39031
	0.232798	0.160915		7.27045	0.125514		0.50539	0.139996		0.665562	0.111032
	0.147239	0.706419		0.0686454	0.160915		1.51219	0.111032		0.086553	0.111032
	0.10844	0.181834		0.112419	0.432862		0.202952	0.384588		0.765049	0.300912
	0.401924	11.6471		0.177085	0.259074		0.0815787	0.160915		0.164152	0.238155
	0.0517328	2.34132		0.193998	4.70195		0.267618	0.844806		0.267618	1.51582
	0.10844	5.58216		0.142265	0.6855		0.193998	0.139996		0.232798	0.167352
	0.103466	1.57858		0.514343	0.292866		0.160173	0.104595		0.0905324	0.230109
	0.634722	0.823887		0.10844	0.662971		0.164152	0.244591		0.121373	0.175398
	0.453657	1.42571		0.134306	0.146433		0.0815787	0.957447		0.125353	0.251028
	0.064666	0.259074		0.121373	3.2344		1.96983	0.426426		0.272592	0.307348
	0.042779	0.0691936		0.350191	0.104595		0.245731	4.89022		0.280551	0.468264
	0.388991	5.40837		0.186039	5.06562		0.0815787	1.06204		0.306417	5.5194
	1.92207	0.0772394		0.103466	0.405507		0.168132	0.292866		0.155198	0.202753
	0.112419	4.47184		0.0815787	1.89397		3.03632	1.57214		0.138286	4.21277
	5.28769	2.08868		0.86354	0.886644		2.36678	0.915609		0.0955067	0.489183
	8.53193	0.119077		0.0955067	1.06204		0.0815787	0.196317		0.064666	1.43215
	0.0905324	0.083676		0.164152	0.271947		2.13796	0.349186		0.116399	8.34185
	0.206931	4.30449		0.0815787	0.125514		0.0994862	2.285		0.160173	1.23744
	0.0606866	0.440908		0.0994862	0.154479		0.0686454	0.111032		0.302438	0.859288
	0.354171	0.0901126		0.193998	0.202753		1.89621	0.104595		0.064666	0.119077
	0.142265	3.13785		0.0736198	0.154479		2.2076	0.104595		0.0994862	2.08224
	0.0994862	0.139996		0.0736198	0.572859		3.03632	0.119077		0.600896	0.104595
	4.29382	12.1861		0.0994862	0.223672		1.55497	0.230109		0.164152	0.76113
	1.55895	16.629		0.160173	6.0649		0.064666	0.181834		0.0994862	0.907563
	0.280551	0.146433		2.60952	3.2344		0.116399	0.131951		0.086553	0.271947
	0.147239	11.4379		0.10844	3.43715		0.0686454	0.104595		0.0955067	0.139996
	0.0994862	1.62846		0.0736198	0.131951		0.164152	5.5194		0.682475	0.146433
	5.04096	1.45307		0.064666	0.111032		0.10844	12.4726		0.0736198	0.160915
	0.064666	0.271947		0.064666	0.796531		0.647655	0.26551		0.0686454	0.300912
	0.388991	0.0901126		0.0815787	0.217236		4.8599	0.901126		0.354171	0.104595
	0.168132	0.083676		0.125353	1.18112		0.121373	0.104595		0.086553	0.160915
	7.551	0.104595		1.0068	2.7243		1.33013	0.111032		0.553143	0.355623
	4.31969	2.80797		0.518323	0.111032		0.129332	2.425		0.384017	1.66226
	2.06931	0.405507		0.103466	2.23511		0.0775992	0.363669		1.14011	2.90613
	0.427791	0.104595		0.570056	0.292866		0.103466	0.202753		0.0994862	0.223672
	0.0557122	1.18756		0.10844	0.181834		0.319351	2.94153		0.241751	0.307348
	0.306417	0.978366		0.186039	0.139996		0.086553	0.852852		1.03665	0.202753
	0.0905324	0.0691936		0.267618	0.104595		3.92672	0.160915		0.134306	0.223672
	0.0686454	0.313785		0.272592	0.167352		0.219864	0.119077		0.0955067	0.125514
	1.79274	0.0901126		0.112419	0.125514		0.712321	0.230109		0.103466	1.99857
	0.042779	1.36939		0.785941	0.217236		1.09335	0.175398		0.263638	1.95673
	0.219864	0.936528		0.0994862	2.20132		0.881447	0.104595		0.0736198	0.300912
	0.250705	0.154479		0.202952	0.230109		0.134306	0.244591		1.30028	1.41766
	0.0994862	0.0981584		0.0775992	0.558376		0.46659	0.111032		0.160173	0.111032
	0.0477534	1.70409		0.561102	1.34847		0.0815787	0.468264		0.82474	0.405507
	0.219864	0.167352		0.341238	3.16521		0.350191	0.196317		0.134306	1.66226
	1.33013	2.425		0.803848	0.321831		0.427791	0.942964		1.20478	0.167352
	0.0477534	0.334704		0.0736198	0.992848		0.116399	0.928482		0.600896	1.75398
	1.68032	1.72501		0.634722	0.160915		0.086553	0.154479		0.0955067	0.111032
	0.0994862	0.0691936		0.215885	0.111032		0.39695	0.217236		0.0686454	0.286429
	0.064666	0.34275		0.181065	0.20919		0.10844	0.230109		0.116399	0.656535
	0.042779	0.160915		0.0736198	5.5548		0.0736198	0.286429		0.103466	0.104595
	0.042779	0.104595		0.462611	1.6349		0.289505	0.238155		0.168132	1.67674
	0.0557122	0.313785		0.872494	1.08296		0.924226	0.131951		1.67634	0.251028
	0.0557122	0.453781		0.444703	0.167352		1.33908	0.419989		0.656609	0.419989
	0.929201	0.083676		0.0736198	0.957447		0.129332	0.468264		0.228818	0.20919
	4.2978	1.09744		0.0905324	0.355623		0.514343	0.104595		0.202952	0.300912
	0.064666	0.873771		0.816781	0.461827		1.93998	0.279993		0.401924	0.154479
	0.151219	0.125514		0.984913	1.58663		1.58581	0.154479		0.164152	0.146433
	0.0686454	2.50867		0.492457	0.111032		0.975959	0.328267		0.147239	0.426426
	0.0517328	0.160915		0.414857	0.244591		0.345217	0.34275		0.0686454	3.99714
	8.6742	0.0691936		4.44902	1.41123		0.160173	0.244591		0.0815787	0.223672
	0.064666	0.901126		0.168132	0.719292		0.211905	0.20919		0.790915	1.04756
	0.177085	0.0981584		0.112419	0.733774		0.0994862	0.313785		0.138286	0.566422
	0.173106	0.119077		0.371083	0.405507		0.785941	0.34275		0.0775992	2.43787
	0.293484	0.0772394		0.46659	0.55194		1.87929	0.154479		0.479523	0.146433
	0.518323	1.68318		0.160173	0.230109		1.77085	0.188271		0.112419	2.6197
	0.173106	0.0691936		0.35815	2.1096		0.993867	0.259074		1.90516	0.188271
	0.134306	12.8217		1.22666	0.642053		0.155198	1.01377		0.064666	2.73234
	0.678496	0.167352		0.0736198	1.26479		0.103466	0.635616		0.479523	0.334704
	0.103466	0.167352		0.164152	0.873771		0.380037	0.125514		0.0736198	1.00572
	0.0517328	1.0894		2.20262	0.461827		1.93103	0.131951		0.0686454	0.328267
	0.0775992	5.89755		1.96585	1.39031		0.250705	0.656535		0.160173	0.20919
	7.13614	0.196317		0.173106	0.131951		0.232798	0.733774		0.0736198	7.81888
	3.72775	1.16664		0.61383	0.244591		1.00183	0.20919		0.116399	0.111032
	0.160173	9.03379		0.267618	0.662971		0.337258	0.579295		0.414857	1.84409
	0.911293	0.566422		0.289505	2.06776		0.483503	0.20919		1.84447	0.432862
	0.0736198	0.0772394		0.232798	0.238155		0.475544	0.139996		0.760074	1.65582
	1.03267	0.111032		1.79274	0.748257		0.259659	0.474701		0.121373	9.4039
	0.765049	0.111032		0.367104	0.125514		0.0994862	0.196317		0.129332	0.510102
	1.14509	0.0772394		0.82474	0.579295		1.37788	0.572859		0.232798	2.01949
	1.43459	0.083676		0.0775992	0.307348		0.302438	0.259074		1.21373	0.139996
	4.57935	0.196317		0.444703	0.712855		0.0686454	0.419989		1.71514	1.48203
	2.41453	0.175398		0.064666	1.61398		0.0815787	0.139996		2.4016	0.440908
	0.0905324	0.104595		3.31289	0.259074		0.064666	0.131951		1.38684	0.125514
	0.0477534	3.71715		0.219864	0.313785		7.2227	0.139996		0.116399	0.662971
	0.250705	0.0772394		0.0686454	2.6197		0.39695	0.104595		0.129332	0.419989
	0.0815787	0.0691936		0.211905	0.175398		0.0994862	1.17307		0.371083	0.55194
	0.0736198	0.355623		0.237772	1.17307		0.064666	7.23797		4.02123	0.733774
	0.0736198	0.119077		0.064666	0.104595		0.608855	0.139996		0.0815787	9.60021
	0.181065	0.0691936		0.544189	0.196317		0.142265	0.160915		0.224839	0.271947
	0.0477534	0.489183		0.267618	6.58144		0.0905324	0.461827		1.18389	0.217236
	0.311392	0.146433		0.168132	0.146433		1.57288	0.307348		0.134306	2.86429
	0.215885	12.207		0.837673	4.89022		0.988892	0.139996		0.691429	0.217236
	0.0905324	3.97622		0.324325	1.38387		0.190019	5.68031		0.332284	0.81745
	0.186039	0.139996		16.0869	2.80797		0.337258	0.259074		0.219864	0.119077
	0.0736198	3.17969		0.807828	0.217236		0.0994862	0.131951		2.21556	0.146433
	0.042779	8.51725		0.630742	0.111032		1.74101	0.104595		0.138286	0.635616
	0.280551	0.181834		0.112419	0.405507		0.103466	0.259074		0.0905324	2.29948
	0.496436	0.244591		0.206931	2.43787		0.10844	0.292866		1.91411	1.03469
	0.086553	0.139996		0.112419	0.859288		3.47704	0.259074		0.785941	0.334704
	0.0905324	1.76041		0.103466	5.39388		0.885427	0.202753		0.116399	0.154479
	0.280551	0.0772394		0.151219	0.167352		0.0686454	0.363669		0.232798	0.279993
	1.71514	0.0691936		0.202952	0.20919		1.55497	0.579295		0.142265	0.349186
	0.147239	0.160915		0.064666	0.104595		1.11027	0.411943		0.241751	0.621133
	0.0477534	0.307348		0.116399	3.89254		2.06434	1.3002		1.6843	0.453781
	0.0517328	9.93492		0.725254	0.188271		0.401924	0.111032		0.0736198	0.104595
	0.042779	0.181834		0.142265	1.01377		0.0736198	0.251028		0.186039	0.566422
	0.337258	0.160915		0.0815787	0.775612		0.0775992	0.146433		0.462611	0.196317
	0.186039	0.0981584		1.11922	0.811014		0.103466	0.782049		0.198972	0.223672
	0.121373	0.831933		0.142265	0.175398		0.496436	0.188271		0.103466	3.29072
	0.211905	0.0901126		0.086553	2.04684		0.173106	0.111032		0.332284	2.89326
	0.198972	0.131951		0.193998	0.139996		0.086553	2.05489		0.181065	0.495619
	4.82906	0.0691936		0.086553	1.53031		0.803848	0.292866		0.0736198	0.154479
	0.0517328	0.0772394		3.7367	0.146433		0.579009	0.202753		1.14011	0.181834
	0.193998	0.0981584		0.250705	0.160915		1.60272	0.160915		1.07147	0.160915
	0.042779	0.0772394		0.0905324	3.39532		0.0736198	0.175398		0.164152	0.823887
	0.10844	0.104595		0.198972	1.36939		0.160173	0.154479		0.0955067	0.125514
	2.47919	0.104595		0.186039	0.119077		1.42166	0.154479		0.134306	0.524584
	0.324325	1.35491		0.0955067	3.22153		0.691429	0.531021		0.155198	0.104595
	0.042779	11.6615		0.0994862	0.119077		0.121373	0.181834		0.134306	0.175398
	0.173106	0.111032		4.32864	0.139996		0.794894	0.558376		0.496436	2.19328
	0.0477534	0.104595		0.0775992	0.244591		0.816781	0.244591		0.0955067	0.111032
	0.0686454	0.963883		0.125353	0.740211		0.112419	0.146433		1.45548	0.20919
	0.042779	16.8945		3.04925	12.7799		0.0686454	1.37583		0.496436	2.66959
	0.0606866	8.43358		4.32864	0.614697		5.04494	0.286429		0.0775992	0.440908
	0.116399	0.698373		1.36495	0.259074		1.14509	0.230109		0.121373	2.88521
	5.48169	0.865725		0.168132	0.397461		0.0994862	0.167352		0.228818	2.87234
	0.997846	0.0691936		0.155198	2.47327		0.0905324	0.111032		0.160173	0.307348
	0.0477534	0.545503		0.427791	0.196317		0.259659	0.175398		0.704362	0.349186
	0.0477534	4.20633		0.752115	0.440908		0.10844	0.160915		0.531256	1.85857
	0.0994862	1.69122		0.0905324	0.579295		1.3172	0.196317		1.98674	1.50939
	0.151219	0.419989		0.0775992	0.125514		1.17095	0.60826		0.354171	0.886644
	0.086553	1.80225		0.064666	0.119077		0.064666	0.593778		0.975959	0.223672
	0.103466	0.111032		0.319351	0.384588		0.544189	3.89254		0.769028	0.217236
	0.147239	0.397461		0.086553	1.06848		0.151219	0.111032		0.121373	1.35491
	0.0557122	0.859288		0.215885	0.139996		0.112419	0.104595		0.765049	0.26551
	0.042779	2.6197		0.125353	0.671017		0.129332	0.181834		0.306417	0.516538
	0.228818	1.60755		0.181065	0.111032		1.71912	0.20919		1.01476	0.139996
	0.042779	4.47828		0.241751	0.202753		0.125353	0.238155		0.418837	11.927
	0.206931	0.244591		1.09335	0.131951		0.656609	0.642053		0.272592	1.79582
	0.042779	0.251028		1.7231	12.0172		0.173106	0.111032		0.289505	1.0556
	2.94181	3.87806		4.03914	0.175398		0.0736198	0.279993		0.0994862	0.453781
	0.315371	0.802968		0.0686454	1.43215		0.0994862	0.160915		0.0815787	2.38316
	0.0815787	0.119077		0.0775992	0.125514		0.337258	0.251028		0.423811	0.230109
	0.0905324	0.34275		0.514343	0.558376		0.103466	0.139996		0.0815787	1.4949
	0.0517328	0.104595		0.475544	0.111032		0.0905324	0.823887		0.955067	1.61398
	0.0517328	0.119077		0.405903	2.71143		0.142265	2.80154		0.0775992	0.447345
	0.254685	2.01949		0.0775992	2.2496		1.18786	0.154479		0.0736198	0.376542
	0.151219	0.111032		11.4389	2.12408		0.245731	0.111032		0.138286	7.07706
	1.58581	0.125514		0.449678	0.125514		4.08192	0.60826		0.10844	0.139996
	0.064666	11.1659		0.155198	1.87305		0.483503	0.307348		1.44752	0.131951
	0.570056	0.0901126		0.0775992	0.223672		0.97198	0.131951		0.064666	2.18684
	0.042779	0.146433		0.134306	0.259074		1.2008	0.104595		1.33013	2.09673
	0.151219	0.111032		0.129332	0.587341		0.0815787	0.160915		1.02769	0.20919
	0.125353	0.104595		0.064666	0.119077		0.147239	0.244591		1.6067	3.08797
	0.0905324	0.175398		0.89836	0.363669		0.259659	0.104595		0.0994862	5.39388
	0.0736198	0.363669		3.08905	2.425		0.963026	0.160915		1.32615	5.4148
	0.0775992	0.125514		0.440724	0.238155		0.086553	0.167352		0.660588	0.524584
	0.10844	5.35848		0.527277	2.9351		0.0994862	0.167352		0.332284	0.907563
	0.0775992	0.146433		0.224839	0.26551		0.0775992	0.196317		0.345217	0.397461
	0.0606866	1.43858		0.0815787	1.26479		1.91411	0.196317		1.92207	0.167352
	0.0955067	0.928482		0.198972	0.104595		0.531256	0.223672		0.228818	2.16592
	0.116399	5.00286		0.0736198	0.838369		0.0686454	0.125514		3.6979	0.146433
	0.449678	5.34561		0.54021	5.86859		1.81861	0.111032		0.064666	2.8997
	0.116399	3.89898		0.0775992	0.886644		0.50539	0.432862		4.59228	0.307348
	1.20478	0.160915		0.232798	4.92562		0.103466	0.251028		0.0736198	0.844806
	0.086553	0.0691936		2.78661	0.160915		0.202952	0.160915		0.086553	0.181834
	3.47306	0.20919		3.45118	0.244591		0.155198	0.175398		0.955067	3.29716
	0.125353	0.230109		0.121373	4.45092		0.0686454	0.307348		0.0686454	0.76113
	0.0775992	0.0691936		6.44471	0.355623		5.74533	0.286429		3.62428	0.146433
	0.0477534	0.307348		0.285525	0.230109		0.134306	0.125514		0.086553	5.59664
	0.160173	1.55766		0.232798	5.06562		0.0905324	0.119077		5.73637	6.18398
	0.042779	0.119077		0.147239	0.181834		0.155198	0.139996		0.0994862	0.286429
	0.587963	0.0772394		0.263638	0.104595		0.116399	0.440908		0.224839	2.23511
	0.173106	0.167352		3.33478	4.04541		0.186039	0.217236		0.0815787	7.0143
	0.0905324	0.447345		0.0736198	0.432862		0.280551	0.139996		2.23744	3.80726
	0.414857	0.971929		0.0994862	0.453781		0.302438	0.175398		1.08838	0.355623
	0.367104	0.0981584		0.064666	1.43858		0.112419	0.125514		0.103466	0.55194
	0.276572	0.461827		0.138286	4.09369		0.241751	0.154479		0.155198	3.03969
	0.10844	0.111032		0.388991	4.60379		0.215885	0.131951		0.376058	6.47041
	0.820761	0.503665		0.125353	6.00858		0.112419	0.524584		1.07147	4.13553
	1.69325	1.48203		0.112419	0.188271		0.0686454	0.524584		0.0775992	6.88235
	0.103466	1.71214		0.0775992	0.922045		2.23346	0.349186		3.84017	0.188271
	0.889406	0.188271		1.73603	0.334704		0.725254	0.300912		0.224839	15.295
	1.0844	0.510102		0.241751	0.328267		0.0686454	0.104595		0.630742	0.545503
	0.138286	0.0981584		1.21771	0.698373		2.17278	0.217236		0.116399	0.160915
	0.418837	0.083676		1.15802	6.45593		0.0994862	0.119077		0.418837	0.313785
	1.36893	0.0981584		0.064666	0.230109		0.409883	0.104595		0.354171	0.125514
	0.712321	0.307348		2.33693	0.915609		1.93998	0.20919		0.0994862	0.901126
	0.35815	0.125514		1.31322	0.154479		0.0775992	0.104595		1.14011	0.181834
	0.367104	0.244591		0.337258	0.453781		0.103466	2.26408		0.103466	12.3326
	0.202952	0.363669		0.553143	0.545503		0.0994862	0.259074		1.98674	2.29143
	0.0517328	0.859288		2.72095	0.823887		2.21556	1.23744		0.0736198	0.419989
	0.112419	0.334704		3.36462	0.188271		0.086553	0.125514		0.341238	0.181834
	0.354171	0.0981584		1.79274	2.76614		0.436744	0.131951		4.32864	0.160915
	0.708341	0.0981584		0.0994862	0.196317		0.0815787	0.775612		0.673521	1.11032
	0.0815787	0.139996		0.151219	0.131951		0.0815787	0.865725		0.341238	0.104595
	0.0686454	2.41695		0.872494	1.01377		0.103466	0.537458		4.13365	0.167352
	0.911293	0.160915		0.0775992	0.545503		0.064666	0.131951		0.436744	0.984802
	0.0557122	0.104595		0.151219	0.111032		2.26829	0.131951		1.99569	0.907563
	0.0994862	1.90041		0.600896	0.397461		0.10844	0.167352		0.0736198	0.20919
	0.129332	0.139996		0.138286	2.7243		0.0686454	0.489183		0.116399	0.20919
	0.0606866	0.642053		0.401924	0.292866		0.232798	0.119077		0.380037	0.202753
	0.224839	2.16592		0.193998	0.376542		0.129332	0.230109		0.850607	0.188271
	0.0955067	0.76113		0.177085	0.131951		1.98674	0.321831		2.34091	2.7243
	0.920247	0.083676		0.902339	1.58663		0.112419	0.139996		0.202952	0.111032
	0.0686454	0.859288		1.68928	0.181834		0.0686454	0.629179		0.0736198	12.2135
	10.061	1.27928		0.0955067	0.823887		0.103466	0.131951		0.064666	0.468264
	0.993867	0.0772394		0.168132	0.426426		0.0994862	0.593778		0.116399	0.104595
	2.95076	0.831933		0.086553	0.279993		0.0736198	0.202753		0.193998	0.111032
	0.064666	0.0772394		2.06931	0.188271		0.125353	0.524584		0.0775992	0.111032
	0.198972	2.04041		0.955067	0.545503		2.10811	0.125514		0.064666	8.10531
	0.10844	0.202753		0.807828	0.160915		0.138286	1.23744		0.0815787	4.96102
	10.3635	7.41337		0.0686454	0.139996		0.436744	0.119077		0.129332	8.98552
	0.630742	0.0901126		0.228818	0.614697		0.885427	0.230109		1.54601	2.15949
	0.0815787	0.083676		0.0686454	0.111032		0.0736198	0.146433		4.34954	0.131951
	0.160173	0.083676		0.177085	0.928482		0.0775992	5.43572		0.138286	1.93581
	0.0955067	0.104595		0.116399	0.181834		0.138286	0.217236		2.70403	0.188271
	0.280551	0.083676		0.0775992	0.223672		0.0955067	12.9473		2.06036	0.131951
	0.198972	1.11032		0.160173	2.03397		0.0686454	0.131951		0.496436	1.58663
	0.553143	0.111032		0.457636	0.328267		0.151219	0.146433		8.95077	0.790095
	0.0517328	0.279993		0.734208	0.419989		0.164152	0.217236		0.151219	0.279993
	0.0557122	0.0691936		0.302438	0.125514		0.0775992	0.349186		0.699388	0.20919
	2.64335	0.119077		0.0686454	0.104595		0.155198	0.111032		0.193998	4.89022
	3.14078	0.650098		0.0736198	0.748257		0.064666	3.46612		0.237772	0.971929
	1.30426	0.251028		0.10844	0.238155		0.587963	0.139996		3.29598	2.31235
	0.0775992	0.537458		0.35815	0.217236		0.147239	0.167352		1.7231	3.17164
	0.160173	2.71143		0.0905324	0.167352		1.69723	0.131951		0.228818	0.196317
	0.116399	0.0901126		0.103466	0.111032		0.173106	0.104595		0.177085	0.104595
	0.0606866	0.545503		0.0905324	0.119077		0.0736198	0.202753		0.125353	1.00572
	0.621789	0.461827		0.0686454	0.111032		2.96369	0.629179		3.86603	0.453781
	0.121373	0.579295		0.691429	0.992848		0.0736198	0.119077		0.142265	8.44806
	0.129332	0.614697		0.846627	0.125514		0.129332	0.154479		3.21838	0.370105
	0.0557122	0.139996		0.103466	0.175398		0.151219	0.181834		0.241751	12.9054
	0.665562	0.370105		0.721275	1.13123		0.173106	0.125514		0.527277	0.26551
	0.479523	7.95888		0.341238	0.754693		0.254685	0.146433		0.10844	0.104595
	0.121373	4.17093		0.112419	0.691936		0.0736198	0.111032		0.595922	0.244591
	0.0517328	0.154479		0.147239	0.175398		0.0955067	0.271947		2.85923	2.06133
	0.0994862	0.131951		0.409883	0.453781		0.064666	0.131951		1.20975	0.167352
	0.553143	0.217236		0.574035	0.510102		0.186039	0.426426		0.10844	0.125514
	0.254685	0.083676		0.0736198	0.733774		0.0736198	0.131951		0.50141	0.111032
	1.20975	1.54479		0.103466	4.15805		0.0736198	0.104595		0.0905324	0.111032
	0.103466	0.0691936		0.147239	0.271947		0.112419	0.111032		0.267618	0.119077
	0.0686454	0.196317		0.0955067	0.313785		0.324325	0.131951		0.232798	0.111032
	0.042779	1.25836		0.245731	0.20919		0.10844	0.154479		0.10844	0.20919
	0.790915	1.79582		0.0686454	3.08153		0.245731	2.58591		0.0955067	4.16449
	0.0994862	0.119077		0.160173	0.167352		5.18323	0.131951		0.0775992	0.223672
	0.042779	0.0981584		0.345217	3.03969		0.0815787	0.230109		0.345217	0.419989
	0.0905324	0.0772394		0.116399	0.196317		0.0686454	0.167352		0.388991	3.10889
	0.0557122	0.217236		1.48632	0.181834		0.064666	0.104595		0.0955067	0.524584
	0.0517328	0.111032		0.164152	2.73878		0.0686454	0.167352		0.0905324	2.15949
	0.0955067	0.131951		0.785941	0.642053		0.134306	0.474701		0.341238	0.20919
	0.0775992	0.217236		0.112419	1.50295		0.086553	0.104595		0.237772	0.238155
	0.587963	0.0901126		0.427791	0.259074		2.00863	0.175398		2.17278	0.244591
	0.0477534	0.167352		0.0905324	0.957447		0.086553	0.334704		0.272592	0.334704
	0.409883	2.78062		0.354171	0.936528		0.064666	0.125514		0.215885	1.93581
	1.83154	0.167352		1.93998	0.119077		0.0815787	4.93206		2.30708	1.1248
	0.557122	0.0691936		0.112419	0.579295		9.20148	0.181834		0.298459	3.03969
	1.73603	1.43858		0.0994862	0.89469		0.215885	0.104595		0.0686454	0.545503
	0.129332	6.1695		0.193998	0.217236		0.0686454	0.111032		0.0955067	0.244591
	0.138286	1.99052		0.112419	0.495619		2.51004	0.160915		0.306417	0.34275
	0.0477534	0.642053		0.160173	11.1997		0.0905324	0.139996		0.134306	0.292866
	0.0775992	0.146433		0.237772	0.223672		0.0815787	6.12122		0.0775992	0.545503
	0.889406	0.587341		0.289505	0.719292		0.0815787	0.384588		3.28304	0.251028
	0.0557122	3.17969		1.50721	0.614697		0.125353	0.167352		0.151219	0.271947
	8.85128	0.230109		0.855581	3.73163		0.337258	0.334704		1.17493	7.11246
	0.409883	0.963883		0.319351	1.18112		1.14907	0.259074		4.27194	9.51654
	0.190019	0.202753		0.328304	1.36295		0.112419	0.104595		0.10844	0.811014
	0.147239	0.083676		0.155198	0.167352		0.0815787	0.26551		0.112419	1.00572
	0.224839	0.405507		0.492457	0.160915		2.08623	0.167352		0.39695	0.223672
	0.064666	0.188271		0.186039	4.68907		0.0905324	0.34275		0.219864	0.131951
	0.151219	0.26551		0.245731	0.125514		0.160173	0.60826		0.311392	0.852852
	0.112419	3.70266		0.215885	0.160915		0.160173	0.621133		0.129332	0.196317
	0.202952	0.104595		0.254685	0.531021		0.10844	0.292866		0.0736198	1.43858
	0.0994862	0.146433		0.177085	0.572859		0.177085	0.230109		0.678496	1.22296
	0.0905324	0.0981584		0.190019	0.167352		0.173106	2.11765		3.05821	5.64491
	1.57288	0.0772394		1.28735	0.196317		1.03267	0.175398		0.337258	0.111032
	0.086553	0.259074		0.582989	0.223672		0.682475	0.188271		0.280551	0.104595
	0.449678	0.244591		0.0815787	9.82389		0.652629	0.154479		0.889406	0.154479
	0.168132	0.104595		0.103466	2.59235		0.0905324	0.104595		0.193998	11.6471
	0.0736198	0.0691936		0.0686454	0.259074		0.483503	0.223672		0.647655	0.95101
	0.0517328	4.21277		0.0905324	0.146433		0.0686454	1.13928		0.0815787	0.334704
	0.0557122	0.230109		0.306417	3.31808		0.160173	0.957447		0.587963	1.55766
	0.164152	0.963883		0.125353	8.08439		3.40442	0.376542		0.168132	0.139996
	0.042779	0.188271		0.401924	4.19989		0.134306	0.355623		0.332284	0.125514
	0.042779	2.77418		2.13398	3.8153		0.0905324	0.537458		0.138286	3.57071
	0.0994862	0.131951		0.121373	6.63132		0.0815787	0.461827		0.138286	0.334704
	0.315371	0.202753		0.0775992	0.230109		0.0905324	8.11175		0.0686454	9.43286
	0.0686454	0.111032		3.6203	8.70552		0.0686454	0.384588		1.80567	0.790095
	0.042779	1.62846		1.49428	3.49991		1.42166	2.19328		0.639696	2.75326
	0.0557122	0.139996		0.254685	2.30592		0.219864	0.34275		1.27044	1.42571
	0.324325	2.98981		0.380037	0.844806		0.116399	0.405507		1.10131	0.516538
	0.042779	0.083676		1.10131	0.313785		0.064666	1.6349		0.678496	0.461827
	0.224839	0.111032		1.23562	4.22081		0.574035	0.271947		0.0815787	6.23225
	0.0517328	0.355623		0.384017	0.230109		0.129332	5.34561		0.0775992	0.489183
	0.0557122	0.202753		0.0955067	1.30663		0.224839	0.740211		0.920247	0.181834
	0.0686454	1.59306		0.86354	0.111032		0.0686454	0.154479		0.0994862	7.35062
	0.164152	0.0772394		0.103466	0.196317		0.0815787	8.80368		0.0736198	2.13857
	0.350191	0.083676		0.181065	0.20919		0.160173	2.58591		0.198972	0.307348
	0.0815787	0.587341		0.064666	0.167352		0.116399	3.76542		0.112419	0.292866
	0.479523	0.104595		2.67419	7.51797		0.354171	3.19256		0.756095	1.94869
	0.0905324	0.0691936		0.337258	1.78133		0.142265	3.51439		0.177085	4.38012
	0.894381	6.27409		1.0456	0.139996		0.125353	0.447345		0.121373	3.71715
	0.955067	1.90041		0.259659	0.111032		0.151219	1.11836		0.704362	0.175398
	0.820761	0.677454		0.341238	0.181834		0.112419	0.104595		1.79274	3.28428
	0.289505	0.125514		1.05853	0.419989		0.820761	0.181834		0.103466	0.251028
	0.0517328	0.083676		0.0775992	6.67316		1.23562	0.160915		0.0905324	0.307348
	0.155198	0.474701		0.086553	0.139996		0.0736198	0.677454		0.604876	0.886644
	0.0815787	0.125514		0.43177	0.307348		2.93783	0.440908		0.129332	0.119077
	0.116399	0.691936		0.250705	5.15573		0.0736198	1.0202		2.60057	2.73878
	0.673521	0.119077		0.241751	0.202753		0.151219	0.125514		0.186039	1.48847
	0.250705	0.259074		0.0775992	6.0295		0.0955067	0.391024		0.93318	6.19041
	0.0606866	0.706419		0.794894	1.67674		0.0955067	0.461827		0.142265	0.271947
	0.0606866	0.572859		2.30211	7.88164		0.0955067	2.02592		1.31322	0.146433
	0.228818	0.0981584		0.125353	0.111032		0.0955067	0.26551		0.0686454	0.313785
	0.042779	4.74379		0.155198	1.1602		0.064666	0.271947		0.121373	0.188271
	0.064666	0.167352		1.47737	0.244591		0.138286	0.181834		0.0775992	0.363669
	0.0775992	0.167352		0.0736198	3.22796		0.444703	2.78062		0.54021	2.83694
	0.042779	2.20132		0.617809	0.202753		0.160173	3.83622		0.245731	0.468264
	0.134306	0.0981584		0.198972	2.36224		0.219864	0.838369		0.224839	0.328267
	0.0994862	0.119077		0.215885	0.334704		0.086553	0.167352		0.363125	0.146433
	0.0606866	0.167352		0.198972	1.41123		0.121373	1.39675		0.186039	0.355623
	0.0517328	0.271947		0.259659	2.16592		2.16382	0.119077		0.604876	5.56928
	0.0477534	4.99642		0.518323	0.125514		0.0775992	0.175398		0.173106	0.271947
	8.31107	0.125514		0.086553	0.662971		0.0905324	0.139996		0.228818	0.727338
	0.103466	0.0981584		1.30028	0.181834		0.10844	0.119077		0.177085	1.94869
	0.0477534	0.0772394		0.263638	1.06848		0.190019	11.927		0.10844	0.971929
	0.876473	0.175398		1.36893	4.27552		0.193998	0.621133		0.134306	0.146433
	0.116399	0.111032		0.35815	1.96317		0.0775992	0.111032		0.548169	2.01305
	1.86139	0.0691936		1.06251	0.453781		0.064666	0.405507		0.173106	0.125514
	0.064666	0.629179		0.215885	0.111032		0.0686454	2.60683		0.241751	0.691936
	0.0736198	0.083676		0.259659	0.370105		0.0736198	1.26479		0.337258	0.20919
	0.042779	0.432862		0.0905324	1.94869		0.263638	0.119077		0.267618	0.307348
	0.280551	0.111032		0.929201	0.104595		0.0736198	0.104595		0.245731	0.503665
	0.181065	0.621133		0.717295	0.440908		0.103466	0.334704		3.47704	0.139996
	0.0606866	0.621133		0.151219	0.782049		0.147239	0.188271		0.518323	0.468264
	0.0606866	0.587341		0.241751	0.154479		0.302438	0.482746		2.06434	1.53674
	0.760074	6.44949		0.198972	0.461827		0.086553	0.181834		3.09302	0.642053
	0.267618	2.3204		0.259659	3.8845		0.0775992	0.453781		0.177085	0.859288
	1.03665	0.313785		0.527277	5.42929		0.112419	0.167352		0.289505	0.160915
	0.042779	9.9494		0.211905	1.06848		0.0686454	0.196317		10.449	0.131951
	5.88759	0.083676		0.604876	6.25961		0.202952	0.621133		0.315371	0.873771
	0.518323	3.36796		0.354171	3.01877		1.68032	0.188271		0.39695	2.47327
	3.10596	1.25836		0.164152	0.188271		0.0686454	0.271947		0.298459	3.57071
	1.26546	0.139996		0.328304	0.154479		0.544189	1.1602		0.173106	0.20919
	0.647655	5.00286		0.384017	6.23225		0.902339	1.54479		0.211905	0.901126
	0.955067	4.01001		0.639696	1.73306		0.0736198	0.635616		1.72808	0.230109
	0.0686454	0.292866		0.112419	2.55051		0.116399	0.411943		0.916268	0.6855
	0.0557122	3.52083		0.164152	0.468264		0.232798	0.662971		0.138286	2.01949
	0.691429	0.0901126		0.621789	3.47255		0.0994862	0.119077		11.2877	0.432862
	0.0517328	0.223672		0.0686454	12.7445		0.46659	0.349186		0.116399	0.131951
	0.0517328	1.04756		0.475544	0.370105		0.0736198	1.3002		0.198972	1.24388
	0.181065	0.217236		2.69508	1.03469		0.155198	2.44591		0.173106	0.20919
	0.0905324	0.196317		0.103466	0.482746		1.02769	0.188271		0.0686454	0.411943
	0.302438	0.223672		0.794894	1.85214		1.34804	3.98266		0.0955067	0.181834
	0.544189	1.31307		0.168132	2.78706		0.112419	0.146433		0.738187	0.175398
	0.302438	0.334704		3.24026	0.286429		0.328304	1.03469		0.086553	2.145
	0.0517328	0.0901126		0.237772	10.8087		0.548169	0.238155		1.93501	0.230109
	0.647655	0.698373		0.833694	6.2049		0.302438	0.566422		0.129332	0.259074
	0.064666	2.12408		0.0736198	0.146433		0.630742	0.104595		2.18571	0.244591
	0.518323	0.334704		5.86571	0.468264		0.267618	0.363669		0.781961	2.34132
	0.0606866	0.139996		0.10844	1.48203		1.06649	0.474701		2.89903	0.271947
	0.582989	1.5995		0.219864	4.44448		2.40657	1.38387		0.97198	0.334704
	0.0815787	1.70409		0.232798	0.397461		1.30028	0.202753		0.371083	0.349186
	0.0775992	1.55122		0.639696	2.3204		0.064666	0.907563		1.64152	0.313785
	0.423811	8.3499		1.30028	1.43858		0.457636	2.71143		0.276572	5.62399
	0.0905324	0.411943		0.121373	2.52959		1.63257	0.119077		0.337258	1.70409
	0.324325	0.083676		0.211905	0.740211		0.160173	0.503665		0.267618	0.196317
	0.10844	0.146433		0.250705	3.06705		0.457636	1.57214		0.186039	0.104595
	0.103466	0.20919		0.384017	5.98766		0.121373	3.99714		0.206931	0.202753
	0.0994862	0.188271		0.691429	0.160915		0.734208	0.119077		0.112419	1.00572
	0.0686454	0.391024		0.0736198	1.52387		0.168132	0.175398		0.147239	0.20919
	0.462611	0.384588		0.0955067	6.23225		0.337258	0.238155		0.582989	0.419989
	0.388991	0.119077		0.151219	0.196317		0.086553	0.202753		0.0686454	0.154479
	0.0477534	1.5995		0.345217	0.76113		0.151219	4.66655		0.0994862	1.25031
	0.147239	0.321831		0.064666	2.20776		0.206931	3.10245		0.574035	0.119077
	1.24855	0.111032		0.0994862	0.748257		0.168132	1.15215		0.0736198	6.72144
	0.042779	0.34275		0.164152	0.928482		1.24457	0.831933		0.0815787	0.146433
	0.0517328	0.0691936		0.440724	2.64867		0.0686454	1.65582		0.164152	1.36939
	0.042779	1.10388		0.198972	0.432862		0.116399	1.06204		1.01973	3.47899
	0.042779	0.60826		0.0686454	3.01877		0.193998	5.14929		0.173106	0.495619
	0.0955067	0.0981584		0.376058	5.67388		0.444703	0.313785		0.259659	0.355623
	0.0736198	0.0901126		0.0686454	0.60826		0.293484	0.202753		0.064666	2.16592
	0.186039	0.566422		0.129332	2.2142		0.444703	2.145		0.064666	0.727338
	0.621789	1.18756		0.89836	0.461827		0.228818	3.27624		0.116399	1.0894
	0.0736198	0.125514		0.237772	0.572859		0.0736198	0.313785		1.55497	0.181834
	0.160173	0.119077		0.064666	3.65439		0.691429	0.593778		0.232798	0.26551
	0.112419	0.328267		0.833694	0.202753		0.10844	1.4595		0.129332	8.60093
	0.215885	4.52816		0.0955067	0.426426		2.56177	3.48704		0.160173	0.202753
	0.0517328	0.131951		0.0905324	0.76113		0.254685	2.71786		0.121373	4.23368
	0.816781	0.223672		0.10844	6.76971		1.93103	0.321831		0.116399	0.104595
	0.254685	0.131951		0.61383	0.426426		0.0686454	0.271947		0.267618	0.600214
	0.042779	0.104595		0.708341	3.55623		0.479523	0.104595		1.90019	0.503665
	0.228818	0.370105		0.717295	0.468264		1.19682	0.524584		0.103466	2.92061
	0.0736198	1.16664		0.0994862	0.119077		0.181065	2.36868		0.0905324	0.992848
	0.0736198	0.865725		0.54021	0.712855		0.155198	0.537458		8.28521	0.104595
	0.0517328	0.489183		0.142265	0.426426		0.0736198	0.119077		0.206931	0.957447
	0.0955067	0.139996		0.160173	0.489183		0.206931	0.125514		0.164152	0.524584
	0.93716	0.104595		0.850607	0.259074		0.086553	0.271947		0.147239	0.300912
	1.17493	0.796531		0.125353	0.593778		1.05356	0.76113		0.765049	0.524584
	0.064666	0.0901126		1.73205	7.74808		1.34306	0.160915		0.121373	0.363669
	0.219864	0.230109		0.0775992	0.6855		0.0736198	0.307348		0.125353	10.4112
	0.064666	0.642053		0.064666	0.217236		0.699388	2.75326		0.0736198	0.468264
	0.444703	0.0901126		0.535236	1.57214		1.66739	2.13052		2.95076	12.4516
	0.042779	1.38387		1.55497	0.313785		0.0775992	1.3002		0.10844	1.7749
	0.0517328	0.104595		0.116399	0.461827		1.15802	0.154479		0.245731	0.202753
	0.0606866	0.181834		2.54386	0.886644		0.224839	1.00572		0.704362	2.31235
	0.0477534	1.48847		0.086553	0.936528		1.45548	1.4949		0.0815787	1.02664
	0.0557122	0.104595		0.600896	4.71643		0.155198	3.15877		0.129332	0.20919
	2.37573	1.45307		0.0775992	1.53031		0.35815	0.790095		0.263638	3.19256
	0.190019	0.712855		1.06649	0.300912		2.40657	0.181834		1.2008	0.397461
	0.042779	2.97694		4.84199	2.16592		0.50141	0.223672		0.116399	1.85857
	0.064666	0.139996		0.10844	0.244591		0.717295	0.901126		2.03847	3.10245
	0.0736198	0.811014		0.0775992	0.286429		0.193998	0.139996		0.181065	1.71858
	1.11027	1.15215		0.46659	0.223672		0.064666	0.978366		3.47306	0.139996
	0.868514	0.230109		0.121373	0.111032		2.85525	0.55194		2.99752	1.02664
	0.042779	2.71786		0.064666	0.579295		1.3948	2.61327		0.427791	1.64134
	0.0815787	0.286429		0.202952	0.271947		0.708341	0.823887		0.319351	0.167352
	0.202952	0.376542		2.42746	4.41552		1.3172	2.71786		0.190019	0.251028
	0.0994862	0.146433		0.276572	0.131951		1.15802	0.230109		0.376058	0.482746
	0.198972	0.447345		0.112419	3.04613		0.319351	0.468264		0.0736198	0.111032
	0.103466	0.537458		0.224839	0.334704		0.509369	0.391024		0.643675	0.223672
	0.103466	0.629179		0.773007	3.13785		3.74963	0.125514		0.168132	0.154479
	0.0905324	1.31307		0.289505	2.77418		0.125353	0.279993		1.87929	1.26479
	0.337258	2.8997		1.30426	2.06776		0.0815787	3.78634		0.337258	2.7597
	0.129332	0.0901126		0.086553	1.11032		0.39695	0.405507		0.354171	0.516538
	0.708341	0.0691936		0.0994862	2.01305		0.371083	1.62042		0.350191	0.880207
	0.306417	0.963883		0.112419	0.461827		0.151219	1.7749		0.350191	0.26551
	0.103466	0.447345		0.0686454	1.06848		2.73488	0.259074		0.155198	0.886644
	0.215885	0.957447		5.66773	0.391024		0.103466	0.119077		0.47057	0.292866
	1.13613	1.92777		0.138286	0.202753		0.47057	0.397461		0.0686454	0.34275
	0.160173	1.11032		0.129332	0.119077		0.267618	0.432862		0.064666	0.482746
	0.10844	0.516538		0.164152	0.566422		0.193998	0.196317		0.125353	0.978366
	0.103466	0.279993		0.0736198	0.558376		2.66523	0.419989		0.522302	2.08224
	0.97198	0.083676		0.259659	2.04041		0.259659	0.635616		0.0686454	0.558376
	5.96519	0.167352		0.173106	0.971929		3.98243	0.119077		0.621789	1.38387
	4.23811	0.175398		2.50108	0.405507		1.19682	0.831933		0.363125	0.495619
	0.0686454	0.202753		0.147239	0.119077		2.90699	0.175398		0.0686454	0.313785
	0.0736198	0.292866		0.134306	0.104595		0.121373	2.82246		0.211905	3.16521
	0.168132	0.81745		0.483503	0.823887		0.138286	0.936528		0.168132	2.10316
	0.086553	0.0691936		0.272592	2.49419		0.186039	3.11693		0.064666	0.111032
	0.354171	0.0772394		0.241751	0.81745		0.177085	1.35491		0.449678	4.45736
	0.042779	0.957447		0.0815787	1.37583		0.617809	0.154479		0.324325	1.02664
	0.0606866	1.44663		1.40375	0.468264		0.0994862	0.587341		0.0815787	0.321831
	0.0606866	0.181834		0.50141	0.111032		0.0736198	2.6197		2.57072	0.181834
	0.673521	0.34275		5.41702	0.223672		0.177085	0.111032		0.064666	8.8246
	0.042779	0.104595		1.90914	0.838369		0.337258	4.63919		0.193998	0.251028
	1.90019	0.0691936		0.0686454	0.202753		1.92705	1.33399		3.64119	0.131951
	0.064666	0.992848		0.773007	0.181834		0.35815	0.712855		1.43857	9.99124
	0.384017	0.376542		2.60455	0.719292		0.285525	0.516538		0.280551	0.238155
	0.0736198	0.111032		0.0815787	3.76542		0.401924	0.999285		0.634722	0.230109
	0.042779	0.0691936		3.85708	0.706419		3.20047	2.08868		0.289505	0.146433
	0.103466	3.29072		1.71912	1.96317		0.885427	1.11032		0.0775992	10.5641
	0.0477534	0.0691936		10.6958	3.05256		0.121373	0.188271		0.354171	0.119077
	0.0905324	0.495619		0.0955067	8.11175		0.112419	0.769176		0.190019	0.629179
	1.19184	0.376542		0.0815787	0.510102		0.064666	0.188271		0.245731	0.139996
	0.293484	0.370105		0.086553	1.16664		0.086553	0.698373		0.125353	2.71786
	0.259659	0.104595		0.129332	1.89397		0.423811	2.02592		0.129332	1.17307
	0.0606866	0.397461		0.138286	1.06848		0.0775992	6.01502		0.241751	2.85142
	1.36495	0.119077		6.00896	0.838369		0.064666	0.154479		0.215885	2.36224
	0.0517328	0.531021		9.59843	4.01806		0.579009	0.119077		0.164152	0.131951
	0.285525	0.748257		3.6979	0.131951		0.173106	2.66959		0.186039	0.432862
	1.78876	0.119077		0.155198	2.18684		0.064666	1.35491		0.0736198	0.104595
	0.0517328	0.321831		0.0815787	3.36152		0.496436	1.39675		1.42166	0.510102
	0.042779	1.32112		0.202952	0.131951		0.064666	0.146433		2.77765	0.251028
	0.129332	0.447345		0.43177	0.111032		0.0815787	0.202753		0.531256	0.251028
	2.03847	0.0772394		1.16598	0.154479		0.138286	0.119077		0.186039	0.355623
	2.15984	0.175398		0.0815787	2.92705		0.064666	3.29072		0.129332	0.167352
	0.0557122	0.119077		0.0686454	0.516538		0.0775992	0.223672		0.289505	2.57787
	0.219864	0.321831		1.2008	4.22725		0.0815787	0.349186		0.0905324	0.355623
	0.0905324	0.119077		0.475544	4.33184		0.0736198	1.3002		0.0815787	4.19185
	0.168132	0.139996		0.509369	0.104595		0.777982	1.21652		0.548169	1.82317
	0.121373	0.167352		0.608855	0.146433		0.224839	2.29143		0.138286	0.671017
	0.0477534	0.0772394		1.57288	0.20919		0.673521	2.04684		0.46659	0.419989
	0.112419	4.23368		0.0994862	4.59092		0.155198	0.181834		1.80965	0.26551
	0.656609	0.181834		0.121373	0.181834		0.0815787	0.111032		0.959047	0.119077
	0.177085	0.432862		0.0736198	0.259074		0.151219	0.104595		0.142265	1.57214
	0.042779	0.0981584		1.30924	7.27981		0.173106	0.230109		0.168132	0.119077
	1.02769	1.04756		0.457636	0.111032		0.0815787	0.131951		0.0686454	0.139996
	0.0557122	5.91042		0.54021	2.88521		0.0775992	1.64134		0.738187	6.35133
	0.129332	0.154479		0.0905324	6.07938		0.457636	0.300912		0.116399	0.321831
	0.10844	0.524584		0.193998	1.01377		1.44752	0.558376		0.0994862	0.160915
	0.440724	0.328267		2.78163	0.928482		1.36097	3.68979		2.50108	0.230109
	0.086553	4.68907		0.380037	0.202753		0.423811	0.160915		1.17095	1.14572
	1.46842	0.202753		0.168132	0.279993		0.280551	0.125514		0.0815787	0.453781
	1.27044	0.196317		0.129332	1.85857		0.064666	0.160915		0.682475	0.223672
	0.0606866	0.154479		0.168132	0.510102		0.988892	0.238155		0.086553	0.593778
	0.0517328	1.1602		0.306417	0.474701		0.0736198	7.02879		0.181065	0.397461
	2.69508	1.01377		3.43824	0.104595		3.03632	0.154479		0.064666	0.411943
	0.064666	5.17665		0.259659	0.131951		1.5679	2.07581		0.0736198	2.47327
	15.5895	2.47327		0.920247	10.5786		0.064666	0.334704		0.39695	0.769176
	0.527277	0.60826		0.302438	0.223672		2.01261	0.334704		0.0736198	0.202753
	0.138286	0.111032		0.125353	0.111032		1.80567	0.405507		0.10844	1.42571
	0.0686454	0.642053		0.064666	14.5049		0.086553	0.621133		0.134306	0.600214
	0.064666	0.363669		0.0686454	0.292866		0.0775992	2.26408		4.5704	3.79439
	0.773007	0.740211		8.99355	6.72144		0.086553	0.740211		0.984913	9.34919
	0.0686454	0.524584		0.134306	2.80154		2.6523	0.154479		0.103466	0.111032
	0.414857	0.859288		0.142265	0.719292		0.730228	0.196317		4.31969	0.125514
	0.155198	1.04112		0.0994862	0.223672		0.0686454	2.85142		0.138286	2.3204
	0.151219	1.23744		1.64152	0.125514		0.125353	0.104595		0.0815787	0.125514
	0.0477534	0.0691936		0.302438	0.175398		0.811807	0.111032		0.509369	0.474701
	0.337258	0.230109		3.97447	0.111032		0.0686454	0.321831		0.97198	0.154479
	0.173106	1.82317		0.39695	0.196317		0.151219	0.279993		1.02371	2.04684
	0.354171	0.175398		0.0736198	0.181834		0.0686454	0.146433		2.16382	2.34776
	0.427791	0.104595		0.0955067	0.154479		1.65048	3.339		0.164152	0.154479
	0.531256	0.811014		0.0775992	0.146433		0.868514	0.181834		0.0686454	1.38387
	0.311392	1.76041		0.086553	0.286429		3.07611	0.614697		8.36778	0.370105
	0.168132	0.963883		0.440724	0.251028		0.147239	0.650098		0.202952	0.6855
	0.042779	0.083676		0.0955067	0.125514		0.116399	0.942964		0.61383	14.2185
	0.0736198	1.50939		0.0815787	0.55194		1.11027	0.531021		0.164152	0.167352
	0.168132	0.271947		0.0994862	0.593778		0.129332	2.55051		0.0815787	0.55194
	0.0606866	0.217236		3.67999	10.8714		0.0686454	0.160915		0.237772	0.196317
	0.682475	0.915609		1.66341	4.22725		0.086553	0.125514		0.0994862	0.259074
	0.160173	1.02664		0.401924	0.181834		0.173106	0.131951		6.82077	2.02592
	0.0686454	0.907563		0.0736198	0.251028		1.87929	0.104595		0.142265	0.146433
	0.116399	1.96317		0.0686454	0.146433		0.0955067	2.145		0.064666	1.0894
	0.756095	0.55194		0.0905324	0.154479		0.129332	0.706419		0.0905324	0.223672
	7.25752	0.131951		1.57288	0.259074		0.0686454	0.223672		0.302438	0.131951
	1.19682	1.20204		2.44935	0.650098		0.0955067	0.503665		0.514343	1.41766
	0.086553	0.579295		0.228818	0.202753		1.18786	1.72501		0.376058	1.39031
	0.0606866	1.53674		0.302438	2.51511		0.488477	0.230109		0.151219	0.217236
	0.064666	0.355623		0.267618	0.271947		0.116399	1.76041		0.535236	0.677454
	0.0477534	2.66959		0.228818	4.48632		0.384017	2.00501		0.911293	3.87001
	0.129332	0.642053		0.0736198	7.3651		0.129332	0.279993		1.5679	0.376542
	0.042779	0.558376		0.0994862	0.656535		0.224839	0.482746		0.125353	6.53317
	0.0686454	0.125514		0.10844	0.119077		0.0994862	0.447345		0.820761	0.370105
	0.0736198	0.251028		0.134306	0.238155		0.112419	0.671017		8.53591	0.238155
	0.0557122	0.125514		2.08623	0.175398		0.820761	0.146433		0.324325	0.125514
	0.0775992	0.139996		0.608855	1.07652		0.0994862	0.26551		0.345217	0.748257
	0.427791	0.154479		0.0815787	9.83837		1.33013	3.86358		0.267618	0.104595
	0.254685	1.95673		0.0815787	0.119077		0.250705	0.202753		0.418837	0.111032
	0.82474	3.14429		0.384017	0.593778		1.11922	2.46683		0.0905324	1.43215
	1.35202	0.432862		0.0905324	1.18112		0.237772	2.49419		1.55099	0.196317
	0.298459	0.334704		0.363125	0.175398		0.0905324	0.131951		0.566076	1.29215
	0.160173	0.587341		1.03267	0.202753		0.876473	0.650098		0.064666	5.02378
	0.177085	0.600214		0.647655	0.271947		1.40375	0.671017		0.0736198	0.20919
	0.202952	0.936528		0.595922	0.202753		4.10381	0.139996		0.138286	0.119077
	0.298459	0.139996		0.121373	0.160915		0.409883	1.36939		0.43177	0.131951
	0.0606866	0.566422		0.695408	0.698373		0.418837	0.600214		0.0686454	0.125514
	0.181065	0.111032		0.202952	0.119077		0.138286	1.32112		0.0477534	0.355623
	0.0736198	0.0981584		0.376058	0.405507		0.367104	0.111032		0.224839	1.64134
	0.0606866	3.11693		0.0955067	0.572859		0.181065	0.217236		0.557122	2.86429
	0.181065	1.43858		0.0994862	0.167352		3.94363	0.271947		0.643675	0.279993
	0.042779	0.111032		0.0815787	0.119077		0.444703	0.363669		1.59874	1.43858
	0.112419	0.363669		0.164152	0.691936		0.215885	0.104595		0.570056	0.119077
	0.46659	0.823887		1.15305	0.251028		0.173106	0.719292		0.405903	0.202753
	0.0517328	0.405507		0.341238	0.175398		0.54021	2.85142		0.894381	4.2546
	1.03267	1.07652		0.155198	0.244591		2.00863	0.202753		0.846627	0.223672
	0.103466	0.411943		1.71912	1.80225		0.50141	0.104595		0.042779	0.217236
	0.202952	0.922045		0.168132	0.139996		0.492457	4.56195		0.0736198	8.25818
	0.0517328	2.04041		0.10844	0.474701		2.22451	0.125514		0.112419	0.139996
	0.639696	0.111032		0.202952	0.202753		0.0955067	2.64062		0.138286	8.90184
	0.302438	0.181834		0.276572	0.279993		0.160173	0.202753		0.0686454	2.41051
	0.0517328	0.796531		0.064666	0.426426		1.97878	0.873771		0.345217	0.167352
	0.198972	0.307348		0.743162	0.146433		3.81032	0.146433		1.2784	5.72215
	0.181065	0.251028		3.26613	0.146433		0.121373	0.405507		0.116399	1.64134
	0.868514	1.04112		1.79672	0.244591		0.151219	0.20919		0.103466	4.87735
	0.315371	0.376542		0.894381	0.119077		0.129332	3.93438		0.686454	0.160915
	0.272592	0.125514		0.0686454	0.238155		0.232798	0.202753		0.0686454	2.16592
	0.112419	0.181834		0.116399	1.07652		0.064666	3.84266		0.929201	0.139996
	0.785941	2.13857		0.10844	0.474701		0.276572	1.31307		0.272592	4.57
	0.202952	1.21652		0.103466	0.202753		0.215885	0.104595		0.47057	0.307348
	0.405903	0.629179		0.10844	3.77347		0.129332	0.119077		0.064666	0.432862
	0.112419	0.838369		0.173106	0.963883		0.202952	0.313785		2.67817	5.21205
	0.280551	0.0981584		1.55099	0.656535		0.436744	0.259074		2.57868	2.6197
	2.02554	0.321831		0.544189	0.230109		0.164152	0.188271		0.186039	0.279993
	3.39546	0.167352		0.138286	2.07581		1.97878	0.621133		0.0686454	0.238155
	0.228818	0.558376		2.324	0.125514		0.0905324	1.7749		0.660588	0.579295
	0.181065	0.0981584		0.186039	0.111032		0.151219	0.587341		0.198972	5.83479
	0.125353	1.03469		0.332284	0.230109		0.988892	0.167352		0.0905324	0.259074
	1.06649	0.139996		1.34804	0.131951		0.850607	0.175398		0.319351	1.79582
	0.228818	0.111032		0.142265	0.119077		0.0815787	0.671017		0.311392	2.20132
	0.142265	1.87949		0.0686454	0.579295		0.168132	0.397461		0.0775992	0.238155
	0.173106	0.167352		0.47057	0.119077		0.219864	0.131951		1.02769	0.104595
	0.142265	0.769176		0.125353	0.146433		0.0736198	5.44216		3.20544	0.432862
	0.125353	1.67674		0.064666	0.251028		0.0775992	5.78491		0.134306	4.70999
	0.302438	0.0981584		2.53988	0.26551		0.302438	0.89469		0.371083	2.76614
	0.168132	0.111032		0.138286	0.217236		0.263638	0.95101		0.112419	1.81673
	0.769028	0.196317		0.237772	0.223672		0.384017	0.656535		0.647655	0.139996
	2.08224	0.26551		0.112419	0.119077		0.245731	1.86501		0.548169	0.119077
	0.704362	0.111032		0.125353	0.125514		0.164152	0.181834		0.232798	2.54407
	0.164152	0.769176		0.0736198	1.76041		0.206931	0.125514		0.600896	0.698373
	0.600896	0.111032		0.112419	1.73306		0.0905324	0.230109		0.405903	0.313785
	8.84631	0.111032		0.245731	0.907563		0.881447	0.125514		1.1232	1.89397
	0.181065	0.125514		0.0905324	0.111032		0.064666	0.405507		0.0517328	0.510102
	0.121373	0.139996		0.509369	0.384588		2.99752	0.558376		0.042779	0.175398
	0.449678	0.531021		0.190019	0.558376		0.315371	0.160915		0.427791	0.313785
	0.254685	0.531021		0.704362	0.432862		0.630742	0.104595		0.591943	1.57214
	1.3948	0.111032		0.237772	0.26551		0.121373	0.650098		0.198972	0.712855
	0.147239	0.125514		0.440724	0.397461		0.254685	0.139996		0.0477534	0.76113
	0.177085	0.531021		0.116399	0.119077		0.0686454	0.292866		0.907314	0.769176
	8.91197	0.111032		0.0736198	0.259074		9.03732	0.196317		0.548169	0.748257
	0.193998	0.698373		3.12785	0.188271		0.147239	1.72501		0.876473	2.57787
	0.129332	0.349186		0.0994862	0.217236		0.315371	0.160915		0.975959	0.238155
	2.89405	0.167352		0.280551	0.482746		0.160173	2.64062		0.190019	2.41051
	0.228818	0.111032		0.0955067	5.91847		0.0775992	0.175398		0.198972	0.223672
	0.190019	0.587341		1.52015	0.482746		0.582989	0.125514		0.0517328	0.167352
	1.62859	0.111032		0.47057	0.376542		0.112419	2.61327		1.34804	0.20919
	0.211905	0.251028		0.388991	0.160915		0.237772	0.852852		0.591943	0.60826
	0.202952	1.07652		0.064666	0.957447		0.0736198	0.238155		0.241751	0.503665
	8.82542	1.21652		0.232798	0.125514		0.350191	0.111032		0.311392	2.70338
	3.84017	0.139996		0.833694	0.782049		0.0955067	0.154479		1.14907	0.426426
	0.514343	0.139996		0.496436	0.119077		0.0736198	2.92705		2.07329	1.16664
	0.259659	0.740211		0.0686454	0.160915		0.0736198	1.66226		0.833694	4.07277
	4.37142	0.349186		0.155198	1.36295		0.0736198	0.125514		0.0736198	0.217236
	3.19251	0.419989		0.181065	0.865725		0.617809	2.27052		2.11209	0.196317
	0.116399	0.238155		0.946114	0.859288		0.462611	0.154479		0.0686454	0.196317
	24.9034	0.712855		0.276572	0.111032		0.134306	0.635616		0.147239	0.370105
	4.63904	0.614697		0.259659	0.139996		0.39297	1.53674		0.042779	0.160915
	0.186039	0.111032		0.380037	0.119077		0.168132	0.621133		1.61168	0.447345
	0.177085	0.20919		2.52695	0.167352		0.276572	0.111032		0.548169	0.370105
	0.151219	0.349186		0.129332	0.55194		0.50539	5.35205		0.548169	0.34275
	0.337258	0.111032		0.527277	1.22296		0.160173	0.119077		0.889406	0.131951
	2.44935	0.111032		0.116399	0.432862		0.328304	8.90828		0.0775992	0.328267
	0.574035	0.238155		1.30028	0.181834		0.0686454	0.146433		0.0775992	0.20919
	0.155198	0.111032		0.147239	0.271947		3.11491	0.111032		0.444703	0.119077
	13.1929	0.376542		0.409883	1.68318		0.0686454	0.796531		1.74996	8.46093
	2.37175	0.125514		0.738187	1.71214		0.0775992	0.748257		0.0686454	0.238155
	1.44752	0.125514		0.116399	0.217236		0.198972	0.328267		0.738187	0.139996
	0.423811	0.125514		0.0686454	0.614697		0.0775992	0.706419		0.811807	1.08296
	0.121373	1.07652		0.833694	0.706419		0.112419	0.886644		0.151219	0.307348
	0.514343	0.111032		0.125353	0.139996		0.138286	2.01305		0.514343	1.04756
	0.920247	0.20919		0.064666	1.57214		0.103466	0.292866		0.10844	0.238155
	0.168132	0.489183		4.92059	0.558376		0.064666	0.349186		1.87034	1.71858
	1.30028	0.181834		3.8143	0.188271		0.267618	5.45664		0.704362	0.196317
	0.206931	0.223672		0.134306	3.54175		3.20544	4.0599		0.332284	0.146433
	0.232798	0.181834		0.39297	0.384588		0.0775992	1.48203		0.112419	0.844806
	0.337258	0.26551		0.173106	0.650098		0.0775992	7.41981		0.0815787	0.20919
	0.112419	0.712855		0.155198	0.131951		0.125353	0.259074		0.042779	0.20919
	0.206931	0.0981584		0.147239	1.10388		0.10844	0.160915		0.280551	0.104595
	0.129332	0.125514		0.0736198	2.17236		0.125353	0.196317		0.401924	0.131951
	0.232798	0.447345		0.409883	0.202753		0.10844	0.104595		0.0686454	0.131951
	0.121373	0.167352		0.708341	0.34275		2.87217	20.2271		0.0477534	0.537458
	0.181065	0.125514		0.85956	0.175398		0.0955067	1.72501		0.0955067	0.119077
	0.125353	0.363669		0.103466	0.181834		0.121373	0.223672		0.0517328	0.238155
	2.52695	0.111032		0.591943	0.984802		0.0736198	0.349186		0.064666	0.328267
	1.1232	0.111032		0.0686454	0.154479		1.23562	0.119077		0.418837	0.154479
	0.186039	0.167352		0.103466	0.984802		0.121373	0.363669		0.193998	0.217236
	4.24209	0.167352		0.0955067	0.139996		1.89621	0.217236		0.193998	1.71214
	0.138286	0.823887		1.24855	0.131951		0.138286	0.259074		0.509369	0.286429
	0.462611	0.154479		0.0775992	0.154479		0.263638	0.188271		1.69723	4.18541
	0.151219	0.482746		0.514343	0.461827		0.0686454	0.146433		11.7453	0.259074
	0.155198	0.196317		2.33693	1.04756		0.190019	0.119077		0.245731	0.244591
	0.121373	0.6855		0.50141	0.146433		2.59659	0.104595		0.042779	3.59807
	0.138286	0.251028		4.40624	0.146433		0.086553	0.217236		0.0736198	0.104595
	0.285525	0.740211		0.10844	0.196317		0.587963	0.119077		0.142265	0.271947
	0.134306	0.125514		0.259659	0.119077		1.36893	0.698373		0.086553	0.125514
	0.164152	0.279993		0.245731	8.21634		1.74101	0.131951		0.0686454	0.167352
	1.01476	0.111032		0.245731	0.537458		0.272592	0.405507		0.0606866	6.96603
	1.162	0.489183		0.245731	0.175398		0.794894	1.16664		0.50141	0.811014
	0.151219	0.111032		0.0736198	0.286429		8.28521	0.217236		1.10629	0.34275
	0.147239	0.20919		3.62826	0.111032		0.147239	0.230109		0.0905324	0.349186
	0.418837	0.125514		0.634722	0.125514		0.324325	0.104595		0.0775992	2.01949
	1.12718	0.125514		2.01758	0.125514		0.064666	1.0894		0.134306	2.57143
	0.147239	0.125514		1.5291	0.279993		0.0686454	0.104595		0.0557122	4.67459
	1.79672	0.0981584		0.160173	0.119077		0.0775992	0.790095		0.0815787	3.60451
	2.30708	0.865725		0.173106	6.43501		0.449678	1.07652		0.0905324	0.244591
	0.332284	0.217236		0.760074	1.02664		0.168132	3.33256		0.876473	0.587341
	0.121373	0.196317		0.0686454	0.244591		2.01758	0.119077		0.211905	0.104595
	0.147239	0.531021		0.193998	0.167352		0.531256	0.271947		1.96585	0.95101
	2.10413	0.223672		1.06251	0.188271		1.33908	0.223672		0.0815787	15.5042
	0.215885	0.811014		0.332284	0.271947		0.121373	3.38244		1.29631	2.52154
	0.206931	1.02664		0.0994862	0.271947		4.22916	0.175398		0.103466	0.363669
	0.10844	0.196317		0.548169	1.23744		0.0815787	0.104595		0.634722	0.181834
	0.306417	0.838369		0.202952	0.167352		2.06434	1.37583		0.129332	0.111032
	0.138286	0.859288		0.566076	12.8217		0.289505	0.34275		0.0686454	0.104595
	0.181065	0.0981584		0.0815787	0.104595		3.45118	0.131951		0.0994862	0.635616
	0.151219	0.154479		0.747141	0.125514		0.0905324	0.160915		1.14509	0.642053
	0.151219	0.740211		0.160173	0.292866		0.147239	0.271947		1.17493	0.125514
	0.311392	0.978366		0.0905324	2.47327		1.93501	0.104595		1.3948	0.188271
	0.112419	0.0981584		0.345217	0.238155		0.245731	1.6703		0.202952	0.461827
	0.142265	0.251028		0.112419	0.349186		0.0686454	2.54407		1.8017	0.119077
	0.125353	0.587341		0.155198	0.119077		0.311392	0.286429		0.0557122	0.196317
	0.190019	0.20919		0.678496	0.160915		0.190019	0.370105		0.232798	0.558376
	0.617809	0.558376		0.0686454	0.139996		1.19682	0.286429		0.341238	0.154479
	0.125353	0.363669		0.0905324	2.01949		0.142265	0.259074		0.350191	1.52387
	0.376058	0.167352		0.202952	1.33399		0.086553	0.125514		0.151219	0.131951
	0.177085	0.139996		4.79523	0.286429		0.561102	0.370105		0.634722	0.593778
	3.92672	0.154479		0.0815787	0.119077		0.462611	0.104595		0.50539	5.26837
	0.112419	0.139996		0.531256	1.43215		0.186039	0.119077		0.160173	0.349186
	0.215885	0.181834		0.405903	0.397461		0.10844	0.139996		0.405903	0.355623
	0.125353	0.963883		0.0955067	0.131951		0.064666	0.202753		6.00399	0.131951
	14.2424	0.0981584		0.587963	0.111032		0.064666	0.244591		0.773007	0.104595
	0.328304	0.334704		0.177085	0.111032		0.280551	0.146433		0.734208	0.125514
	1.5679	0.769176		0.103466	0.119077		0.138286	0.125514		0.0994862	10.0266
	0.116399	0.0981584		2.07827	0.238155		0.587963	0.104595		0.0905324	0.397461
	1.50324	0.167352		0.190019	0.566422		0.272592	0.706419		0.177085	2.83694
	0.311392	0.139996		0.198972	0.131951		0.064666	0.125514		0.535236	0.111032
	1.6455	0.111032		0.147239	0.292866		3.33478	0.370105		0.553143	3.10889
	0.228818	0.769176		0.0905324	0.307348		0.0686454	0.125514		1.17493	0.698373
	0.173106	0.769176		0.142265	0.125514		0.103466	0.461827		0.354171	0.111032
	0.190019	0.503665		0.155198	0.503665		0.0905324	2.32684		1.14907	0.802968
	0.319351	0.139996		0.116399	0.251028		2.48417	0.384588		0.574035	0.489183
	1.25751	0.811014		0.151219	2.16592		3.14078	0.447345		0.0557122	0.196317
	0.652629	0.321831		0.0815787	25.1945		2.03051	0.397461		0.211905	0.160915
	3.81032	0.432862		0.142265	8.97908		0.263638	0.160915		1.19184	0.111032
	2.58764	0.167352		0.570056	2.7951		0.0994862	0.125514		0.293484	1.78938
	0.134306	0.629179		0.086553	0.321831		0.656609	0.775612		5.41702	1.45307
	0.129332	0.642053		0.112419	0.796531		0.0994862	0.111032		0.0606866	0.202753
	8.19468	0.782049		0.190019	0.558376		0.492457	0.104595		0.224839	0.642053
	1.11027	0.419989		0.0905324	0.286429		3.27409	0.334704		2.47919	5.77847
	0.116399	0.419989		0.151219	1.14572		0.129332	0.907563		2.57072	0.111032
	1.56392	1.78938		0.263638	0.125514		0.0994862	0.160915		0.0736198	1.43858
	0.232798	0.223672		0.215885	0.223672		0.151219	0.524584		0.245731	2.34776
	2.66523	0.545503		0.125353	0.971929		3.26613	0.196317		0.10844	0.26551
	0.147239	0.238155		0.781961	0.119077		0.376058	0.223672		1.3739	0.111032
	0.626763	0.89469		0.0775992	1.71214		2.60057	0.154479		1.04062	0.188271
	5.04096	0.907563		1.07544	0.146433		2.66126	0.292866		0.112419	0.370105
	0.237772	0.6855		1.46842	1.38387		7.14908	0.131951		0.064666	0.119077
	0.272592	1.67674		0.112419	0.154479		1.44752	0.957447		0.449678	0.782049
	0.462611	0.139996		4.48782	0.579295		0.103466	0.125514		3.15371	1.54479
	5.93534	0.154479		4.16847	0.405507		0.193998	0.838369		0.0994862	0.349186
	0.10844	0.223672		1.61963	0.20919		0.177085	0.125514		1.39977	0.60826
	0.181065	0.587341		0.198972	0.188271		0.138286	0.244591		0.337258	1.48847
	0.582989	0.125514		0.206931	0.545503		0.756095	1.01377		0.492457	1.01377
	0.160173	0.181834		0.337258	0.111032		0.942134	0.238155		0.0686454	0.286429
	0.138286	0.545503		0.0686454	1.11032		0.134306	0.154479		0.289505	1.0556
	3.22634	0.196317		0.064666	0.175398		0.414857	0.167352		0.647655	1.76041
	0.245731	0.167352		0.0736198	0.740211		1.14509	0.886644		1.04958	0.175398
	3.58548	0.376542		0.064666	0.125514		0.811807	0.642053		3.39546	1.03469
	0.10844	0.489183		0.121373	1.41766		1.32217	0.545503		0.228818	5.02378
	0.138286	0.223672		0.190019	0.26551		0.0955067	1.44663		0.086553	0.461827
	0.743162	0.823887		0.0775992	0.104595		4.454	0.111032		0.125353	6.67316
	2.73885	0.167352		0.116399	0.217236		0.453657	0.175398		0.0736198	0.196317
	0.116399	0.223672		0.0686454	0.391024		0.134306	0.440908		0.086553	6.0649
	0.147239	0.181834		0.116399	0.167352		2.10413	1.24388		0.116399	13.0872
	0.367104	0.125514		0.112419	1.66226		0.134306	3.45164		0.190019	0.139996
	16.1128	0.698373		5.35236	3.73163		0.064666	0.279993		9.96951	0.531021
	0.121373	0.391024		0.250705	0.160915		0.514343	0.181834		0.639696	0.251028
	5.0927	0.712855		0.725254	0.181834		0.254685	0.111032		0.164152	0.796531
	0.116399	0.125514		0.151219	0.119077		0.134306	2.05489		0.129332	1.53674
	0.134306	0.125514		1.81463	2.87878		0.587963	0.6855		0.306417	1.27123
	0.289505	0.181834		0.160173	1.90685		0.198972	2.52959		0.064666	0.531021
	0.10844	0.139996		0.064666	0.111032		0.634722	0.292866		0.0686454	0.119077
	5.79706	0.125514		1.77085	2.85142		0.0686454	1.4595		0.202952	2.50062
	0.155198	0.587341		0.186039	0.244591		0.984913	0.349186		1.5679	0.104595
	2.92887	0.662971		0.50539	3.29716		0.193998	0.175398		0.0606866	0.81745
	4.09485	0.712855		0.173106	1.51582		0.298459	2.9351		0.0517328	14.4631
	0.837673	0.698373		0.0775992	0.391024		2.26829	3.62703		4.9375	0.468264
	6.60489	0.447345		0.138286	0.397461		11.7493	0.119077		0.267618	1.41123
	0.121373	0.139996		0.147239	1.19399		0.0736198	3.63347		0.193998	3.29716
	0.125353	0.489183		4.78628	0.26551		0.0955067	2.22224		0.0517328	1.87949
	0.134306	0.111032		0.112419	0.104595		0.0955067	0.111032		0.193998	4.19185
	1.88725	0.139996		0.138286	0.691936		0.50539	1.08296		0.0775992	1.3002
	0.121373	0.621133		0.0815787	1.40479		1.40375	0.125514		0.725254	0.537458
	3.84017	0.95101		0.0686454	2.11765		0.160173	0.328267		0.0775992	0.111032
	0.147239	0.474701		3.4084	0.202753		2.18173	0.587341		0.595922	0.271947
	0.440724	0.154479		0.0775992	0.167352		0.872494	0.119077		0.686454	0.880207
	4.70868	0.712855		0.142265	0.111032		1.38684	0.286429		11.7752	0.244591
	1.42166	0.119077		0.190019	0.524584		0.0905324	0.26551		0.142265	2.6551
	0.401924	0.111032		0.134306	0.160915		0.134306	2.76614		0.371083	0.516538
	0.531256	0.419989		0.0686454	0.125514		0.380037	0.376542		0.042779	0.363669
	5.36927	0.516538		0.280551	0.34275		0.064666	0.230109		0.232798	0.516538
	4.52264	0.453781		0.116399	0.712855		1.04062	0.230109		0.868514	0.992848
	0.134306	0.558376		1.40872	0.202753		0.129332	0.440908		0.086553	2.06133
	7.08441	0.671017		6.60489	0.271947		0.142265	3.71071		4.62213	0.334704
	0.116399	0.656535		0.086553	1.29215		0.660588	0.307348		0.0557122	0.146433
	3.04129	0.251028		0.112419	1.83122		0.975959	0.823887		0.0815787	0.223672
	0.285525	0.461827		0.10844	0.621133		3.46908	1.13928		1.00183	0.733774
	1.11424	0.167352		3.50788	0.286429		0.50539	0.300912		0.0775992	20.6535
	0.164152	1.30663		0.0736198	0.104595		0.0815787	0.20919		0.630742	0.146433
	0.151219	0.447345		0.198972	0.537458		1.0844	0.104595		0.811807	0.936528
	2.01758	0.411943		0.173106	1.36295		0.064666	0.125514		0.0517328	0.376542
	0.129332	0.0981584		0.228818	2.09673		1.15305	0.901126		1.01973	2.48775
	0.112419	0.503665		0.125353	0.880207		0.181065	0.154479		0.142265	3.41623
	0.142265	0.321831		0.177085	0.271947		0.245731	0.971929		6.4278	0.196317
	0.263638	0.629179		0.064666	0.244591		0.591943	0.139996		0.064666	0.384588
	0.112419	0.111032		1.08042	0.175398		0.202952	1.93581		0.0775992	4.65367
	0.582989	0.251028		0.186039	3.68979		1.27044	1.50939		0.0557122	3.05256
	0.302438	0.391024		0.267618	0.167352		6.19003	0.440908		3.34373	2.51511
	1.07544	0.474701		0.134306	0.131951		1.48632	1.35491		0.064666	0.677454
	0.245731	0.111032		0.332284	1.68318		0.181065	0.196317		6.73422	0.244591
	0.319351	0.20919		4.55348	2.24316		0.103466	0.26551		0.042779	0.181834
	0.142265	0.139996		0.0955067	0.411943		1.13215	0.125514		0.0736198	1.66226
	0.134306	0.629179		0.151219	0.489183		2.29415	0.292866		0.0517328	0.503665
	0.219864	0.154479		1.19682	2.34132		0.50141	0.167352		0.0905324	2.47971
	0.665562	0.26551		0.086553	2.82246		2.33295	0.196317		0.177085	0.886644
	0.168132	0.146433		0.10844	0.307348		0.811807	2.145		0.042779	3.77347
	2.67419	0.202753		0.064666	0.474701		0.0994862	4.58287		0.332284	3.07348
	10.5704	0.181834		0.103466	1.27123		0.475544	0.230109		0.186039	6.715
	0.285525	0.650098		0.0815787	0.621133		0.293484	1.61398		0.0606866	1.43858
	0.794894	0.111032		0.0736198	1.16664		0.0815787	0.510102		7.35203	0.154479
	0.125353	0.139996		0.285525	1.7395		0.341238	0.244591		0.0557122	0.223672
	0.553143	0.125514		3.95656	1.41766		0.0686454	0.230109		0.0815787	3.03165
	1.95689	0.154479		0.125353	0.217236		1.03267	0.125514		0.190019	3.4098
	5.9831	0.238155		0.202952	0.76113		0.142265	0.300912		0.665562	0.600214
	1.91411	0.474701		0.206931	0.566422		1.21771	0.131951		0.0517328	0.999285
	0.116399	0.175398		0.0686454	1.26479		1.15305	0.244591		0.103466	0.251028
	2.12105	0.656535		0.0905324	0.104595		0.514343	0.196317		0.440724	0.397461
	0.306417	0.286429		0.177085	0.6855		1.53308	0.503665		0.0815787	0.292866
	0.302438	0.154479		0.488477	0.119077		1.46444	2.98337		0.064666	1.0556
	0.151219	0.698373		0.206931	0.656535		0.0994862	0.175398		0.0557122	0.154479
	3.08009	1.11032		0.86354	1.06204		0.324325	0.154479		0.0994862	0.167352
	0.902339	0.26551		0.10844	2.95602		0.367104	0.230109		1.14011	0.706419
	0.134306	2.04041		0.086553	0.167352		0.10844	1.52387		0.0517328	0.104595
	0.121373	0.419989		0.155198	0.411943		0.064666	0.671017		2.77765	0.111032
	0.160173	0.196317		1.03267	2.34776		4.17245	1.04112		0.134306	0.286429
	2.78163	0.146433		0.298459	0.537458		0.0994862	0.503665		3.76655	0.188271
	0.10844	1.10388		0.086553	1.39031		1.93103	0.181834		0.10844	0.217236
	0.219864	0.223672		0.285525	0.300912		1.29631	2.01949		0.134306	0.251028
	0.259659	0.0981584		0.811807	0.175398		0.224839	0.60826		0.125353	1.79582
	2.93285	0.971929		0.302438	0.139996		0.332284	0.167352		0.0815787	3.57715
	6.78595	0.419989		0.064666	0.650098		0.064666	0.34275		0.345217	1.45307
	0.566076	0.936528		0.198972	0.468264		2.68712	0.160915		0.064666	5.46308
	2.89903	0.223672		0.846627	0.468264		1.18389	0.139996		0.0477534	0.376542
	0.479523	0.20919		0.0686454	0.349186		0.354171	0.662971		0.0686454	0.119077
	4.07794	0.139996		0.147239	0.230109		0.401924	0.223672		0.0557122	0.376542
	0.181065	0.727338		0.245731	1.41766		0.190019	0.104595		0.367104	0.516538
	2.58366	0.167352		0.147239	0.271947		0.103466	0.796531		0.177085	2.94797
	0.345217	0.238155		0.669542	1.11836		2.13796	0.202753		0.0557122	1.94225
	0.488477	0.419989		0.086553	0.936528		0.61383	0.279993		0.042779	0.489183
	1.24457	0.279993		0.276572	0.104595		0.116399	0.131951		0.82474	2.17236
	0.376058	0.545503		0.232798	0.999285		0.064666	0.259074		0.086553	0.104595
	0.306417	0.531021		0.232798	0.119077		0.816781	0.355623		0.0815787	0.217236
	2.89007	0.376542		1.71514	0.154479		1.75792	0.614697		10.7385	5.33113
	0.10844	0.223672		0.0775992	0.230109		0.855581	0.167352		5.70155	1.78938
	2.31504	0.426426		0.254685	0.593778		1.55099	0.104595		0.734208	0.271947
	0.190019	0.230109		1.78379	0.650098		0.315371	0.146433		0.10844	0.405507
	0.773007	0.754693		0.0775992	1.28571		1.03665	0.376542		0.462611	0.119077
	0.129332	0.244591		0.237772	0.34275		8.81646	0.978366		0.042779	4.00357
	0.190019	1.34847		2.86421	0.230109		1.42166	0.363669		0.929201	1.33399
	0.138286	0.104595		0.173106	0.698373		0.639696	4.42356		0.0517328	1.59306
	4.7823	0.125514		0.064666	0.802968		3.6979	0.489183		5.84879	0.111032
	5.22302	0.238155		0.064666	1.1248		0.064666	0.328267		7.60273	0.125514
	0.574035	0.0691936		0.064666	0.181834		0.0686454	0.188271		1.01078	0.160915
	0.147239	0.083676		0.535236	0.313785		0.695408	0.838369		0.129332	0.307348
	0.142265	1.35491		0.0775992	0.566422		1.27044	0.125514		0.134306	0.292866
	0.337258	0.292866		0.164152	0.300912		1.78379	0.125514		0.0477534	3.4452
	0.138286	0.083676		1.26546	0.131951		0.984913	0.131951		0.064666	1.42571
	1.54204	6.93063		0.211905	0.104595		1.66739	0.131951		0.0477534	1.03469
	0.193998	0.083676		3.00647	0.217236		0.263638	3.48704		0.267618	0.259074
	2.31504	0.131951		0.0815787	0.440908		0.0736198	2.85142		0.0557122	0.244591
	4.08192	0.384588		0.134306	0.244591		0.647655	0.271947		0.206931	0.104595
	0.444703	0.146433		0.0736198	0.55194		0.669542	0.160915		5.32649	3.47899
	0.582989	0.196317		0.0686454	1.48847		0.129332	0.321831		0.121373	0.259074
	0.409883	0.202753		3.40442	0.60826		1.93998	0.181834		1.52015	1.99052
	0.202952	0.119077		0.160173	0.376542		1.94794	0.355623		0.142265	2.54407
	0.116399	11.8224		2.324	0.139996		3.75859	0.154479		0.0736198	0.139996
	2.97663	0.0772394		0.173106	0.886644		0.138286	0.139996		0.302438	0.217236
	2.6523	0.181834		0.181065	0.426426		0.376058	0.572859		0.0775992	0.230109
	2.25933	0.0981584		0.177085	0.175398		0.121373	0.125514		0.0606866	0.202753
	0.0955067	0.196317		0.794894	0.146433		0.0736198	0.160915		0.164152	0.217236
	0.695408	0.635616		0.734208	0.566422		0.224839	0.321831		0.164152	0.139996
	0.206931	0.0901126		0.43177	0.432862		0.582989	0.230109		0.142265	0.181834
	0.245731	1.48203		0.138286	0.181834		0.138286	0.111032		0.0955067	5.00286
	1.4903	0.217236		0.147239	0.196317		0.0905324	1.79582		0.259659	0.104595
	0.151219	0.461827		0.155198	0.196317		0.190019	2.11765		0.155198	11.3124
	0.47057	0.0691936		0.0736198	0.146433		0.916268	0.125514		0.363125	0.426426
	0.177085	0.167352		0.103466	0.146433		0.423811	0.426426		0.0815787	0.154479
	0.587963	1.23744		3.09302	0.397461		5.30062	0.202753		5.83188	0.495619
	1.17493	0.111032		1.18786	0.727338		1.65048	0.119077		0.202952	0.104595
	1.12718	0.0981584		0.0775992	0.196317		0.219864	0.411943		0.0606866	1.71214
	0.509369	0.181834		2.36678	0.440908		0.193998	0.321831		0.0686454	0.139996
	6.95906	0.131951		0.181065	0.139996		0.112419	0.279993		0.61383	0.259074
	2.14691	0.922045		4.52662	0.391024		0.276572	0.432862		0.0815787	0.957447
	0.380037	0.20919		0.0686454	0.125514		2.42746	0.259074		0.272592	0.111032
	0.418837	0.125514		0.202952	0.300912		0.186039	0.146433		0.380037	0.572859
	7.00184	0.376542		0.418837	0.671017		0.125353	0.223672		0.116399	0.188271
	0.0905324	0.0901126		0.0905324	0.139996		1.77085	0.146433		0.916268	1.44663
	0.116399	0.0691936		0.064666	0.635616		0.634722	0.196317		2.16382	9.74665
	1.30924	0.125514		0.193998	0.217236		3.76257	1.37583		1.08042	0.629179
	0.086553	1.07652		0.151219	0.300912		0.086553	0.139996		0.064666	0.111032
	0.717295	0.188271		0.462611	0.146433		0.324325	0.650098		0.129332	0.482746
	0.121373	0.259074		0.0994862	0.111032		0.103466	1.52387		0.147239	0.621133
	0.0955067	1.84409		0.0955067	0.26551		0.418837	2.03397		0.0686454	0.942964
	0.43177	3.17164		0.215885	0.111032		0.280551	0.300912		1.77085	0.202753
	0.328304	0.0901126		0.0815787	0.292866		0.760074	0.859288		0.151219	1.66226
	0.224839	0.167352		0.0815787	2.29143		0.634722	0.125514		0.138286	2.50867
	4.84697	0.0691936		0.405903	0.223672		0.0815787	0.125514		0.0477534	1.09744
	0.202952	0.489183		0.0736198	0.566422		0.285525	0.432862		0.354171	0.175398
	0.254685	0.0901126		0.151219	0.111032		7.91412	0.503665		0.147239	0.217236
	0.193998	3.339		0.177085	0.468264		0.0775992	0.230109		0.695408	0.978366
	0.193998	0.26551		0.116399	0.154479		0.177085	0.131951		1.28735	1.5995
	3.52877	0.131951		0.215885	0.901126		0.332284	0.181834		4.37142	1.06204
	0.10844	1.01377		0.151219	0.104595		1.74499	0.719292		0.479523	1.44663
	1.18389	0.083676		0.064666	0.146433		0.125353	0.238155		0.0955067	0.405507
	2.84232	0.0691936		0.39695	0.614697		0.0686454	0.125514		0.475544	1.06848
	0.630742	0.0901126		0.064666	0.251028		0.134306	0.286429		6.2726	0.217236
	1.58979	0.600214		1.48135	0.119077		9.68	0.181834		0.522302	0.802968
	0.0905324	0.119077		0.10844	0.125514		0.160173	0.957447		0.0557122	0.131951
	0.181065	0.936528		0.198972	0.146433		0.0815787	0.139996		0.579009	0.251028
	0.0955067	0.111032		0.0686454	0.419989		3.14874	3.31808		0.103466	1.56571
	0.147239	1.76041		4.14658	2.20132		0.785941	0.719292		0.582989	1.09744
	2.37573	0.083676		0.311392	0.432862		7.73207	0.160915		0.211905	0.181834
	0.855581	0.104595		0.306417	0.251028		0.103466	3.8491		0.790915	0.111032
	1.27442	0.0981584		0.341238	0.20919		0.0686454	1.96317		0.064666	0.600214
	0.496436	0.0901126		0.064666	1.27123		0.457636	0.146433		0.566076	0.537458
	0.147239	0.706419		0.103466	3.15877		0.0775992	0.26551		0.086553	0.259074
	0.276572	0.104595		1.95291	0.677454		0.315371	0.363669		0.237772	0.334704
	0.134306	0.083676		0.086553	1.55122		0.0736198	0.154479		0.0736198	0.238155
	0.121373	3.34704		0.781961	0.754693		0.0736198	0.104595		0.177085	0.146433
	1.15305	0.880207		0.186039	0.279993		0.125353	0.706419		0.289505	0.901126
	0.457636	2.27856		0.0815787	2.77418		0.259659	0.384588		0.328304	7.05614
	11.3951	0.119077		0.206931	0.34275		0.717295	0.196317		0.10844	1.52387
	0.600896	0.614697		0.125353	1.28571		0.259659	0.111032		5.42995	1.27928
	1.05853	0.167352		0.086553	2.08224		0.064666	0.370105		0.553143	1.4595
	0.086553	7.44073		0.376058	0.251028		0.39297	0.104595		1.14011	0.865725
	0.811807	0.131951		0.0686454	0.279993		0.125353	0.292866		0.0517328	0.831933
	0.129332	2.67602		0.0905324	0.844806		0.0815787	0.259074		0.765049	0.181834
	1.17095	0.0691936		0.064666	0.495619		0.0736198	0.119077		0.0517328	1.69766
	0.10844	0.587341		0.086553	0.230109		0.289505	0.370105		0.241751	0.328267
	0.219864	0.083676		0.211905	0.432862		0.872494	1.6349		0.591943	2.61327
	0.112419	0.104595		0.595922	1.87305		2.29415	0.363669		0.042779	1.39031
	0.643675	0.355623		1.46046	9.60665		0.186039	0.292866		0.0477534	0.572859
	0.138286	0.0772394		0.198972	2.91418		2.00465	0.286429		0.0606866	0.230109
	5.15736	0.0772394		0.134306	0.131951		0.0994862	1.03469		0.988892	0.901126
	1.39977	0.621133		0.0775992	1.52387		0.272592	0.397461		0.328304	0.712855
	1.26546	0.167352		0.0905324	0.188271		0.112419	0.593778		0.0606866	1.11032
	0.138286	2.32684		1.43857	0.188271		0.064666	2.35419		1.57686	2.71786
	0.816781	0.181834		0.125353	0.181834		1.55497	0.60826		0.820761	0.125514
	19.9748	0.188271		0.367104	0.119077		11.1663	0.349186		0.0736198	0.154479
	0.811807	0.0772394		0.064666	0.160915		3.12785	0.447345		0.121373	0.321831
	0.769028	0.259074		0.103466	0.160915		0.193998	0.119077		0.173106	0.391024
	0.280551	0.154479		0.193998	0.545503		0.168132	0.104595		0.0905324	4.91114
	0.337258	0.146433		3.11491	0.131951		0.086553	0.167352		0.193998	0.334704
	0.112419	0.397461		0.0775992	0.453781		0.142265	0.154479		0.272592	0.635616
	2.17676	0.104595		2.96369	0.300912		1.11424	1.16664		0.147239	0.447345
	0.134306	0.376542		0.116399	0.831933		0.0736198	0.154479		0.250705	0.146433
	0.557122	0.131951		0.155198	0.196317		0.142265	0.579295		0.803848	0.60826
	0.10844	0.271947		0.121373	0.111032		0.193998	0.411943		0.582989	1.90041
	0.293484	0.083676		0.138286	0.119077		0.129332	2.31235		0.173106	0.34275
	0.206931	0.0772394		0.147239	0.131951		0.086553	0.642053		0.457636	0.516538
	1.14907	5.06562		0.548169	0.259074		0.0775992	0.119077		1.3948	0.175398
	0.0955067	0.160915		1.70221	0.453781		2.79954	0.706419		0.10844	0.223672
	4.75146	2.02592		0.129332	0.131951		0.086553	0.125514		0.380037	3.22796
	0.211905	0.139996		0.902339	0.111032		0.617809	5.39388		0.134306	2.39603
	0.401924	0.104595		0.064666	2.64867		0.518323	2.87234		1.21373	0.6855
	1.99171	0.083676		0.0905324	0.196317		2.73488	0.251028		2.2076	0.125514
	0.155198	0.083676		0.103466	0.426426		0.975959	1.58663		0.151219	13.0454
	0.647655	0.131951		0.0736198	0.426426		0.0736198	2.29143		1.78379	0.503665
	0.173106	0.349186		0.0994862	0.188271		10.4749	0.482746		0.0557122	0.125514
	0.302438	0.167352		0.086553	0.34275		0.112419	0.181834		0.773007	0.125514
	0.315371	0.0981584		0.190019	0.188271		0.384017	2.40408		0.39297	0.223672
	0.134306	0.175398		0.168132	0.196317		0.85956	0.823887		0.0606866	0.405507
	0.267618	9.6147		0.263638	1.46755		0.405903	3.59163		0.0477534	1.48847
	0.968	0.405507		0.756095	0.880207		0.211905	1.8103		1.65048	1.06848
	0.665562	0.432862		0.121373	0.181834		0.10844	0.503665		0.202952	0.321831
	0.224839	1.01377		0.10844	0.321831		1.26148	0.349186		0.302438	0.901126
	0.151219	0.139996		0.121373	1.58663		0.064666	0.217236		0.211905	0.510102
	1.50324	0.0981584		0.829715	0.160915		0.138286	0.279993		1.01078	0.244591
	0.168132	0.26551		0.241751	0.146433		0.462611	0.936528		0.112419	7.78991
	12.4577	0.196317		0.064666	0.167352		0.215885	0.139996		1.33013	0.95101
	0.0815787	1.39675		0.112419	0.139996		0.734208	0.558376		0.514343	0.503665
	0.164152	0.865725		0.086553	0.482746		0.0905324	0.230109		0.574035	0.370105
	0.160173	0.20919		0.298459	0.111032		0.0686454	0.495619		0.0905324	0.104595
	0.522302	0.0691936		0.263638	0.384588		0.61383	1.71858		0.064666	1.76846
	0.142265	0.0901126		0.121373	11.7597		0.600896	0.629179		1.03665	0.244591
	4.0471	2.78706		0.064666	0.300912		0.47057	0.196317		0.0477534	0.230109
	0.535236	1.90041		0.121373	0.26551		0.237772	0.593778		0.0686454	5.15573
	1.65446	0.0772394		0.35815	0.202753		0.0905324	0.671017		0.617809	0.259074
	0.245731	0.196317		5.80104	0.104595		2.29813	0.202753		0.337258	0.223672
	0.652629	0.175398		0.193998	6.05846		0.086553	1.64938		0.488477	0.111032
	0.181065	0.111032		0.0815787	0.251028		0.591943	0.349186		0.173106	0.355623
	0.0557122	0.0901126		3.14078	0.131951		1.5679	0.411943		0.042779	0.593778
	0.376058	3.01073		0.0905324	0.81745		0.0736198	1.48847		0.0557122	0.384588
	0.444703	0.154479		0.103466	2.2142		0.219864	0.202753		1.54601	0.279993
	3.45118	0.0772394		0.121373	0.146433		0.0905324	1.85857		0.232798	2.01949
	0.0955067	0.0772394		0.656609	0.223672		0.142265	0.468264		0.544189	1.81673
	0.781961	0.26551		0.0994862	0.251028		0.0686454	3.05256		0.0905324	0.6855
	0.190019	2.58591		0.0905324	0.363669		0.272592	1.50295		1.22269	0.313785
	0.0686454	2.11765		0.206931	0.89469		0.186039	0.313785		0.134306	0.217236
	0.0905324	0.279993		0.160173	0.313785		0.116399	1.27123		0.0477534	0.292866
	0.042779	0.111032		0.228818	0.271947		0.579009	0.238155		0.121373	5.0801
	0.457636	0.139996		0.0736198	0.26551		1.27044	0.104595		0.367104	1.89397
	0.125353	0.125514		0.0775992	0.131951		0.371083	0.671017		1.0844	6.63776
	2.12502	0.083676		1.93103	0.217236		0.177085	0.503665		3.81828	0.111032
	0.112419	1.42571		0.206931	0.510102		0.401924	0.167352		0.634722	0.139996
	1.03665	0.0772394		0.652629	0.125514		0.241751	0.447345		0.712321	0.859288
	2.25933	0.111032		0.259659	0.292866		1.74499	0.104595		1.07544	0.196317
	0.462611	0.104595		0.0686454	0.104595		0.237772	0.244591		1.74996	0.614697
	0.155198	0.119077		0.064666	0.125514		0.206931	0.426426		0.39695	0.238155
	0.837673	0.202753		0.10844	0.411943		0.0905324	0.489183		0.151219	11.5569
	0.0606866	0.0691936		0.298459	1.92777		0.0955067	0.81745		0.263638	0.111032
	0.561102	0.447345		1.13613	0.440908		0.138286	2.04041		1.21771	0.279993
	1.02769	0.244591		0.232798	1.97765		0.263638	0.223672		0.190019	0.662971
	0.042779	0.300912		0.833694	0.397461		0.125353	1.95673		0.0606866	0.196317
	0.0775992	0.748257		2.99354	0.942964		3.23529	1.44663		1.23064	1.39031
	1.28735	1.00572		0.164152	2.09673		0.712321	0.886644		0.086553	3.96817
	0.042779	0.95101		0.254685	0.125514		1.6067	0.453781		0.0736198	0.279993
	7.2227	0.154479		0.306417	0.139996		0.0775992	0.26551		0.160173	0.131951
	0.042779	0.0772394		0.186039	0.104595		0.738187	0.259074		0.103466	0.516538
	0.103466	0.279993		0.155198	0.119077		0.134306	0.572859		2.7299	1.11032
	0.518323	0.0772394		3.07611	0.139996		0.570056	0.26551		0.116399	3.69623
	1.46046	0.0691936		0.0994862	0.119077		0.54021	0.292866		1.12718	32.6015
	0.803848	0.104595		0.0736198	0.160915		0.289505	0.432862		0.147239	0.259074
	0.647655	0.131951		0.0815787	0.125514		0.151219	0.397461		1.20478	0.790095
	0.350191	0.119077		0.259659	0.104595		0.0686454	0.104595		1.89621	10.0894
	0.409883	0.196317		0.121373	0.125514		0.444703	0.461827		0.384017	0.131951
	1.46444	0.160915		0.315371	1.39031		0.0686454	0.397461		0.116399	9.02092
	0.436744	0.146433		1.40375	0.181834		2.18969	1.83765		0.46659	0.111032
	0.129332	1.50939		0.112419	0.125514		1.08838	0.104595		0.354171	0.419989
	0.0477534	0.104595		1.61566	0.558376		3.04925	0.139996		0.0736198	0.349186
	0.0994862	1.47399		0.125353	0.188271		0.164152	0.355623		0.0686454	2.90613
	0.0557122	0.0772394		0.483503	5.53388		1.13613	0.160915		2.44935	4.65367
	0.881447	0.60826		0.350191	0.111032		0.414857	0.440908		2.55679	0.119077
	0.064666	2.22868		0.164152	0.593778		0.250705	0.489183		1.62859	0.572859
	0.686454	0.0981584		0.302438	0.104595		0.311392	0.300912		0.0517328	0.796531
	0.401924	1.02664		2.57868	0.119077		0.0905324	0.196317		0.0736198	0.328267
	0.0606866	0.083676		0.0905324	2.09673		0.457636	0.984802		1.88327	2.32684
	2.1688	0.111032		0.168132	0.411943		0.436744	0.873771		0.0775992	1.18112
	0.112419	0.873771		0.164152	0.650098		0.0686454	0.300912		0.151219	3.3052
	1.26546	0.20919		0.345217	3.87806		0.272592	0.160915		0.186039	2.11765
	0.0955067	3.17164		0.112419	0.691936		0.142265	0.279993		0.160173	0.111032
	2.7687	0.083676		0.0955067	0.355623		0.332284	0.131951		0.587963	5.37296
	0.695408	0.111032		0.125353	0.363669		1.81463	0.279993		2.59162	0.928482
	0.0477534	3.63991		0.151219	0.286429		1.00183	0.426426		0.665562	0.942964
	1.13215	0.922045		0.0775992	0.125514		1.28735	0.531021		0.042779	0.175398
	0.0557122	0.230109		0.10844	0.111032		0.272592	0.104595		0.85956	0.131951
	0.112419	0.119077		0.259659	0.125514		0.328304	0.384588		0.042779	0.328267
	0.0557122	0.181834		0.0815787	0.111032		0.345217	0.26551		0.686454	0.146433
	4.63506	0.796531		2.89903	0.104595		0.0775992	0.321831		0.39695	1.20847
	0.794894	0.503665		0.0775992	0.230109		0.129332	0.922045		1.70619	10.8441
	4.24607	0.642053		0.894381	0.26551		0.186039	0.34275		0.173106	3.4098
	0.306417	1.04756		0.837673	0.131951		0.064666	1.87949		1.162	2.11765
	1.90516	0.111032		0.086553	0.999285		0.0736198	1.48203		4.47091	1.62042
	0.453657	1.26479		0.0775992	0.271947		0.704362	0.370105		3.76655	0.328267
	6.98094	0.650098		2.92489	0.119077		0.557122	0.537458		3.8919	0.181834
	1.36097	0.0772394		0.0994862	2.80154		0.215885	0.271947		0.0517328	0.119077
	0.942134	0.104595		0.177085	0.196317		0.444703	0.474701		2.59659	2.38316
	1.06649	0.0981584		0.198972	0.251028		0.0905324	0.600214		0.367104	1.92777
	0.634722	0.313785		1.09335	0.271947		0.232798	0.391024		0.604876	0.146433
	0.0736198	2.11765		0.0686454	0.125514		0.682475	0.244591		0.522302	0.677454
	0.46659	0.125514		0.173106	0.154479		0.376058	0.671017		0.453657	0.510102
	0.0517328	3.01877		0.0994862	0.196317		0.0905324	0.292866		0.112419	0.572859
	0.319351	4.38012		0.151219	0.131951		0.0905324	2.24316		0.116399	0.139996
	1.00183	0.447345		0.293484	0.125514		0.129332	0.286429		0.955067	0.26551
	0.0517328	0.119077		1.17891	0.376542		0.173106	0.915609		0.721275	0.146433
	1.98276	0.131951		0.409883	0.328267		0.202952	0.307348		0.324325	0.160915
	1.36495	0.083676		0.457636	0.34275		0.0686454	0.769176		0.193998	0.175398
	2.37971	0.131951		0.0905324	0.188271		0.0736198	0.230109		2.97165	0.334704
	0.0557122	0.0772394		0.254685	0.230109		0.177085	0.111032		0.380037	0.957447
	0.993867	2.51511		1.58083	0.146433		0.0736198	0.411943		0.125353	0.349186
	0.0557122	1.55122		0.0955067	0.167352		0.138286	0.566422		0.042779	0.230109
	0.042779	1.25836		0.0775992	0.119077		0.138286	2.43787		0.0686454	7.97175
	0.363125	0.0691936		0.626763	0.823887		2.36678	0.154479		1.97878	0.300912
	0.0477534	0.419989		0.129332	0.160915		0.116399	0.175398		1.18786	0.223672
	0.112419	0.376542		0.241751	0.160915		0.116399	0.238155		0.0477534	0.111032
	0.042779	1.78938		0.155198	0.111032		0.103466	0.279993		2.06931	5.14286
	0.198972	0.0691936		2.21158	0.154479		0.228818	0.154479		0.0606866	0.453781
	0.0517328	0.733774		0.0955067	0.196317		0.414857	1.47399		0.0686454	2.47327
	0.0606866	0.376542		1.33013	0.160915		0.206931	0.432862		5.02405	4.52816
	0.0815787	0.292866		0.103466	0.6855		0.993867	0.886644		2.30211	0.111032
	0.997846	0.083676		1.62859	4.95458		0.267618	0.279993		2.39762	0.251028
	0.0815787	0.0981584		1.77981	0.355623		0.341238	0.712855		2.98956	0.160915
	0.0736198	0.516538		0.193998	0.119077		0.752115	1.90041		0.686454	0.223672
	0.0606866	0.370105		0.121373	0.139996		0.112419	1.27928		0.168132	0.334704
	1.45548	0.0901126		0.116399	0.175398		0.557122	0.251028		2.55281	1.74754
	0.121373	0.196317		0.129332	30.051		0.116399	0.244591		0.405903	0.104595
	0.193998	0.300912		0.544189	0.482746		0.160173	0.175398		0.881447	1.1602
	1.53806	0.516538		1.43459	0.104595		0.0994862	1.11032		0.254685	0.104595
	0.168132	0.698373		0.103466	0.328267		0.103466	0.20919		1.28337	4.73091
	0.181065	0.181834		0.440724	1.09744		0.846627	1.03469		0.0994862	3.85714
	0.0557122	0.181834		0.0736198	7.74164		0.241751	0.244591		4.20329	2.27052
	0.0557122	0.698373		0.160173	2.04684		0.190019	1.75398		0.535236	6.00858
	0.376058	0.131951		0.354171	0.181834		1.04062	0.579295		0.0905324	1.23744
	1.0844	0.160915		5.66773	0.196317		0.298459	0.384588		0.10844	0.111032
	0.042779	8.34185		2.18571	1.67674		0.97198	0.154479		0.643675	0.111032
	0.0517328	0.175398		1.8017	0.202753		0.0517328	2.06133		0.794894	0.719292
	0.691429	0.083676		0.0994862	1.5995		0.587963	0.188271		1.03665	2.68246
	0.219864	0.119077		0.142265	0.999285		0.963026	0.111032		0.39297	3.41623
	0.0477534	0.119077		0.10844	0.131951		0.0815787	3.73163		0.186039	0.60826
	0.10844	0.0901126		0.103466	0.125514		0.0606866	2.8305		4.68679	0.26551
	2.0514	0.419989		1.73603	0.119077		1.92207	0.26551		0.259659	2.57787
	3.35666	1.64134		0.0686454	0.223672		0.259659	1.89397		0.0775992	1.17307
	0.125353	0.334704		0.315371	0.111032		3.61135	0.125514		0.0557122	5.93134
	0.237772	0.0691936		0.0686454	0.119077		1.39082	0.125514		1.84049	0.642053
	0.0557122	0.196317		0.064666	0.271947		0.138286	0.111032		0.492457	0.104595
	0.686454	8.53817		1.26148	0.650098		0.0557122	0.20919		1.04062	0.334704
	0.142265	0.223672		0.160173	0.111032		0.371083	1.24388		0.0517328	0.397461
	0.0905324	0.376542		0.0686454	5.45664		0.0815787	3.29716		0.855581	0.104595
	3.04129	1.53674		0.354171	1.54479		1.20975	2.73234		0.0517328	0.223672
	0.0477534	0.754693		1.70619	0.111032		0.0736198	1.19399		0.086553	0.370105
	0.376058	1.28571		2.00465	0.440908		1.10131	3.47899		0.0606866	2.35419
	0.0477534	1.39675		0.10844	0.259074		0.660588	7.31521		3.60239	0.495619
	0.0994862	2.54407		0.665562	0.146433		0.929201	0.468264		1.59377	0.802968
	0.0517328	1.89397		0.10844	1.90041		1.58083	1.32112		0.0557122	1.38387
	0.384017	0.691936		0.0994862	0.405507		0.97198	5.18469		2.32002	0.852852
	0.0517328	0.111032		0.0815787	0.111032		0.0517328	0.188271		0.453657	0.831933
	0.85956	1.18756		0.129332	0.196317		0.0477534	0.119077		0.042779	0.223672
	0.0905324	0.524584		0.61383	5.28285		0.699388	0.397461		0.647655	1.39031
	0.0736198	0.181834		0.0686454	0.691936		2.8851	0.154479		0.241751	0.104595
	2.73885	0.650098		0.142265	0.131951		1.14907	0.119077		0.202952	0.516538
	1.59377	0.0901126		0.112419	0.769176		0.0905324	0.328267		7.01477	0.453781
	1.36893	0.34275		0.112419	0.104595		0.121373	0.146433		1.94794	0.790095
	0.0606866	0.0772394		0.125353	0.154479		0.0606866	0.104595		0.042779	0.313785
	0.488477	0.223672		0.0815787	0.104595		0.0477534	0.321831		0.138286	0.363669
	0.50141	0.131951		0.064666	0.181834		0.0686454	0.363669		0.302438	0.188271
	6.2338	1.92777		0.595922	0.334704		0.85956	0.292866		0.963026	0.286429
	0.10844	0.154479		0.0905324	0.391024		0.064666	0.181834		0.371083	0.125514
	1.57288	1.86501		0.103466	0.671017		1.61963	0.160915		0.0517328	0.419989
	0.042779	0.859288		1.91809	0.131951		0.46659	0.706419		1.20975	0.984802
	0.228818	0.811014		0.328304	0.119077		0.0477534	0.531021		0.842648	0.300912
	0.064666	1.73306		0.752115	0.286429		0.224839	7.27981		0.276572	0.370105
	0.0517328	0.196317		0.444703	1.83765		0.147239	2.38959		6.53127	0.271947
	0.0477534	0.188271		0.177085	0.474701		0.129332	0.244591		0.177085	2.31235
	0.475544	0.202753		2.54884	0.516538		0.0606866	1.46755		0.354171	0.125514
	0.206931	0.0901126		0.064666	0.175398		0.086553	0.244591		0.168132	1.67674
	0.042779	0.188271		0.125353	0.300912		0.765049	0.139996		0.0994862	0.111032
	7.21872	0.0901126		0.064666	4.18541		0.241751	0.614697		0.557122	0.139996
	0.0736198	0.175398		0.0775992	2.01949		0.042779	9.20919		0.086553	0.181834
	0.0557122	0.0901126		1.3351	0.146433		0.0955067	0.915609		0.042779	0.104595
	0.129332	0.397461		0.177085	0.119077		0.0557122	0.167352		0.064666	7.27338
	0.0477534	0.0981584		0.103466	0.397461		0.0815787	0.104595		0.250705	0.160915
	4.67386	1.88593		0.112419	0.516538		0.164152	6.49776		0.0557122	12.4726
	0.0686454	4.2546		0.717295	0.154479		23.5464	0.175398		2.30211	2.45879
	0.116399	0.175398		0.086553	0.230109		1.32615	0.230109		0.0517328	0.131951
	0.0955067	1.41766		0.147239	0.384588		0.202952	0.999285		2.11209	0.119077
	0.0686454	0.111032		0.10844	0.656535		0.0517328	2.37511		0.475544	2.68246
	0.595922	0.217236		0.064666	0.251028		0.224839	1.37583		0.263638	2.01949
	0.600896	0.104595		0.409883	0.489183		0.134306	1.99052		0.0815787	1.01377
	1.21771	0.119077		0.496436	0.119077		2.40657	0.202753		0.0686454	1.62042
	6.67851	1.81673		0.142265	0.175398		0.160173	5.44216		3.6203	0.328267
	1.51219	2.71143		0.319351	1.37583		0.224839	6.17593		0.0736198	0.251028
	1.04958	0.942964		1.29631	0.146433		0.064666	0.363669		0.0517328	0.405507
	0.306417	0.384588		0.103466	1.48847		1.02371	1.22939		5.55133	0.131951
	0.064666	2.15144		0.708341	1.7749		0.112419	0.181834		0.0517328	0.188271
	0.639696	0.440908		0.885427	0.411943		0.0955067	0.125514		0.440724	1.69122
	0.328304	3.36796		0.93318	0.440908		0.401924	3.9553		0.0815787	0.802968
	0.837673	1.23744		0.147239	0.131951		0.042779	0.111032		0.518323	0.292866
	0.0955067	0.81745		0.151219	1.00572		0.232798	0.244591		0.0517328	1.87949
	0.436744	1.43215		0.151219	0.104595		0.0477534	3.63347		0.0606866	0.727338
	0.168132	0.259074		1.37788	0.244591		0.0686454	1.3002		1.23562	0.181834
	6.389	0.907563		0.0994862	1.15215		0.0686454	4.96102		0.219864	0.355623
	0.259659	0.154479		0.717295	0.593778		0.173106	2.3204		0.0775992	0.146433
	0.43177	0.292866		0.0686454	0.104595		1.4515	1.37583		1.07544	0.89469
	0.193998	0.119077		0.086553	0.489183		0.168132	0.978366		0.125353	0.104595
	0.0686454	0.0691936		0.0775992	0.328267		0.272592	0.426426		0.160173	1.50939
	0.259659	0.125514		3.26613	0.244591		0.186039	3.94082		0.112419	0.217236
	1.15802	0.146433		0.405903	0.426426		0.794894	0.131951		0.401924	4.47184
	0.0736198	0.188271		0.388991	0.104595		0.0775992	0.146433		0.626763	0.259074
	0.125353	0.698373		0.103466	0.146433		0.160173	0.167352		0.0517328	0.238155
	0.535236	0.706419		0.198972	0.307348		3.12785	0.181834		0.241751	0.154479
	0.272592	0.852852		0.211905	2.48775		0.0955067	0.196317		0.155198	0.202753
	0.064666	0.397461		0.147239	1.00572		0.224839	0.942964		2.4971	0.510102
	0.0736198	0.635616		1.28735	1.95673		0.0905324	0.154479		0.0606866	1.97765
	0.190019	0.188271		0.837673	0.111032		0.112419	1.53674		0.682475	0.95101
	0.557122	0.111032		0.228818	1.5995		0.630742	0.936528		1.05853	1.03469
	0.190019	0.202753		0.479523	0.139996		1.80567	0.873771		0.798874	0.922045
	0.263638	0.999285		0.0905324	0.196317		0.116399	2.47971		0.0775992	0.292866
	1.66341	0.139996		0.401924	0.104595		0.215885	0.181834		0.086553	0.196317
	0.10844	2.64062		0.427791	2.31235		0.621789	1.25836		1.20478	0.167352
	0.138286	2.12408		1.54601	0.391024		0.39297	0.125514		2.07827	3.20704
	0.561102	0.0772394		0.0994862	0.181834		0.717295	0.34275		0.138286	5.24101
	0.10844	0.104595		0.112419	0.712855		0.151219	0.901126		0.752115	0.111032
	0.202952	0.328267		0.0815787	1.70409		0.0477534	0.984802		0.151219	2.05489
	0.634722	0.111032		0.10844	12.4162		0.0994862	0.188271		2.95872	3.06061
	0.483503	0.587341		0.064666	0.712855		0.730228	0.432862		1.99569	1.41766
	0.0955067	0.167352		0.263638	0.321831		0.064666	0.706419		1.0456	0.60826
	0.280551	0.313785		0.47057	0.440908		0.280551	0.238155		0.93716	0.230109
	10.8599	0.251028		0.103466	0.167352		0.285525	0.167352		0.237772	3.90542
	4.13365	0.160915		0.0955067	0.279993		0.955067	0.727338		0.0815787	0.20919
	5.23994	0.677454		0.0736198	5.45664		0.0557122	0.154479		1.91411	0.629179
	0.086553	0.146433		0.0736198	0.614697		0.125353	0.621133		0.0517328	4.24817
	3.0194	1.11836		4.42813	0.391024		1.09733	0.34275		0.168132	0.111032
	0.647655	1.34203		0.285525	0.131951		1.80567	4.15001		0.121373	0.160915
	0.276572	3.09601		0.125353	0.223672		0.656609	0.292866		0.811807	0.279993
	0.219864	0.566422		0.0905324	0.230109		0.82474	0.167352		2.42746	17.1117
	0.164152	0.0772394		0.298459	0.391024		0.219864	0.217236		0.224839	0.370105
	0.50539	6.75684		0.82474	0.104595		0.064666	0.300912		0.280551	0.915609
	0.116399	1.58663		0.544189	18.0338		0.916268	3.73807		0.237772	1.55766
	0.263638	0.251028		0.0815787	0.489183		0.237772	0.727338		0.617809	0.160915
	0.0994862	6.01502		0.155198	0.279993		0.0686454	1.06204		0.285525	5.01734
	3.87897	0.202753		0.354171	1.56571		0.907314	0.154479		0.0606866	0.482746
	0.777982	2.24316		0.0955067	0.196317		0.678496	0.238155		0.206931	0.119077
	0.112419	1.52387		0.712321	0.922045		0.103466	0.104595		3.82325	0.125514
	0.50141	1.6349		0.241751	1.39031		0.0736198	4.27552		0.206931	0.160915
	0.561102	4.17897		0.82474	0.188271		0.405903	1.83765		0.289505	0.196317
	0.626763	4.78562		0.785941	10.1522		1.32615	0.907563		0.151219	4.77275
	3.24424	1.0202		0.0905324	2.36868		0.699388	0.160915		0.0686454	0.740211
	2.98956	0.196317		1.30028	4.31736		0.0477534	0.111032		1.97381	1.47399
	0.712321	1.0556		0.206931	1.96317		0.211905	0.873771		0.190019	1.57858
	7.84448	0.111032		0.0955067	0.244591		0.147239	2.9351		0.121373	3.57715
	0.103466	0.0772394		0.639696	0.131951		0.660588	3.61255		0.0905324	1.6349
	0.112419	1.0894		0.147239	3.82174		0.561102	0.125514		0.112419	1.92133
	6.82077	0.531021		0.47057	0.769176		0.401924	0.202753		0.121373	0.796531
	3.18754	0.119077		1.38684	0.181834		0.0606866	0.691936		0.116399	0.160915
	0.138286	0.391024		0.129332	0.495619		0.444703	0.202753		1.30028	0.244591
	0.237772	0.196317		2.39264	0.119077		0.686454	0.154479		1.86139	6.45593
	0.142265	2.9351		0.332284	1.18112		0.752115	2.08224		7.88328	0.292866
	4.81215	1.51582		0.10844	0.971929		0.0477534	0.397461		2.00465	0.104595
	3.91777	3.33256		0.116399	1.32112		0.112419	0.292866		0.0736198	0.461827
	0.39297	0.782049		0.384017	2.04684		0.168132	0.992848		0.042779	0.175398
	0.116399	0.119077		0.103466	0.181834		0.354171	0.453781		5.04096	0.447345
	3.3696	0.34275		0.064666	3.84266		0.177085	0.131951		1.61566	0.175398
	1.14509	0.712855		0.0686454	0.202753		0.112419	16.0079		0.125353	0.55194
	5.10563	1.18756		0.509369	0.754693		0.0606866	0.334704		0.717295	1.82317
	1.00183	2.7243		0.0775992	0.621133		0.0686454	7.42786		0.155198	0.167352
	6.27658	0.217236		0.250705	0.181834		0.086553	0.384588		3.03632	0.154479
	4.21125	1.27123		4.32367	0.34275		0.0905324	1.15215		0.0606866	0.600214
	0.566076	1.32755		0.337258	0.202753		4.78628	0.614697		0.186039	0.447345
	5.91843	0.34275		0.086553	0.154479		0.0686454	0.376542		0.103466	0.468264
	0.0775992	0.244591		1.37788	0.175398		0.177085	0.217236		1.25751	1.42571
	1.90019	0.131951		0.803848	0.175398		0.691429	0.111032		0.695408	0.587341
	1.19682	0.244591		0.293484	0.447345		0.0477534	0.901126		2.56575	3.71715
	10.4321	1.13123		0.337258	3.12337		6.57007	7.32165		0.267618	0.426426
	1.26148	0.20919		0.0815787	0.196317		0.280551	0.558376		0.708341	2.1804
	0.116399	0.698373		0.0815787	0.635616		0.086553	0.26551		0.142265	0.572859
	1.36097	0.545503		0.0686454	0.426426		0.177085	0.104595		0.129332	0.831933
	0.245731	0.957447		4.49678	1.16664		0.0994862	1.01377		1.68032	0.300912
	0.384017	0.370105		0.367104	0.111032		0.042779	5.24101		0.0557122	3.75898
	0.086553	0.313785		0.401924	1.40479		0.0557122	0.286429		0.0477534	2.11765
	4.70868	0.482746		0.0955067	5.23297		0.211905	0.621133		0.064666	0.802968
	0.0686454	0.20919		0.0736198	1.09744		0.0905324	0.167352		0.116399	2.09673
	1.78876	0.154479		0.0775992	0.131951		0.0775992	0.313785		0.959047	1.38387
	1.75792	0.271947		0.267618	2.27052		0.371083	0.238155		0.544189	0.20919
	0.0905324	0.230109		0.0955067	0.111032		0.151219	0.131951		4.11674	0.271947
	1.92705	0.139996		0.125353	2.62775		0.0517328	1.57214		0.0477534	0.823887
	0.267618	0.251028		1.65446	0.482746		0.0477534	0.131951		0.134306	2.8997
	0.064666	0.175398		0.0815787	6.65224		0.121373	0.600214		1.30028	1.11836
	0.112419	8.09726		0.363125	0.181834		0.112419	0.531021		0.0815787	0.300912
	5.24392	0.119077		0.280551	0.503665		0.0815787	0.188271		0.259659	0.942964
	0.816781	0.0691936		0.125353	0.26551		0.224839	1.04112		0.134306	0.313785
	0.181065	0.154479		2.32002	0.139996		0.285525	1.4949		0.894381	0.936528
	2.60455	0.125514		0.064666	1.03469		0.440724	2.7243		0.302438	1.33399
	0.769028	8.39818		0.086553	0.104595		0.0775992	1.55122		0.531256	0.202753
	2.33295	9.26551		0.193998	0.181834		0.0517328	0.188271		0.186039	0.139996
	0.064666	0.111032		0.112419	3.56267		0.0517328	2.82246		1.69325	8.88092
	2.91196	0.083676		0.064666	0.447345		0.0517328	3.87806		1.6067	0.516538
	0.0955067	0.175398		2.46228	0.131951		0.0686454	0.244591		0.086553	4.31736
	0.0905324	0.131951		4.70868	0.307348		0.125353	0.754693		1.00183	0.370105
	1.00183	0.440908		1.7629	0.175398		0.0955067	0.223672		1.47737	3.36152
	0.0686454	0.0691936		0.112419	0.397461		0.289505	0.139996		2.50506	0.26551
	1.07147	0.621133		0.811807	1.74754		0.0775992	0.474701		0.0905324	0.154479
	3.07114	0.363669		1.08838	0.600214		0.350191	0.119077		0.475544	0.426426
	0.211905	1.37583		0.738187	0.363669		9.63325	10.5786		3.52877	0.131951
	0.0905324	0.271947		0.324325	0.307348		0.0517328	0.279993		0.0477534	1.54479
	0.345217	0.154479		0.250705	0.363669		0.54021	0.300912		0.0775992	0.202753
	0.0905324	0.0691936		0.708341	0.125514		0.138286	0.334704		0.151219	0.146433
	4.69077	0.650098		0.0686454	6.87591		0.116399	0.405507		0.418837	0.104595
	0.0686454	0.334704		0.920247	0.230109		0.160173	0.119077		0.086553	0.566422
	0.0686454	0.230109		0.0686454	6.58144		0.289505	0.131951		0.0955067	0.769176
	6.92026	0.901126		0.138286	0.691936		0.0686454	1.61398		0.39297	1.04756
	0.116399	8.07634		0.324325	1.26479		0.186039	0.196317		0.129332	0.524584
	0.350191	1.20847		0.557122	0.76113		1.17891	0.146433		0.155198	0.650098
	0.0686454	0.119077		0.064666	12.4999		0.306417	0.642053		0.371083	0.587341
	0.181065	0.0691936		0.228818	0.426426		0.0955067	0.125514		0.186039	0.300912
	0.311392	2.7243		1.10629	0.238155		0.0736198	0.154479		0.595922	1.57214
	0.086553	1.06204		1.26546	0.516538		0.0686454	0.76113		2.33295	0.978366
	0.0815787	0.119077		1.96087	0.349186		0.0775992	0.125514		0.190019	0.251028
	0.254685	0.510102		0.324325	0.313785		0.626763	0.146433		2.71299	0.188271
	0.177085	0.259074		0.955067	0.474701		0.125353	0.614697		0.116399	0.259074
	3.72377	0.0981584		5.69359	0.146433		0.042779	0.188271		0.267618	5.31665
	0.086553	0.125514		0.0815787	0.104595		0.46659	0.286429		0.173106	0.104595
	0.518323	0.0691936		2.4016	0.131951		0.112419	2.16592		2.59162	0.733774
	1.68928	0.160915		4.23314	0.223672		2.66523	0.125514		0.345217	0.376542
	0.0905324	1.44663		0.0815787	0.139996		0.190019	0.139996		0.086553	0.131951
	1.61963	0.691936		0.219864	1.20204		0.0955067	0.167352		0.064666	0.202753
	10.1167	0.0691936		0.371083	0.579295		3.04527	0.119077		2.88112	2.57787
	4.59626	0.125514		0.579009	3.00429		0.164152	2.16592		0.0557122	0.188271
	1.58581	0.125514		0.259659	0.621133		2.13398	0.139996		0.173106	0.447345
	1.81463	0.175398		2.64832	0.411943		0.475544	0.146433		1.55895	0.432862
	0.561102	2.66959		0.064666	0.600214		0.121373	0.131951		0.743162	0.531021
	2.60455	5.79295		0.0686454	0.181834		0.0955067	0.167352		0.0905324	2.30592
	0.263638	2.96245		0.414857	1.11032		1.21771	0.238155		0.134306	0.244591
	0.946114	0.614697		3.66706	0.978366		0.112419	13.673		0.173106	0.104595
	4.14658	0.119077		1.58979	0.572859		0.553143	0.307348		0.0905324	0.119077
	0.116399	0.167352		0.820761	0.167352		0.695408	0.426426		1.97381	1.14572
	4.04312	0.600214		0.121373	0.55194		0.0994862	0.516538		3.03632	0.119077
	0.0815787	1.1602		0.142265	0.188271		0.0606866	11.1241		0.064666	0.217236
	8.73489	0.0772394		0.177085	2.27856		0.129332	0.405507		16.1944	0.238155
	2.03449	0.175398		0.682475	0.271947		4.1426	0.524584		0.112419	0.259074
	0.0686454	1.75398		0.0905324	0.292866		0.193998	0.139996		0.457636	0.175398
	0.0815787	0.474701		0.0815787	0.0772394		4.84697	0.175398		0.0517328	0.712855
	0.177085	0.0901126		0.306417	0.202753		0.0557122	1.57858		0.064666	0.119077
	0.211905	0.328267		0.237772	1.98409		1.2396	0.271947		0.0905324	0.119077
	0.0955067	0.0981584		0.46659	3.31808		0.0905324	0.131951		1.28337	0.125514
	0.112419	0.188271		3.20942	2.49419		0.181065	14.7704		6.54022	0.831933
	0.311392	0.259074		0.401924	0.083676		2.04345	0.656535		0.0557122	0.202753
	0.103466	0.0901126		2.4971	0.111032		0.0955067	0.292866		0.0686454	0.873771
	0.228818	1.0556		0.0775992	0.223672		0.730228	0.160915		1.20478	0.495619
	0.064666	0.0901126		0.181065	0.083676		0.10844	0.300912		0.164152	0.411943
	0.125353	0.131951		0.0736198	0.196317		0.0736198	0.111032		0.0994862	0.104595
	0.630742	1.4595		0.993867	1.0202		0.566076	0.671017		1.90516	3.59807
	2.09518	0.0691936		0.193998	1.36939		0.0775992	7.49061		0.678496	0.125514
	2.35384	0.217236		0.929201	1.83765		1.68032	6.30306		0.350191	1.32755
	1.69723	14.3521		2.73488	0.104595		1.08042	0.259074		0.103466	0.349186
	0.193998	0.0691936		0.289505	0.321831		2.59659	0.139996		0.0815787	0.146433
	0.0815787	3.05256		0.138286	0.733774		0.134306	1.44663		0.042779	0.279993
	0.064666	0.76113		0.103466	4.9047		0.272592	0.307348		0.0815787	4.61827
	0.587963	0.0901126		0.0775992	0.0901126		0.527277	0.363669		0.0517328	0.181834
	1.0456	0.259074		0.064666	0.083676		0.0815787	1.85214		0.129332	1.47399
	1.6843	0.139996		0.147239	0.146433		1.15305	0.104595		0.121373	0.600214
	0.155198	0.363669		0.0775992	3.91346		0.302438	5.37296		0.968	0.202753
	0.518323	0.0901126		0.0686454	0.0772394		0.134306	0.119077		2.91992	1.48847
	0.064666	0.131951		3.01045	0.125514		3.75361	0.154479		0.228818	0.34275
	3.30891	6.81155		1.2008	0.160915		0.042779	0.104595		0.116399	0.131951
	1.90516	0.411943		0.064666	0.0981584		0.0686454	0.355623		0.0557122	0.154479
	0.129332	0.181834		0.0775992	2.56499		0.0736198	0.175398		0.752115	0.76113
	0.0955067	0.300912		8.77766	0.0772394		0.35815	0.901126		0.241751	12.2489
	0.0955067	4.45736		0.479523	2.74522		0.0775992	0.111032		0.50539	0.111032
	0.293484	2.33327		0.241751	0.907563		0.0736198	0.154479		0.647655	2.20132
	0.401924	0.391024		0.591943	0.321831		0.850607	0.244591		0.730228	0.131951
	0.10844	0.922045		6.72626	0.334704		0.444703	0.503665		0.138286	0.111032
	0.272592	0.0691936		0.354171	2.81602		0.0517328	3.18613		6.10348	6.62328
	0.0736198	1.7395		0.345217	0.482746		0.0905324	0.230109		0.10844	0.271947
	0.134306	0.677454		0.0955067	0.125514		0.224839	0.292866		0.198972	1.73306
	4.60024	0.0981584		5.27476	0.083676		0.0477534	0.167352		0.527277	0.20919
	1.43857	0.104595		0.245731	0.217236		0.121373	4.65367		0.50141	0.202753
	0.0775992	0.440908		0.219864	1.22939		0.10844	0.119077		0.0606866	0.119077
	0.155198	1.13123		0.215885	0.167352		0.0994862	0.593778		1.57686	0.411943
	1.26148	0.217236		2.14293	0.238155		0.086553	0.20919		0.211905	0.139996
	0.0994862	0.593778		0.0775992	0.175398		0.10844	0.146433		0.350191	0.160915
	0.064666	0.167352		0.621789	0.0901126		0.134306	0.104595		0.151219	5.67388
	1.78379	2.89326		2.37971	1.5995		0.086553	3.96817		0.129332	0.175398
	0.064666	0.083676		0.0736198	0.104595		0.064666	0.307348		0.168132	0.104595
	0.250705	0.251028		0.0606866	0.391024		0.0815787	0.238155		0.186039	0.111032
	0.591943	0.111032		0.125353	1.04112		0.086553	0.175398		0.82474	0.125514
	1.23064	0.328267		2.48417	0.0981584		0.0517328	0.125514		0.341238	0.217236
	0.064666	4.75183		0.302438	0.111032		0.0686454	0.286429		0.311392	3.38888
	0.354171	1.56571		0.042779	1.17307		0.0736198	7.09154		0.125353	0.111032
	0.086553	2.08868		1.0844	0.230109		0.121373	0.811014		1.77981	0.279993
	0.0775992	0.0901126		0.401924	0.271947		1.6843	0.300912		0.440724	2.84337
	0.064666	2.78062		0.086553	0.196317		0.0955067	0.154479		0.483503	0.139996
	0.0736198	0.928482		0.0955067	1.16664		0.293484	0.111032		0.0905324	1.67674
	0.0686454	0.0691936		0.129332	0.111032		0.0994862	0.300912		0.147239	0.545503
	0.0775992	0.20919		0.652629	0.188271		0.678496	0.495619		3.04925	0.154479
	0.064666	0.0901126		0.0815787	2.43143		0.064666	0.125514		0.798874	0.223672
	1.32615	0.167352		0.376058	0.131951		0.332284	0.111032		0.042779	0.217236
	0.173106	0.230109		0.042779	0.111032		0.112419	0.131951		0.380037	0.160915
	1.58979	0.104595		0.0815787	0.300912		0.570056	0.111032		0.121373	0.271947
	0.116399	0.453781		0.0557122	1.20204		2.53988	0.440908		0.401924	0.131951
	0.833694	6.37869		0.0477534	0.748257		0.626763	0.796531		0.168132	1.54479
	0.0686454	0.181834		0.177085	0.397461		1.58083	0.524584		0.134306	0.230109
	0.963026	2.40408		0.0815787	0.978366		0.155198	0.405507		0.237772	0.363669
	0.112419	1.78133		1.10131	0.0981584		1.48632	0.154479		0.064666	0.111032
	0.134306	0.587341		1.32217	1.71214		0.129332	0.370105		0.254685	0.139996
	0.0775992	0.230109		0.582989	0.181834		0.116399	0.125514		0.042779	0.139996
	6.9889	0.0901126		0.142265	0.0901126		0.202952	0.146433		0.47057	0.111032
	5.20512	0.217236		0.384017	0.355623		0.086553	0.271947		1.53308	1.69766
	0.0775992	0.503665		0.042779	0.181834		0.0557122	0.188271		0.50539	2.76614
	0.241751	1.89397		1.21373	0.495619		0.206931	0.154479		0.116399	4.76471
	0.669542	0.181834		1.32615	0.083676		0.10844	0.104595		0.168132	0.426426
	0.086553	1.1248		0.790915	0.160915		0.89836	0.131951		1.83552	5.88307
	0.112419	0.083676		0.319351	1.33399		0.086553	0.181834		3.30493	0.482746
	0.116399	0.321831		0.46659	0.0772394		0.0736198	0.196317		0.626763	3.97622
	0.112419	0.0772394		2.19864	0.328267		0.267618	1.56571		1.08042	1.25836
	0.0815787	1.4949		0.842648	0.852852		0.0775992	2.66154		0.367104	0.139996
	0.0815787	1.85214		0.803848	0.167352		0.112419	0.139996		0.151219	1.0894
	0.0815787	0.621133		0.103466	7.92991		0.0775992	0.307348		3.55961	1.28571
	2.50506	2.73878		0.0955067	3.26336		0.177085	0.286429		0.993867	0.524584
	0.160173	0.558376		0.354171	0.154479		0.0686454	0.202753		0.198972	1.89397
	0.181065	0.391024		1.70619	0.111032		0.173106	0.313785		0.10844	0.125514
	1.6455	0.160915		0.0905324	0.154479		0.0686454	0.376542		0.086553	4.83551
	2.07827	0.349186		3.9695	0.131951		0.190019	0.300912		0.0905324	0.223672
	1.02769	0.0901126		0.147239	0.300912		0.042779	0.495619		0.0815787	0.160915
	0.0736198	0.349186		1.20478	0.125514		0.259659	1.1248		0.042779	0.405507
	3.86603	0.131951		0.811807	0.922045		0.064666	0.125514		0.522302	0.321831
	0.121373	0.790095		0.129332	5.00286		0.997846	0.349186		0.198972	0.119077
	0.384017	5.65939		0.0815787	0.524584		1.86636	0.719292		0.142265	4.15805
	0.0686454	0.0772394		0.475544	0.915609		0.942134	1.20204		0.177085	0.154479
	0.0736198	3.11693		0.47057	0.432862		0.0517328	0.334704		0.963026	1.04112
	0.894381	0.0772394		0.0736198	3.57071		0.276572	1.1248		0.0686454	0.662971
	0.488477	0.0691936		0.39297	0.160915		0.630742	0.26551		0.0477534	0.558376
	0.0736198	0.154479		1.02371	0.802968		0.042779	0.411943		0.186039	0.154479
	0.0955067	0.0772394		0.695408	0.181834		0.0557122	0.111032		0.042779	8.9646
	0.756095	12.5273		0.0775992	0.154479		0.155198	0.411943		0.0994862	4.70999
	1.26148	4.29644		0.756095	2.05489		0.0775992	0.6855		0.0557122	0.307348
	0.332284	13.4911		0.0606866	0.474701		0.0994862	0.363669		0.086553	0.244591
	0.0955067	0.671017		0.0557122	0.852852		1.87929	2.10316		0.380037	0.154479
	0.202952	0.0772394		0.388991	0.0691936		2.90699	0.217236		0.0955067	0.286429
	0.0815787	1.90685		0.0477534	0.125514		0.116399	0.300912		0.0606866	0.831933
	0.272592	0.0981584		0.0736198	0.405507		1.72808	2.16592		0.224839	0.104595
	0.064666	0.083676		0.371083	0.405507		0.211905	0.175398		0.0517328	4.11461
	0.064666	2.09673		0.743162	4.33828		0.116399	0.384588		0.142265	4.00357
	0.254685	0.292866		0.142265	0.0772394		1.77583	0.662971		0.0736198	2.54407
	3.4472	0.259074		0.337258	0.516538		1.78876	0.349186		0.086553	5.82031
	0.0905324	0.907563		0.0606866	0.259074		0.160173	0.838369		0.0905324	0.175398
	0.064666	1.00572		0.064666	0.238155		0.345217	0.419989		0.0736198	0.181834
	5.99106	2.04041		0.0477534	0.160915		0.142265	0.160915		0.0775992	0.223672
	0.160173	0.244591		0.302438	13.5266		0.43177	0.384588		0.531256	0.181834
	0.414857	5.05114		2.67817	0.146433		0.142265	0.104595		0.10844	0.154479
	0.811807	1.32755		0.147239	0.125514		0.116399	0.131951		0.0517328	0.769176
	0.276572	0.083676		1.13215	0.20919		0.449678	1.5995		1.01078	0.321831
	0.289505	0.76113		0.0736198	0.139996		0.328304	0.119077		0.0557122	8.58645
	0.086553	0.307348		1.92207	0.154479		0.224839	0.271947		0.0517328	0.119077
	0.0775992	0.139996		0.341238	0.0772394		0.086553	0.405507		0.237772	7.30073
	1.65048	0.775612		0.259659	0.677454		0.193998	0.286429		0.254685	0.677454
	0.103466	9.42482		0.155198	0.0901126		0.0477534	2.33327		2.07827	0.202753
	1.61566	0.20919		1.81463	0.516538		0.0815787	0.363669		0.086553	0.119077
	2.90301	0.376542		0.0736198	0.131951		0.311392	0.230109		0.0477534	1.22939
	0.280551	0.838369		0.717295	1.45307		0.328304	0.516538		0.423811	15.958
	0.064666	0.0901126		0.263638	0.175398		0.142265	1.43858		0.557122	1.25031
	0.0736198	7.59521		0.254685	0.307348		0.206931	0.230109		0.302438	0.545503
	0.125353	0.0691936		0.160173	0.748257		0.0994862	0.95101		0.064666	2.11765
	0.46659	2.2496		0.177085	0.146433		7.09336	0.104595		0.0955067	1.7749
	0.0736198	0.167352		0.0557122	0.083676		0.125353	0.474701		0.237772	0.131951
	1.77583	0.083676		0.042779	0.432862		0.10844	0.55194		0.0477534	1.32112
	0.259659	0.0981584		0.302438	0.104595		0.190019	0.139996		1.69723	0.202753
	0.177085	7.90899		0.190019	0.279993		0.134306	0.6855		0.168132	9.14643
	0.427791	0.083676		0.0775992	7.07706		0.924226	0.188271		1.81861	5.20561
	0.293484	0.503665		0.345217	1.50939		1.6843	10.5577		0.064666	0.321831
	0.116399	0.104595		0.868514	0.0691936		0.125353	0.271947		0.254685	0.119077
	0.0775992	0.20919		0.103466	0.175398		0.0477534	0.125514		0.0557122	0.119077
	0.0994862	0.146433		0.0775992	0.223672		0.10844	1.69122		0.0736198	0.370105
	2.25038	0.635616		0.0557122	0.426426		0.341238	4.29644		0.868514	2.145
	0.0815787	0.223672		0.617809	0.154479		0.042779	0.20919		0.086553	0.321831
	0.0736198	2.7951		0.0517328	0.440908		0.285525	5.45021		0.669542	0.593778
	1.6843	12.1572		0.125353	0.593778		0.35815	2.53603		0.10844	0.244591
	0.621789	1.00572		6.16416	0.131951		0.134306	0.111032		0.042779	0.286429
	0.0686454	0.0691936		0.211905	1.02664		0.121373	0.202753		0.496436	0.823887
	2.06434	0.104595		0.522302	0.0772394		0.193998	3.40336		0.125353	0.111032
	0.125353	3.49347		0.911293	0.440908		3.30891	0.139996		0.0477534	6.32398
	3.09302	0.104595		0.181065	0.139996		0.0815787	0.196317		0.0815787	0.238155
	0.064666	0.0772394		0.272592	1.85214		0.0557122	0.769176		0.280551	0.873771
	0.807828	0.0901126		0.289505	0.0772394		0.0736198	2.53603		1.04062	0.545503
	0.160173	0.0981584		0.950093	0.0772394		0.232798	0.328267		2.43642	0.202753
	0.0686454	0.217236		0.138286	0.405507		0.112419	0.447345		0.708341	3.45807
	0.0994862	0.104595		0.142265	0.419989		0.245731	0.432862		2.21158	0.510102
	0.868514	0.104595		1.48135	1.01377		0.418837	0.635616		0.228818	0.495619
	0.0736198	0.083676		0.0517328	0.104595		0.173106	0.119077		0.280551	0.202753
	0.561102	3.10889		0.280551	0.0901126		2.86819	0.656535		0.241751	0.307348
	0.0736198	0.125514		0.0736198	0.0691936		0.164152	0.740211		0.0815787	0.790095
	0.103466	0.384588		0.855581	5.17665		0.042779	0.125514		0.190019	0.376542
	0.121373	0.0772394		1.51219	0.411943		0.306417	4.87735		0.881447	0.217236
	0.0994862	0.104595		3.87897	0.936528		0.328304	3.99714		4.67386	0.650098
	0.112419	3.12337		0.0557122	0.139996		0.086553	0.992848		0.064666	2.40408
	0.206931	0.167352		0.0815787	0.510102		0.401924	1.36939		0.0557122	3.31164
	0.134306	0.790095		0.0686454	0.474701		0.0815787	6.62328		0.086553	0.852852
	0.125353	0.188271		0.134306	0.083676		0.0775992	2.94153		0.129332	2.41051
	0.160173	6.30306		0.587963	0.104595		0.250705	3.64795		0.211905	1.41766
	2.78661	0.587341		0.0557122	0.886644		0.151219	3.38244		2.8075	0.188271
	0.103466	0.0691936		0.0955067	0.503665		0.324325	2.50867		0.134306	1.68318
	0.129332	0.587341		0.0686454	0.119077		0.142265	0.300912		0.241751	1.43858
	0.354171	0.26551		0.591943	0.363669		2.60952	2.98337		0.354171	3.63991
	0.198972	0.26551		0.164152	1.20204		0.042779	0.125514		2.07827	0.440908
	0.086553	2.64867		1.4903	0.131951		3.10198	0.823887		0.211905	0.579295
	0.0686454	0.131951		0.064666	0.26551		0.10844	0.223672		0.193998	5.79295
	0.920247	0.0901126		0.0686454	0.0772394		0.0606866	5.484		1.36097	0.503665
	0.0955067	0.26551		0.285525	12.2827		0.0905324	2.38316		0.920247	1.55122
	0.0686454	1.3002		6.99388	0.167352		0.134306	5.70767		0.0557122	0.119077
	0.064666	0.119077		0.0606866	2.43787		0.0775992	0.154479		0.112419	1.70409
	9.98244	4.63275		1.54601	0.0772394		0.129332	0.139996		0.0557122	0.6855
	0.0736198	0.167352		0.138286	0.111032		0.721275	0.131951		0.319351	0.139996
	0.444703	0.411943		2.18571	0.376542		0.116399	0.244591		0.219864	2.06133
	0.0815787	0.0772394		0.561102	0.181834		0.177085	0.251028		1.98276	0.160915
	0.608855	0.083676		0.449678	0.175398		0.553143	9.27838		0.164152	0.886644
	0.086553	0.104595		4.77335	0.292866		0.604876	0.188271		0.0815787	0.55194
	0.142265	3.51439		0.440724	2.32684		0.409883	0.111032		0.103466	1.69766
	0.134306	2.66959		0.0517328	0.244591		0.0994862	0.397461		0.0815787	2.15144
	0.0686454	0.292866		0.0775992	0.0691936		0.0736198	0.131951		0.064666	0.34275
	0.0955067	0.271947		0.042779	0.154479		2.4583	0.160915		0.134306	0.131951
	0.064666	0.083676		0.0775992	0.230109		0.0736198	0.125514		0.186039	3.51439
	0.129332	0.20919		0.0955067	0.139996		0.0606866	0.349186		0.289505	3.54175
	0.0686454	0.20919		0.219864	0.202753		0.129332	0.621133		0.345217	1.50939
	0.155198	0.244591		0.587963	0.0901126		0.0815787	0.614697		0.0557122	1.09744
	0.064666	1.28571		0.0606866	0.300912		0.0815787	0.907563		1.02371	0.119077
	0.147239	0.642053		0.042779	0.188271		0.103466	0.181834		3.09302	0.196317
	0.064666	0.083676		1.25751	1.11032		0.121373	0.119077		2.39264	0.572859
	0.332284	0.0981584		0.0477534	0.0772394		0.198972	0.482746		1.44255	2.55695
	0.0736198	3.36152		0.380037	0.0901126		0.285525	5.07205		0.116399	0.978366
	0.630742	2.83694		0.0955067	0.292866		0.042779	0.769176		0.116399	0.566422
	0.39297	0.0772394		0.0477534	0.104595		0.276572	0.474701		0.276572	0.928482
	0.186039	0.230109		0.0517328	0.55194		0.219864	0.426426		0.190019	0.111032
	2.74283	13.3801		0.0736198	0.111032		0.10844	0.223672		0.924226	0.823887
	0.608855	0.217236		2.80352	2.15949		0.285525	0.111032		0.842648	0.292866
	0.285525	1.03469		0.151219	21.4709		0.103466	0.823887		0.0994862	0.154479
	0.418837	1.62042		0.0517328	0.321831		0.064666	0.111032		0.0606866	1.04756
	1.02371	0.656535		0.0686454	0.111032		0.0606866	0.131951		0.181065	18.8931
	0.151219	0.0901126		0.0517328	0.167352		0.250705	0.139996		0.0955067	0.119077
	0.35815	2.04041		0.0686454	0.76113		0.0606866	3.17164		0.0517328	0.188271
	0.206931	0.300912		2.32002	0.083676		0.704362	0.181834		0.436744	0.489183
	1.00183	0.271947		0.164152	0.642053		0.682475	0.104595		0.086553	2.31235
	8.3071	0.363669		0.0557122	16.5727		1.81861	0.154479		0.0517328	1.55766
	0.116399	0.292866		3.22236	0.0691936		0.103466	0.111032		0.155198	3.47899
	0.224839	0.0772394		0.042779	0.104595		0.328304	0.440908		1.00183	10.4949
	2.68215	0.167352		0.384017	7.2251		0.206931	0.167352		1.30924	2.10316
	0.0736198	0.440908		3.53375	0.125514		0.0815787	0.238155		0.042779	0.405507
	2.31504	0.146433		0.984913	0.34275		0.215885	0.461827		2.79457	0.823887
	0.682475	0.0772394		0.0905324	0.139996		4.77733	0.531021		0.0477534	0.363669
	0.0815787	0.0772394		0.064666	0.20919		0.202952	2.01305		3.46908	4.55551
	1.30426	0.202753		0.164152	0.104595		0.345217	0.279993		0.147239	0.202753
	0.129332	1.00572		7.23563	0.292866		4.62611	0.503665		0.324325	0.531021
	0.0815787	0.139996		10.1685	0.510102		0.151219	0.111032		2.8851	5.12194
	0.0736198	0.175398		0.112419	0.154479		0.121373	0.20919		1.33908	0.572859
	2.52297	0.0901126		0.112419	0.0772394		0.168132	0.782049		0.086553	0.230109
	0.0994862	0.60826		0.232798	0.453781		0.548169	0.426426		0.43177	0.104595
	3.15371	0.0691936		0.103466	4.27552		1.00183	0.384588		1.95689	0.510102
	1.17891	0.0901126		0.160173	0.0901126		0.462611	0.202753		0.337258	0.251028
	3.24026	0.230109		0.042779	0.642053		0.193998	0.650098		0.686454	0.175398
	3.73272	0.482746		0.0557122	0.545503		0.116399	0.202753		3.70586	2.54407
	0.0775992	0.104595		0.042779	0.181834		0.237772	2.01305		0.371083	1.23744
	4.37142	0.217236		0.0736198	0.111032		0.10844	0.300912		0.10844	4.72287
	0.0686454	1.6349		0.086553	0.111032		0.086553	0.202753		0.042779	0.440908
	0.112419	3.32612		0.0517328	0.160915		0.0686454	0.355623		0.405903	0.251028
	0.0775992	0.915609		0.0775992	0.181834		0.10844	0.55194		1.11424	0.217236
	12.5104	0.0901126		0.232798	0.271947		0.0477534	0.139996		0.147239	0.0981584
	2.15586	0.307348		1.3351	0.119077		2.4583	0.125514		0.475544	0.181834
	2.77367	0.146433		0.064666	0.244591		0.544189	0.131951		0.0517328	0.0901126
	0.198972	0.271947		0.0517328	0.230109		0.134306	0.125514		0.924226	0.363669
	0.0775992	0.131951		0.112419	31.6504		0.103466	0.167352		0.553143	0.453781
	0.0736198	0.405507		0.734208	6.29501		0.0557122	0.286429		0.116399	0.0691936
	8.78662	7.3651		0.0517328	0.104595		0.462611	0.131951		0.142265	0.453781
	0.773007	0.154479		0.042779	0.111032		0.0477534	0.139996		0.103466	0.579295
	4.3366	0.160915		0.160173	0.0772394		0.125353	0.662971		0.142265	0.259074
	0.116399	0.175398		0.0557122	0.20919		0.241751	0.104595		0.042779	5.40032
	0.0955067	0.671017		0.820761	0.196317		0.064666	0.706419		0.409883	0.188271
	0.380037	0.376542		0.89836	0.300912		0.142265	0.271947		0.10844	1.5995
	0.380037	0.0691936		0.509369	0.328267		0.0517328	0.355623		0.0775992	0.175398
	1.96087	0.175398		0.042779	0.223672		0.0905324	0.251028		0.488477	0.111032
	6.13432	0.125514		0.042779	0.104595		0.215885	0.313785		0.686454	0.0691936
	0.0955067	0.782049		0.405903	0.313785		1.17493	0.223672		0.160173	9.95584
	0.116399	0.119077		0.0905324	3.7445		0.656609	2.54407		0.488477	0.119077
	7.20976	0.0691936		0.164152	12.9118		0.142265	1.24388		0.0477534	0.321831
	0.0775992	1.20847		0.064666	0.26551		0.112419	1.86501		0.0994862	0.271947
	0.0905324	0.0901126		0.0686454	0.196317		0.929201	1.85214		0.889406	0.104595
	3.04925	0.146433		0.147239	0.196317		1.32615	0.558376		0.272592	0.292866
	0.306417	0.146433		0.0955067	0.572859		0.042779	0.20919		0.125353	3.31164
	0.173106	0.131951		4.63108	1.51582		0.566076	0.6855		0.10844	0.642053
	7.48136	0.0691936		0.0736198	0.111032		0.35815	0.223672		0.151219	1.11836
	0.811807	0.355623		0.125353	0.691936		3.43426	0.376542		2.09916	0.600214
	3.65413	0.0772394		0.0557122	0.0691936		0.250705	0.251028		0.0955067	0.104595
	0.894381	0.104595		0.198972	0.083676		0.660588	2.54407		0.112419	0.125514
	0.0686454	6.63132		0.0994862	0.146433		0.354171	0.181834		0.548169	1.21652
	1.42166	0.111032		0.621789	0.0981584		0.773007	0.468264		4.12569	0.119077
	0.219864	0.0901126		0.777982	0.0691936		2.00465	1.36295		0.086553	0.355623
	4.64799	0.160915		0.0517328	0.691936		0.0815787	0.34275		0.0606866	0.461827
	0.0686454	0.083676		2.30211	0.600214		0.570056	16.5308		0.147239	0.131951
	0.0775992	0.131951		0.142265	3.22796		0.0736198	0.384588		0.0606866	0.20919
	0.285525	0.119077		0.086553	0.0772394		0.306417	1.1248		0.0686454	0.20919
	0.193998	0.0981584		0.125353	0.642053		0.181065	0.139996		0.522302	1.54479
	0.121373	0.167352		1.6067	0.196317		0.042779	0.154479		0.0557122	3.13785
	0.064666	0.0691936		0.678496	14.6176		0.142265	0.175398		0.168132	0.175398
	0.527277	0.139996		0.202952	2.06776		0.219864	0.60826		2.66523	0.188271
	0.263638	0.167352		2.2464	0.154479		1.24855	1.18112		0.0517328	0.831933
	0.0994862	2.83694		4.83403	3.85714		0.0606866	0.181834		0.582989	0.0772394
	11.5981	0.104595		0.0477534	1.55766		1.07147	0.119077		1.05356	0.083676
	0.315371	0.0691936		0.138286	0.516538		0.267618	0.440908		0.621789	0.146433
	0.112419	0.328267		0.042779	0.146433		1.91809	0.104595		0.43177	0.0772394
	0.0686454	0.313785		0.0686454	0.370105		0.942134	1.51582		0.142265	0.175398
	0.0994862	0.447345		0.0477534	0.0772394		0.151219	0.175398		0.206931	4.18541
	0.228818	0.111032		0.168132	0.125514		1.08042	0.292866		0.0955067	0.279993
	0.190019	0.104595		0.0775992	0.321831		0.462611	4.82102		0.0477534	0.782049
	2.8075	7.6998		0.0955067	1.53031		0.112419	0.119077		0.198972	1.34847
	0.129332	0.635616		0.0477534	0.146433		1.04062	0.160915		0.997846	1.0202
	2.12502	0.154479		0.0517328	0.111032		0.064666	0.125514		0.492457	0.119077
	0.367104	0.111032		0.328304	0.223672		0.206931	6.32398		2.25933	4.4654
	0.064666	5.96674		0.215885	1.10388		0.160173	0.238155		0.177085	0.139996
	0.566076	0.300912		2.17676	1.92133		0.267618	0.131951		0.042779	0.139996
	3.48202	2.53603		0.0557122	0.662971		0.302438	0.111032		0.0606866	0.0772394
	1.52015	0.0901126		0.811807	0.154479		0.50141	3.24245		0.042779	2.64062
	0.190019	0.202753		0.409883	7.0497		0.0955067	0.838369		0.232798	0.083676
	0.0994862	0.104595		2.72095	0.259074		0.0775992	1.94869		0.475544	1.43215
	0.453657	0.0772394		0.0775992	0.531021		0.10844	0.083676		0.608855	0.167352
	1.38684	0.083676		0.0606866	0.131951		0.202952	0.411943		0.341238	0.083676
	0.228818	0.0981584		0.0477534	0.119077		0.384017	0.181834		0.181065	0.271947
	0.125353	0.104595		0.39297	4.40908		0.0955067	0.579295		1.09733	0.363669
	2.89903	0.300912		0.54021	0.775612		0.190019	0.0981584		0.86354	0.160915
	1.99967	0.0981584		1.95291	0.411943		0.298459	0.154479		0.103466	0.230109
	1.09733	0.146433		1.37788	0.230109		0.0517328	0.175398		1.14509	2.18684
	0.0905324	1.69122		1.79672	0.405507		0.414857	0.321831		0.0775992	0.175398
	0.142265	4.26265		0.483503	1.31307		0.112419	0.0772394		0.042779	1.87949
	3.3696	0.202753		1.76687	2.29948		0.0557122	0.0691936		0.064666	0.083676
	0.717295	1.0202		0.43177	0.196317		0.708341	0.181834		0.0686454	0.202753
	0.0815787	0.370105		0.10844	0.104595		0.0736198	0.238155		0.889406	0.461827
	0.35815	4.73091		0.345217	1.51582		0.245731	0.34275		0.0815787	3.4098
	0.401924	0.0691936		0.50539	0.167352		0.686454	0.104595		1.04958	0.349186
	1.04062	0.119077		1.3172	1.0556		0.129332	2.59235		0.889406	1.95673
	0.086553	0.0691936		0.363125	3.60451		0.241751	0.119077		0.0994862	0.154479
	0.10844	4.32541		0.042779	0.125514		0.129332	0.411943		1.16598	0.230109
	0.337258	2.7951		3.75859	3.339		0.0517328	0.292866		0.0517328	1.20204
	0.514343	0.0981584		0.39297	0.196317		0.064666	2.10316		0.0517328	1.39031
	0.254685	6.2049		0.0686454	0.083676		0.168132	0.160915		0.142265	2.25603
	0.259659	0.0691936		0.0557122	0.230109		0.103466	0.104595		0.0606866	1.11032
	0.509369	1.69766		0.669542	0.0772394		0.177085	0.223672		2.47124	0.175398
	0.0994862	0.279993		0.228818	3.3744		0.168132	0.125514		1.38684	0.426426
	2.15984	2.87234		0.276572	0.217236		0.116399	0.901126		0.155198	0.727338
	0.0557122	1.31307		0.35815	0.0691936		0.907314	0.0772394		0.380037	3.96174
	0.206931	4.9047		0.82474	1.21652		0.237772	0.0772394		0.0557122	0.307348
	0.0686454	0.419989		3.6203	0.907563		0.0905324	0.587341		1.01973	0.083676
	2.56177	0.587341		0.0686454	1.95673		0.186039	0.482746		0.042779	1.85214
	0.388991	0.083676		1.01476	1.90685		0.164152	0.34275		0.151219	0.125514
	0.50141	0.0901126		0.285525	0.706419		0.0557122	1.36939		0.042779	0.572859
	0.0686454	0.230109		0.0775992	0.432862		0.0905324	0.0901126		0.0557122	0.545503
	0.570056	0.349186		0.0477534	0.313785		0.10844	0.0691936		0.0517328	0.238155
	0.112419	4.21277		0.0477534	5.19113		1.21771	0.111032		0.97198	0.733774
	0.0517328	4.23368		0.0606866	0.175398		0.345217	0.167352		0.232798	2.3204
	1.55497	0.196317		0.129332	0.0901126		1.91809	0.0772394		0.10844	7.14786
	0.202952	0.0981584		7.83155	0.104595		0.0686454	0.922045		0.0606866	0.510102
	1.78379	0.0901126		0.086553	1.22939		0.311392	2.37511		0.332284	0.370105
	0.0736198	0.119077		1.0844	0.111032		0.116399	2.87234		1.94396	0.160915
	0.0775992	0.125514		0.198972	0.671017		0.206931	1.19399		0.0477534	1.00572
	0.267618	0.823887		0.121373	0.60826		0.785941	0.363669		0.042779	0.083676
	0.0517328	0.915609		0.0606866	0.719292		0.168132	0.196317		0.103466	6.27409
	0.0606866	1.92777		0.574035	0.593778		0.734208	0.957447		0.462611	2.49419
	4.29382	0.0901126		0.0557122	2.06776		0.311392	0.104595		0.042779	0.139996
	4.80817	0.0772394		0.367104	0.397461		0.250705	0.104595		0.0557122	0.384588
	0.61383	0.125514		0.0905324	0.558376		2.14691	0.984802		0.0517328	7.24602
	0.0477534	0.0691936		0.43177	1.79582		0.190019	3.98266		0.0517328	0.0901126
	0.708341	2.97694		3.57255	0.0772394		0.186039	0.181834		0.0557122	1.34203
	0.064666	0.146433		6.39298	0.677454		0.0686454	0.125514		0.0905324	1.75398
	0.0557122	0.0901126		0.527277	0.131951		0.868514	0.313785		1.21771	1.53031
	3.05821	2.35419		0.0955067	6.25317		0.224839	0.397461		1.10629	1.36295
	0.125353	2.40408		0.0815787	0.558376		2.67817	0.811014		0.0686454	0.0691936
	0.0517328	4.93206		0.142265	7.49705		0.181065	3.03165		0.138286	1.75398
	0.112419	10.1457		1.3351	0.349186		0.042779	0.160915		0.639696	0.188271
	0.0557122	0.083676		0.0905324	0.244591		0.103466	0.419989		0.245731	4.91918
	1.11424	4.3946		3.38253	0.34275		0.211905	2.03397		0.10844	0.0772394
	1.30028	0.426426		2.0514	0.748257		0.186039	0.083676		1.11922	1.87949
	0.302438	0.614697		0.0606866	2.73878		0.0905324	0.223672		0.0736198	1.35491
	0.0955067	3.98909		0.190019	1.0202		0.168132	0.531021		0.427791	4.63919
	0.042779	0.083676		0.0557122	0.0772394		0.147239	0.656535		0.219864	9.38298
	0.160173	3.15072		1.08042	0.0901126		0.907314	7.63704		0.0557122	4.51368
	1.42962	0.238155		0.0477534	0.188271		0.0606866	0.524584		0.409883	5.42124
	1.26546	0.259074		0.617809	0.307348		0.803848	0.125514		3.09302	2.145
	1.98674	2.12408		5.83586	0.300912		2.18571	0.154479		0.591943	3.04613
	0.0905324	0.188271		1.04062	4.45736		0.0477534	0.131951		0.566076	1.73306
	0.186039	0.154479		1.32217	8.42553		0.492457	1.73306		0.112419	0.146433
	0.298459	0.34275		0.289505	0.238155		0.302438	0.217236		3.93567	0.083676
	0.0686454	1.99052		0.811807	0.244591		0.177085	0.083676		0.298459	0.154479
	0.064666	1.27123		4.60919	0.202753		0.531256	1.72501		0.699388	0.196317
	0.228818	1.66226		0.0517328	0.391024		0.488477	6.62328		3.30891	4.5346
	0.363125	0.706419		3.23529	0.844806		0.0815787	0.349186		0.289505	2.86429
	0.103466	3.08153		0.708341	0.489183		1.55497	0.125514		0.064666	0.0901126
	0.50141	2.04041		0.103466	0.0772394		0.0955067	0.300912		0.147239	0.244591
	0.042779	2.78706		0.0477534	0.125514		0.0606866	0.131951		0.518323	0.0772394
	2.23744	0.160915		0.125353	0.0981584		0.142265	0.125514		0.332284	0.154479
	0.376058	2.01305		1.24457	0.391024		0.285525	0.167352		0.0736198	0.0981584
	0.0994862	3.45164		0.626763	0.629179		0.064666	0.531021		1.17095	0.238155
	0.0477534	6.84695		0.0557122	0.0691936		0.263638	1.32755		0.929201	4.8693
	0.121373	2.2142		1.60272	3.32612		0.0606866	0.55194		0.0775992	0.0772394
	0.250705	1.31307		0.0775992	0.175398		2.14691	0.202753		0.0606866	0.376542
	1.85343	2.7597		1.42962	0.251028		0.064666	0.154479		1.2784	1.31307
	0.219864	0.0772394		0.837673	0.328267		0.0686454	0.083676		0.10844	0.286429
	0.0477534	0.775612		0.206931	0.461827		1.356	0.139996		0.570056	1.03469
	0.086553	1.47399		0.206931	0.154479		0.0686454	0.286429		0.712321	0.391024
	0.337258	0.537458		0.911293	5.03826		0.164152	0.0901126		0.980934	0.238155
	0.250705	2.13857		0.855581	1.70409		0.0905324	1.44663		0.10844	2.36868
	0.0477534	2.50062		0.0477534	0.922045		0.121373	1.74754		3.4084	0.119077
	0.0606866	0.181834		1.84447	5.02378		0.164152	0.188271		0.492457	2.62775
	4.28089	0.251028		0.855581	0.139996		0.215885	0.154479		0.855581	3.07348
	0.103466	0.0981584		0.548169	0.482746		0.773007	0.104595		1.30426	0.0772394
	0.492457	0.0772394		0.682475	0.196317		0.155198	0.405507		0.206931	3.24888
	0.042779	0.160915		0.669542	0.397461		0.129332	1.68318		0.665562	0.942964
	2.15984	2.25603		1.05356	0.083676		0.263638	1.7749		0.086553	0.119077
	0.0557122	4.38012		4.73853	2.71786		0.324325	0.307348		0.042779	0.196317
	0.298459	0.482746		1.74996	1.6703		0.254685	0.139996		0.444703	0.20919
	0.086553	0.139996		3.42133	0.139996		2.53093	0.223672		0.483503	0.146433
	0.0815787	0.167352		0.388991	3.35348		0.181065	0.181834		0.129332	0.104595
	0.250705	1.5995		1.03665	0.0901126		0.811807	0.139996		0.660588	1.04112
	3.49893	0.0691936		3.19251	0.0981584		0.103466	0.230109		0.0686454	0.119077
	0.164152	0.0901126		2.7299	3.13785		0.103466	0.397461		0.660588	0.936528
	2.38468	0.181834		0.582989	5.27481		0.0736198	0.131951		0.168132	0.579295
	0.151219	2.41051		0.103466	0.0901126		0.042779	0.160915		0.0955067	1.11836
	0.0477534	0.160915		0.0557122	2.45235		0.39297	0.677454		2.25535	2.2142
	0.475544	2.25603		0.639696	8.34185		0.781961	2.73878		0.129332	1.47399
	0.388991	4.3592		0.535236	1.33399		2.95872	0.104595		0.695408	1.79582
	0.380037	0.083676		1.92705	0.482746		0.103466	0.0691936		0.306417	0.083676
	0.0606866	0.238155		1.6843	0.0772394		0.514343	0.0691936		0.0815787	0.181834
	0.263638	3.20061		2.3628	0.244591		0.086553	1.21652		0.678496	0.279993
	0.816781	0.083676		0.112419	0.104595		2.08623	0.125514		0.566076	0.447345
	0.86354	0.238155		0.704362	2.77418		0.129332	0.202753		1.77583	1.64938
	0.042779	1.20204		0.0557122	0.76113		2.43244	0.55194		0.418837	0.188271
	1.03665	0.0772394		1.77085	1.78938		0.0994862	1.31307		3.32582	0.831933
	0.46659	0.0772394		0.39695	0.251028		0.173106	1.88593		0.315371	0.259074
	0.160173	0.286429		0.138286	12.6254		0.241751	0.154479		0.219864	1.24388
	0.85956	0.111032		0.064666	6.5042		0.259659	2.3204		0.0557122	0.26551
	0.215885	1.65582		0.0557122	1.80225		0.354171	0.279993		2.06036	0.286429
	1.74996	0.873771		0.988892	0.0772394		0.232798	1.19399		0.086553	0.111032
	0.0557122	0.0981584		2.73885	5.28285		0.280551	3.05256		0.0517328	0.104595
	0.228818	0.915609		0.086553	5.62399		0.0994862	0.083676		0.0736198	0.748257
	1.89223	0.160915		0.215885	0.188271		0.0477534	1.55122		0.042779	0.831933
	7.80966	0.0772394		0.0477534	16.098		0.042779	0.119077		0.876473	0.104595
	0.259659	2.29948		0.760074	0.531021		0.686454	0.0691936		1.36097	23.6514
[truncated: 4,054 more rows]
