# Supplementary material for: The ER tether VAPA is required for proper cell motility and anchors ER-PM contact sites to focal adhesions
Source: eLife journal article supplement (doi:10.7554/elife.85962), 2024-02-08
Supplement: fig6-data1 [file Figure6.xlsx]

## Sheet: Fig6B
Percentage of central focal adhesion in proximity with GFP MAPPER	Control	VAPA KO	VAPA KO+Ch-VAPA	VAPA KO+Ch-VAPA KD/MD			Percentage of peripheral focal adhesion in proximity with GFP MAPPER	Control	VAPA KO	VAPA KO+Ch-VAPA	VAPA KO+Ch-VAPA KD/MD
	88.23	38.8	52	45.4545				0	10	0	0
	75	30	50	66.6667				0	10	0	10
	72	25	50	50				7.69231	0	0	7.14286
	95	63.1	45.4545	58.3333				0	9.09091	7.69231	9.09091
	63.6364	25	46.1538	54.5455				12.5	0	10	0
	90	54.5455	69.2308	54.5455				11.1111	13.3333	0	0
	66.6667	21.0526	58.3333	63.6364				0	0	6.66667	8.33333
	72.2222	26.3158	65	52.9412				0	0	14.2857	5.55556
	55	25	63.6364	60				6.25	0	10	10
	73.3333	13.3333	57.1429	50				13.3333	0	9.09091	14.2857
	55								10
	89.4737								9.09091

## Sheet: Fig6D
Control						VAPA KO_FA1						VAPA KO_FA2
Time	% Max Intensity Ch-Vinculin	Smoothed Ch-Vinculin	% Max Intensity GFP-MAPPER	Smoothed GFP-MAPPER		Time	% Max Intensity Ch-Vinculin	Smoothed Ch-Vinculin	% Max Intensity GFP-MAPPER	Smoothed GFP-MAPPER		Time	% Max Intensity Ch-Vinculin	Smoothed Ch-Vinculin	% Max Intensity GFP-MAPPER	Smoothed GFP-MAPPER
-11.8333	0	14.4269	0.388134	0.7269		-9.16667	3.48781	8.83828	4.28748	5.33671		-6	1.02965	10.8219	0.681537	1.9736
-11.6667	10.3308	17.5274	1.61741	0.837973		-9	4.54743	10.4726	0	5.61304		-5.83333	5.67763	13.3407	0	2.53318
-11.5	25.1544	20.864	0	0.990875		-8.83333	8.82403	11.837	2.84056	5.80987		-5.66667	9.13132	15.9203	0.196937	3.227
-11.3333	30.5056	24.4265	0.788363	1.21902		-8.66667	12.133	13.336	7.70288	6.05373		-5.5	10.0546	18.3613	1.64631	3.89232
-11.1667	39.1681	28.7951	0.736685	1.40302		-8.5	6.35509	15.1126	3.69301	6.59534		-5.33333	14.7266	21.05	0.192512	4.65095
-11	44.7454	32.8413	2.63447	1.51656		-8.33333	13.5476	17.3421	5.16236	7.12996		-5.16667	16.4731	24.2209	3.71305	5.30337
-10.8333	43.14	36.975	3.18204	1.71646		-8.16667	26.1447	19.7165	8.24407	7.74702		-5	22.3584	27.3632	5.40582	5.93545
-10.6667	38.7871	41.3677	2.36289	1.821		-8	26.8468	22.055	13.1456	8.3295		-4.83333	37.6246	30.7864	7.00566	6.65634
-10.5	37.7906	45.9541	1.99015	2.06034		-7.83333	26.8376	24.6836	7.89636	8.79752		-4.66667	29.9206	34.0566	7.43494	7.25217
-10.3333	36.0913	50.3013	0.512381	2.32005		-7.66667	33.1085	27.7795	11.7071	9.16084		-4.5	44.2128	37.1953	11.3781	8.1223
-10.1667	43.0931	54.7541	1.19519	2.41141		-7.5	35.8443	31.1875	8.84415	9.522		-4.33333	49.8816	40.4375	7.67392	8.97203
-10	66.1325	59.031	2.53222	2.57096		-7.33333	34.577	34.316	7.04111	9.8823		-4.16667	45.4793	44.0076	10.6258	9.7628
-9.83333	74.4384	63.0942	1.47007	2.81235		-7.16667	39.3598	37.4898	13.0054	10.1685		-4	71.4662	47.5787	11.3051	10.4843
-9.66667	80.3554	66.7092	1.8802	2.8848		-7	41.6683	40.9971	12.6241	10.5508		-3.83333	59.3523	51.1486	12.3938	11.2553
-9.5	59.1683	70.2621	2.97533	3.00573		-6.83333	41.809	44.5793	15.5039	11.0511		-3.66667	68.5064	54.3193	14.6597	11.7939
-9.33333	62.8934	73.1135	2.49373	3.16436		-6.66667	42.8673	48.1183	11.2501	11.3783		-3.5	68.4026	57.5526	12.7943	12.418
-9.16667	69.9514	75.8306	6.10019	3.42941		-6.5	38.8181	51.2949	13.4373	11.9093		-3.33333	57.8376	60.9946	16.7817	12.9367
-9	76.7288	78.2951	6.43774	3.60119		-6.33333	53.4096	54.5249	14.0766	12.4367		-3.16667	55.373	64.8137	13.6241	13.5995
-8.83333	99.0833	80.1859	5.77143	3.77913		-6.16667	58.3001	57.7713	11.2276	13.0177		-3	60.9012	68.3146	14.1397	14.0508
-8.66667	88.4325	81.1613	4.26837	3.92516		-6	63.3655	60.5531	13.4709	13.7675		-2.83333	63.6204	71.5459	19.0742	14.2507
-8.5	100	81.8082	3.46572	4.07274		-5.83333	56.7186	63.286	9.87045	14.2738		-2.66667	67.4388	74.3981	14.4649	14.3886
-8.33333	91.451	82.0053	4.97867	4.29492		-5.66667	59.2401	65.7279	14.744	14.8319		-2.5	67.9125	76.5851	14.8633	14.4658
-8.16667	93.0171	81.9773	4.29036	4.54739		-5.5	74.2273	68.1695	18.5379	14.9915		-2.33333	72.3261	78.6582	12.1371	14.4246
-8	94.0773	82.13	2.32551	4.64638		-5.33333	79.8961	70.3804	19.2754	15.2103		-2.16667	83.1685	80.8209	13.5356	14.2968
-7.83333	76.2165	82.2561	3.48331	4.77009		-5.16667	81.6723	72.9954	12.2596	15.4389		-2	83.9486	82.5109	11.3803	14.1424
-7.66667	87.2924	82.2266	5.73405	4.91992		-5	77.468	75.0209	12.6213	15.4317		-1.83333	76.5739	83.5978	14.6553	13.7349
-7.5	87.5748	82.6726	3.68452	5.0862		-4.83333	80.6284	76.9969	10.2041	15.7706		-1.66667	81.9413	84.09	15.9918	13.3828
-7.33333	81.4495	82.5194	6.64446	5.23543		-4.66667	89.2105	79.2986	10.6584	16.0619		-1.5	78.1254	84.4027	14.1153	13.1217
-7.16667	74.5482	81.8612	3.21942	5.32776		-4.5	88.9305	81.0677	13.6223	16.3601		-1.33333	85.6381	84.5154	18.1537	12.6656
-7	78.1232	80.8019	2.34859	5.3423		-4.33333	81.9404	82.6396	16.9789	16.5364		-1.16667	93.4181	84.0321	10.7209	12.4142
-6.83333	70.9648	79.1189	7.04688	5.35917		-4.16667	76.7528	84.0259	17.921	16.823		-1	94.834	83.784	10.212	12.2323
-6.66667	69.5817	77.4017	5.63949	5.25862		-4	87.4436	85.1102	18.8997	16.7752		-0.833333	88.4421	83.5778	10.6258	11.8735
-6.5	68.04	76.2806	3.34917	5.27073		-3.83333	89.9152	85.9589	22.2169	16.8028		-0.666667	89.207	82.7579	11.3383	11.5829
-6.33333	72.407	75.3822	8.14202	5.17792		-3.66667	82.9817	87.3906	20.9467	16.8839		-0.5	89.0627	83.1105	8.4307	11.355
-6.16667	65.0665	75.0519	7.43172	5.05372		-3.5	81.0649	88.2521	18.4202	17.1918		-0.333333	100	82.5885	13.3364	11.0098
-6	74.5923	74.1006	6.76321	4.76573		-3.33333	81.2187	88.6834	24.0115	17.5308		-0.166667	98.3472	82.2572	9.5924	10.697
-5.83333	68.2033	72.8447	3.69772	4.40798		-3.16667	90.2386	89.0131	19.2249	17.4799		0	90.4039	81.5812	10.597	10.3822
-5.66667	62.7855	71.6184	5.91657	4.17269		-3	87.7237	89.4739	19.3231	17.9791		0.166667	73.8484	80.0783	4.02947	10.1954
-5.5	64.9492	70.5827	5.5988	3.99296		-2.83333	84.5225	89.6654	17.4836	18.1274		0.333333	73.2317	78.6514	6.5963	9.95746
-5.33333	77.411	70.4594	6.3003	4.17145		-2.66667	94.2168	90.0455	11.3875	17.6184		0.5	69.9705	77.2836	11.0329	9.82757
-5.16667	74.1166	70.6554	6.0815	4.27736		-2.5	92.5104	90.512	16.2638	17.2323		0.666667	68.2633	75.4321	10.6944	9.94442
-5	72.6659	71.3576	3.46572	3.95638		-2.33333	96.6213	90.5428	13.1961	16.8841		0.833333	74.0258	73.4036	10.0881	10.0041
-4.83333	76.073	71.1399	3.02481	3.46977		-2.16667	92.9731	90.3643	17.6126	16.6126		1	69.2777	71.2993	10.1036	10.0618
-4.66667	75.571	71.7688	4.83243	2.92123		-2	98.6472	90.6254	16.7686	16.6078		1.16667	55.8277	69.5385	9.93317	10.0755
-4.5	72.68	72.436	4.18701	3.30946		-1.83333	84.9957	91.1594	20.3971	16.6913		1.33333	53.139	67.8278	9.3844	9.94355
-4.33333	78.111	72.5692	2.42006	3.7318		-1.66667	86.6285	91.309	22.4777	16.6119		1.5	58.2049	66.1035	12.2787	9.9051
-4.16667	63.4545	73.1639	2.91485	4.30455		-1.5	85.8871	91.1415	12.7643	16.6199		1.66667	61.3787	64.1252	12.2168	10.0401
-4	70.1119	73.9059	3.37995	5.18599		-1.33333	81.2516	91.2289	14.9038	16.593		1.83333	57.7528	62.0386	9.56143	10.1134
-3.83333	71.3758	74.3365	3.61085	6.20986		-1.16667	89.434	91.331	19.0371	16.6571		2	66.8828	60.1214	15.3147	10.5277
-3.66667	72.422	74.6545	4.87751	6.78556		-1	87.9485	91.6802	16.6115	16.7101		2.16667	65.2896	58.7235	9.12772	10.7673
-3.5	78.9949	75.0262	2.46405	7.62293		-0.833333	92.8837	91.7356	16.3339	17.2935		2.33333	63.0226	57.7942	9.99956	10.4603
-3.33333	79.2201	75.2462	5.40968	8.51981		-0.666667	99.1967	91.2731	22.2029	17.6938		2.5	58.7938	57.0884	10.0726	10.4896
-3.16667	81.929	75.3388	3.02151	9.09812		-0.5	100	91.4347	17.4023	18.5919		2.66667	62.269	55.9703	10.0305	10.856
-3	84.2954	75.4689	4.00229	9.20331		-0.333333	82.1915	91.4881	21.2299	19.5353		2.83333	48.8063	54.9444	8.0678	11.1134
-2.83333	75.7436	76.1365	4.53226	9.93769		-0.166667	92.7128	91.3307	14.1916	20.6063		3	53.7899	54.2859	11.8849	11.4023
-2.66667	68.6997	76.3708	10.2553	10.2516		0	98.9982	90.5832	15.2964	22.3253		3.16667	51.0784	54.5165	13.9383	11.5205
-2.5	75.7399	76.6979	12.8458	10.8899		0.166667	97.2931	89.8019	21.4206	23.976		3.33333	55.1261	55.0033	12.9868	11.7345
-2.33333	79.4978	76.707	15.1537	10.6993		0.333333	80.9623	89.219	7.07756	25.2747		3.5	62.0043	55.365	14.7039	11.9713
-2.16667	80.788	76.59	16.8712	11.5978		0.5	94.602	88.4806	15.3441	26.8499		3.66667	50.2197	55.1044	14.445	11.75
-2	81.8126	76.3959	8.37402	12.137		0.666667	88.9515	87.5087	31.0807	28.0954		3.83333	45.2881	55.0976	12.9979	11.6556
-1.83333	65.7421	76.5215	9.56261	12.8558		0.833333	86.0593	87.0565	32.4912	29.1695		4	53.9368	55.0419	12.6593	11.9197
-1.66667	65.1782	76.7317	22.4458	13.6718		1	84.6605	86.0057	29.8161	30.397		4.16667	57.7768	54.8177	10.8957	12.4587
-1.5	86.5511	76.7074	33.2904	13.8022		1.16667	85.3586	85.031	34.7597	31.4486		4.33333	56.4686	54.7785	12.0995	13.0892
-1.33333	69.8116	76.6529	41.1543	13.9333		1.33333	82.4374	84.089	34.8887	32.0832		4.5	47.1397	54.7698	11.0971	13.1661
-1.16667	73.548	76.176	17.9861	14.1373		1.5	76.0087	83.4955	37.5049	33.1135		4.66667	54.0774	54.3746	17.4898	13.3917
-1	72.4276	75.724	19.5595	13.7866		1.66667	84.7801	82.4403	38.6714	33.8521		4.83333	55.449	53.6254	14.0467	14.0974
-0.833333	72.2643	75.3871	19.4694	14.218		1.83333	86.7074	81.3172	39.5351	35.07		5	54.8285	53.0271	13.478	15.6989
-0.666667	71.2613	74.0326	9.40647	15.9608		2	79.5964	80.1717	40.6175	35.6305		5.16667	64.0459	52.5827	18.4767	17.1703
-0.5	76.2803	72.4918	7.45261	17.169		2.16667	85.7556	78.9164	40.6904	36.3755		5.33333	57.2284	51.9579	8.63206	18.7596
-0.333333	73.928	71.2515	15.8827	18.1771		2.33333	77.5363	78.1508	46.8594	36.849		5.5	51.3887	51.6876	19.1273	20.2182
-0.166667	77.2534	69.9549	6.83138	20.1399		2.5	75.283	77.2483	38.8677	37.3038		5.66667	48.3884	51.382	30.4811	21.6469
0	75.1515	68.7461	8.33773	22.8594		2.66667	79.7936	76.0675	48.2783	37.5359		5.83333	46.7711	51.2168	24.1857	24.4755
0.166667	77.0498	66.9933	15.4418	25.7032		2.83333	69.0265	75.3531	39.1313	38.1109		6	55.4465	50.6073	16.9765	27.2897
0.333333	73.6925	65.8794	27.6433	29.3297		3	70.6462	74.7525	44.4338	38.0707		6.16667	58.7292	50.387	21.9751	29.7204
0.5	60.9736	65.1223	17.2065	32.469		3.16667	64.8235	73.5901	43.4188	38.1808		6.33333	53.8723	49.6945	19.4504	31.5926
0.666667	61.1866	63.6519	30.5262	35.4487		3.33333	73.8487	72.6567	23.7676	38.2441		6.5	46.1151	48.9745	31.4967	33.7874
0.833333	64.7362	61.7867	24.0401	38.659		3.5	70.378	72.1543	30.4302	37.5033		6.66667	43.4681	47.9495	28.702	35.3112
1	64.4257	59.7128	47.9494	41.2866		3.66667	70.2741	71.4772	35.9178	37.3157		6.83333	44.1356	47.1722	32.1672	36.9545
1.16667	57.6182	57.7872	24.4513	44.4741		3.83333	69.1238	70.3484	28.1757	36.561		7	47.802	46.3869	41.7773	39.7575
1.33333	55.658	56.1037	36.3768	46.9165		4	68.7504	69.9904	34.4709	35.4514		7.16667	41.4962	45.2155	45.2934	42.0067
1.5	54.7573	54.5955	35.7325	48.3454		4.16667	60.7625	69.3001	31.4424	35.4038		7.33333	39.6966	43.7881	45.1916	44.411
1.66667	44.5155	52.1826	36.0778	50.4264		4.33333	73.7369	68.6587	29.5777	35.4286		7.5	42.5879	42.7476	42.315	46.5244
1.83333	43.1522	49.851	57.2107	52.7548		4.5	76.6384	68.0461	28.4112	34.9558		7.66667	44.7549	41.944	43.4568	47.9547
2	41.2906	48.1871	64.2829	54.9068		4.66667	73.1861	67.5022	42.8832	34.603		7.83333	40.8706	41.1593	65.0403	49.1759
2.16667	47.4684	46.1251	73.0076	56.7684		4.83333	70.1742	67.2304	30.3797	34.3128		8	36.7672	40.0045	69.8973	49.8045
2.33333	38.7074	44.3084	100	58.4922		5	68.661	66.3462	40.9792	33.7741		8.16667	40.8035	38.8056	64.5136	50.2583
2.5	35.0198	42.382	90.2131	59.8982		5.16667	70.516	65.9823	29.4095	33.4652		8.33333	39.6586	37.7321	48.2807	49.5234
2.66667	41.7832	40.4002	62.561	61.0565		5.33333	69.1067	65.5434	35.2252	33.3098		8.5	37.3422	36.5507	55.8263	48.8764
2.83333	48.1515	38.3543	83.6489	61.5464		5.5	65.0667	65.1991	28.7477	33.2431		8.66667	37.2434	35.9839	53.8724	48.4021
3	36.4817	36.5106	98.973	61.5997		5.66667	56.6621	65.2264	37.5329	33.3214		8.83333	36.1365	35.1755	68.4723	47.2717
3.16667	33.1619	34.6388	82.9111	61.6139		5.83333	55.6787	64.6762	33.453	33.5179		9	36.0288	34.3133	69.6207	46.5256
3.33333	32.3372	32.9801	63.1383	60.933		6	67.019	64.0887	36.3973	33.866		9.16667	29.5495	33.2151	33.3533	45.9579
3.5	45.1733	31.3697	62.804	59.8978		6.16667	61.9365	63.8036	30.161	34.4253		9.33333	36.6811	32.2369	29.6933	45.8539
3.66667	28.6674	29.9823	35.2476	58.7395		6.33333	61.5658	63.5273	39.7286	34.7128		9.5	28.9733	31.5494	36.0528	45.6104
3.83333	17.3476	28.6474	42.5485	57.7219		6.5	58.9719	62.7714	37.6507	35.6755		9.66667	25.5601	31.0495	46.7671	44.4335
4	23.6183	26.9764	40.9113	56.0149		6.66667	62.7529	61.8449	28.0607	36.3058		9.83333	27.5903	30.6532	39.507	43.2107
4.16667	22.0288	25.4115	33.0431	54.4963		6.83333	59.2428	61.3195	47.5015	35.4755		10	30.6678	29.7833	59.4021	43.0503
4.33333	30.9119	24.1149	45.4238	52.4643		7	65.565	60.8679	36.6216	35.556		10.1667	25.6614	29.0278	56.4702	42.0436
4.5	29.5691	22.9828	25.8071	51.1088		7.16667	63.4957	60.2665	32.7379	35.8432		10.3333	32.3079	28.2533	23.1103	41.5467
4.66667	23.517	21.7681	40.8706	48.6911		7.33333	57.0157	59.7193	45.7686	36.3239		10.5	30.9654	27.7513	31.3551	41.1755
4.83333	18.65	20.631	55.5108	46.4568		7.5	62.5176	59.1448	29.9927	36.3866		10.6667	30.9768	26.832	18.1426	41.1243
5	25.1459	19.6175	32.0645	43.9928		7.66667	60.0631	58.2442	26.5409	36.5197		10.8333	27.2711	25.8032	16.0139	41.1677
5.16667	18.847	18.3536	29.6059	41.3328		7.83333	59.0127	57.3568	35.0177	36.857		11	23.7946	25.2571	23.4688	40.8225
5.33333	21.1402	17.1294	40.4352	39.3368		8	59.0745	56.9819	35.6514	36.409		11.1667	21.0464	24.726	21.4529	40.9523
5.5	15.1735	15.9266	56.8864	37.6214		8.16667	48.7846	56.6307	33.4474	36.5863		11.3333	19.4443	24.2002	28.1355	41.0278
5.66667	9.90204	15.074	35.517	36.3294		8.33333	58.1752	55.904	43.4861	36.0483		11.5	25.8805	23.5791	32.6761	40.9478
5.83333	9.84668	14.0268	38.7463	36.3076		8.5	53.0007	55.1223	40.3006	35.955		11.6667	24.0454	23.0494	58.8401	41.6986
						8.66667	58.9207	54.3517	38.506	35.4095		11.8333	27.1812	22.7538	54.8681	41.5695
						8.83333	50.6054	53.3447	38.7527	35.3202		12	21.5948	22.2453	53.567	41.9566
						9	46.7837	52.2486	36.3608	34.5736		12.1667	23.5983	21.9138	59.5017	41.6853
						9.16667	55.1397	51.1266	42.0027	34.6152		12.3333	20.1662	21.0988	57.4549	42.3047
						9.33333	54.7374	49.4617	31.8574	34.9151		12.5	23.8466	20.6599	64.6907	42.9879
						9.5	52.0108	48.1787	37.1712	35.242		12.6667	18.8034	20.1559	45.2558	42.7103
						9.66667	39.7252	46.9136	37.948	35.9238		12.8333	20.156	20.0708	35.9046	42.5747
						9.83333	52.3802	45.5423	25.5875	37.2613		13	21.0603	19.7886	61.8583	42.9372
						10	50.1716	44.131	34.6251	38.6598		13.1667	15.8424	19.5115	58.7803	44.0823
						10.1667	47.2109	42.8494	57.1084	40.0747		13.3333	22.4965	19.2918	37.9492	44.1435
						10.3333	40.4575	41.4474	40.1632	42.0096		13.5	17.5027	19.2791	54.6822	45.4236
						10.5	42.4979	40.5115	40.5305	43.7826		13.6667	19.1036	19.1613	40.9741	47.0597
						10.6667	37.7979	39.6243	25.9632	44.766		13.8333	16.4845	19.3951	44.0388	47.5184
						10.8333	35.4197	38.7537	42.0952	46.2859		14	23.1766	20.1938	36.7853	48.8351
						11	32.2435	37.8834	37.3198	47.0068		14.1667	26.4606	21.3425	30.9679	49.1478
						11.1667	42.6372	37.1084	27.6485	48.318		14.3333	18.003	22.5672	35.1058	49.0076
						11.3333	31.6111	36.3656	46.3126	49.9442		14.5	21.8784	23.8971	18.116	48.6926
						11.5	25.9515	35.805	45.9088	51.4467		14.6667	20.3131	25.1347	39.5424	48.3107
						11.6667	31.3179	34.9266	56.385	53.1418		14.8333	20.3409	26.1562	54.9943	47.565
						11.8333	29.86	34.4323	59.5592	55.2368		15	24.0897	27.618	32.685	46.2708
						12	30.3596	33.8713	65.7394	57.2954		15.1667	19.1808	28.811	42.2022	46.0761
						12.1667	35.5407	33.7832	64.0318	59.3411		15.3333	25.2093	30.3355	37.1194	45.9897
						12.3333	34.3009	33.3374	81.821	61.1855		15.5	23.1981	31.5454	57.176	45.6948
						12.5	24.4935	32.9378	76.7988	62.776		15.6667	39.9346	32.6774	55.4147	44.9309
						12.6667	35.5446	32.9811	72.2506	64.7647		15.8333	35.635	33.6194	65.786	43.2019
						12.8333	36.7817	32.8817	80.9153	66.2503		16	35.6286	35.0564	63.3187	42.3032
						13	32.1988	32.7854	70.3298	67.3882		16.1667	36.1555	36.0008	57.2446	41.6726
						13.1667	35.1975	32.4232	65.4198	68.4154		16.3333	38.9151	36.7848	49.8916	40.8404
						13.3333	34.3929	32.4149	64.9795	68.4521		16.5	39.3977	37.4596	38.8321	41.3405
						13.5	35.8693	32.3877	55.2577	69.4868		16.6667	44.2204	37.9026	62.5708	41.9538
						13.6667	37.5876	32.4608	61.3202	71.3294		16.8333	47.4208	38.5433	53.9963	41.7189
						13.8333	33.5213	32.0687	56.6261	72.75		17	51.4659	38.7358	46.1741	41.8904
						14	32.701	31.6791	75.7052	74.5653		17.1667	55.6479	39.099	44.0985	41.6331
						14.1667	26.8665	31.117	78.9832	75.5024		17.3333	45.7111	38.9061	22.099	41.5632
						14.3333	33.8276	30.1881	90.8586	76.6523		17.5	40.8351	39.0338	26.6109	41.2179
						14.5	31.5283	29.2666	73.5937	77.0875		17.6667	38.2059	39.2272	25.7147	40.1478
						14.6667	32.0423	28.817	73.7059	76.5371		17.8333	33.0678	38.9275	27.4739	39.1611
						14.8333	29.5563	27.9831	79.2272	76.3589		18	32.4573	38.754	16.3082	37.2785
						15	29.0449	26.9433	72.4609	76.5657		18.1667	36.0592	38.3444	21.849	36.0103
						15.1667	29.2263	26.1807	71.9057	76.6455		18.3333	29.9459	37.5582	33.8379	35.1442
						15.3333	27.7986	25.1669	70.1952	76.5104		18.5	35.2461	36.8641	27.0136	33.8392
						15.5	22.3546	24.0627	67.7836	76.3412		18.6667	29.1278	35.7455	18.1537	33.4204
						15.6667	25.0536	22.9203	72.2394	75.411		18.8333	31.0072	34.7597	19.4504	32.2258
						15.8333	19.7897	22.0637	75.8062	75.3798		19	34.1025	33.4128	38.5002	31.9152
						16	15.6537	20.7918	69.253	74.6117		19.1667	34.9966	32.7221	69.8995	32.0941
						16.1667	20.1446	19.9711	69.8054	73.8158		19.3333	22.879	31.6338	65.5713	32.7107
						16.3333	18.7603	19.2597	82.1126	72.9205		19.5	27.8512	30.7076	45.3709	33.5209
						16.5	12.8035	18.4545	85.5729	71.6686		19.6667	30.5741	29.8663	41.6136	34.6439
						16.6667	14.8334	17.8717	100	69.9142		19.8333	32.1217	29.0811	31.7733	34.8313
						16.8333	13.9867	17.2224	79.8104	68.1525		20	30.1802	28.2937	27.4429	34.8341
						17	8.13646	16.7822	78.9664	65.7248		20.1667	27.9348	27.5384	28.5604	35.8811
						17.1667	13.0283	16.2613	71.5243	63.1636		20.3333	31.9432	27.0114	33.4971	36.8786
						17.3333	14.5297	15.6467	53.7519	60.8326		20.5	24.7597	26.8423	31.6892	37.6175
						17.5	14.1997	15.284	51.2871	58.8538		20.6667	33.0501	26.827	28.0625	38.6277
						17.6667	21.7695	14.7377	49.2205	56.6324		20.8333	27.451	26.5355	25.6439	38.6314
						17.8333	18.3672	14.6382	52.9415	55.2627		21	25.6361	26.267	36.429	38.4961
						18	16.2913	14.265	58.2917	53.059		21.1667	26.5315	25.8816	36.2299	38.209
						18.1667	16.0047	14.0766	56.2111	51.0223		21.3333	21.8088	25.4029	40.4187	37.7623
						18.3333	14.1366	13.8888	33.8399	49.4408		21.5	21.111	24.8815	43.0983	36.7364
						18.5	9.47611	13.7332	35.0625	47.4177		21.6667	26.1566	24.5122	51.3365	35.5953
						18.6667	12.9403	13.7221	33.2062	45.1229		21.8333	22.7814	23.9428	43.9812	35.537
						18.8333	14.7085	13.6125	30.3124	43.1176		22	24.4519	23.7078	27.9164	34.8605
						19	21.6788	13.2628	41.2204	40.9372		22.1667	21.886	23.1606	42.9965	33.4779
						19.1667	13.9815	13.1425	28.5262	38.9679		22.3333	25.3271	22.5842	41.5228	32.2055
						19.3333	14.8334	12.8339	39.4425	37.2429		22.5	21.6112	22.2715	29.7442	31.1434
						19.5	13.1664	12.3446	31.162	35.3957		22.6667	27.4813	22.0723	31.6627	31.5121
						19.6667	12.4381	12.0001	38.9714	33.6774		22.8333	22.0633	21.3812	28.5958	31.7454
						19.8333	11.0379	11.6066	35.2812	32.5947		23	18.3956	20.8809	16.1821	31.3541
						20	8.16407	10.9706	39.8744	31.9146		23.1667	17.8447	20.4434	36.1812	30.8536
						20.1667	9.76928	10.3736	35.1158	32.1442		23.3333	17.0823	20.1436	31.9083	29.9799
						20.3333	6.31565	9.72125	37.8442	32.0137		23.5	21.0236	19.7699	29.9013	29.1225
						20.5	11.9858	8.80501	42.5579	32.1617		23.6667	19.562	19.5386	26.9273	28.6925
						20.6667	13.0665	8.01911	25.5174	32.3293		23.8333	16.0298	19.4557	28.5493	28.4132
						20.8333	7.04923	7.27261	29.4655	32.0407		24	19.6039	19.1044	19.6406	28.0528
						21	6.55361	6.50927	38.6322	31.7784		24.1667	21.0844	19.065	22.1101	27.522
						21.1667	1.41984	6.058	28.9159	31.5456		24.3333	17.7662	18.8481	26.1883	26.8384
						21.3333	7.6921	5.54269	35.5673	31.5701		24.5	19.6849	18.5668	26.144	26.5244
						21.5	4.79327	4.99526	31.019	31.9619		24.6667	17.7294	18.3233	29.461	26.2271
						21.6667	3.47335	4.47768	23.8153	32.4737		24.8333	18.2284	17.9004	30.636	26.1296
						21.8333	2.99349	3.92868	28.9412	32.2601		25	18.2424	17.4267	35.8293	26.2125
						22	0	3.22203	36.874	32.0958		25.1667	17.9903	17.1375	14.9827	26.7362
						22.1667	2.089	2.65512	28.4925	31.8661		25.3333	14.1732	16.7369	20.5324	27.141
						22.3333	3.95846	2.19416	31.3527	31.5123		25.5	16.4756	16.4081	25.936	27.0088
						22.5	0.96102	2.07569	31.6527	31.5776		25.6667	19.3518	15.9972	18.001	27.4816
						22.6667						25.8333	16.1894	15.7337	27.8147	28.0177
												26	15.0914	15.3593	23.7719	28.1847
												26.1667	16.3135	15.2412	30.7554	28.4435
												26.3333	15.3117	14.973	33.8069	28.6074
												26.5	16.6719	14.5833	37.323	28.2634
												26.6667	15.5245	14.1714	41.2308	28.6336
												26.8333	16.8075	13.7263	38.3541	28.8986
												27	11.0082	13.4382	27.5757	29.1157
												27.1667	9.56193		32.4416
												27.3333	10.0014		34.11
												27.5	12.6154		33.4241
												27.6667	20.5233		43.0563
												27.8333	14.3695		26.9804
												28	15.2547		20.7183
												28.1667	13.488		33.0899
												28.3333	12.6901		56.5498
												28.5	13.1245		49.9226
												28.6667	15.8019		47.9156
												28.8333	14.5734		59.0635
												29	18.6945		56.5808
												29.1667	13.7856		59.5813
												29.3333	10.8626		34.4353
												29.5	18.0891		64.0113
												29.6667	10.2357		41.337
												29.8333	8.73111		30.8462
												30	8.93628		34.6588
												30.1667	10.1128		42.731
												30.3333	17.461		33.7117
												30.5	10.0774		61.3848
												30.6667	15.8703		60.597
												30.8333	8.8109		65.4275
												31	7.23413		59.8115
												31.1667	15.0205		61.1613
												31.3333	11.8758		72.0769
												31.5	9.35042		78.6489
												31.6667	8.89322		75.5598
												31.8333	9.75443		66.8725
												32	8.15486		85.9112
												32.1667	10.4383		87.4624
												32.3333	11.6351		77.3566
												32.5	11.8378		74.0928
												32.6667	10.6828		70.7913
												32.8333	13.5463		51.071
												33	15.6613		65.5072
												33.1667	14.6785		60.7143
												33.3333	16.891		60.628
												33.5	10.66		100
												33.6667	20.1497		70.6143
												33.8333	15.2117		47.8447
												34	14.8406		49.7212
												34.1667	8.66779		56.3662
												34.3333	4.5264		45.0456
												34.5	5.57251		33.2448
												34.6667	3.94382		55.3682
												34.8333	3.77664		36.7786
												35	4.12113		27.4894
												35.1667	2.46204		26.3343
												35.3333	1.07144		9.75836
												35.5	0		18.7246
												36.6667

## Sheet: Fig6E
Time of MAPPER anchoring relative to FA disassembly (min)	Control	VAPA KO			Histogram categories (min)	Control (%)	VAPA KO (%)
	-1.16667	-6.5			<-10	14.3	4.8
	-2.5	0			-10	23.8	14.3
	1.66667	-3			-5	33.3	28.6
	-2.5	-1.33333			5	23.8	28.6
	7	0.5			10	4.8	23.8
	-21.6667	5.83333			>10	0	0
	3.5	1.5
	-1	-3.66667
	2.16667	-2.16667
	-18.8333	0.166667
	-0.833333	-9.5
	-10	2
	-0.833333	5.16667
	-6.33333	-23.6667
	2.83333	3.33333
	0.666667	-6.5
	-9.83333	-1.16667
	-8.33333	5.5
	-6.83333	5.5
	-28.5	8.16667
	-2.83333	-3.33333

## Sheet: Fig6F
Duration of 1st MAPPER anchoring to FA (min)	Control	VAPA KO
	9.67	4.5
	3.33	1
	6.33	0.666667
	7.5	0.833333
	4.17	2.83333
	16.83	3.66667
	27.33	3.5
	5.17	1
	18.5	0.166667
	18.17	0.666667
	7.67	1.33333
	28.17	0.333333
	2.17	0.833333
	20.83	0.666667
	19.33	4
	0.17	1.83333
	6.17	1
	6.83	1
	6.5	2.5
	6.33	0.666667
	4.33	3

## Sheet: Fig6H
Linescan1								Linescan2
Distance to origin (mm)	Normalized grey levels iRFP-Vinculin	Smoothed iRFP-Vinculin	Normalized grey levels Ch-VAPA	Smoothed Ch-VAPA	Normalized grey levels GFP-MAPPER	Smoothed GFP-MAPPER		Distance to origin (mm)	Normalized grey levels iRFP-Vinculin	Smoothed iRFP-Vinculin	Normalized grey levels Ch-VAPA	Smoothed Ch-VAPA	Normalized grey levels GFP-MAPPER	Smoothed GFP-MAPPER
0	0.0528346	0.0745193	0.1276	0.139633	0.0943633	0.0892611		0	0.286381	0.344223	0.216758	0.200829	0.0389915	0.0381797
0.09678	0.102873	0.057164	0.233312	0.212509	0.0825008	0.0760932		0.09678	0.553807	0.497462	0.167586	0.188774	0.0406369	0.0420363
0.19356	0	0.0376015	0.410067	0.487729	0.106439	0.113286		0.19356	0.681266	0.725509	0.205909	0.198449	0.0550441	0.0566185
0.29035	0.0745365	0.0799046	0.865894	0.76564	0.288598	0.314118		0.29035	0.918729	0.900884	0.221196	0.214994	0.0770038	0.0739933
0.38713	0.218118	0.190455	0.902759	0.954699	0.671517	0.680582		0.38713	1	0.991074	0.189948	0.196992	0.0829384	0.0810013
0.48391	0.259753	0.263401	0.992255	1.00119	1	0.959842		0.48391	0.867082	0.841126	0.161026	0.148784	0.084393	0.0912947
0.58069	0.351189	0.39006	1	0.958685	0.913098	0.903182		0.58069	0.566122	0.61072	0.101106	0.119842	0.115512	0.114971
0.67747	0.601618	0.566739	0.687352	0.691743	0.518378	0.487923		0.67747	0.446093	0.447786	0.119684	0.105981	0.129921	0.117415
0.77426	0.666728	0.631853	0.297679	0.302463	0.0390903	0.133984		0.77426	0.335654	0.278622	0.10767	0.105784	0.0875608	0.0961779
0.87104	0.609125	0.710943	0.0231203	0.0451598	0.0537933	0.0059154		0.87104	0.0437089	0.112767	0.115844	0.122658	0.0942848	0.105296
0.96782	0.898285	0.803716	0	0.00730939	0.0339512	0.034104		0.96782	0.0445409	0.010168	0.216995	0.225022	0.155414	0.129211
1.0646	0.815806	0.822283	0.107516	0.0907558	0.00960304	0.0147812		1.0646	0.00676195	0.011708	0.404419	0.397953	0.147803	0.150157
1.16139	0.746595	0.850201	0.139591	0.119517	0.00900476	0.00044647		1.16139	0	0.00436332	0.577766	0.567656	0.254004	0.292957
1.25817	1	0.870961	0.0856869	0.126992	0	0.0192364		1.25817	0.0361785	0.0345261	0.712125	0.732754	0.629104	0.628119
1.35495	0.676639	0.715416	0.169462	0.132295	0.0502791	0.0243282		1.35495	0.0763157	0.064543	0.900539	0.887597	0.97373	0.953759
1.45173	0.382588	0.401925	0.132678	0.153956	0.00310759	0.0199081		1.45173	0.100709	0.109923	0.995376	0.999214	1	0.968234
1.54851	0.271525	0.27488	0.150717	0.142926	0.00451182	0.000107457		1.54851	0.227002	0.22708	1	0.984692	0.653024	0.650863
								1.6453	0.46534	0.526378	0.873001	0.887327	0.248509	0.294973
								1.74208	0.824958	0.691505	0.751562	0.750384	0.127378	0.116239
								1.83886	0.602979	0.744519	0.605734	0.5991	0.0884742	0.0792573
								1.93564	0.653471	0.481292	0.419306	0.422116	0.0605894	0.0739254
								2.03242	0.179207	0.368181	0.253456	0.249577	0.0800446	0.0615226
								2.12921	0.391721	0.249371	0.136577	0.154748	0.0275736	0.0304396
								2.22599	0.297854	0.389533	0.142321	0.124524	0	0.0175432
								2.32277	0.5652	0.544233	0.132351	0.147414	0.0607106	0.0447449
								2.41955	0.791773	0.776609	0.175958	0.167574	0.0684215	0.0710048
								2.51634	0.820204	0.818825	0.1667	0.158597	0.0681151	0.0744091
								2.61312	0.670042	0.654185	0.0959472	0.105684	0.0746349	0.0592287
								2.7099	0.376931	0.38404	0.0496086	0.0427032	0.0293947	0.0477972
								2.80668	0.161518	0.191786	0	0.00878461	0.0535466	0.0434584
