# Supplementary material for: The ER tether VAPA is required for proper cell motility and anchors ER-PM contact sites to focal adhesions
Source: eLife journal article supplement (doi:10.7554/elife.85962), 2024-02-08
Supplement: fig6-figsupp1-data1 [file Figure6-figSup1.xlsx]

## Sheet: Fig6-figSup1
Crop1_Linescan1				Crop1_Linescan2				Crop1_Linescan3				Crop2_Linescan1				Crop2_Linescan2				Crop2_Linescan3
Distance to origin (mm)	Normalized grey levels Ch-Vinculin	Normalized grey levels GFP-MAPPER		Distance to origin (mm)	Normalized grey levels Ch-Vinculin	Normalized grey levels GFP-MAPPER		Distance to origin (mm)	Normalized grey levels Ch-Vinculin	Normalized grey levels GFP-MAPPER		Distance to origin (mm)	Normalized grey levels Ch-Vinculin	Normalized grey levels GFP-MAPPER		Distance to origin (mm)	Normalized grey levels Ch-Vinculin	Normalized grey levels GFP-MAPPER		Distance to origin (mm)	Normalized grey levels Ch-Vinculin	Normalized grey levels GFP-MAPPER
0	0	0.0019094		0	0.145914	0		0	0	0		0	0.00159696	0.0918936		0	0	0		0	0	0.0551165
0.03102	0.000360408	0		0.031138	0.177633	0		0.031057	0	0.0456674		0.031303	0.00157516	0.124765		0.031303	0.078109	0.0813634		0.031303	0.17284	0.014237
0.06204	0.0145713	7.11893e-05		0.062276	0.347958	0		0.062113	0.0131075	0.156878		0.062606	0	0.225989		0.062606	0.195681	0.241283		0.062606	0.4041	0.0617207
0.09306	0.145768	0.00347762		0.093414	0.596757	3.29384e-06		0.09317	0.12085	0.231797		0.093909	0.000696376	0.433375		0.093909	0.355056	0.507641		0.093909	0.640219	0.194678
0.12408	0.267535	0.0105967		0.124552	0.843943	0		0.124226	0.318512	0.233642		0.125212	0.00984793	0.688823		0.125212	0.530518	0.813614		0.125212	0.828534	0.291241
0.1551	0.363685	0.0075041		0.155691	1	0.00669554		0.155283	0.535954	0.207848		0.156515	0.0236343	0.881723		0.156515	0.701168	0.983766		0.156515	0.946053	0.290006
0.18612	0.439911	0.000602791		0.186829	0.966735	0.0366489		0.186339	0.73919	0.188158		0.187818	0.0340622	0.9065		0.187818	0.84185	1		0.187818	0.983886	0.226399
0.21714	0.52367	0		0.217967	0.720455	0.1082		0.217396	0.875022	0.174501		0.219121	0.0584939	0.755354		0.219121	0.938997	0.759016		0.219121	1	0.16101
0.24816	0.628454	0		0.249105	0.252873	0.235735		0.248452	0.964717	0.124745		0.250424	0.153009	0.50977		0.250424	1	0.446994		0.250424	0.997925	0.133801
0.27918	0.737144	0		0.280243	0.0190629	0.434262		0.279509	1	0.0644822		0.281727	0.357361	0.29592		0.281727	0.99302	0.185123		0.281727	0.977056	0.173099
0.3102	0.82291	0.00274502		0.311381	0	0.687572		0.310565	0.993811	0.0269575		0.31303	0.636932	0.176011		0.31303	0.914104	0.0435183		0.31303	0.912754	0.227626
0.34122	0.889631	0.0121509		0.342519	0	0.916069		0.341622	0.939422	0.00611963		0.344333	0.886802	0.121118		0.344333	0.764084	0.0128373		0.344333	0.801745	0.313953
0.37224	0.931754	0.0214762		0.373657	0	1		0.372678	0.822882	0		0.375636	1	0.0783711		0.375636	0.575424	0.043291		0.375636	0.674799	0.491475
0.40326	0.967381	0.0204893		0.404795	0	0.961511		0.403735	0.662502	0		0.406939	0.951904	0.0283678		0.406939	0.397806	0.0846422		0.406939	0.577815	0.738471
0.43428	0.997394	0.00812296		0.435934	0	0.775048		0.434792	0.480294	0		0.438242	0.829164	0		0.438242	0.246419	0.0837978		0.438242	0.525276	0.947633
0.4653	1	0.000503707		0.467072	0	0.521725		0.465848	0.292408	0.153178		0.469545	0.754815	0.017138		0.469545	0.131806	0.075693		0.469545	0.527198	1
0.49632	0.956839	0		0.49821	0	0.304758		0.496905	0.124713	0.472598		0.500848	0.796003	0.0555226		0.500848	0.0844958	0.0665498		0.500848	0.576712	0.776318
0.52734	0.877126	0.00145887		0.529348	0	0.155439		0.527961	0.0201661	0.796715		0.532151	0.911209	0.0657557						0.532151	0.644055	0.4218
0.55836	0.782594	0.0015752		0.560486	0	0.0712291		0.559018	0	1		0.563454	0.981099	0.0464414						0.563454	0.70857	0.121103
0.58938	0.689424	0.000212236		0.591624	0	0.0207765		0.590074	0	0.991906		0.594756	0.927145	0.0830827						0.594756	0.750111	0
0.6204	0.601828	0		0.622762	0	0.00125972		0.621131	0	0.784386		0.626059	0.750737	0.283537						0.626059	0.737019	0.0149652
0.65142	0.511522	0.00482712		0.6539	0	0		0.652187	0	0.569891		0.657362	0.538736	0.635281						0.657362	0.665395	0.0490688
0.68244	0.410421	0.0329786						0.683244	0	0.42579		0.688665	0.394939	0.9424						0.688665	0.561943	0.0400453
0.71346	0.298397	0.107544						0.7143	0	0.338285		0.719968	0.367771	1						0.719968	0.441523	0.0200837
0.74448	0.178757	0.230739						0.745357	0	0.197135		0.751271	0.422259	0.77744						0.751271	0.340219	0.0441286
0.7755	0.0669419	0.412801						0.776414	0	0.0464463		0.782574	0.483239	0.430253						0.782574	0.278941	0.112986
0.80652	0	0.635024						0.80747	0.00798067	0		0.813877	0.498717	0.15484						0.813877	0.23091	0.157738
0.83754	0	0.84078						0.838527	0.0333873	0		0.84518	0.497851	0.0498241						0.84518	0.187466	0.142258
0.86856	0	0.980802																		0.876483	0.133291	0.106601
0.89958	0	1																		0.907786	0.073792	0.0746134
0.9306	0	0.897684
0.96162	0	0.74331
0.99264	0	0.609392
1.02366	0	0.502435
1.05468	0	0.394181
1.0857	0	0.284749
1.11672	0	0.19334
1.14774	0	0.127127
1.17876	0	0.0810835
1.20978	0	0.056548
1.2408	0	0.0489071
