# Supplementary material for: The ER tether VAPA is required for proper cell motility and anchors ER-PM contact sites to focal adhesions
Source: eLife. 2024 Mar 6;13:e85962. doi: 10.7554/eLife.85962 (PMC10917420; doi:10.7554/eLife.85962)
Supplement: Supplementary file 1. [file elife-85962-supp1.xlsx]

## Sheet: Template
Key Resources Table
Reagent type (species) or resource	Designation	Source or reference	Identifiers	Additional information
Antibody	Goat anti-rabbit IgG-Alexa fluor 488	Invitrogen	A11033	1/2000 for IF
Antibody	Goat anti-rabbit IgG-Alexa fluor 555	Invitrogen	A21429	1/2000 for IF
Antibody	Goat anti-Mouse IgG-Alexa fluor 488	Invitrogen	A31620	1/2000 for IF
Antibody	Goat anti-Mouse IgG-Alexa fluor 555	Invitrogen	A21424	1/2000 for IF
Antibody	Goat anti-Mouse IgM-Alexa fluor 488	Invitrogen	A21042	1/2000 for IF
Antibody	Goat anti-Mouse IgM-Alexa fluor 555	Invitrogen	A21426	1/2000 for IF
Antibody	Horseradish peroxidase-coupled anti-Rabbit IgG	GE Healthcare	NA934V	1/10000 for WB
Antibody	Horseradish peroxidase-coupled anti-Mouse IgG	GE Healthcare	NA931V	1/10000 for WB
Antibody	Mouse anti-VAPA monoclonal antibody	Sigma	10355-4C12	1/100 for IF
Antibody	Rabbit anti-VAPA polyclonal antibody	Sigma	SAB2702059	1/500 for WB
Antibody	Rabbit anti-VAPB polyclonal antibody	Atlas antibody	HPA 013144	1/100 for IF, 1/1000 for WB
Antibody	Mouse anti-Paxilline monoclonal antibody	Merck	05-417	1/100 for IF
Antibody	Mouse anti-Cortactin monoclonal antibody	Merck	05-180	1/100 for IF
Antibody	Mouse anti-EEA1 monoclonal antibody	BD Transduction	610456	1/100 for IF
Antibody	Rabbit anti-TGN46 polyclonal antibody	Abcam	ab50595	1/100 for IF
Antibody	Mouse anti-PI(4,5)P2 monoclonal IgM antibody	Echelon	Z-P045	1/100 for IF
Antibody	Mouse anti-Tubulin monoclonal antibody	Gene Tex	GTX628802	1/100 for IF
Antibody	Mouse anti-GAPDH	ProteinTech	60004-1-Ig	1/1000 for WB
Cell line (H.sapiens)	Caco-2	ATCC	ATCC HTB-37	Kindly provided by S.Robine ( Institut Cuire/CNRS, Paris)
Chemical compound, drug	Alexa fluor 647-conjugated Phalloidin	Invitrogen	A22287	1/200
Chemical compound, drug	Mitomycin C	Merck	M4287	10 μg/ml for 1 hour
Chemical compound, drug	Trypsin-EDTA	Life Technologies	25300-054
Chemical compound, drug	Complete Protease inhibitor cocktail	Roche	4693116001
Chemical compound, drug	Phosphatase inhibitor cocktail (PhosSTOP)	Roche	4906845001
Chemical compound, drug	Methanol-free formaldehyde	Thermofisher	28908
Chemical compound, drug	Fluoromont-G with DAPI	Invitrogen	00-4959-52
Chemical compound, drug	DMEM (containing Glutamax, High Glucose and Pyruvate)	Gibco	10569010
Chemical compound, drug	Fluorobrite DMEM	Gibco	A1896701
Chemical compound, drug	Penicillin/Streptomycin	Gibco	15140122
Chemical compound, drug	Foetal Bovine Serum	Dutscher	S1810-500
Chemical compound, drug	Geneticin	Gibco	10131-019
Chemical compound, drug	Puromycin	Gibco	A1113803
Chemical compound, drug	4-12% Bis-Tris gel	Invitrogen	NP0335BOX
Chemical compound, drug	Nocodazole	Merck	M1404
Chemical compound, drug	Agar Low Viscosity Resin	Agar Scientific	AGR1078
Commercial assay or kit	Bradford assay	BioRad	500-0006
Commercial assay or kit	Supersignal west femto maximum sensitivity substrate	Thermo Scientific	34095
Commercial assay or kit	MycoStrip Mycoplasma detection Kit	Invivogen	rep-mys-20
Commercial assay or kit	NucleoBond Xtra Midi kit for transfection-grade plasmid DNA	Macherey-Nagel	740410.50
Commercial assay or kit	NucleoSpin Gel and PCR clean up kit	Macherey-Nagel	740609.50
Commercial assay or kit	NEBuilder HiFi DNA assembly kit	New England Biolabs	E5520S
Commercial assay or kit	Cell Line Nucleofector™ Kit T	Lonza	VCA-1002
Genetic reagent (Plasmid)	Double Nickase CRISPR Cas9 Plasmid for VAP-A (h)	Santa Cruz	sc-403093-NIC
Genetic reagent (Plasmid)	Double Nickase CRISPR Cas9 Control Plasmid	Santa Cruz	sc-437281
Genetic reagent (Plasmid)	m-Cherry cortactin	Kindly provided by Alexis Gautreau, Biochemisty laboratory, Ecole polytechnique, France	https://portail.polytechnique.edu/bioc/en/gautreau	pcDNA5-FRT-GFP-mCherry-3pGW back bone (1740-pcDNAM FRTPC-mCherry Cortactine)
Genetic reagent (Plasmid)	pEGFP-MAPPER	Kindly provided by Jen Liou (UT Southwestern Medical Center, USA)	https://pubmed.ncbi.nlm.nih.gov/24183667/	Long version, containing the two flexible helical linkers, (EAAAR) 4 and (EAAAR) 6, upstream and downstream flanking regions of the FRB, respectively
Genetic reagent (Plasmid)	pmCherry-Vinculin	Addgene (Gift from Chinten James Lim)	plasmid # 80024 ; http://n2t.net/addgene:80024 ; RRID:Addgene_80024
Genetic reagent (Plasmid)	iRFP-Vinculin	Kindly provided by Mathieu Coppey (Institut Curie, CNRS UMR168)	https://pubmed.ncbi.nlm.nih.gov/28186127/
Genetic reagent (Plasmid)	pEGFP-PH-OSBP	Addgene (Gift from Marci Scidmore)	plasmid # 49571 ; http://n2t.net/addgene:49571 ; RRID:Addgene_49571
Genetic reagent (Plasmid)	pmRFP-PH-PLCd1	Kindly provided by Francesca Giordano (Institute for Integrative Biology of the Cell, France)	https://pubmed.ncbi.nlm.nih.gov/23791178/
Genetic reagent (Plasmid)	mCherry-P4M-SidM	Addgene (Gift from Tamas Balla)	plasmid # 51471 ; http://n2t.net/addgene:51471 ; RRID:Addgene_51471
Genetic reagent (Plasmid)	pmRFP-KDEL	Kindly provided by Nihal Altan-Bonnet (National Heart Lung and Blood Institute, NIH, USA)	https://pubmed.ncbi.nlm.nih.gov/16314396/
Genetic reagent (Plasmid)	pmCherry-VAPA	Kindly provided by Fabien Alpy (IGBMC, France)	https://pubmed.ncbi.nlm.nih.gov/24105263/
Genetic reagent (Plasmid)	pmCherry-VAPA KD/MD	Kindly provided by Fabien Alpy (IGBMC, France)	https://pubmed.ncbi.nlm.nih.gov/24105263/
Peptide, recombinant protein	Human Plasma Fibronectin	Sigma	FC010
Peptide, recombinant protein	DpnI enzyme	Agilent	500402
Software, algorithm	FIJI-Image J	https://imagej.net/Fiji/Downloads	Image analysis were done using Fiji-Image J and plugins
Software, algorithm	Illustrator	Adobe	Images were mounted using these softwares
Software, algorithm	GraphPad prism	GraphPad Prism	Graphs and statistical tests were done using GraphPad Prism
