# Supplementary figures and images for: The ER tether VAPA is required for proper cell motility and anchors ER-PM contact sites to focal adhesions
Source: eLife journal article supplement (doi:10.7554/elife.85962), 2024-02-08

Blots presented in Figure 1A

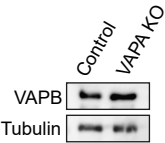

Original blot for VAPB

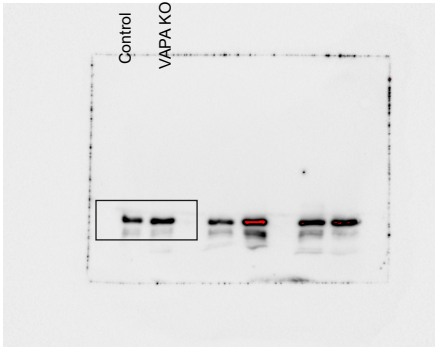

Original blot for Tubulin

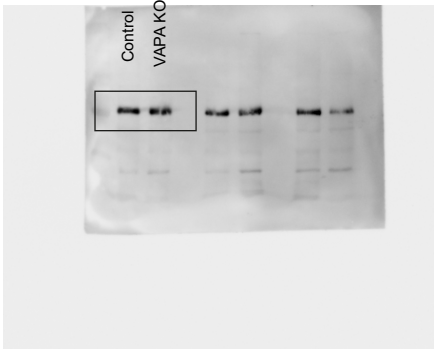

Supplement: fig1-figsupp1-data2 [file elife-85962-fig1-figsupp1-data2-v1.zip]
